# Supplementary material for: linc-mipep and linc-wrb encode micropeptides that regulate chromatin accessibility in vertebrate-specific neural cells
Source: eLife journal article supplement (doi:10.7554/elife.82249), 2023-04-14

**Supplementary Figure 1.** ATAC peak intensity plots for statistically different peaks between wild type and *linc-mipep1* cells. Per cluster: top, heat-map of chromatin accessibility by peak (blue scale increasing in accessibility); bottom, P value of statistically different chromatin accessibility peaks between wild type and mutant cells, using Wilcoxon rank sum (red) and the Kolmogorov-Smirnov (blue) methods using one-tailed tests for each condition. Raw p-value thresholds of 0.001 and 0.01 for the Wilcoxon and the KS tests, respectively, were deemed to be significant peaks for further analysis.

### Wild type - yellow

### *linc-mipep1* mutant - green

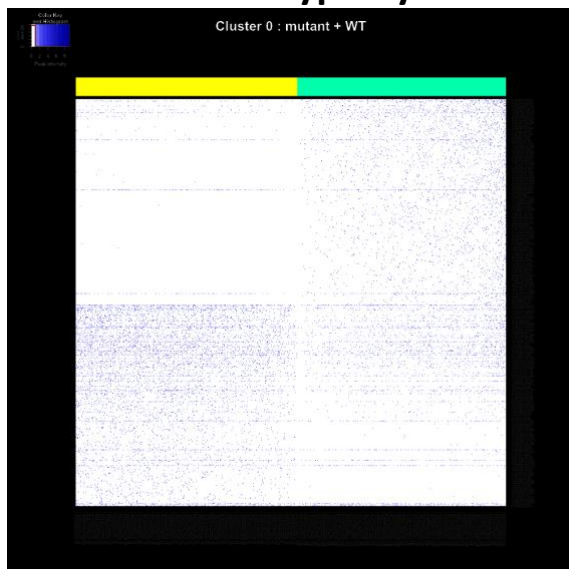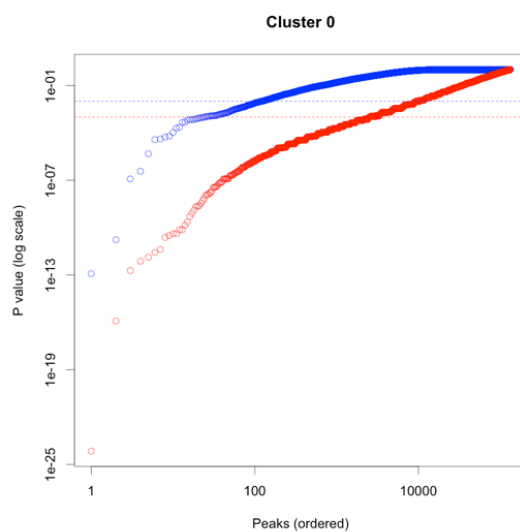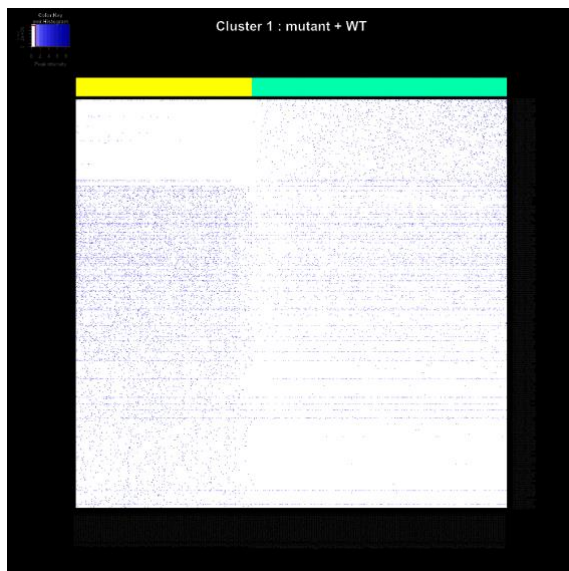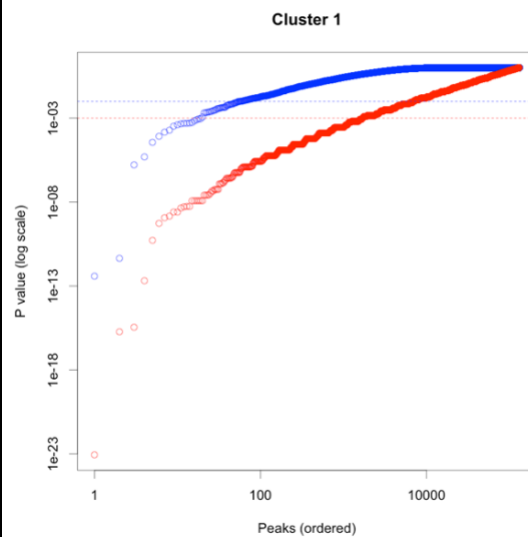

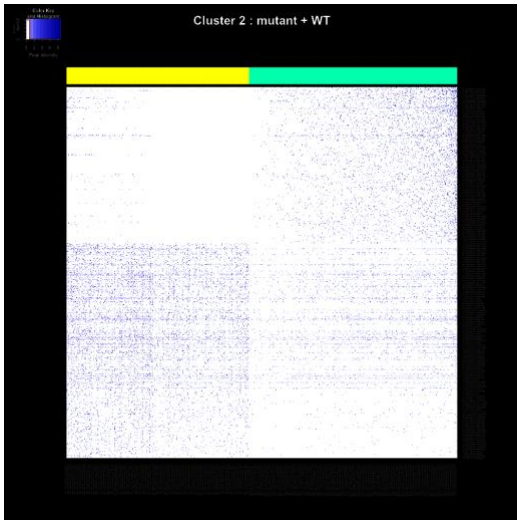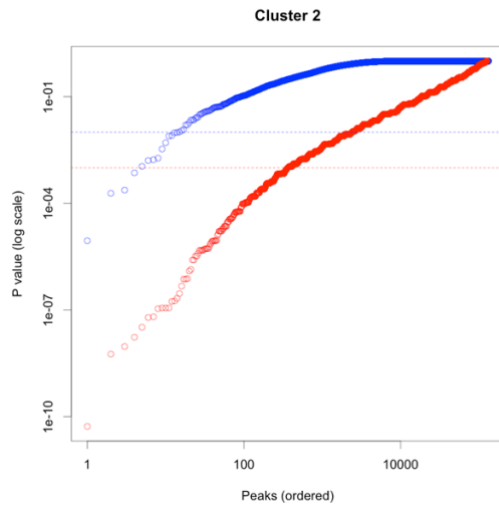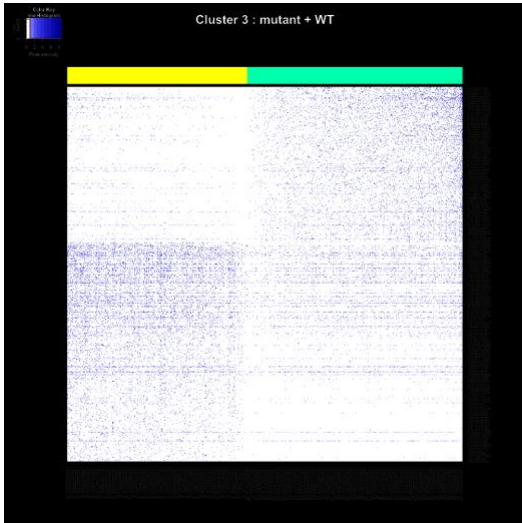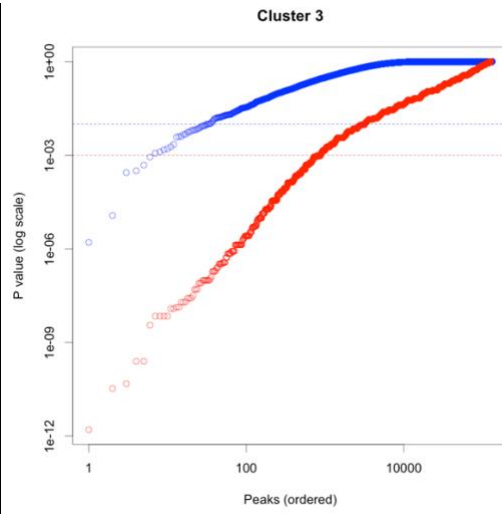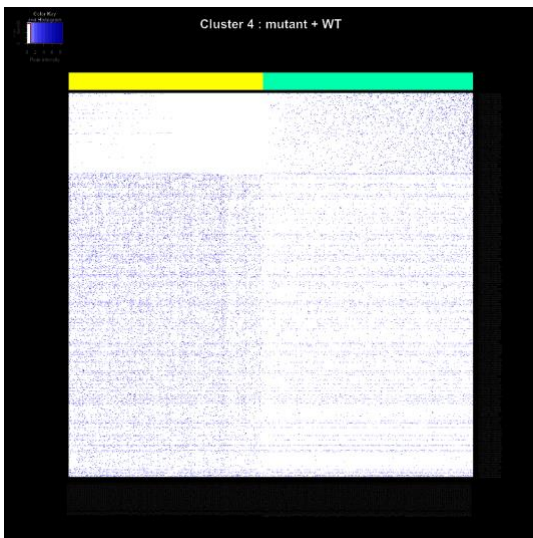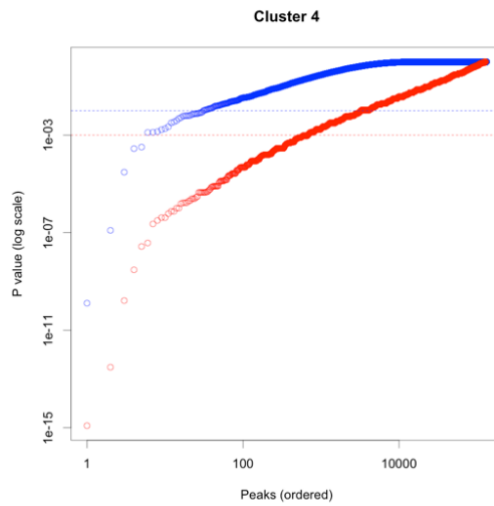

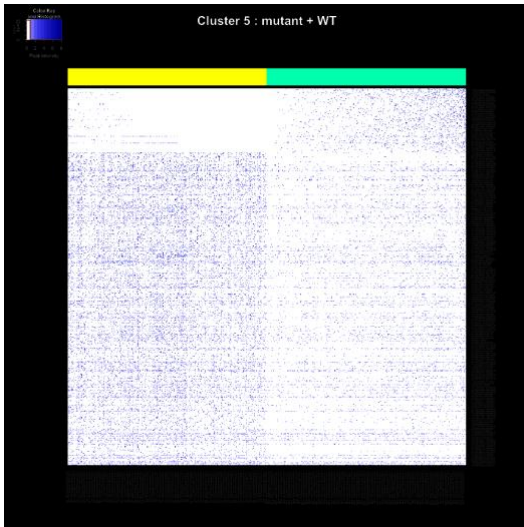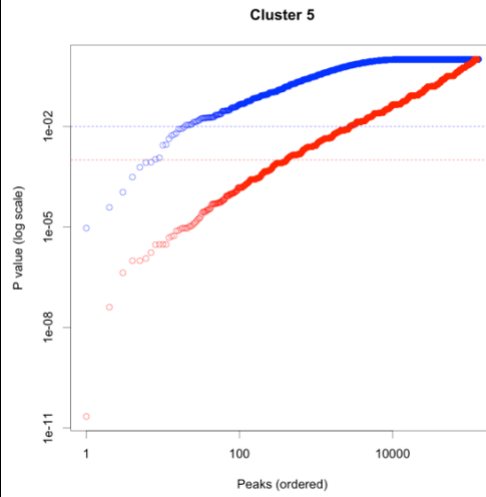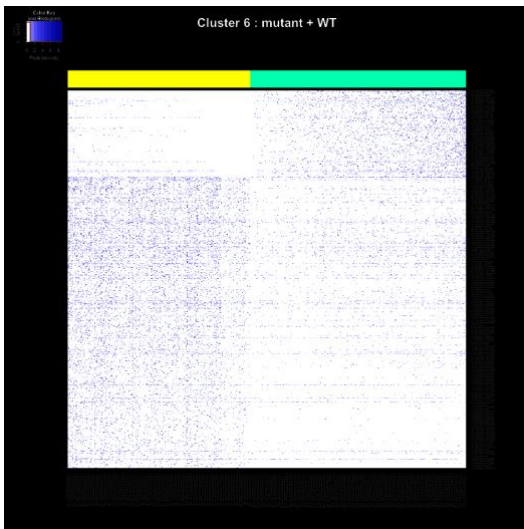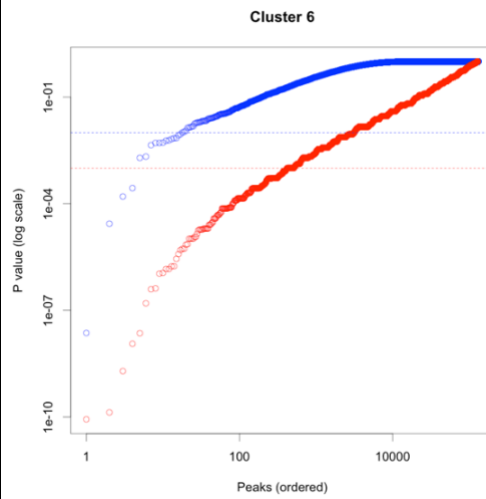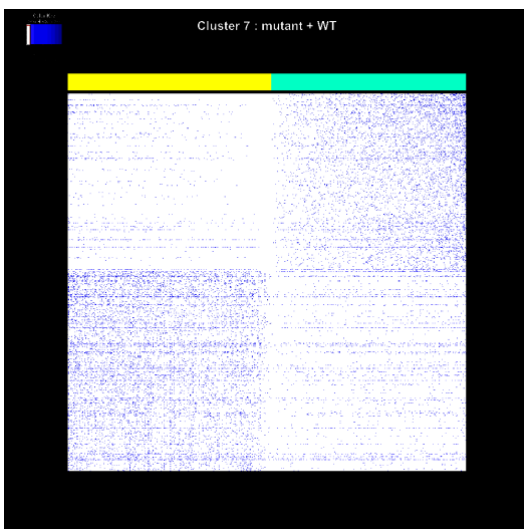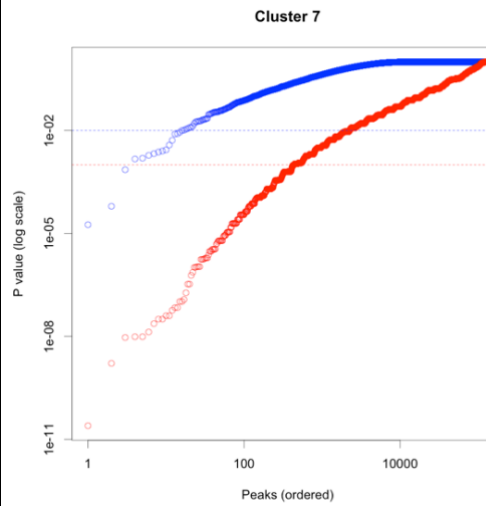

# Cluster 8

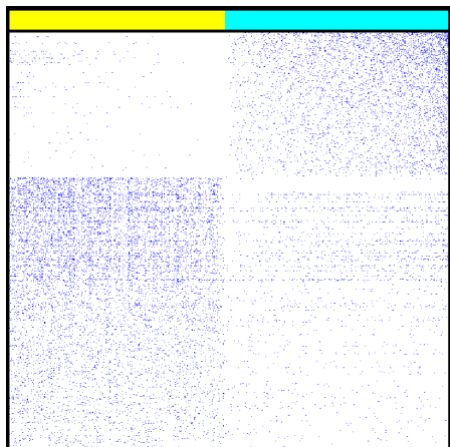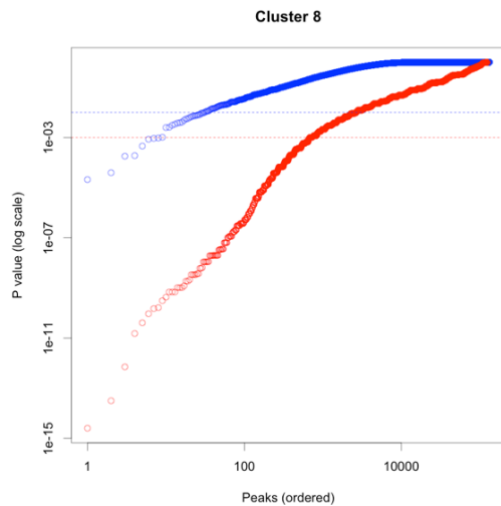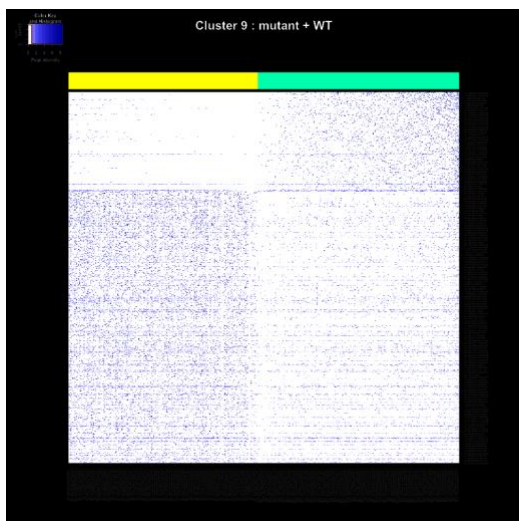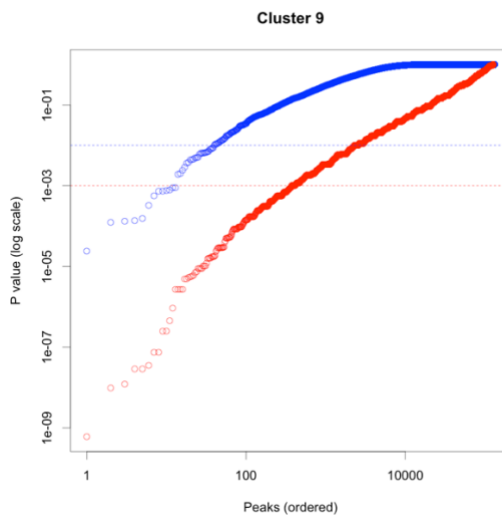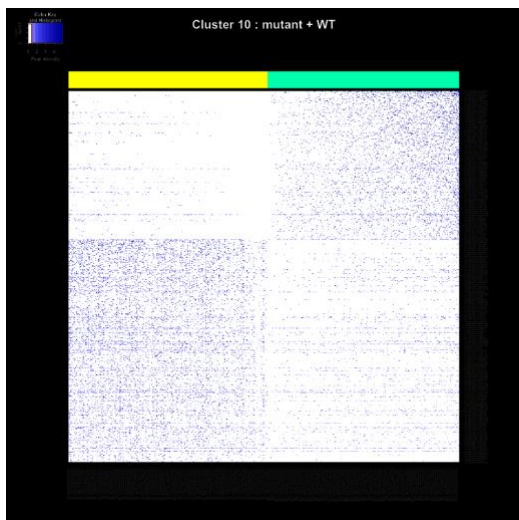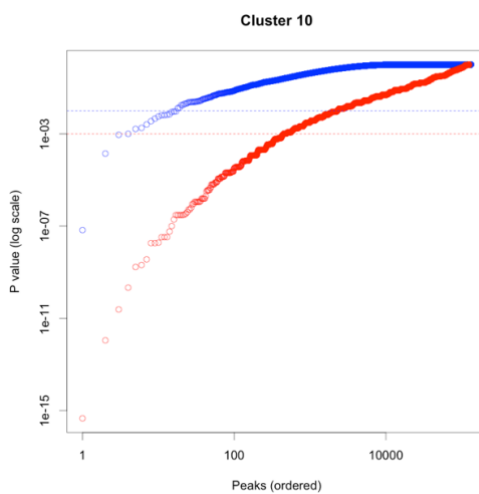



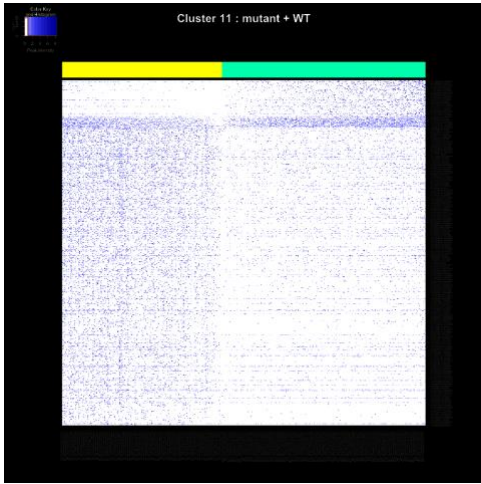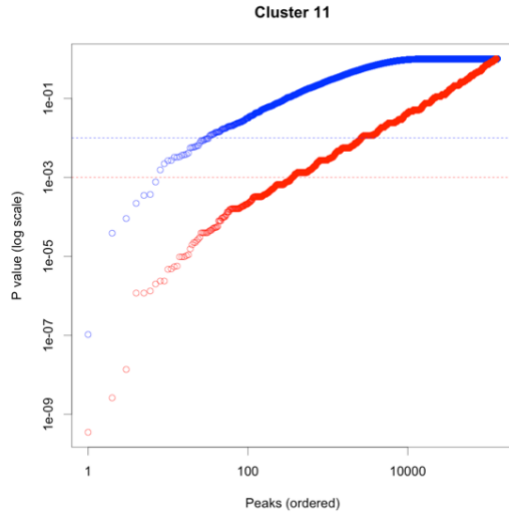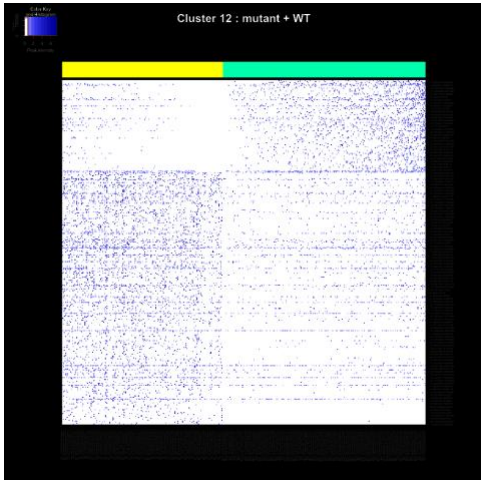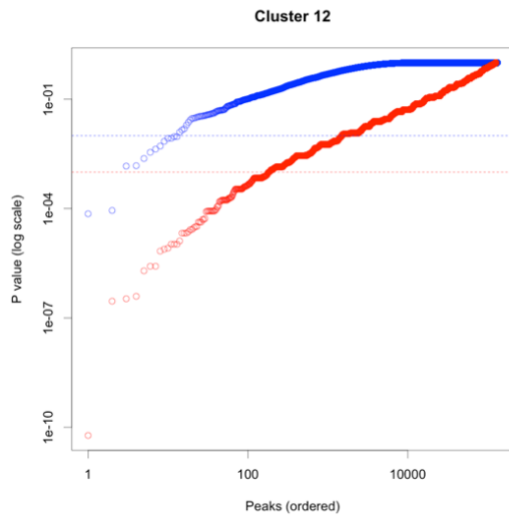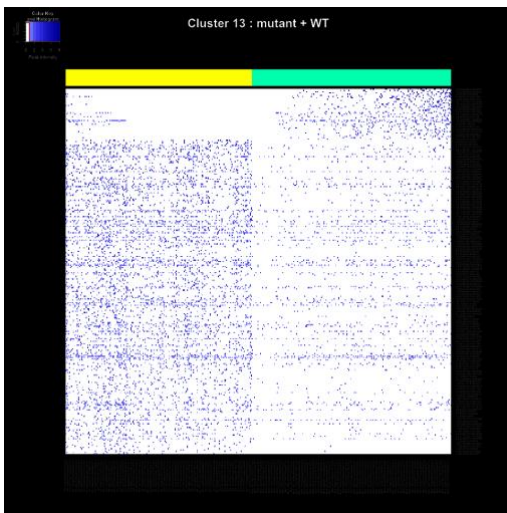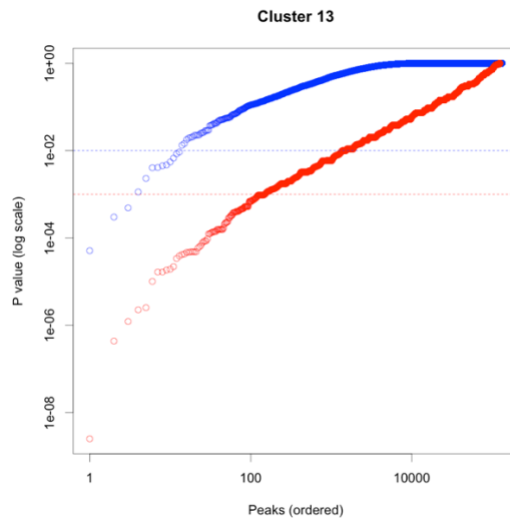

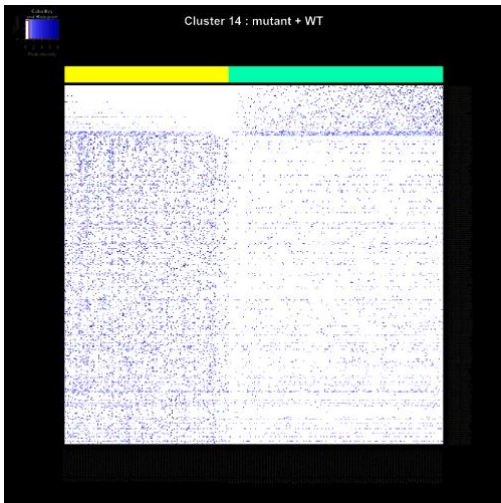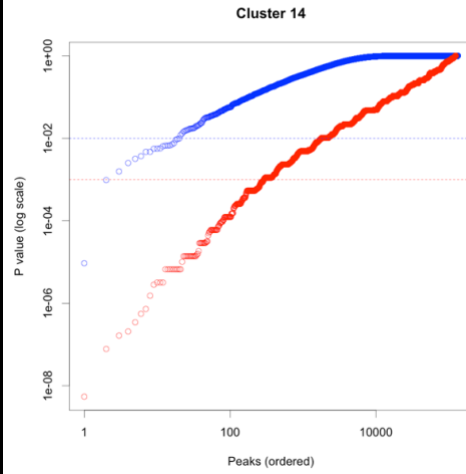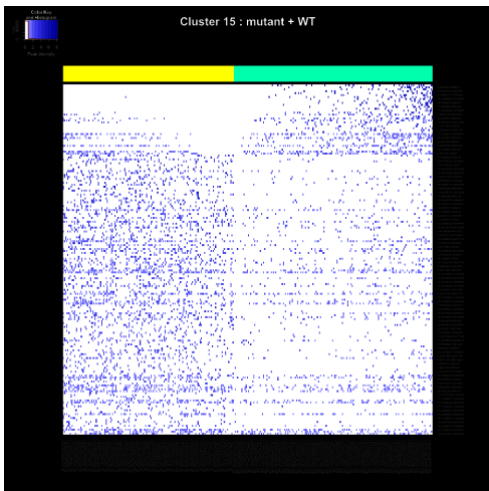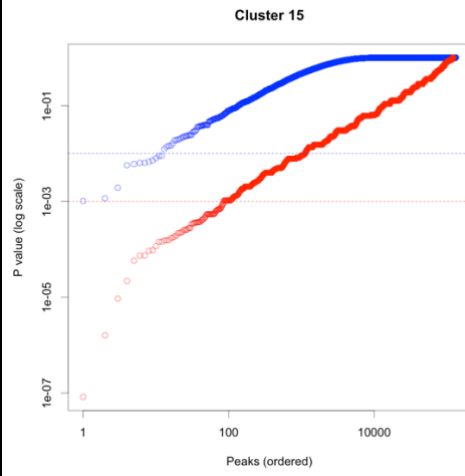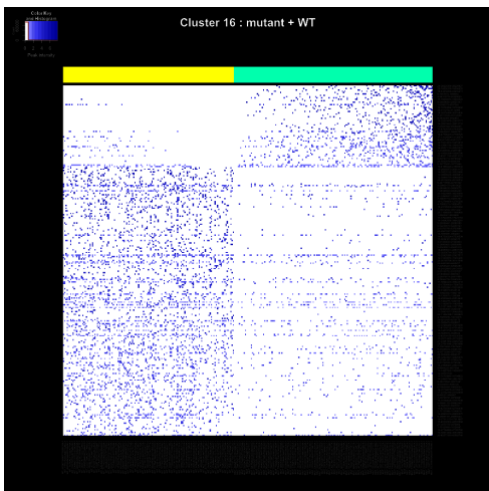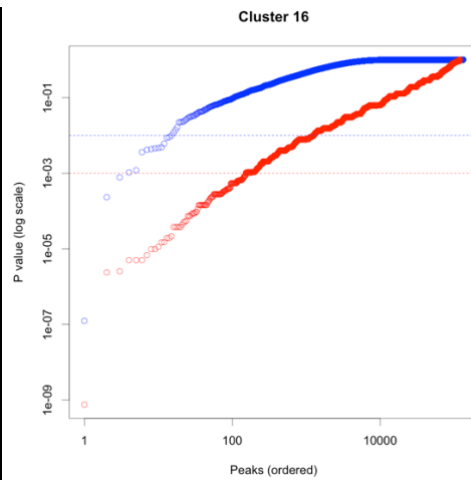

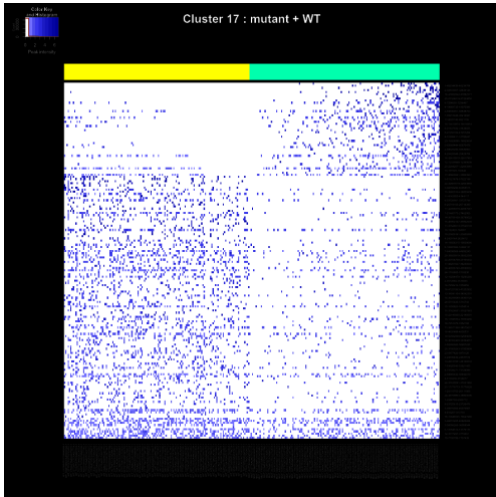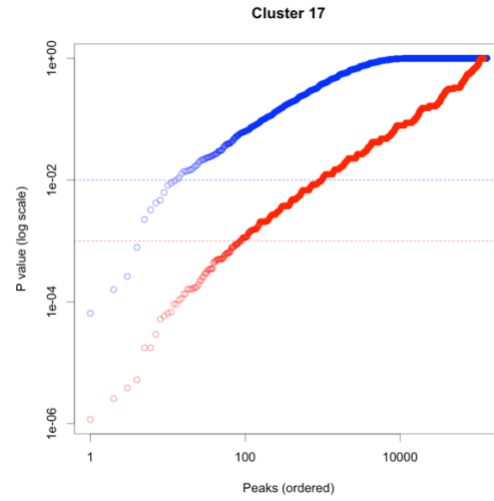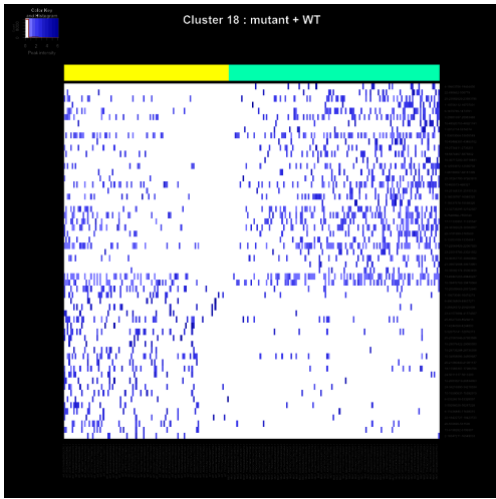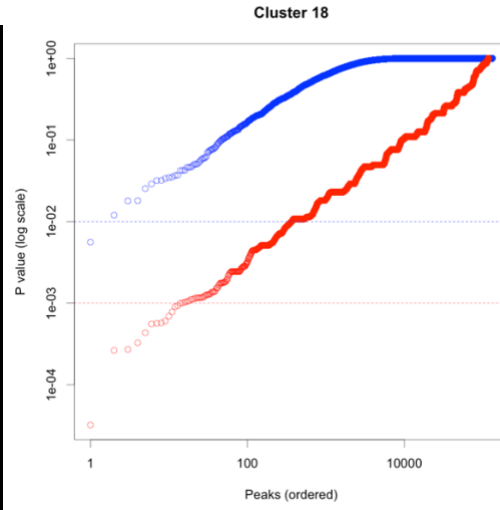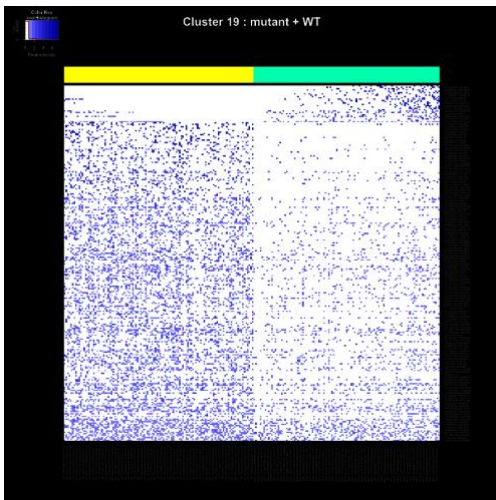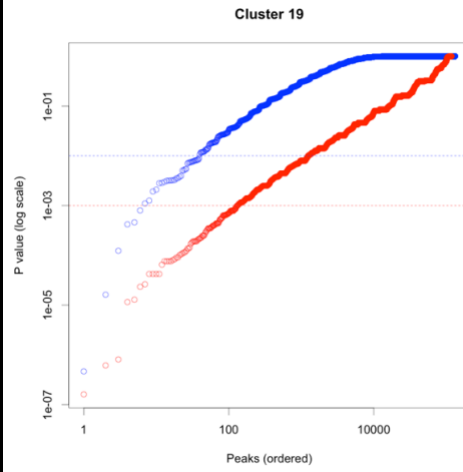

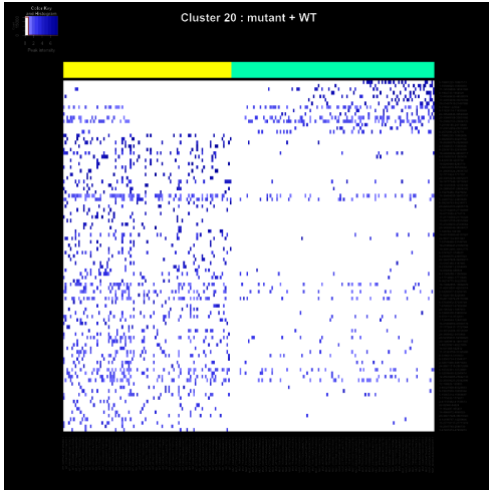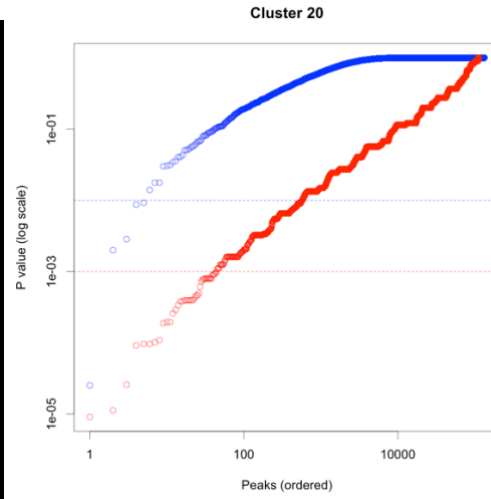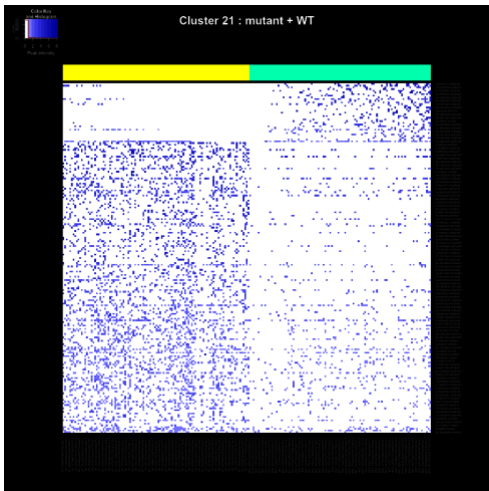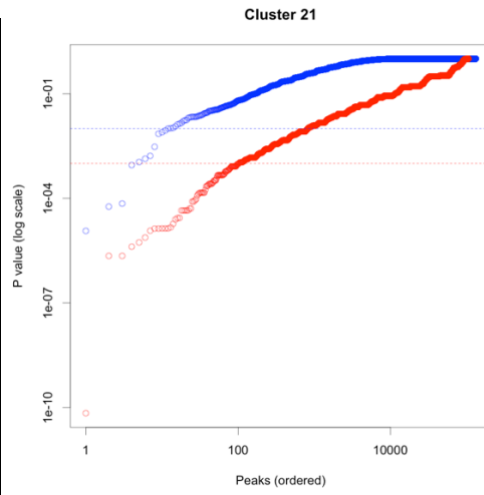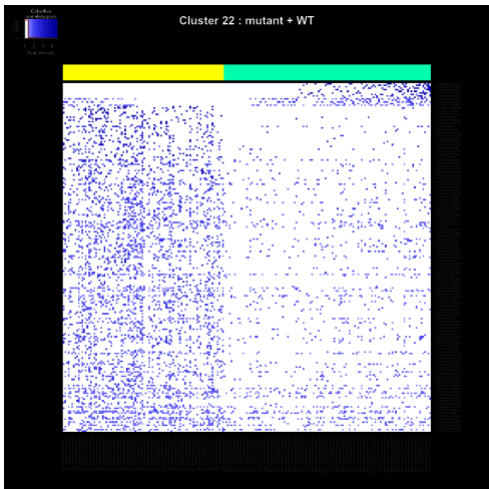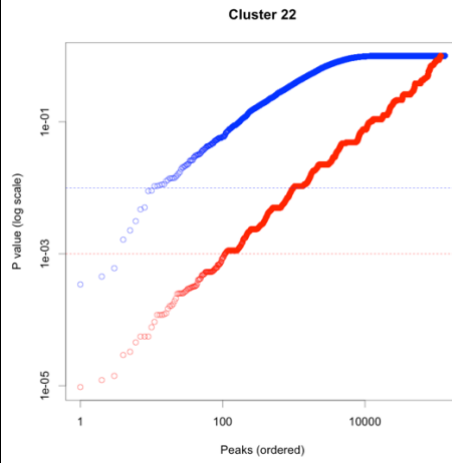



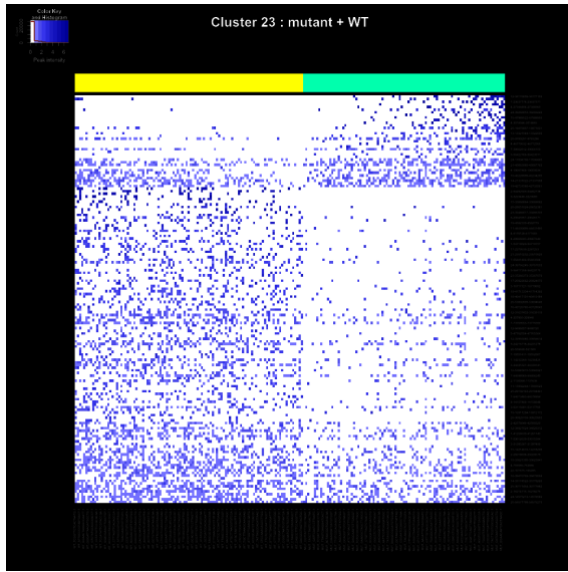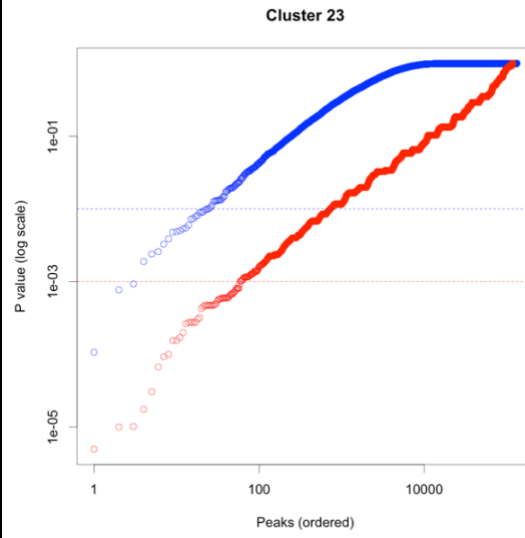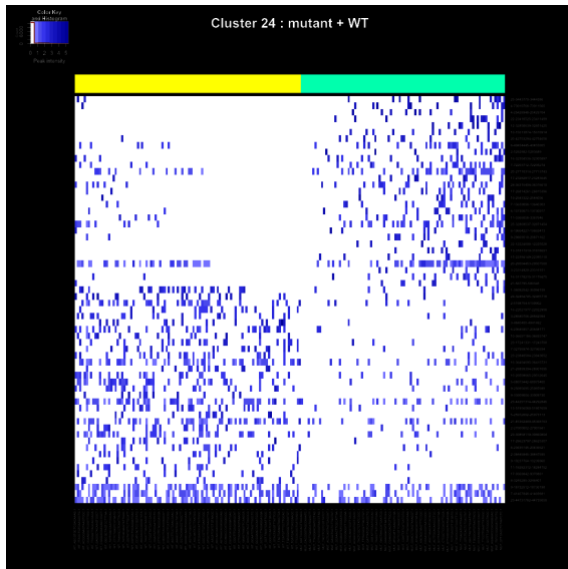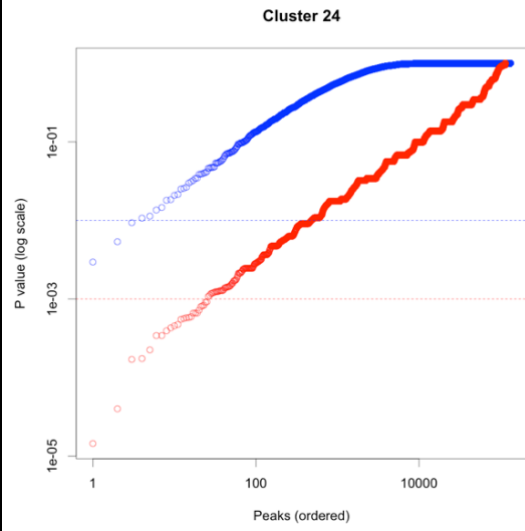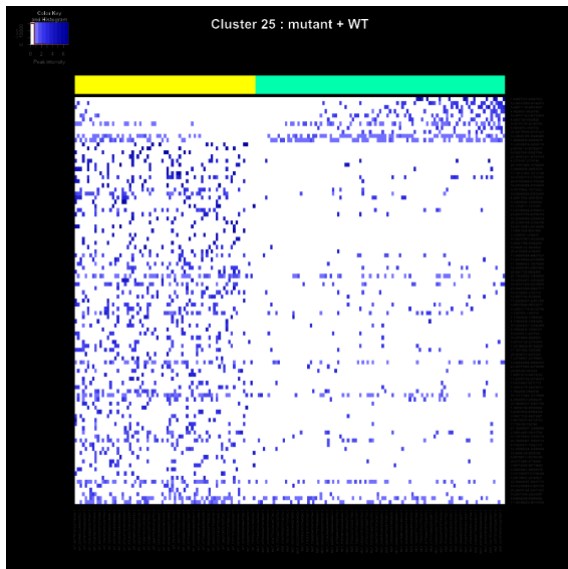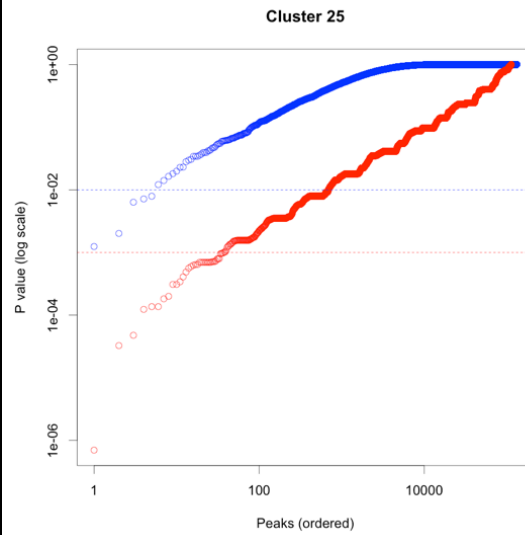

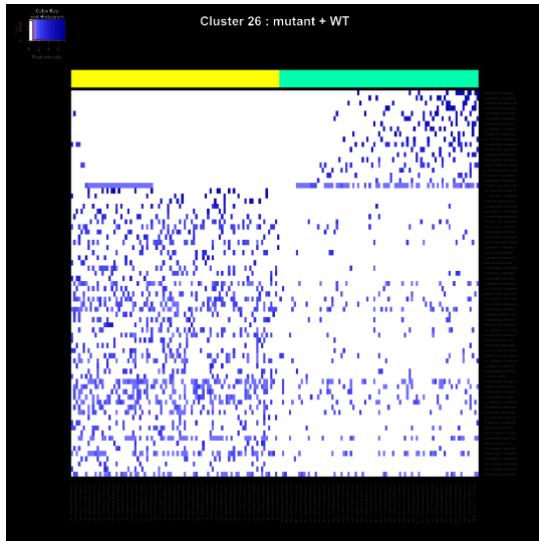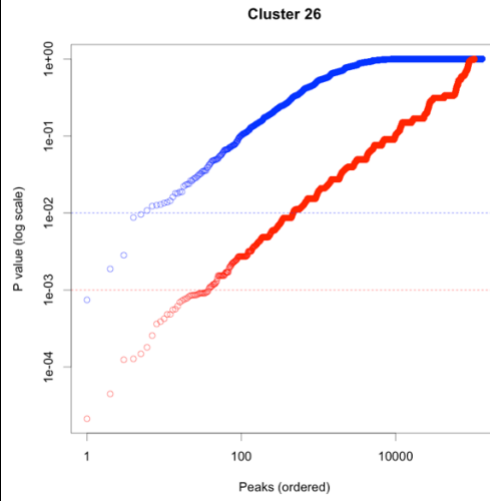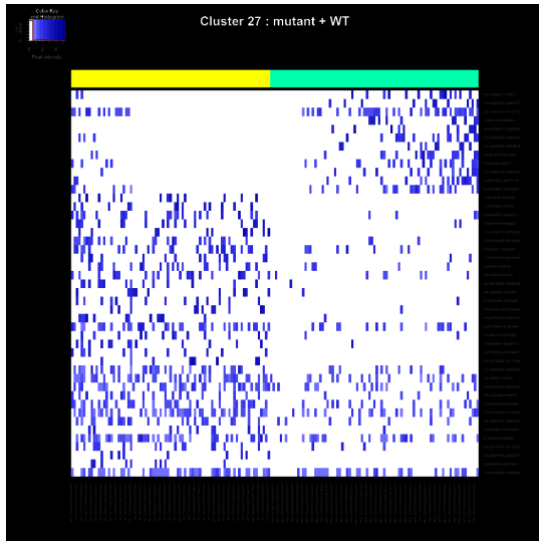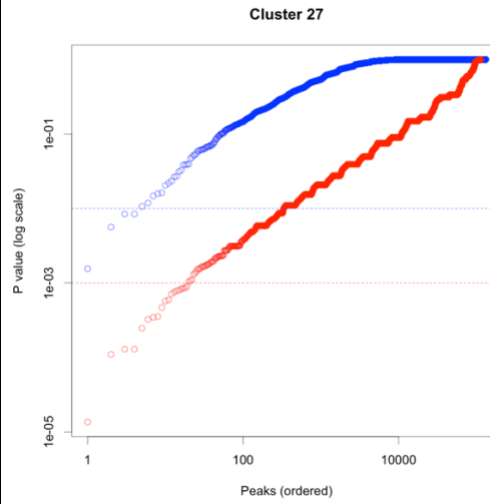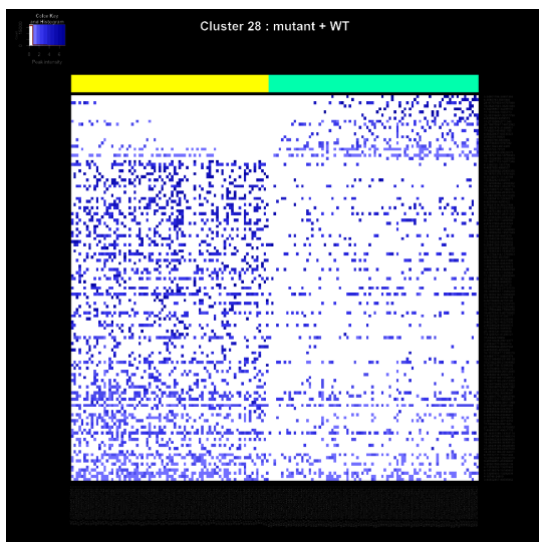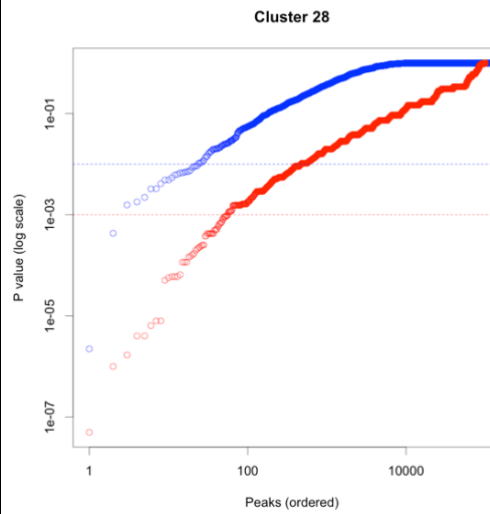

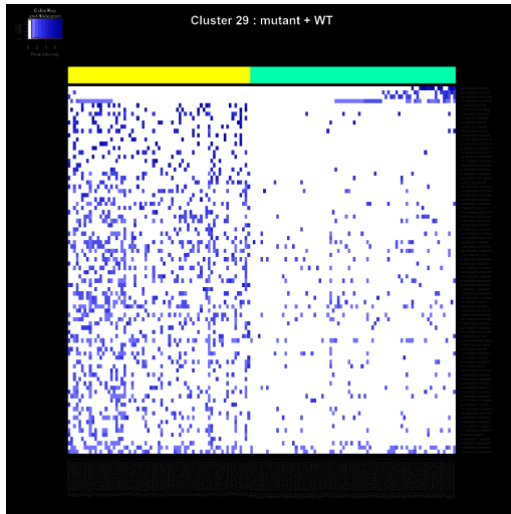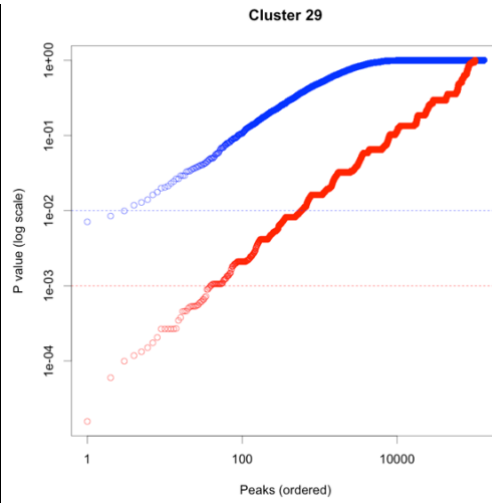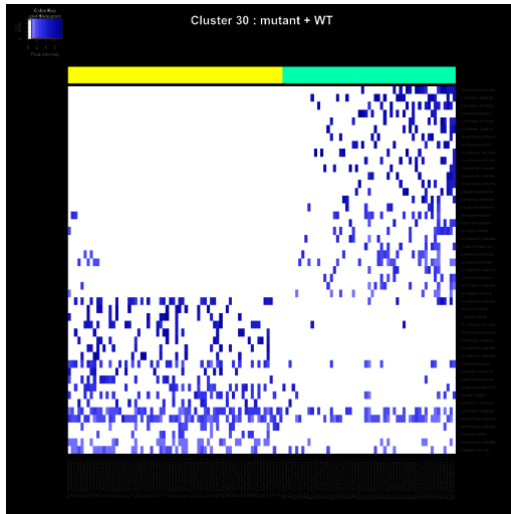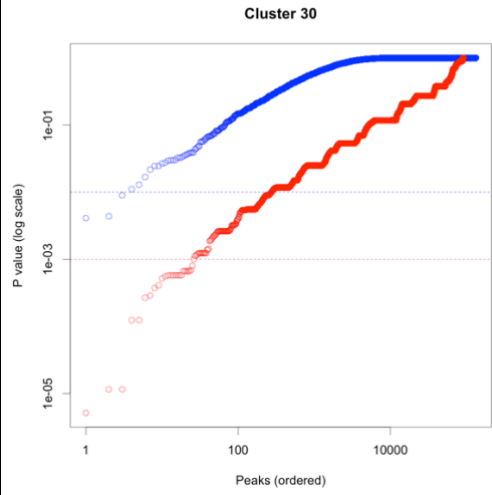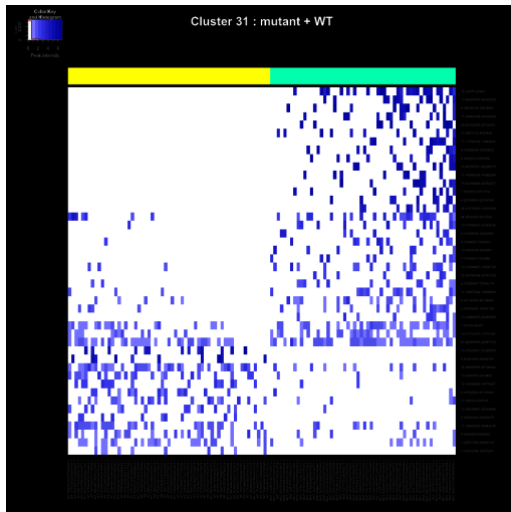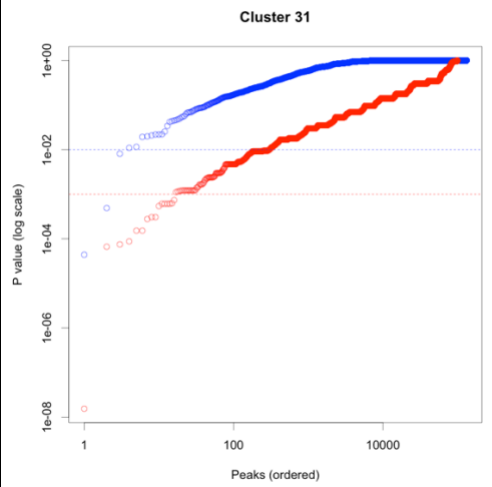

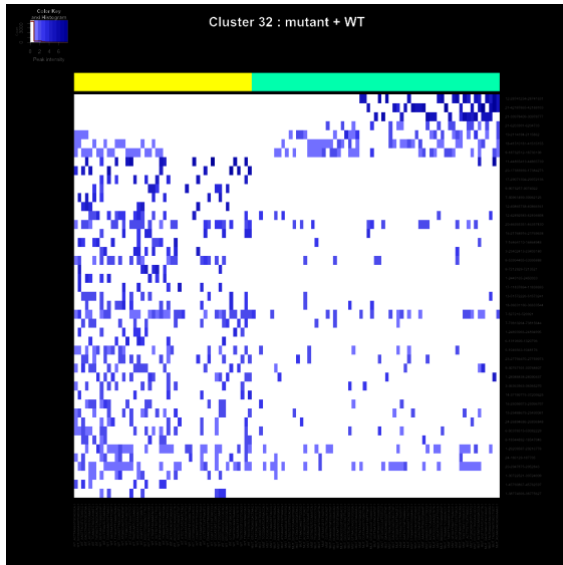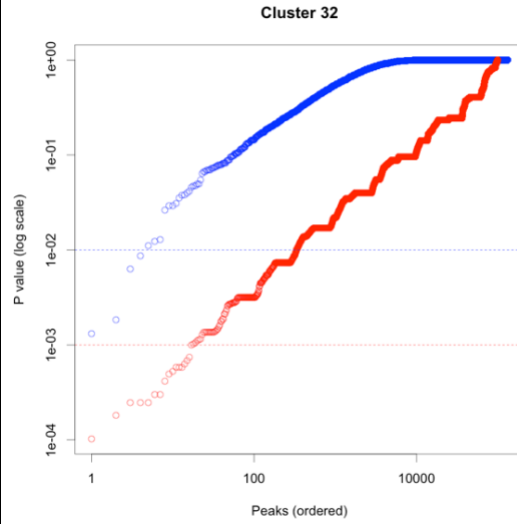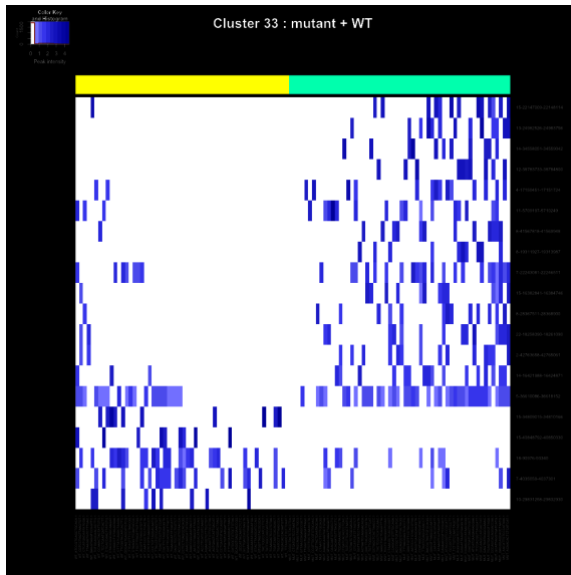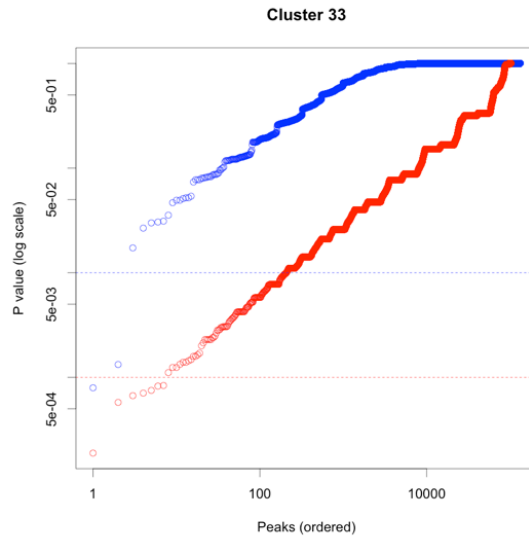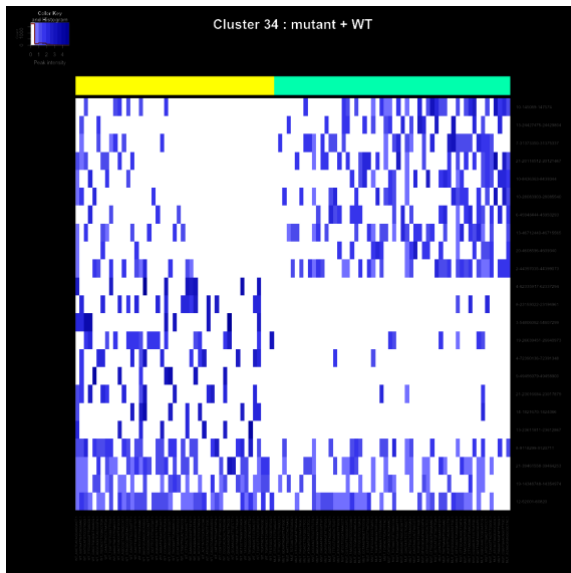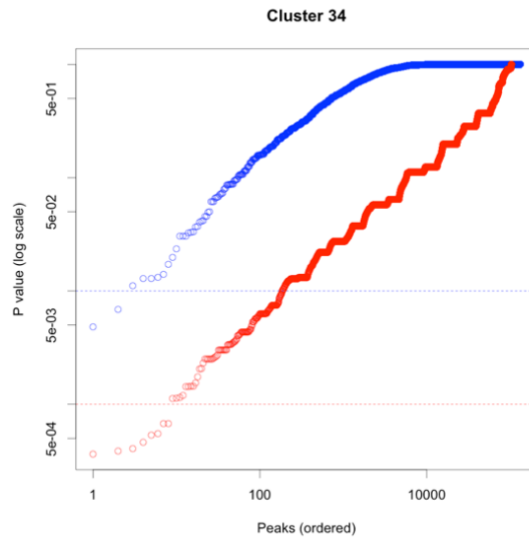



# Cluster 35

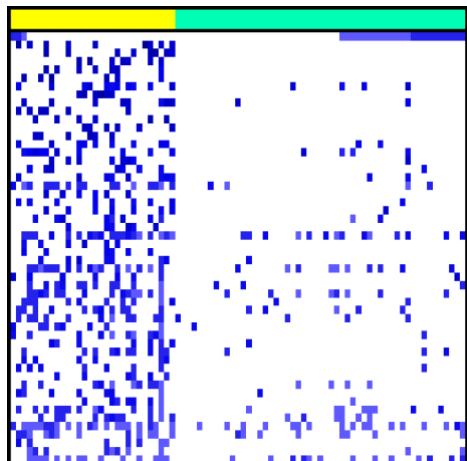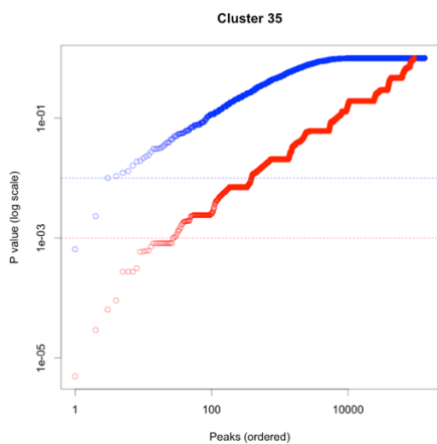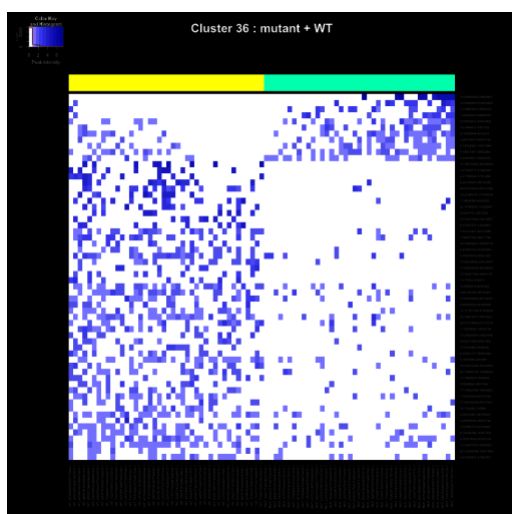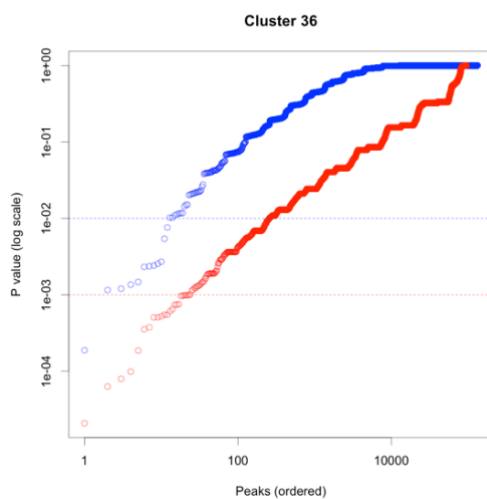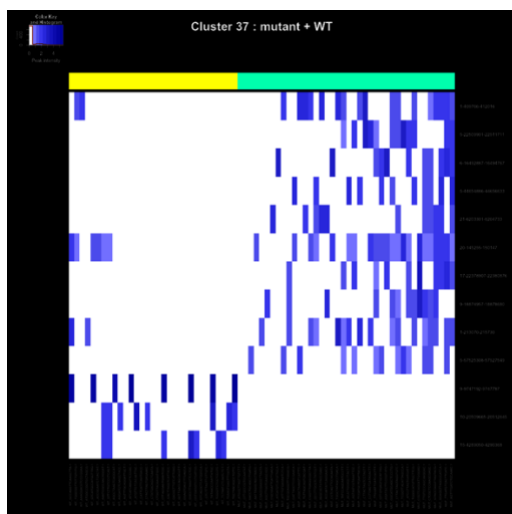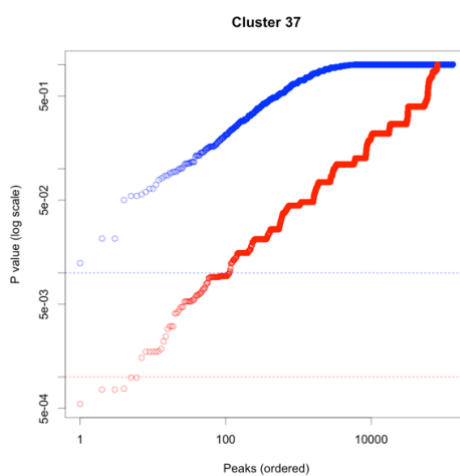

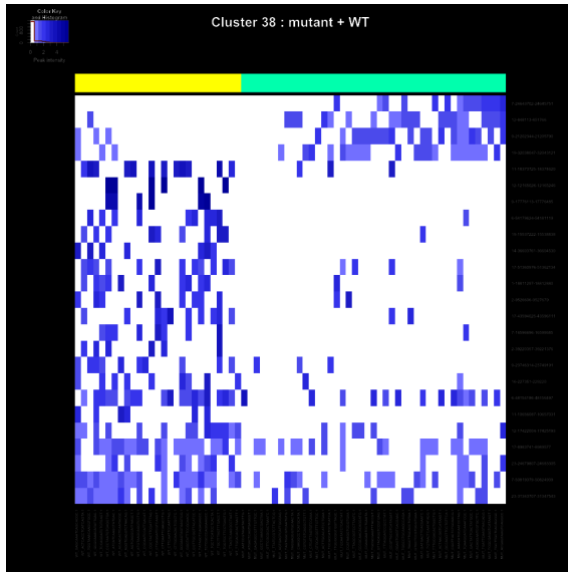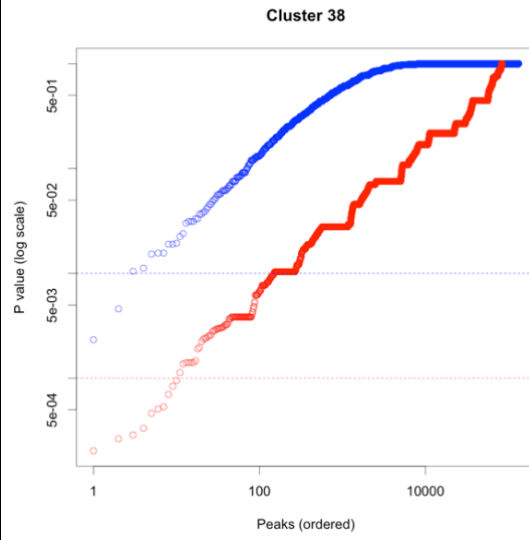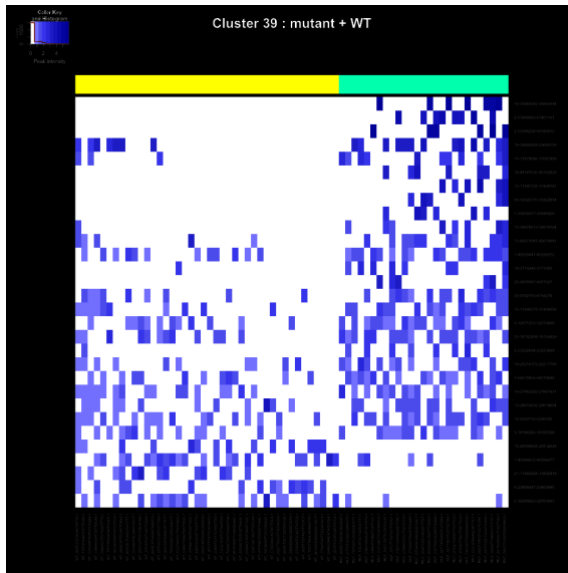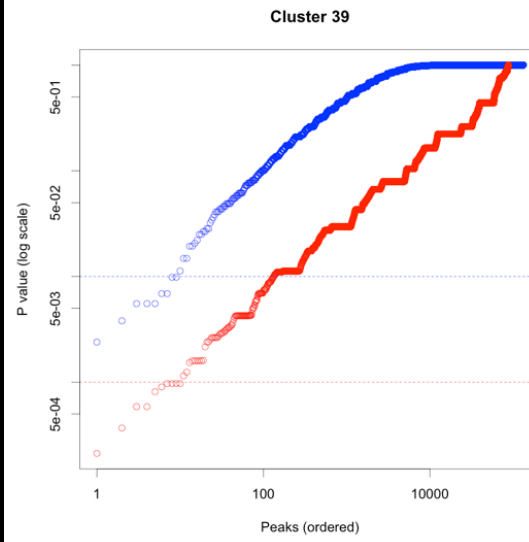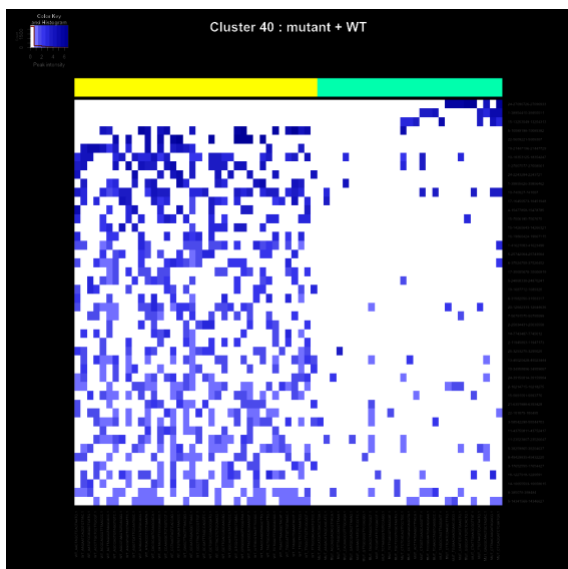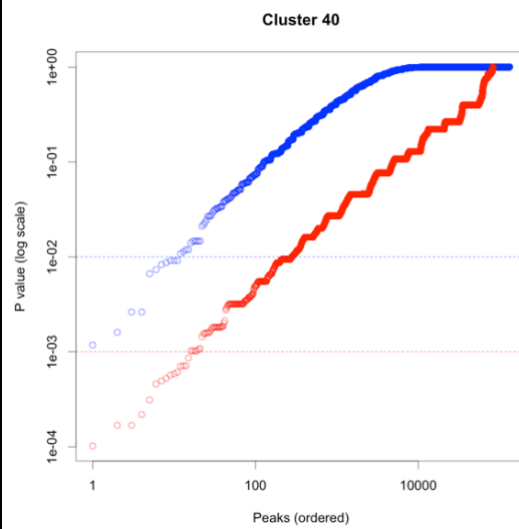

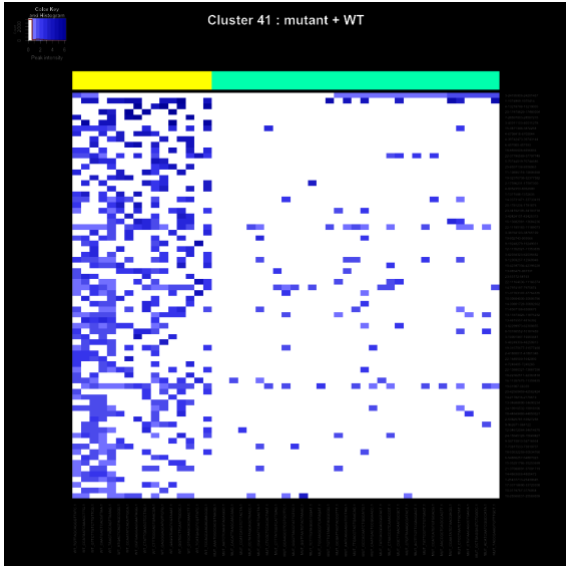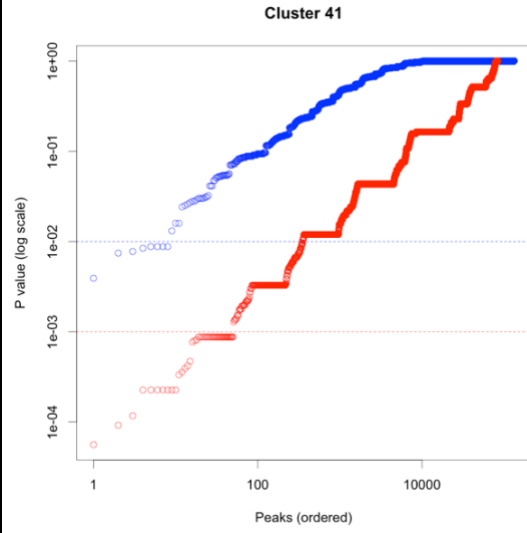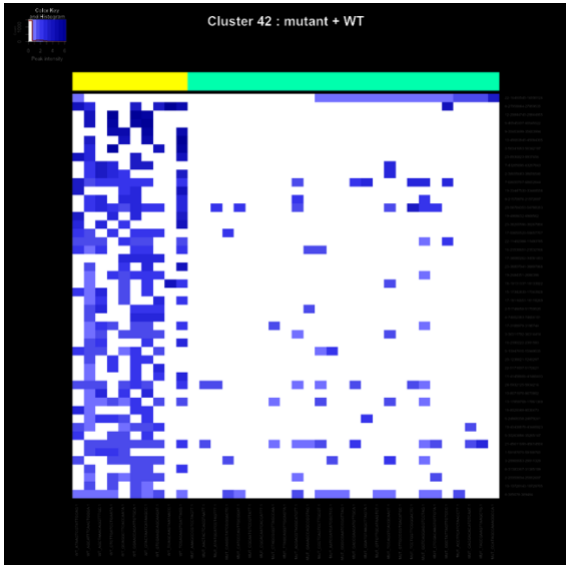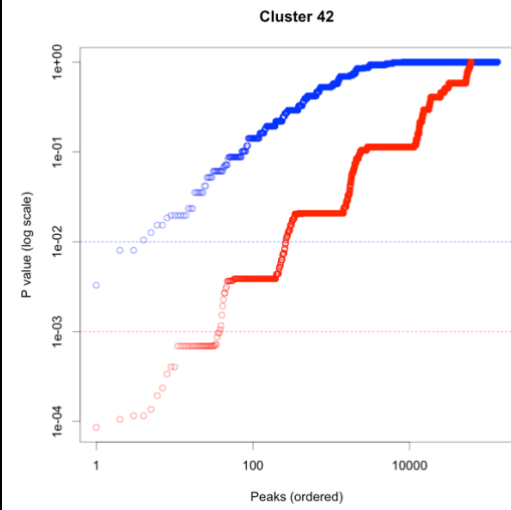

Supplement: supp8 [file elife-82249-supp8-v1.pdf]
