# Supplementary material for: linc-mipep and linc-wrb encode micropeptides that regulate chromatin accessibility in vertebrate-specific neural cells
Source: eLife. 2023 May 16;12:e82249. doi: 10.7554/eLife.82249 (PMC10188112; doi:10.7554/eLife.82249)
Supplement: Supplementary file 4. [file elife-82249-supp4.xlsx]

## Sheet: Contents
Supplementary Table 4: Bulk omni-ATAC-seq on WT or linc-mipep;linc-wrb mutant brains at 5 dpf (ZT4)
Sheet Name	Description
3wt_3mu_merged_p20_peaks	Called narrow peaks (significance cutoff at P = 10−20) of merged 5 dpf WT brains (n=10, N=3) and 5 dpf linc-mipep; linc-wrb mutant brains (n=10, N=3) omni-ATAC-seq effective reads
ATAC_PeaksDown	Omni-ATAC-seq peaks down in linc-mipep; linc-wrb mutant brains compared to WT brains at 5dpf
ATAC_PeaksUp	Omni-ATAC-seq peaks up in linc-mipep; linc-wrb mutant brains compared to WT brains at 5dpf
ATAC_PeaksUnaffected	Omni-ATAC-seq peaks unaffected in linc-mipep; linc-wrb mutant brains compared to WT brains at 5dpf
Genome tracks available at https://www.giraldezlab.org/data/tornini_et_al_2023_elife/

## Sheet: 3wt_3mu_merged_p20_peaks_chr_on
Called narrow peaks (significance cutoff at P = 10−20) of merged 5 dpf WT brains (n=10, N=3) and 5 dpf linc-mipep; linc-wrb mutant brains (n=10, N=3) omni-ATAC-seq effective reads
1	10003259	10003785	3wt_3mu_merged_p20_peak_866a	29328	.	48.6044	2932.83	2928.14	120
1	10003259	10003785	3wt_3mu_merged_p20_peak_866b	3809	.	11.7382	380.927	378.033	442
1	10015369	10015502	3wt_3mu_merged_p20_peak_867	977	.	13.0648	97.7853	95.4428	84
1	10018469	10018599	3wt_3mu_merged_p20_peak_868	2046	.	21.4882	204.673	202.04	64
1	10047702	10047798	3wt_3mu_merged_p20_peak_869	831	.	11.4703	83.1321	80.8517	51
1	10048398	10048622	3wt_3mu_merged_p20_peak_870	934	.	12.0999	93.4222	91.0975	69
1	10048953	10049046	3wt_3mu_merged_p20_peak_871	509	.	8.43999	50.9399	48.844	55
1	1005049	1005179	3wt_3mu_merged_p20_peak_153	1884	.	19.1909	188.494	185.895	75
1	10107121	10107553	3wt_3mu_merged_p20_peak_872	452	.	7.63335	45.2778	43.2258	68
1	10110109	10110210	3wt_3mu_merged_p20_peak_873	2457	.	21.4577	245.77	243.063	43
1	10110488	10110554	3wt_3mu_merged_p20_peak_874	372	.	6.3357	37.2887	35.3046	30
1	10125851	10126152	3wt_3mu_merged_p20_peak_875a	388	.	7.30395	38.8817	36.8819	21
1	10125851	10126152	3wt_3mu_merged_p20_peak_875b	1392	.	16.5625	139.214	136.735	123
1	10125851	10126152	3wt_3mu_merged_p20_peak_875c	552	.	9.05278	55.2421	53.1148	269
1	10126208	10126355	3wt_3mu_merged_p20_peak_876	1192	.	14.9165	119.286	116.866	85
1	10141952	10142080	3wt_3mu_merged_p20_peak_877	603	.	9.56715	60.3368	58.1767	87
1	1014748	1014913	3wt_3mu_merged_p20_peak_154	20455	.	55.764	2045.59	2041.51	83
1	10148977	10149115	3wt_3mu_merged_p20_peak_878	552	.	9.05278	55.2421	53.1148	70
1	10160850	10161053	3wt_3mu_merged_p20_peak_879a	708	.	10.5959	70.868	68.6476	75
1	10160850	10161053	3wt_3mu_merged_p20_peak_879b	242	.	5.55512	24.286	22.4498	184
1	10180978	10181044	3wt_3mu_merged_p20_peak_880	292	.	6.17235	29.2075	27.308	30
1	10196262	10196339	3wt_3mu_merged_p20_peak_881	416	.	7.61257	41.6523	39.628	31
1	10196532	10196635	3wt_3mu_merged_p20_peak_882	655	.	10.0815	65.5474	63.3563	63
1	10221543	10221624	3wt_3mu_merged_p20_peak_883	593	.	9.46427	59.3084	57.1547	42
1	10235286	10235418	3wt_3mu_merged_p20_peak_884	613	.	9.67002	61.3699	59.2034	46
1	10257828	10257908	3wt_3mu_merged_p20_peak_885	370	.	7.09821	37.0648	35.0819	39
1	10278063	10278215	3wt_3mu_merged_p20_peak_886	522	.	8.74417	52.2437	50.1369	27
1	10293366	10293433	3wt_3mu_merged_p20_peak_887	370	.	5.96122	37.0618	35.0819	29
1	10296953	10297162	3wt_3mu_merged_p20_peak_888	4610	.	30.5242	461.085	458.102	81
1	10297223	10297343	3wt_3mu_merged_p20_peak_889	780	.	9.15056	78.0715	75.8155	44
1	1029905	1029966	3wt_3mu_merged_p20_peak_155	666	.	10.1844	66.6029	64.4057	35
1	10305543	10305710	3wt_3mu_merged_p20_peak_890	11147	.	54.7162	1114.76	1111.27	84
1	10305836	10306039	3wt_3mu_merged_p20_peak_891a	430	.	6.12556	43.0392	41.0046	55
1	10305836	10306039	3wt_3mu_merged_p20_peak_891b	506	.	6.71951	50.6069	48.5127	169
1	10317942	10318359	3wt_3mu_merged_p20_peak_892a	4465	.	24.6951	446.582	443.616	95
1	10317942	10318359	3wt_3mu_merged_p20_peak_892b	5473	.	28.6116	547.328	544.262	331
1	10318503	10318610	3wt_3mu_merged_p20_peak_893	461	.	5.84138	46.2	44.1404	36
1	10320051	10320194	3wt_3mu_merged_p20_peak_894	493	.	6.05683	49.3598	47.274	43
1	10346088	10346164	3wt_3mu_merged_p20_peak_895	275	.	5.96661	27.5371	25.658	29
1	10347281	10347402	3wt_3mu_merged_p20_peak_896	1878	.	18.8903	187.882	185.284	58
1	10351399	10351520	3wt_3mu_merged_p20_peak_897	1724	.	18.5424	172.442	169.878	82
1	10351674	10351774	3wt_3mu_merged_p20_peak_898	446	.	7.72355	44.6612	42.6123	42
1	10353756	10353811	3wt_3mu_merged_p20_peak_899	473	.	8.2298	47.3483	45.2776	25
1	10378544	10378781	3wt_3mu_merged_p20_peak_900	6359	.	33.1209	635.943	632.798	122
1	10379110	10379216	3wt_3mu_merged_p20_peak_901	891	.	8.61224	89.1981	86.8914	69
1	10388284	10388474	3wt_3mu_merged_p20_peak_902	1060	.	13.7849	106.024	103.65	139
1	10403783	10403860	3wt_3mu_merged_p20_peak_903	244	.	5.39879	24.4202	22.583	23
1	10406770	10406838	3wt_3mu_merged_p20_peak_904	313	.	5.9772	31.3227	29.401	40
1	10406900	10407210	3wt_3mu_merged_p20_peak_905a	371	.	6.39698	37.1492	35.1658	66
1	10406900	10407210	3wt_3mu_merged_p20_peak_905b	1041	.	11.9232	104.122	101.756	231
1	10411876	10411971	3wt_3mu_merged_p20_peak_906	389	.	6.77694	38.9493	36.9492	39
1	10415943	10416126	3wt_3mu_merged_p20_peak_907	1430	.	16.8711	143.03	140.539	48
1	1041783	1041994	3wt_3mu_merged_p20_peak_156	2306	.	21.3609	230.61	227.929	43
1	1042281	1042477	3wt_3mu_merged_p20_peak_157a	343	.	6.46891	34.3837	32.4298	58
1	1042281	1042477	3wt_3mu_merged_p20_peak_157b	255	.	5.493	25.5824	23.7315	151
1	10425351	10425512	3wt_3mu_merged_p20_peak_908	366	.	6.58021	36.6743	34.6971	52
1	10427867	10427977	3wt_3mu_merged_p20_peak_909	387	.	6.11312	38.7222	36.7265	37
1	10432451	10432597	3wt_3mu_merged_p20_peak_910	1765	.	15.7457	176.573	173.999	95
1	10432785	10432962	3wt_3mu_merged_p20_peak_911	1484	.	14.3697	148.447	145.942	58
1	10440230	10440287	3wt_3mu_merged_p20_peak_912	281	.	6.01658	28.1552	26.2717	29
1	10442083	10442326	3wt_3mu_merged_p20_peak_913	492	.	8.29105	49.2149	47.1324	104
1	10444994	10445300	3wt_3mu_merged_p20_peak_914a	773	.	11.2131	77.3906	75.1371	116
1	10444994	10445300	3wt_3mu_merged_p20_peak_914b	492	.	8.43555	49.2908	47.2054	269
1	10457575	10457657	3wt_3mu_merged_p20_peak_915	818	.	11.6246	81.8187	79.5442	46
1	10463748	10463824	3wt_3mu_merged_p20_peak_916	343	.	6.78959	34.3862	32.4298	38
1	10473555	10473746	3wt_3mu_merged_p20_peak_917	27604	.	64.7718	2760.44	2755.88	108
1	10475245	10475367	3wt_3mu_merged_p20_peak_918	1177	.	7.43023	117.756	115.342	39
1	10489587	10489824	3wt_3mu_merged_p20_peak_919a	359	.	6.72638	35.9613	33.9918	31
1	10489587	10489824	3wt_3mu_merged_p20_peak_919b	306	.	6.10369	30.6229	28.7098	202
1	10503266	10503386	3wt_3mu_merged_p20_peak_920	1012	.	13.3734	101.296	98.94	48
1	10507196	10507283	3wt_3mu_merged_p20_peak_921	483	.	8.33268	48.3169	46.2388	41
1	10519391	10519483	3wt_3mu_merged_p20_peak_922	492	.	8.43555	49.2908	47.2054	37
1	10519536	10519687	3wt_3mu_merged_p20_peak_923	1217	.	15.1223	121.737	119.309	93
1	10527604	10527698	3wt_3mu_merged_p20_peak_924	473	.	8.2298	47.3483	45.2776	56
1	10533357	10533570	3wt_3mu_merged_p20_peak_925a	483	.	8.33268	48.3169	46.2388	60
1	10533357	10533570	3wt_3mu_merged_p20_peak_925b	532	.	8.84704	53.2382	51.1244	150
1	10548645	10548764	3wt_3mu_merged_p20_peak_926	502	.	8.53842	50.2699	48.1773	71
1	10566131	10566290	3wt_3mu_merged_p20_peak_927	513	.	8.41007	51.3519	49.2517	33
1	10568789	10568945	3wt_3mu_merged_p20_peak_928	1864	.	17.9492	186.481	183.886	85
1	10571805	10571909	3wt_3mu_merged_p20_peak_929	2734	.	24.4034	273.46	270.708	43
1	10582103	10582217	3wt_3mu_merged_p20_peak_930	624	.	9.77289	62.4075	60.2348	66
1	10589660	10589713	3wt_3mu_merged_p20_peak_931	397	.	7.40682	39.7993	37.7912	23
1	10616509	10616792	3wt_3mu_merged_p20_peak_932	2117	.	14.6634	211.797	209.15	144
1	10616896	10617049	3wt_3mu_merged_p20_peak_933	3656	.	21.1986	365.67	362.794	77
1	10647030	10647116	3wt_3mu_merged_p20_peak_934	897	.	12.3447	89.7138	87.4042	35
1	1065925	1065994	3wt_3mu_merged_p20_peak_158	209	.	5.07978	20.9113	19.1294	30
1	10669275	10669337	3wt_3mu_merged_p20_peak_935	613	.	9.67002	61.3699	59.2034	29
1	1068004	1068092	3wt_3mu_merged_p20_peak_159	388	.	6.85283	38.8343	36.838	45
1	10683661	10684178	3wt_3mu_merged_p20_peak_936a	3511	.	23.3918	351.118	348.26	96
1	10683661	10684178	3wt_3mu_merged_p20_peak_936b	1799	.	14.6829	179.94	177.359	277
1	10683661	10684178	3wt_3mu_merged_p20_peak_936c	492	.	6.56405	49.202	47.1195	465
1	10684289	10684346	3wt_3mu_merged_p20_peak_937	264	.	4.6658	26.4889	24.6265	19
1	1068895	1068980	3wt_3mu_merged_p20_peak_160	284	.	5.52476	28.433	26.5432	27
1	10706306	10706372	3wt_3mu_merged_p20_peak_938	265	.	4.67057	26.5163	24.6537	37
1	10706548	10706831	3wt_3mu_merged_p20_peak_939a	2602	.	18.8505	260.218	257.488	65
1	10706548	10706831	3wt_3mu_merged_p20_peak_939b	3888	.	24.9521	388.849	385.945	171
1	10708639	10708717	3wt_3mu_merged_p20_peak_940	1387	.	11.6347	138.705	136.227	34
1	10713697	10714008	3wt_3mu_merged_p20_peak_941	6306	.	32.7213	630.689	627.548	125
1	10719958	10720306	3wt_3mu_merged_p20_peak_942	7643	.	28.447	764.365	761.118	186
1	10720436	10720557	3wt_3mu_merged_p20_peak_943	1247	.	8.52629	124.741	122.305	63
1	10749918	10750394	3wt_3mu_merged_p20_peak_944a	851	.	8.28919	85.1958	82.9059	88
1	10749918	10750394	3wt_3mu_merged_p20_peak_944b	812	.	8.04018	81.2331	78.9619	182
1	10749918	10750394	3wt_3mu_merged_p20_peak_944c	3243	.	19.6231	324.361	321.537	343
1	10750525	10750704	3wt_3mu_merged_p20_peak_945	1251	.	10.5057	125.167	122.729	125
1	1075242	1075347	3wt_3mu_merged_p20_peak_161	205	.	4.74155	20.5552	18.7763	2
1	10783516	10783605	3wt_3mu_merged_p20_peak_946	1012	.	13.3734	101.296	98.94	40
1	10820612	10820742	3wt_3mu_merged_p20_peak_947	655	.	10.0815	65.5474	63.3563	68
1	10863651	10863716	3wt_3mu_merged_p20_peak_948	258	.	5.76086	25.8963	24.0382	21
1	1086969	1087130	3wt_3mu_merged_p20_peak_162	863	.	12.0361	86.308	84.0132	76
1	10884372	10884672	3wt_3mu_merged_p20_peak_949a	3357	.	18.4098	335.787	332.949	66
1	10884372	10884672	3wt_3mu_merged_p20_peak_949b	389	.	4.95201	38.9475	36.9474	198
1	10885224	10885431	3wt_3mu_merged_p20_peak_950	8608	.	36.0858	860.816	857.498	101
1	10903835	10903913	3wt_3mu_merged_p20_peak_951	331	.	6.48417	33.1149	31.1739	24
1	10904096	10904342	3wt_3mu_merged_p20_peak_952	2667	.	25.4391	266.776	264.035	78
1	10908547	10908742	3wt_3mu_merged_p20_peak_953	606	.	9.23173	60.6186	58.4573	130
1	109617	109931	3wt_3mu_merged_p20_peak_34a	462	.	6.8546	46.2968	44.2367	23
1	109617	109931	3wt_3mu_merged_p20_peak_34b	7108	.	44.1459	710.839	707.634	119
1	10964080	10964224	3wt_3mu_merged_p20_peak_954	851	.	11.9332	85.18	82.8902	78
1	10966534	10966610	3wt_3mu_merged_p20_peak_955	326	.	6.58384	32.6329	30.6949	43
1	10993503	10993590	3wt_3mu_merged_p20_peak_956	425	.	7.71544	42.5876	40.5553	44
1	11038625	11038737	3wt_3mu_merged_p20_peak_957	397	.	7.40682	39.7993	37.7912	57
1	11056665	11056888	3wt_3mu_merged_p20_peak_958	1587	.	14.3254	158.72	156.189	83
1	11057390	11057442	3wt_3mu_merged_p20_peak_959	245	.	4.67329	24.551	22.7128	16
1	11057522	11057708	3wt_3mu_merged_p20_peak_960	1079	.	10.9696	107.951	105.571	107
1	11057826	11057906	3wt_3mu_merged_p20_peak_961	1186	.	11.6364	118.645	116.228	35
1	11064	11120	3wt_3mu_merged_p20_peak_2	370	.	3.86093	37.0346	35.0553	28
1	11107376	11107487	3wt_3mu_merged_p20_peak_962	2070	.	21.809	207.047	204.409	61
1	11107644	11107720	3wt_3mu_merged_p20_peak_963	1024	.	13.4763	102.473	100.113	44
1	1111480	1111676	3wt_3mu_merged_p20_peak_163a	229	.	5.30959	22.9244	21.1092	22
1	1111480	1111676	3wt_3mu_merged_p20_peak_163b	307	.	6.24576	30.7973	28.883	118
1	11121726	11121791	3wt_3mu_merged_p20_peak_964	1084	.	13.9907	108.407	106.024	35
1	11132190	11132319	3wt_3mu_merged_p20_peak_965	1159	.	14.1798	115.958	113.55	64
1	11132581	11132673	3wt_3mu_merged_p20_peak_966	390	.	7.11506	39.0516	37.0509	33
1	11132858	11132967	3wt_3mu_merged_p20_peak_967	527	.	8.60943	52.7726	50.6633	53
1	1113340	1113481	3wt_3mu_merged_p20_peak_164	447	.	7.62771	44.7471	42.6978	78
1	11162283	11162395	3wt_3mu_merged_p20_peak_968	603	.	9.56715	60.3368	58.1767	56
1	11167779	11168032	3wt_3mu_merged_p20_peak_969	2760	.	20.59	276.083	273.328	153
1	11171988	11172080	3wt_3mu_merged_p20_peak_970	477	.	6.69311	47.7024	45.6299	25
1	11172151	11172233	3wt_3mu_merged_p20_peak_971	269	.	4.86173	26.9135	25.0433	48
1	11172446	11172635	3wt_3mu_merged_p20_peak_972a	408	.	6.10966	40.8236	38.8068	40
1	11172446	11172635	3wt_3mu_merged_p20_peak_972b	591	.	7.5773	59.1147	56.9639	103
1	11178769	11178896	3wt_3mu_merged_p20_peak_973	283	.	6.06948	28.3687	26.4793	67
1	11184518	11184775	3wt_3mu_merged_p20_peak_974	2011	.	21.1209	201.171	198.545	87
1	11214175	11214708	3wt_3mu_merged_p20_peak_975a	2563	.	16.3113	256.346	253.622	198
1	11214175	11214708	3wt_3mu_merged_p20_peak_975b	2714	.	16.9657	271.443	268.695	317
1	11214175	11214708	3wt_3mu_merged_p20_peak_975c	894	.	8.35165	89.4364	87.129	483
1	1121431	1121648	3wt_3mu_merged_p20_peak_165a	1316	.	15.9452	131.657	129.199	66
1	1121431	1121648	3wt_3mu_merged_p20_peak_165b	1430	.	16.8711	143.03	140.539	129
1	11217026	11217121	3wt_3mu_merged_p20_peak_976	280	.	4.49517	28.0306	26.148	27
1	11222774	11222956	3wt_3mu_merged_p20_peak_977	644	.	9.97864	64.4963	62.3112	103
1	11224597	11224752	3wt_3mu_merged_p20_peak_978	492	.	8.43555	49.2908	47.2054	59
1	11234982	11235067	3wt_3mu_merged_p20_peak_979	267	.	5.86373	26.713	24.8442	50
1	11238957	11239017	3wt_3mu_merged_p20_peak_980	309	.	6.3781	30.9063	28.9874	39
1	11262292	11262367	3wt_3mu_merged_p20_peak_981	343	.	6.78959	34.3862	32.4298	32
1	11262690	11262749	3wt_3mu_merged_p20_peak_982	219	.	5.2465	21.9303	20.1286	21
1	11272803	11272879	3wt_3mu_merged_p20_peak_983	361	.	6.99533	36.1656	34.1914	32
1	11284279	11284374	3wt_3mu_merged_p20_peak_984	655	.	10.0815	65.5474	63.3563	55
1	11288116	11288237	3wt_3mu_merged_p20_peak_985	425	.	7.71544	42.5876	40.5553	44
1	11291231	11291287	3wt_3mu_merged_p20_peak_986	317	.	6.48097	31.7662	29.8377	25
1	11296988	11297056	3wt_3mu_merged_p20_peak_987	204	.	5.04075	20.4014	18.6238	0
1	11300550	11300621	3wt_3mu_merged_p20_peak_988	242	.	5.55512	24.286	22.4498	32
1	11316653	11316713	3wt_3mu_merged_p20_peak_989	250	.	5.65799	25.0873	23.24	30
1	11334649	11334803	3wt_3mu_merged_p20_peak_990	863	.	12.0361	86.308	84.0132	75
1	11357	11412	3wt_3mu_merged_p20_peak_3	433	.	4.1482	43.3984	41.3618	27
1	1137401	1137481	3wt_3mu_merged_p20_peak_166	593	.	9.46427	59.3084	57.1547	32
1	11378320	11378397	3wt_3mu_merged_p20_peak_991	250	.	5.65799	25.0873	23.24	23
1	11397372	11397501	3wt_3mu_merged_p20_peak_992	335	.	6.68672	33.5063	31.559	36
1	11405003	11405070	3wt_3mu_merged_p20_peak_993	343	.	6.78959	34.3862	32.4298	28
1	11405188	11405278	3wt_3mu_merged_p20_peak_994	326	.	6.58384	32.6329	30.6949	55
1	11412207	11412455	3wt_3mu_merged_p20_peak_995	3693	.	29.0542	369.32	366.439	121
1	11414309	11414372	3wt_3mu_merged_p20_peak_996	335	.	6.17692	33.5032	31.559	33
1	11428294	11428576	3wt_3mu_merged_p20_peak_997a	752	.	11.0074	75.2002	72.9574	85
1	11428294	11428576	3wt_3mu_merged_p20_peak_997b	234	.	5.45224	23.4927	21.6677	222
1	11433543	11433652	3wt_3mu_merged_p20_peak_998	444	.	7.92119	44.4752	42.4273	62
1	11445986	11446090	3wt_3mu_merged_p20_peak_999	492	.	8.43555	49.2908	47.2054	38
1	11452504	11452792	3wt_3mu_merged_p20_peak_1000a	361	.	6.99533	36.1656	34.1914	91
1	11452504	11452792	3wt_3mu_merged_p20_peak_1000b	317	.	6.48097	31.7662	29.8377	264
1	11496461	11496605	3wt_3mu_merged_p20_peak_1001	1214	.	12.9457	121.43	119.004	61
1	11498961	11499133	3wt_3mu_merged_p20_peak_1002	784	.	10.0988	78.4898	76.2324	110
1	11506563	11506629	3wt_3mu_merged_p20_peak_1003	379	.	4.69491	37.9284	35.9405	38
1	11506845	11506931	3wt_3mu_merged_p20_peak_1004	439	.	5.05129	43.9835	41.941	51
1	11507496	11507561	3wt_3mu_merged_p20_peak_1005	301	.	4.12828	30.1968	28.2866	34
1	11508483	11508578	3wt_3mu_merged_p20_peak_1006	646	.	6.12268	64.6837	62.4978	45
1	11509083	11509276	3wt_3mu_merged_p20_peak_1007	11042	.	39.2703	1104.22	1100.74	73
1	11525348	11525405	3wt_3mu_merged_p20_peak_1008	283	.	6.06948	28.3687	26.4793	25
1	11525537	11525713	3wt_3mu_merged_p20_peak_1009	752	.	11.0074	75.2002	72.9574	105
1	11525952	11526028	3wt_3mu_merged_p20_peak_1010	502	.	8.53842	50.2699	48.1773	37
1	11532891	11532992	3wt_3mu_merged_p20_peak_1011	562	.	9.15566	56.2515	54.1174	49
1	11535739	11535808	3wt_3mu_merged_p20_peak_1012	407	.	7.5097	40.7229	38.7066	36
1	11548536	11548616	3wt_3mu_merged_p20_peak_1013	250	.	5.65799	25.0873	23.24	35
1	11551010	11551240	3wt_3mu_merged_p20_peak_1014	473	.	8.2298	47.3483	45.2776	151
1	1155630	1155822	3wt_3mu_merged_p20_peak_167	697	.	10.493	69.7953	67.5807	110
1	11570510	11570701	3wt_3mu_merged_p20_peak_1015	1168	.	14.7108	116.847	114.436	88
1	11583996	11584052	3wt_3mu_merged_p20_peak_1016	388	.	7.30395	38.8817	36.8819	42
1	11598692	11598774	3wt_3mu_merged_p20_peak_1017	1072	.	13.8878	107.214	104.836	42
1	11610256	11610346	3wt_3mu_merged_p20_peak_1018	512	.	8.64129	51.2542	49.1545	31
1	1162753	1162812	3wt_3mu_merged_p20_peak_168	292	.	6.17235	29.2075	27.308	46
1	11675017	11675182	3wt_3mu_merged_p20_peak_1019	2408	.	24.2779	240.9	238.201	70
1	11681955	11682077	3wt_3mu_merged_p20_peak_1020	1156	.	14.6079	115.632	113.225	45
1	11689253	11689313	3wt_3mu_merged_p20_peak_1021	407	.	5.62479	40.7309	38.7146	34
1	11689493	11689686	3wt_3mu_merged_p20_peak_1022	10259	.	47.1134	1025.94	1022.51	99
1	11690156	11690209	3wt_3mu_merged_p20_peak_1023	350	.	5.15431	35.0257	33.0654	39
1	11705982	11706090	3wt_3mu_merged_p20_peak_1024	1417	.	16.7682	141.755	139.268	50
1	11711399	11711476	3wt_3mu_merged_p20_peak_1025	300	.	6.27523	30.0534	28.1441	28
1	11725657	11725714	3wt_3mu_merged_p20_peak_1026	741	.	10.9045	74.111	71.8737	27
1	11734	11791	3wt_3mu_merged_p20_peak_4	876	.	6.02212	87.628	85.3277	27
1	11739183	11739285	3wt_3mu_merged_p20_peak_1027	1430	.	16.8711	143.03	140.539	36
1	11778340	11778545	3wt_3mu_merged_p20_peak_1028	4508	.	27.6943	450.854	447.882	109
1	11785508	11785563	3wt_3mu_merged_p20_peak_1029	399	.	6.7948	39.9573	37.9483	26
1	11790315	11790541	3wt_3mu_merged_p20_peak_1030	566	.	6.9395	56.6356	54.4999	103
1	11794077	11794298	3wt_3mu_merged_p20_peak_1031	1415	.	13.7006	141.599	139.113	62
1	11794357	11794469	3wt_3mu_merged_p20_peak_1032	783	.	9.19574	78.3349	76.078	61
1	11794665	11794784	3wt_3mu_merged_p20_peak_1033	325	.	5.48941	32.5115	30.5781	30
1	11800937	11801112	3wt_3mu_merged_p20_peak_1034a	552	.	9.05278	55.2421	53.1148	51
1	11800937	11801112	3wt_3mu_merged_p20_peak_1034b	522	.	8.74417	52.2437	50.1369	127
1	11807010	11807138	3wt_3mu_merged_p20_peak_1035	234	.	5.45224	23.4927	21.6677	103
1	11814377	11814533	3wt_3mu_merged_p20_peak_1036	1180	.	14.8136	118.065	115.649	94
1	11822722	11822851	3wt_3mu_merged_p20_peak_1037	599	.	6.3825	59.9516	57.7952	42
1	11825583	11825861	3wt_3mu_merged_p20_peak_1038a	11292	.	39.5349	1129.27	1125.77	110
1	11825583	11825861	3wt_3mu_merged_p20_peak_1038b	390	.	4.63583	39.0772	37.0763	261
1	11827968	11828056	3wt_3mu_merged_p20_peak_1039	510	.	5.11591	51.0192	48.923	41
1	11832064	11832180	3wt_3mu_merged_p20_peak_1040	296	.	5.54254	29.6837	27.781	25
1	11832538	11832633	3wt_3mu_merged_p20_peak_1041	1226	.	13.0343	122.626	120.196	53
1	11832831	11832897	3wt_3mu_merged_p20_peak_1042	358	.	6.14209	35.8974	33.9283	39
1	1184058	1184164	3wt_3mu_merged_p20_peak_169	631	.	9.27489	63.1321	60.9564	35
1	11844081	11844219	3wt_3mu_merged_p20_peak_1043	1094	.	7.86402	109.411	107.025	74
1	11844274	11844443	3wt_3mu_merged_p20_peak_1044	1927	.	10.9236	192.702	190.094	56
1	11848778	11849027	3wt_3mu_merged_p20_peak_1045	9724	.	23.6435	972.497	969.101	155
1	11849323	11849539	3wt_3mu_merged_p20_peak_1046	2942	.	11.5235	294.252	291.47	58
1	11850051	11850211	3wt_3mu_merged_p20_peak_1047	3737	.	14.0027	373.715	370.83	59
1	11850286	11850462	3wt_3mu_merged_p20_peak_1048	1745	.	8.67519	174.517	171.948	57
1	11861691	11861767	3wt_3mu_merged_p20_peak_1049	954	.	12.8591	95.4617	93.1285	44
1	11869046	11869106	3wt_3mu_merged_p20_peak_1050	454	.	8.02406	45.4274	43.3718	27
1	11878667	11878917	3wt_3mu_merged_p20_peak_1051	4139	.	34.4253	413.964	411.032	202
1	1187939	1188019	3wt_3mu_merged_p20_peak_170	697	.	10.493	69.7953	67.5807	38
1	11881537	11881596	3wt_3mu_merged_p20_peak_1052	282	.	5.92984	28.2152	26.3313	17
1	1188661	1188775	3wt_3mu_merged_p20_peak_171	532	.	8.84704	53.2382	51.1244	60
1	11891530	11891616	3wt_3mu_merged_p20_peak_1053	762	.	11.1102	76.2934	74.0452	49
1	11898953	11899122	3wt_3mu_merged_p20_peak_1054	708	.	10.5959	70.868	68.6476	78
1	11912837	11912911	3wt_3mu_merged_p20_peak_1055	335	.	6.68672	33.5063	31.559	28
1	11931369	11931586	3wt_3mu_merged_p20_peak_1056	3551	.	27.4165	355.187	352.324	117
1	11931689	11931849	3wt_3mu_merged_p20_peak_1057	1622	.	15.8736	162.261	159.722	83
1	11934	12041	3wt_3mu_merged_p20_peak_5	3638	.	13.781	363.813	360.939	47
1	11961635	11961721	3wt_3mu_merged_p20_peak_1058	425	.	7.71544	42.5876	40.5553	30
1	11972470	11972590	3wt_3mu_merged_p20_peak_1059	793	.	5.9971	79.3913	77.1292	56
1	11972671	11972943	3wt_3mu_merged_p20_peak_1060a	2057	.	10.3624	205.758	203.123	53
1	11972671	11972943	3wt_3mu_merged_p20_peak_1060b	556	.	4.85384	55.6599	53.5306	228
1	11973128	11973468	3wt_3mu_merged_p20_peak_1061a	609	.	5.06621	60.904	58.7415	27
1	11973128	11973468	3wt_3mu_merged_p20_peak_1061b	7881	.	24.7697	788.191	784.927	226
1	11977344	11977452	3wt_3mu_merged_p20_peak_1062	822	.	5.95553	82.2299	79.954	41
1	11993693	11993884	3wt_3mu_merged_p20_peak_1063	4231	.	32.1387	423.174	420.232	95
1	11994158	11994230	3wt_3mu_merged_p20_peak_1064	558	.	8.21273	55.8094	53.6795	35
1	12002647	12002721	3wt_3mu_merged_p20_peak_1065	708	.	10.5959	70.868	68.6476	37
1	1200932	1201171	3wt_3mu_merged_p20_peak_172	1132	.	14.4022	113.211	110.812	106
1	120219	120305	3wt_3mu_merged_p20_peak_35	535	.	8.53706	53.5514	51.4362	43
1	12025787	12025968	3wt_3mu_merged_p20_peak_1066	352	.	6.89246	35.2727	33.3073	51
1	12046431	12046503	3wt_3mu_merged_p20_peak_1067	444	.	7.92119	44.4752	42.4273	33
1	12048957	12049013	3wt_3mu_merged_p20_peak_1068	552	.	9.05278	55.2421	53.1148	29
1	12049185	12049305	3wt_3mu_merged_p20_peak_1069	2394	.	24.175	239.467	236.771	58
1	12054894	12055025	3wt_3mu_merged_p20_peak_1070	920	.	12.5505	92.0023	89.6832	75
1	12064753	12064939	3wt_3mu_merged_p20_peak_1071	4359	.	25.6161	435.967	433.011	60
1	12068647	12068759	3wt_3mu_merged_p20_peak_1072	4106	.	25.1182	410.622	407.694	50
1	12087133	12087260	3wt_3mu_merged_p20_peak_1073	552	.	8.10724	55.2856	53.158	68
1	12103460	12103631	3wt_3mu_merged_p20_peak_1074	3546	.	32.0962	354.645	351.782	79
1	12170807	12170884	3wt_3mu_merged_p20_peak_1075	762	.	11.1102	76.2934	74.0452	44
1	12190265	12190488	3wt_3mu_merged_p20_peak_1076a	2758	.	24.1179	275.865	273.109	57
1	12190265	12190488	3wt_3mu_merged_p20_peak_1076b	1091	.	12.7744	109.197	106.813	140
1	12199570	12199635	3wt_3mu_merged_p20_peak_1077	275	.	5.96661	27.5371	25.658	25
1	1222643	1222701	3wt_3mu_merged_p20_peak_173	219	.	5.2465	21.9303	20.1286	5
1	12228143	12228304	3wt_3mu_merged_p20_peak_1078	6100	.	48.0415	610.029	606.907	68
1	12259753	12259914	3wt_3mu_merged_p20_peak_1079a	687	.	10.3901	68.7269	66.518	40
1	12259753	12259914	3wt_3mu_merged_p20_peak_1079b	562	.	9.15566	56.2515	54.1174	124
1	1226612	1226812	3wt_3mu_merged_p20_peak_174	545	.	8.8836	54.5187	52.3969	149
1	12270133	12270204	3wt_3mu_merged_p20_peak_1080	343	.	6.78959	34.3862	32.4298	32
1	12277336	12277467	3wt_3mu_merged_p20_peak_1081	2524	.	9.78947	252.47	249.751	67
1	12277958	12278060	3wt_3mu_merged_p20_peak_1082	668	.	4.63315	66.8078	64.6098	44
1	12278200	12278878	3wt_3mu_merged_p20_peak_1083a	905	.	5.42567	90.5104	88.1983	101
1	12278200	12278878	3wt_3mu_merged_p20_peak_1083b	10482	.	24.9933	1048.28	1044.83	328
1	12291627	12292086	3wt_3mu_merged_p20_peak_1084a	2291	.	12.3649	229.118	226.44	89
1	12291627	12292086	3wt_3mu_merged_p20_peak_1084b	7224	.	26.9884	722.407	719.193	243
1	12295109	12295222	3wt_3mu_merged_p20_peak_1085	1571	.	9.5889	157.116	154.589	47
1	12301791	12302250	3wt_3mu_merged_p20_peak_1086a	19316	.	44.9912	1931.67	1927.66	93
1	12301791	12302250	3wt_3mu_merged_p20_peak_1086b	5096	.	17.4205	509.688	506.657	345
1	1231458	1231613	3wt_3mu_merged_p20_peak_175	407	.	7.17456	40.7555	38.739	32
1	12335777	12335864	3wt_3mu_merged_p20_peak_1087	1948	.	19.6012	194.873	192.26	44
1	12338279	12338332	3wt_3mu_merged_p20_peak_1088	822	.	11.5634	82.2178	79.9419	24
1	12338669	12338825	3wt_3mu_merged_p20_peak_1089	3126	.	28.5224	312.627	309.819	68
1	1234670	1234792	3wt_3mu_merged_p20_peak_176	542	.	8.94991	54.2377	52.1171	76
1	12347968	12348500	3wt_3mu_merged_p20_peak_1090a	21812	.	40.9927	2181.2	2177.03	143
1	12347968	12348500	3wt_3mu_merged_p20_peak_1090b	21869	.	41.0465	2187	2182.82	221
1	12347968	12348500	3wt_3mu_merged_p20_peak_1090c	1175	.	6.08515	117.541	115.128	480
1	12381601	12381713	3wt_3mu_merged_p20_peak_1091	1192	.	14.9165	119.286	116.866	71
1	12394063	12394226	3wt_3mu_merged_p20_peak_1092	14426	.	67.6401	1442.61	1438.91	77
1	12399872	12399980	3wt_3mu_merged_p20_peak_1093	1144	.	14.505	114.42	112.017	53
1	12403482	12403616	3wt_3mu_merged_p20_peak_1094	634	.	9.87576	63.4496	61.2707	60
1	1240808	1241060	3wt_3mu_merged_p20_peak_177a	326	.	6.58384	32.6329	30.6949	37
1	1240808	1241060	3wt_3mu_merged_p20_peak_177b	1430	.	16.8711	143.03	140.539	181
1	12420155	12420261	3wt_3mu_merged_p20_peak_1095	326	.	6.58384	32.6329	30.6949	52
1	12426079	12426287	3wt_3mu_merged_p20_peak_1096	2763	.	24.789	276.378	273.622	148
1	12430524	12430624	3wt_3mu_merged_p20_peak_1097	555	.	7.84623	55.5156	53.3871	66
1	12435075	12435212	3wt_3mu_merged_p20_peak_1098	397	.	7.40682	39.7993	37.7912	89
1	12444701	12444860	3wt_3mu_merged_p20_peak_1099	1168	.	14.7108	116.847	114.436	99
1	12444919	12445169	3wt_3mu_merged_p20_peak_1100	2084	.	21.9119	208.435	205.794	56
1	12450003	12450062	3wt_3mu_merged_p20_peak_1101	361	.	6.99533	36.1656	34.1914	30
1	12450136	12450202	3wt_3mu_merged_p20_peak_1102	352	.	6.89246	35.2727	33.3073	31
1	1245144	1245405	3wt_3mu_merged_p20_peak_178a	687	.	10.3901	68.7269	66.518	91
1	1245144	1245405	3wt_3mu_merged_p20_peak_178b	300	.	6.27523	30.0534	28.1441	237
1	12463287	12463601	3wt_3mu_merged_p20_peak_1103	897	.	12.3447	89.7138	87.4042	128
1	12472304	12472481	3wt_3mu_merged_p20_peak_1104	954	.	12.8591	95.4617	93.1285	98
1	12478564	12478670	3wt_3mu_merged_p20_peak_1105	730	.	10.8016	73.0259	70.7942	64
1	12485647	12485781	3wt_3mu_merged_p20_peak_1106	697	.	10.493	69.7953	67.5807	65
1	12491611	12491684	3wt_3mu_merged_p20_peak_1107	275	.	5.96661	27.5371	25.658	34
1	12496460	12496646	3wt_3mu_merged_p20_peak_1108	574	.	9.04554	57.4912	55.3496	60
1	12496758	12496822	3wt_3mu_merged_p20_peak_1109	258	.	5.76086	25.8963	24.0382	42
1	12499065	12499143	3wt_3mu_merged_p20_peak_1110	370	.	7.09821	37.0648	35.0819	50
1	12505858	12505913	3wt_3mu_merged_p20_peak_1111	341	.	4.91581	34.1546	32.2033	25
1	12508892	12509163	3wt_3mu_merged_p20_peak_1112	1565	.	11.9461	156.558	154.032	85
1	12509310	12509670	3wt_3mu_merged_p20_peak_1113	2595	.	16.6111	259.585	256.855	167
1	12514635	12514867	3wt_3mu_merged_p20_peak_1114a	473	.	8.2298	47.3483	45.2776	49
1	12514635	12514867	3wt_3mu_merged_p20_peak_1114b	562	.	9.15566	56.2515	54.1174	117
1	1252016	1252124	3wt_3mu_merged_p20_peak_179a	645	.	9.72376	64.5883	62.4029	22
1	1252016	1252124	3wt_3mu_merged_p20_peak_179b	322	.	6.37771	32.2224	30.291	88
1	1252806	1252886	3wt_3mu_merged_p20_peak_180	370	.	6.86747	37.0352	35.0558	30
1	1252943	1253150	3wt_3mu_merged_p20_peak_181	701	.	10.1484	70.1351	67.9191	78
1	12562149	12562219	3wt_3mu_merged_p20_peak_1115	267	.	5.86373	26.713	24.8442	39
1	12564505	12564660	3wt_3mu_merged_p20_peak_1116	749	.	10.6702	74.992	72.7515	91
1	12572518	12572677	3wt_3mu_merged_p20_peak_1117	1229	.	15.2251	122.967	120.535	80
1	12578972	12579121	3wt_3mu_merged_p20_peak_1118	644	.	9.97864	64.4963	62.3112	68
1	12595892	12596039	3wt_3mu_merged_p20_peak_1119	425	.	7.71544	42.5876	40.5553	86
1	12653987	12654172	3wt_3mu_merged_p20_peak_1120	851	.	11.9332	85.18	82.8902	110
1	12689758	12689869	3wt_3mu_merged_p20_peak_1121	624	.	9.77289	62.4075	60.2348	50
1	12706376	12706540	3wt_3mu_merged_p20_peak_1122	1304	.	15.8424	130.407	127.953	60
1	12713533	12713642	3wt_3mu_merged_p20_peak_1123	572	.	9.25853	57.2657	55.1251	39
1	1272961	1273183	3wt_3mu_merged_p20_peak_182	851	.	11.9332	85.18	82.8902	147
1	12742386	12742457	3wt_3mu_merged_p20_peak_1124	989	.	13.1677	98.9522	96.6051	38
1	1275627	1275768	3wt_3mu_merged_p20_peak_183	697	.	10.493	69.7953	67.5807	77
1	12757238	12757305	3wt_3mu_merged_p20_peak_1125	258	.	5.76086	25.8963	24.0382	39
1	12757611	12757823	3wt_3mu_merged_p20_peak_1126	2553	.	25.3066	255.324	252.601	123
1	12763266	12763488	3wt_3mu_merged_p20_peak_1127	23603	.	46.4967	2360.36	2356.08	84
1	12764089	12764163	3wt_3mu_merged_p20_peak_1128	550	.	4.29634	55.0444	52.9201	35
1	12767088	12767189	3wt_3mu_merged_p20_peak_1129	312	.	3.22008	31.27	29.3486	49
1	12790498	12790630	3wt_3mu_merged_p20_peak_1130	370	.	7.09821	37.0648	35.0819	69
1	12819423	12819656	3wt_3mu_merged_p20_peak_1131	818	.	11.6246	81.8187	79.5442	57
1	12824318	12824461	3wt_3mu_merged_p20_peak_1132	710	.	10.4932	71.0513	68.8303	99
1	1282689	1282752	3wt_3mu_merged_p20_peak_184	227	.	5.34937	22.7074	20.8939	49
1	12833688	12833886	3wt_3mu_merged_p20_peak_1133	644	.	9.97864	64.4963	62.3112	104
1	12856332	12856406	3wt_3mu_merged_p20_peak_1134	416	.	7.61257	41.6523	39.628	31
1	12860671	12860924	3wt_3mu_merged_p20_peak_1135a	874	.	12.139	87.4396	85.1399	75
1	12860671	12860924	3wt_3mu_merged_p20_peak_1135b	370	.	7.09821	37.0648	35.0819	220
1	12897571	12897752	3wt_3mu_merged_p20_peak_1136	920	.	12.5505	92.0023	89.6832	77
1	12905534	12905605	3wt_3mu_merged_p20_peak_1137	397	.	7.40682	39.7993	37.7912	28
1	12905724	12905867	3wt_3mu_merged_p20_peak_1138	370	.	7.09821	37.0648	35.0819	39
1	129090	129149	3wt_3mu_merged_p20_peak_36	422	.	7.29117	42.2482	40.2206	28
1	12909699	12910216	3wt_3mu_merged_p20_peak_1139a	625	.	9.52241	62.5046	60.3315	117
1	12909699	12910216	3wt_3mu_merged_p20_peak_1139b	575	.	9.06189	57.5634	55.4215	259
1	12909699	12910216	3wt_3mu_merged_p20_peak_1139c	305	.	6.18625	30.548	28.6354	497
1	12924415	12924761	3wt_3mu_merged_p20_peak_1140a	773	.	11.2131	77.3906	75.1371	51
1	12924415	12924761	3wt_3mu_merged_p20_peak_1140b	989	.	13.1677	98.9522	96.6051	206
1	12931245	12931578	3wt_3mu_merged_p20_peak_1141	613	.	9.67002	61.3699	59.2034	179
1	12962830	12963074	3wt_3mu_merged_p20_peak_1142	999	.	11.1576	99.9676	97.6175	153
1	12968210	12968264	3wt_3mu_merged_p20_peak_1143	282	.	5.57013	28.2537	26.3695	25
1	12971351	12971580	3wt_3mu_merged_p20_peak_1144a	377	.	6.70682	37.7072	35.7206	44
1	12971351	12971580	3wt_3mu_merged_p20_peak_1144b	363	.	6.51705	36.3843	34.4089	194
1	12971734	12971823	3wt_3mu_merged_p20_peak_1145	1026	.	12.0301	102.639	100.278	48
1	12976791	12977181	3wt_3mu_merged_p20_peak_1146a	417	.	7.29425	41.7733	39.7483	56
1	12976791	12977181	3wt_3mu_merged_p20_peak_1146b	789	.	10.8478	78.99	76.7295	119
1	12976791	12977181	3wt_3mu_merged_p20_peak_1146c	879	.	11.6556	87.9728	85.6714	276
1	1298964	1299092	3wt_3mu_merged_p20_peak_185	773	.	11.2131	77.3906	75.1371	72
1	12998440	12998548	3wt_3mu_merged_p20_peak_1147a	234	.	5.45224	23.4927	21.6677	19
1	12998440	12998548	3wt_3mu_merged_p20_peak_1147b	250	.	5.65799	25.0873	23.24	80
1	12998750	12998826	3wt_3mu_merged_p20_peak_1148	292	.	6.17235	29.2075	27.308	56
1	13012958	13013012	3wt_3mu_merged_p20_peak_1149	234	.	5.45224	23.4927	21.6677	36
1	13019533	13019600	3wt_3mu_merged_p20_peak_1150	211	.	5.14363	21.1616	19.3718	12
1	13042127	13042186	3wt_3mu_merged_p20_peak_1151	483	.	8.33268	48.3169	46.2388	30
1	13042501	13042726	3wt_3mu_merged_p20_peak_1152a	897	.	12.3447	89.7138	87.4042	104
1	13042501	13042726	3wt_3mu_merged_p20_peak_1152b	204	.	5.04075	20.4014	18.6238	199
1	13049913	13050225	3wt_3mu_merged_p20_peak_1153a	390	.	7.12417	39.0909	37.0899	39
1	13049913	13050225	3wt_3mu_merged_p20_peak_1153b	410	.	7.36079	41.084	39.0658	161
1	13049913	13050225	3wt_3mu_merged_p20_peak_1153c	303	.	6.14825	30.388	28.4765	280
1	1305256	1305332	3wt_3mu_merged_p20_peak_186	624	.	9.77289	62.4075	60.2348	40
1	13053343	13053400	3wt_3mu_merged_p20_peak_1154	258	.	5.76086	25.8963	24.0382	29
1	13059252	13059380	3wt_3mu_merged_p20_peak_1155	752	.	11.0074	75.2002	72.9574	60
1	13062077	13062236	3wt_3mu_merged_p20_peak_1156	289	.	6.00998	28.964	27.0705	73
1	13066868	13066975	3wt_3mu_merged_p20_peak_1157	447	.	7.86577	44.7597	42.7103	52
1	13067298	13067440	3wt_3mu_merged_p20_peak_1158	624	.	9.77289	62.4075	60.2348	70
1	13077337	13077625	3wt_3mu_merged_p20_peak_1159a	585	.	8.78214	58.5501	56.4018	91
1	13077337	13077625	3wt_3mu_merged_p20_peak_1159b	384	.	6.86342	38.4162	36.4223	255
1	13106799	13106957	3wt_3mu_merged_p20_peak_1160	542	.	8.94991	54.2377	52.1171	106
1	13107045	13107112	3wt_3mu_merged_p20_peak_1161	343	.	6.78959	34.3862	32.4298	25
1	13109011	13109094	3wt_3mu_merged_p20_peak_1162	382	.	7.15041	38.2416	36.2487	30
1	131193	131294	3wt_3mu_merged_p20_peak_37	246	.	5.46092	24.6782	22.8391	51
1	13141385	13141671	3wt_3mu_merged_p20_peak_1163a	444	.	7.92119	44.4752	42.4273	72
1	13141385	13141671	3wt_3mu_merged_p20_peak_1163b	730	.	10.8016	73.0259	70.7942	198
1	13155849	13155908	3wt_3mu_merged_p20_peak_1164	317	.	6.48097	31.7662	29.8377	24
1	13156264	13156368	3wt_3mu_merged_p20_peak_1165	634	.	9.87576	63.4496	61.2707	49
1	13169608	13169767	3wt_3mu_merged_p20_peak_1166	494	.	7.56035	49.4688	47.3825	113
1	13170122	13170403	3wt_3mu_merged_p20_peak_1167a	394	.	6.59562	39.455	37.452	103
1	13170122	13170403	3wt_3mu_merged_p20_peak_1167b	1104	.	12.4644	110.409	108.02	193
1	13171005	13171094	3wt_3mu_merged_p20_peak_1168	333	.	5.9616	33.3273	31.3849	28
1	13176250	13176782	3wt_3mu_merged_p20_peak_1169a	365	.	5.52329	36.5742	34.5976	27
1	13176250	13176782	3wt_3mu_merged_p20_peak_1169b	1872	.	14.8559	187.227	184.63	245
1	13176250	13176782	3wt_3mu_merged_p20_peak_1169c	1183	.	10.9827	118.37	115.954	363
1	13176250	13176782	3wt_3mu_merged_p20_peak_1169d	251	.	4.48663	25.1281	23.2805	519
1	13180752	13180918	3wt_3mu_merged_p20_peak_1170a	222	.	4.1552	22.2742	20.4697	57
1	13180752	13180918	3wt_3mu_merged_p20_peak_1170b	495	.	6.40635	49.5485	47.4618	137
1	13188016	13188104	3wt_3mu_merged_p20_peak_1171	603	.	9.56715	60.3368	58.1767	35
1	13210003	13210194	3wt_3mu_merged_p20_peak_1172a	3993	.	27.9762	399.371	396.455	66
1	13210003	13210194	3wt_3mu_merged_p20_peak_1172b	3609	.	25.9907	360.985	358.115	126
1	13248495	13248676	3wt_3mu_merged_p20_peak_1173	2865	.	24.4931	286.541	283.77	94
1	13250832	13251076	3wt_3mu_merged_p20_peak_1174a	618	.	9.37043	61.8246	59.6563	53
1	13250832	13251076	3wt_3mu_merged_p20_peak_1174b	557	.	8.77304	55.7152	53.5858	155
1	13260830	13260889	3wt_3mu_merged_p20_peak_1175	350	.	5.59615	35.0474	33.087	36
1	13264781	13264839	3wt_3mu_merged_p20_peak_1176	424	.	5.00074	42.4981	40.4693	25
1	13265291	13265420	3wt_3mu_merged_p20_peak_1177	1050	.	8.22366	105.014	102.644	60
1	13267535	13267708	3wt_3mu_merged_p20_peak_1178	3526	.	16.2809	352.6	349.74	67
1	13270914	13271206	3wt_3mu_merged_p20_peak_1179a	641	.	5.55979	64.1031	61.9215	36
1	13270914	13271206	3wt_3mu_merged_p20_peak_1179b	1154	.	7.66258	115.444	113.038	240
1	13274266	13274385	3wt_3mu_merged_p20_peak_1180	398	.	4.76904	39.8794	37.8709	57
1	13274440	13274520	3wt_3mu_merged_p20_peak_1181	236	.	3.67931	23.6433	21.8172	47
1	13291258	13291387	3wt_3mu_merged_p20_peak_1182	672	.	10.0575	67.2771	65.0773	56
1	13296247	13296580	3wt_3mu_merged_p20_peak_1183a	1303	.	13.1297	130.313	127.86	113
1	13296247	13296580	3wt_3mu_merged_p20_peak_1183b	1449	.	14.4154	144.937	142.442	266
1	13300232	13300399	3wt_3mu_merged_p20_peak_1184	466	.	6.50519	46.6052	44.5409	72
1	13302932	13303239	3wt_3mu_merged_p20_peak_1185	1232	.	14.1523	123.296	120.864	91
1	13315193	13315337	3wt_3mu_merged_p20_peak_1186	795	.	11.4189	79.5969	77.3328	100
1	13347461	13347568	3wt_3mu_merged_p20_peak_1187	613	.	9.67002	61.3699	59.2034	35
1	13353233	13353376	3wt_3mu_merged_p20_peak_1188	297	.	5.7129	29.7024	27.7996	54
1	13357308	13357539	3wt_3mu_merged_p20_peak_1189	1160	.	10.918	116.003	113.594	93
1	13360689	13360919	3wt_3mu_merged_p20_peak_1190	1046	.	9.01733	104.625	102.257	99
1	13363314	13363369	3wt_3mu_merged_p20_peak_1191	258	.	4.40574	25.8947	24.0382	25
1	13365263	13365487	3wt_3mu_merged_p20_peak_1192a	885	.	6.79648	88.564	86.2606	82
1	13365263	13365487	3wt_3mu_merged_p20_peak_1192b	566	.	5.27611	56.6198	54.4841	181
1	13367674	13367764	3wt_3mu_merged_p20_peak_1193	401	.	4.61243	40.176	38.1658	32
1	13369863	13370283	3wt_3mu_merged_p20_peak_1194a	2867	.	14.8429	286.798	284.026	178
1	13369863	13370283	3wt_3mu_merged_p20_peak_1194b	1705	.	10.7067	170.584	168.024	333
1	13370427	13370483	3wt_3mu_merged_p20_peak_1195	293	.	4.19981	29.3052	27.4051	35
1	13377467	13377578	3wt_3mu_merged_p20_peak_1196	1953	.	17.1523	195.393	192.779	65
1	13380785	13380971	3wt_3mu_merged_p20_peak_1197	1137	.	11.8318	113.769	111.368	51
1	13383341	13383458	3wt_3mu_merged_p20_peak_1198	564	.	9.07109	56.4618	54.3268	73
1	13394733	13394828	3wt_3mu_merged_p20_peak_1199	483	.	8.33268	48.3169	46.2388	67
1	13402325	13402395	3wt_3mu_merged_p20_peak_1200	352	.	6.89246	35.2727	33.3073	39
1	13406194	13406308	3wt_3mu_merged_p20_peak_1201	353	.	5.96017	35.3957	33.4296	27
1	13408078	13408179	3wt_3mu_merged_p20_peak_1202	471	.	7.39468	47.1565	45.0894	66
1	13408324	13408556	3wt_3mu_merged_p20_peak_1203	1292	.	13.9955	129.204	126.753	113
1	13416680	13416885	3wt_3mu_merged_p20_peak_1204	890	.	10.818	89.0891	86.7828	128
1	13417270	13417578	3wt_3mu_merged_p20_peak_1205a	826	.	10.0783	82.6712	80.3937	90
1	13417270	13417578	3wt_3mu_merged_p20_peak_1205b	439	.	6.8458	43.9217	41.8795	255
1	13426228	13426331	3wt_3mu_merged_p20_peak_1206	522	.	8.74417	52.2437	50.1369	50
1	13432363	13432418	3wt_3mu_merged_p20_peak_1207	234	.	5.45224	23.4927	21.6677	43
1	13443113	13443342	3wt_3mu_merged_p20_peak_1208	1004	.	11.8674	100.445	98.0921	127
1	13446958	13447101	3wt_3mu_merged_p20_peak_1209a	221	.	4.46889	22.1885	20.3846	24
1	13446958	13447101	3wt_3mu_merged_p20_peak_1209b	371	.	5.90712	37.181	35.1975	107
1	13450322	13450534	3wt_3mu_merged_p20_peak_1210	1015	.	13.2666	101.546	99.1888	97
1	13477045	13477175	3wt_3mu_merged_p20_peak_1211	1317	.	14.0596	131.769	129.311	61
1	13477366	13477754	3wt_3mu_merged_p20_peak_1212a	1003	.	11.8488	100.349	97.9969	53
1	13477366	13477754	3wt_3mu_merged_p20_peak_1212b	1071	.	12.3713	107.146	104.77	170
1	13477366	13477754	3wt_3mu_merged_p20_peak_1212c	813	.	10.4145	81.3272	79.0557	293
1	13493511	13493835	3wt_3mu_merged_p20_peak_1213	2173	.	20.3697	217.366	214.709	112
1	13507088	13507149	3wt_3mu_merged_p20_peak_1214	309	.	6.3781	30.9063	28.9874	25
1	13507341	13507536	3wt_3mu_merged_p20_peak_1215	752	.	11.0074	75.2002	72.9574	82
1	13509468	13509602	3wt_3mu_merged_p20_peak_1216	549	.	7.92831	54.9052	52.7816	48
1	13512923	13513010	3wt_3mu_merged_p20_peak_1217	398	.	6.97932	39.8781	37.8696	39
1	13513152	13513277	3wt_3mu_merged_p20_peak_1218	338	.	6.34565	33.8367	31.8874	49
1	13520132	13520301	3wt_3mu_merged_p20_peak_1219	502	.	8.53842	50.2699	48.1773	63
1	13520474	13520560	3wt_3mu_merged_p20_peak_1220	655	.	10.0815	65.5474	63.3563	44
1	13526615	13526771	3wt_3mu_merged_p20_peak_1221	1184	.	14.2394	118.479	116.063	54
1	1352667	1353020	3wt_3mu_merged_p20_peak_187	7373	.	42.5492	737.373	734.147	288
1	13528859	13528934	3wt_3mu_merged_p20_peak_1222	370	.	7.0856	37.0128	35.0336	38
1	13548996	13549264	3wt_3mu_merged_p20_peak_1223a	1425	.	16.2396	142.576	140.087	68
1	13548996	13549264	3wt_3mu_merged_p20_peak_1223b	1547	.	17.2733	154.728	152.207	205
1	13560839	13561026	3wt_3mu_merged_p20_peak_1224	1543	.	16.6669	154.303	151.783	86
1	13562243	13562447	3wt_3mu_merged_p20_peak_1225	1662	.	17.2653	166.269	163.719	68
1	13569207	13569299	3wt_3mu_merged_p20_peak_1226	267	.	5.86373	26.713	24.8442	48
1	13626677	13626798	3wt_3mu_merged_p20_peak_1227	300	.	6.27523	30.0534	28.1441	35
1	13637176	13637429	3wt_3mu_merged_p20_peak_1228	5906	.	33.2451	590.689	587.584	135
1	13645021	13645272	3wt_3mu_merged_p20_peak_1229	1955	.	19.029	195.504	192.89	119
1	13653510	13653566	3wt_3mu_merged_p20_peak_1230	258	.	5.76086	25.8963	24.0382	25
1	13654209	13654487	3wt_3mu_merged_p20_peak_1231a	463	.	8.12693	46.3852	44.322	62
1	13654209	13654487	3wt_3mu_merged_p20_peak_1231b	335	.	6.68672	33.5063	31.559	195
1	13654846	13654998	3wt_3mu_merged_p20_peak_1232	582	.	9.3614	58.2847	56.1375	102
1	13660816	13660965	3wt_3mu_merged_p20_peak_1233	379	.	7.20108	37.9702	35.9788	72
1	13672742	13672857	3wt_3mu_merged_p20_peak_1234	593	.	9.46427	59.3084	57.1547	50
1	1367811	1367932	3wt_3mu_merged_p20_peak_188	1634	.	18.2478	163.405	160.863	64
1	13685046	13685168	3wt_3mu_merged_p20_peak_1235	532	.	8.84704	53.2382	51.1244	48
1	13691832	13692107	3wt_3mu_merged_p20_peak_1236a	708	.	10.5959	70.868	68.6476	74
1	13691832	13692107	3wt_3mu_merged_p20_peak_1236b	416	.	7.61257	41.6523	39.628	245
1	13696437	13696687	3wt_3mu_merged_p20_peak_1237a	299	.	6.14183	29.9352	28.0309	28
1	13696437	13696687	3wt_3mu_merged_p20_peak_1237b	243	.	5.47114	24.336	22.4994	117
1	13696437	13696687	3wt_3mu_merged_p20_peak_1237c	397	.	7.27878	39.753	37.7483	199
1	13706294	13706353	3wt_3mu_merged_p20_peak_1238	300	.	6.27523	30.0534	28.1441	36
1	1371778	1371863	3wt_3mu_merged_p20_peak_189	233	.	5.15383	23.3831	21.5643	54
1	1372288	1372533	3wt_3mu_merged_p20_peak_190	913	.	11.807	91.368	89.0521	74
1	13724233	13724490	3wt_3mu_merged_p20_peak_1239	2582	.	22.4041	258.276	255.548	95
1	1375015	1375262	3wt_3mu_merged_p20_peak_191a	387	.	5.49581	38.7257	36.73	25
1	1375015	1375262	3wt_3mu_merged_p20_peak_191b	371	.	5.37128	37.1627	35.1793	228
1	13765305	13765511	3wt_3mu_merged_p20_peak_1240	851	.	11.9332	85.18	82.8902	90
1	1377476	1377627	3wt_3mu_merged_p20_peak_192	417	.	6.35495	41.7661	39.7411	54
1	1377867	1377929	3wt_3mu_merged_p20_peak_193	303	.	5.37143	30.3563	28.445	28
1	13781842	13781903	3wt_3mu_merged_p20_peak_1241	416	.	7.61257	41.6523	39.628	31
1	1378201	1378498	3wt_3mu_merged_p20_peak_194	1617	.	14.6961	161.733	159.194	103
1	13791363	13791455	3wt_3mu_merged_p20_peak_1242	435	.	7.81831	43.5285	41.4884	56
1	13791559	13791670	3wt_3mu_merged_p20_peak_1243a	242	.	5.55512	24.286	22.4498	22
1	13791559	13791670	3wt_3mu_merged_p20_peak_1243b	283	.	6.06948	28.3687	26.4793	90
1	13803996	13804129	3wt_3mu_merged_p20_peak_1244	454	.	7.55214	45.4133	43.3605	72
1	13807896	13808018	3wt_3mu_merged_p20_peak_1245	266	.	5.39606	26.687	24.8231	50
1	13808127	13808302	3wt_3mu_merged_p20_peak_1246a	223	.	4.91198	22.3262	20.5213	25
1	13808127	13808302	3wt_3mu_merged_p20_peak_1246b	391	.	6.8216	39.1561	37.1548	146
1	13816410	13816481	3wt_3mu_merged_p20_peak_1247	234	.	5.25456	23.4431	21.6238	41
1	13818342	13818488	3wt_3mu_merged_p20_peak_1248	331	.	6.39941	33.195	31.2535	81
1	13843074	13843221	3wt_3mu_merged_p20_peak_1249	435	.	7.81831	43.5285	41.4884	69
1	13857273	13857627	3wt_3mu_merged_p20_peak_1250a	539	.	8.15364	53.9244	51.8075	48
1	13857273	13857627	3wt_3mu_merged_p20_peak_1250b	527	.	8.02905	52.7943	50.6849	142
1	13857273	13857627	3wt_3mu_merged_p20_peak_1250c	471	.	7.49341	47.1392	45.0721	271
1	1385943	1385999	3wt_3mu_merged_p20_peak_195	283	.	6.06948	28.3687	26.4793	40
1	13866046	13866268	3wt_3mu_merged_p20_peak_1251	840	.	11.8303	84.0558	81.771	147
1	13881693	13881801	3wt_3mu_merged_p20_peak_1252	407	.	7.5097	40.7229	38.7066	55
1	13887184	13887475	3wt_3mu_merged_p20_peak_1253	2419	.	18.1729	241.961	239.26	112
1	13895163	13895336	3wt_3mu_merged_p20_peak_1254	687	.	10.3901	68.7269	66.518	81
1	13911219	13911374	3wt_3mu_merged_p20_peak_1255	1217	.	15.1223	121.737	119.309	89
1	13930608	13930950	3wt_3mu_merged_p20_peak_1256	6899	.	38.5779	689.9	686.711	67
1	13953511	13953610	3wt_3mu_merged_p20_peak_1257	542	.	8.94991	54.2377	52.1171	66
1	13966829	13967125	3wt_3mu_merged_p20_peak_1258	24326	.	37.3699	2432.67	2428.34	194
1	13967641	13967697	3wt_3mu_merged_p20_peak_1259	494	.	3.53582	49.4531	47.3669	29
1	13967900	13967959	3wt_3mu_merged_p20_peak_1260	533	.	3.64302	53.3371	51.2229	32
1	13968040	13968247	3wt_3mu_merged_p20_peak_1261	2432	.	8.04896	243.296	240.593	101
1	13976044	13976143	3wt_3mu_merged_p20_peak_1262	1144	.	14.505	114.42	112.017	55
1	13979437	13979544	3wt_3mu_merged_p20_peak_1263	1932	.	20.7803	193.282	190.672	47
1	13989220	13989523	3wt_3mu_merged_p20_peak_1264	5398	.	34.6096	539.87	536.811	118
1	13990166	13990226	3wt_3mu_merged_p20_peak_1265	870	.	10.09	87.0238	84.7267	30
1	13996924	13996993	3wt_3mu_merged_p20_peak_1266	655	.	10.0815	65.5474	63.3563	31
1	13999782	13999877	3wt_3mu_merged_p20_peak_1267	1329	.	16.0481	132.909	130.448	50
1	14012211	14012390	3wt_3mu_merged_p20_peak_1268	2210	.	22.8377	221.016	218.352	111
1	14014752	14014847	3wt_3mu_merged_p20_peak_1269	1217	.	15.1223	121.737	119.309	41
1	14020371	14020511	3wt_3mu_merged_p20_peak_1270	2921	.	27.8785	292.139	289.36	76
1	1402545	1402797	3wt_3mu_merged_p20_peak_196	19367	.	58.8154	1936.77	1932.76	155
1	14029082	14029830	3wt_3mu_merged_p20_peak_1271a	6155	.	24.4443	615.57	612.442	92
1	14029082	14029830	3wt_3mu_merged_p20_peak_1271b	1263	.	8.6322	126.38	123.939	265
1	14029082	14029830	3wt_3mu_merged_p20_peak_1271c	1009	.	7.53095	100.928	98.5742	561
1	14029082	14029830	3wt_3mu_merged_p20_peak_1271d	3215	.	15.5548	321.539	318.719	682
1	14035375	14035477	3wt_3mu_merged_p20_peak_1272	576	.	9.08066	57.6461	55.5038	46
1	14035740	14035826	3wt_3mu_merged_p20_peak_1273	534	.	7.84216	53.4298	51.3152	53
1	14040613	14040724	3wt_3mu_merged_p20_peak_1274	1410	.	15.7426	141.013	138.529	65
1	14045368	14045446	3wt_3mu_merged_p20_peak_1275	407	.	7.5097	40.7229	38.7066	42
1	14063908	14064160	3wt_3mu_merged_p20_peak_1276	4603	.	37.7056	460.324	457.343	103
1	14078424	14078516	3wt_3mu_merged_p20_peak_1277	292	.	6.17235	29.2075	27.308	60
1	14082655	14082723	3wt_3mu_merged_p20_peak_1278	352	.	6.89246	35.2727	33.3073	38
1	14096711	14096873	3wt_3mu_merged_p20_peak_1279	532	.	8.84704	53.2382	51.1244	76
1	14108595	14108663	3wt_3mu_merged_p20_peak_1280	502	.	8.53842	50.2699	48.1773	33
1	14127547	14127644	3wt_3mu_merged_p20_peak_1281	522	.	8.74417	52.2437	50.1369	40
1	14180582	14180790	3wt_3mu_merged_p20_peak_1282a	330	.	5.91281	33.0898	31.149	72
1	14180582	14180790	3wt_3mu_merged_p20_peak_1282b	398	.	6.59251	39.8913	37.8827	175
1	14183737	14184018	3wt_3mu_merged_p20_peak_1283	2500	.	22.0753	250.002	247.288	145
1	14196143	14196319	3wt_3mu_merged_p20_peak_1284a	1144	.	14.505	114.42	112.017	35
1	14196143	14196319	3wt_3mu_merged_p20_peak_1284b	644	.	9.97864	64.4963	62.3112	123
1	14196751	14196813	3wt_3mu_merged_p20_peak_1285	267	.	5.86373	26.713	24.8442	28
1	14202066	14202206	3wt_3mu_merged_p20_peak_1286	2753	.	18.6782	275.385	272.631	51
1	14204845	14205021	3wt_3mu_merged_p20_peak_1287	6366	.	31.8168	636.622	633.477	87
1	14211714	14211862	3wt_3mu_merged_p20_peak_1288	761	.	11.0816	76.1691	73.9228	75
1	14217435	14217642	3wt_3mu_merged_p20_peak_1289	3244	.	27.9762	324.402	321.578	81
1	14221769	14221834	3wt_3mu_merged_p20_peak_1290	294	.	6.02599	29.4495	27.5484	37
1	14227122	14227309	3wt_3mu_merged_p20_peak_1291	3056	.	22.6506	305.613	302.815	57
1	14230336	14230409	3wt_3mu_merged_p20_peak_1292	289	.	3.23838	28.9762	27.0826	29
1	1423056	1423202	3wt_3mu_merged_p20_peak_197a	352	.	6.89246	35.2727	33.3073	19
1	1423056	1423202	3wt_3mu_merged_p20_peak_197b	300	.	6.27523	30.0534	28.1441	109
1	14232494	14232582	3wt_3mu_merged_p20_peak_1293	746	.	5.05599	74.6853	72.4459	34
1	14233002	14233055	3wt_3mu_merged_p20_peak_1294	359	.	3.5444	35.9873	34.0177	33
1	14233181	14233556	3wt_3mu_merged_p20_peak_1295a	977	.	5.83001	97.7942	95.4517	42
1	14233181	14233556	3wt_3mu_merged_p20_peak_1295b	2171	.	9.21882	217.193	214.536	263
1	14233812	14233894	3wt_3mu_merged_p20_peak_1296	845	.	5.38117	84.5288	82.2424	45
1	14233995	14234196	3wt_3mu_merged_p20_peak_1297	8808	.	22.9818	880.897	877.565	111
1	14236621	14236792	3wt_3mu_merged_p20_peak_1298	3382	.	12.9783	338.242	335.4	90
1	14261717	14261774	3wt_3mu_merged_p20_peak_1299	492	.	8.43555	49.2908	47.2054	25
1	14283484	14283953	3wt_3mu_merged_p20_peak_1300a	28905	.	35.8668	2890.51	2885.86	179
1	14283484	14283953	3wt_3mu_merged_p20_peak_1300b	11247	.	18.449	1124.77	1121.27	357
1	14284072	14284392	3wt_3mu_merged_p20_peak_1301a	682	.	3.6999	68.2407	66.0354	40
1	14284072	14284392	3wt_3mu_merged_p20_peak_1301b	2026	.	6.40999	202.606	199.977	196
1	14309513	14309812	3wt_3mu_merged_p20_peak_1302	2247	.	18.9959	224.796	222.125	143
1	14339601	14339822	3wt_3mu_merged_p20_peak_1303	14996	.	46.6331	1499.68	1495.94	86
1	14339918	14340024	3wt_3mu_merged_p20_peak_1304	847	.	6.82729	84.705	82.4181	39
1	14343322	14343702	3wt_3mu_merged_p20_peak_1305a	502	.	4.44678	50.2453	48.1552	77
1	14343322	14343702	3wt_3mu_merged_p20_peak_1305b	553	.	4.50454	55.3712	53.2433	313
1	14348219	14348566	3wt_3mu_merged_p20_peak_1306a	6992	.	24.6062	699.201	696.005	112
1	14348219	14348566	3wt_3mu_merged_p20_peak_1306b	606	.	5.56904	60.6847	58.5231	310
1	14349079	14349235	3wt_3mu_merged_p20_peak_1307	4951	.	22.0685	495.189	492.172	66
1	14358043	14358186	3wt_3mu_merged_p20_peak_1308	650	.	7.48491	65.0509	62.8636	80
1	14358281	14358589	3wt_3mu_merged_p20_peak_1309	7636	.	38.798	763.628	760.382	147
1	14363889	14364034	3wt_3mu_merged_p20_peak_1310	4976	.	34.2523	497.618	494.599	79
1	14364187	14364322	3wt_3mu_merged_p20_peak_1311	2054	.	18.3277	205.495	202.861	60
1	14373359	14373417	3wt_3mu_merged_p20_peak_1312	425	.	7.71544	42.5876	40.5553	27
1	14382743	14382881	3wt_3mu_merged_p20_peak_1313	3503	.	26.5669	350.375	347.518	69
1	14382970	14383128	3wt_3mu_merged_p20_peak_1314	4260	.	30.5353	426.046	423.101	76
1	14406008	14406405	3wt_3mu_merged_p20_peak_1315a	5473	.	32.677	547.301	544.234	74
1	14406008	14406405	3wt_3mu_merged_p20_peak_1315b	3005	.	21.5558	300.509	297.718	325
1	144212	144323	3wt_3mu_merged_p20_peak_38	4469	.	27.4293	446.974	444.006	45
1	14426714	14426959	3wt_3mu_merged_p20_peak_1316	2140	.	22.3233	214.007	211.356	135
1	14454364	14454741	3wt_3mu_merged_p20_peak_1317	28627	.	48.9445	2862.7	2858.07	201
1	14465433	14465574	3wt_3mu_merged_p20_peak_1318	600	.	9.1077	60.0559	57.899	36
1	14466222	14466320	3wt_3mu_merged_p20_peak_1319	850	.	11.1818	85.0855	82.7972	36
1	14466881	14466966	3wt_3mu_merged_p20_peak_1320	499	.	7.98371	49.9609	47.8722	35
1	144890	144982	3wt_3mu_merged_p20_peak_39	385	.	5.86508	38.587	36.5921	57
1	14507240	14507666	3wt_3mu_merged_p20_peak_1321a	636	.	6.80052	63.6021	61.4226	30
1	14507240	14507666	3wt_3mu_merged_p20_peak_1321b	8119	.	36.4716	811.923	808.641	311
1	14533442	14533657	3wt_3mu_merged_p20_peak_1322	1748	.	14.4814	174.801	172.231	133
1	14534129	14534218	3wt_3mu_merged_p20_peak_1323	2222	.	14.545	222.239	219.573	53
1	14534643	14534702	3wt_3mu_merged_p20_peak_1324	432	.	5.43315	43.2889	41.253	25
1	14537959	14538019	3wt_3mu_merged_p20_peak_1325	427	.	5.41152	42.7496	40.7164	25
1	14538624	14538768	3wt_3mu_merged_p20_peak_1326	3815	.	24.7393	381.522	378.627	90
1	1455406	1455587	3wt_3mu_merged_p20_peak_198	1940	.	16.2599	194.06	191.448	91
1	1458676	1458869	3wt_3mu_merged_p20_peak_199	739	.	8.73148	73.9055	71.6706	59
1	1459035	1459104	3wt_3mu_merged_p20_peak_200	397	.	6.07477	39.78	37.7751	29
1	14598237	14598304	3wt_3mu_merged_p20_peak_1327	885	.	12.2418	88.5748	86.2702	36
1	14654162	14654263	3wt_3mu_merged_p20_peak_1328	1413	.	14.8722	141.317	138.832	62
1	14655781	14655982	3wt_3mu_merged_p20_peak_1329	7956	.	49.5463	795.639	792.369	54
1	14669648	14669751	3wt_3mu_merged_p20_peak_1330	1919	.	20.6774	191.917	189.31	55
1	14752410	14752524	3wt_3mu_merged_p20_peak_1331	730	.	10.8016	73.0259	70.7942	56
1	14787740	14787954	3wt_3mu_merged_p20_peak_1332a	634	.	9.87576	63.4496	61.2707	25
1	14787740	14787954	3wt_3mu_merged_p20_peak_1332b	666	.	10.1844	66.6029	64.4057	118
1	14789184	14789370	3wt_3mu_merged_p20_peak_1333	1144	.	14.505	114.42	112.017	120
1	14808164	14808237	3wt_3mu_merged_p20_peak_1334	483	.	8.33268	48.3169	46.2388	35
1	14808391	14808564	3wt_3mu_merged_p20_peak_1335	317	.	6.48097	31.7662	29.8377	119
1	14818830	14819296	3wt_3mu_merged_p20_peak_1336a	827	.	9.15931	82.7261	80.4484	48
1	14818830	14819296	3wt_3mu_merged_p20_peak_1336b	2302	.	17.0665	230.28	227.599	387
1	14819414	14819502	3wt_3mu_merged_p20_peak_1337	838	.	8.88516	83.8317	81.549	45
1	14823923	14824026	3wt_3mu_merged_p20_peak_1338	418	.	6.06294	41.8199	39.7946	48
1	14853896	14853950	3wt_3mu_merged_p20_peak_1339	444	.	7.92119	44.4752	42.4273	25
1	14874350	14874500	3wt_3mu_merged_p20_peak_1340a	227	.	5.34937	22.7074	20.8939	23
1	14874350	14874500	3wt_3mu_merged_p20_peak_1340b	258	.	5.76086	25.8963	24.0382	130
1	14892321	14892696	3wt_3mu_merged_p20_peak_1341a	1960	.	20.986	196.018	193.402	172
1	14892321	14892696	3wt_3mu_merged_p20_peak_1341b	624	.	9.77289	62.4075	60.2348	316
1	14913788	14914322	3wt_3mu_merged_p20_peak_1342a	842	.	9.92164	84.2502	81.9647	78
1	14913788	14914322	3wt_3mu_merged_p20_peak_1342b	2098	.	18.0482	209.832	207.189	221
1	14913788	14914322	3wt_3mu_merged_p20_peak_1342c	1630	.	15.179	163.056	160.514	385
1	14928044	14928127	3wt_3mu_merged_p20_peak_1343	483	.	8.33268	48.3169	46.2388	43
1	14938162	14938236	3wt_3mu_merged_p20_peak_1344	435	.	7.81831	43.5285	41.4884	44
1	14941048	14941155	3wt_3mu_merged_p20_peak_1345	309	.	6.3781	30.9063	28.9874	62
1	14964511	14964779	3wt_3mu_merged_p20_peak_1346a	219	.	5.2465	21.9303	20.1286	16
1	14964511	14964779	3wt_3mu_merged_p20_peak_1346b	1028	.	13.2475	102.9	100.538	176
1	14994674	14994860	3wt_3mu_merged_p20_peak_1347a	361	.	6.99533	36.1656	34.1914	34
1	14994674	14994860	3wt_3mu_merged_p20_peak_1347b	397	.	7.40682	39.7993	37.7912	101
1	15021402	15021545	3wt_3mu_merged_p20_peak_1348	309	.	6.3781	30.9063	28.9874	76
1	15024773	15024896	3wt_3mu_merged_p20_peak_1349	420	.	6.9482	42.0907	40.064	70
1	1502605	1502731	3wt_3mu_merged_p20_peak_201	897	.	12.3447	89.7138	87.4042	64
1	15028353	15028506	3wt_3mu_merged_p20_peak_1350	1298	.	13.6909	129.804	127.352	46
1	15030827	15030927	3wt_3mu_merged_p20_peak_1351	417	.	6.98498	41.7948	39.7697	58
1	15038164	15038347	3wt_3mu_merged_p20_peak_1352a	473	.	8.2298	47.3483	45.2776	37
1	15038164	15038347	3wt_3mu_merged_p20_peak_1352b	502	.	8.53842	50.2699	48.1773	130
1	15052016	15052136	3wt_3mu_merged_p20_peak_1353	530	.	8.30699	53.0466	50.936	68
1	15073887	15074127	3wt_3mu_merged_p20_peak_1354	1481	.	17.2826	148.154	145.65	73
1	15079877	15079948	3wt_3mu_merged_p20_peak_1355	300	.	6.27523	30.0534	28.1441	29
1	15093371	15093565	3wt_3mu_merged_p20_peak_1356	737	.	10.3954	73.7405	71.5062	140
1	15098308	15098767	3wt_3mu_merged_p20_peak_1357a	781	.	10.7957	78.1099	75.8538	134
1	15098308	15098767	3wt_3mu_merged_p20_peak_1357b	897	.	12.3447	89.7138	87.4042	259
1	15098308	15098767	3wt_3mu_merged_p20_peak_1357c	1329	.	16.0481	132.909	130.448	381
1	15104996	15105083	3wt_3mu_merged_p20_peak_1358	326	.	6.58384	32.6329	30.6949	28
1	15116356	15116429	3wt_3mu_merged_p20_peak_1359	379	.	7.20108	37.9702	35.9788	33
1	15116894	15117104	3wt_3mu_merged_p20_peak_1360a	435	.	7.81831	43.5285	41.4884	81
1	15116894	15117104	3wt_3mu_merged_p20_peak_1360b	416	.	7.61257	41.6523	39.628	179
1	1512581	1512941	3wt_3mu_merged_p20_peak_202a	425	.	7.71544	42.5876	40.5553	53
1	1512581	1512941	3wt_3mu_merged_p20_peak_202b	1851	.	20.163	185.125	182.532	144
1	1512581	1512941	3wt_3mu_merged_p20_peak_202c	920	.	12.5505	92.0023	89.6832	279
1	15136213	15136483	3wt_3mu_merged_p20_peak_1361	2972	.	10.0887	297.28	294.493	187
1	15136583	15136795	3wt_3mu_merged_p20_peak_1362	5210	.	14.3864	521.035	517.993	95
1	15137861	15138118	3wt_3mu_merged_p20_peak_1363	4851	.	13.2243	485.17	482.163	136
1	15138806	15139007	3wt_3mu_merged_p20_peak_1364	3680	.	11.0537	368.012	365.133	85
1	15153524	15153622	3wt_3mu_merged_p20_peak_1365	352	.	6.89246	35.2727	33.3073	38
1	15159545	15159763	3wt_3mu_merged_p20_peak_1366	2206	.	19.8183	220.674	218.011	71
1	15161241	15161496	3wt_3mu_merged_p20_peak_1367	630	.	8.57933	63.0912	60.9156	109
1	15177670	15178052	3wt_3mu_merged_p20_peak_1368a	1893	.	15.0471	189.301	186.7	106
1	15177670	15178052	3wt_3mu_merged_p20_peak_1368b	1472	.	12.7699	147.288	144.786	257
1	15178159	15178309	3wt_3mu_merged_p20_peak_1369	313	.	5.08915	31.3693	29.4473	40
1	15191297	15191421	3wt_3mu_merged_p20_peak_1370	542	.	8.94991	54.2377	52.1171	40
1	15197332	15197401	3wt_3mu_merged_p20_peak_1371	227	.	5.34937	22.7074	20.8939	25
1	15197563	15197719	3wt_3mu_merged_p20_peak_1372	335	.	6.68672	33.5063	31.559	58
1	15226243	15226501	3wt_3mu_merged_p20_peak_1373	2486	.	23.867	248.625	245.913	72
1	15226958	15227068	3wt_3mu_merged_p20_peak_1374	1139	.	14.0781	113.999	111.598	64
1	15235785	15235874	3wt_3mu_merged_p20_peak_1375	219	.	5.2465	21.9303	20.1286	76
1	1524448	1524516	3wt_3mu_merged_p20_peak_203	572	.	9.25853	57.2657	55.1251	33
1	15252338	15252408	3wt_3mu_merged_p20_peak_1376	552	.	9.05278	55.2421	53.1148	50
1	15258617	15258973	3wt_3mu_merged_p20_peak_1377a	4830	.	29.052	483.001	479.996	86
1	15258617	15258973	3wt_3mu_merged_p20_peak_1377b	576	.	7.17482	57.6563	55.5139	282
1	15259048	15259172	3wt_3mu_merged_p20_peak_1378	380	.	5.63655	38.0412	36.0495	62
1	15265916	15266009	3wt_3mu_merged_p20_peak_1379	309	.	6.3781	30.9063	28.9874	29
1	15277989	15278074	3wt_3mu_merged_p20_peak_1380	502	.	8.53842	50.2699	48.1773	46
1	15286749	15286952	3wt_3mu_merged_p20_peak_1381	4306	.	33.7602	430.614	427.665	122
1	15303288	15303417	3wt_3mu_merged_p20_peak_1382	463	.	8.12693	46.3852	44.322	70
1	15315338	15315435	3wt_3mu_merged_p20_peak_1383	467	.	6.24776	46.7914	44.7262	36
1	15317005	15317181	3wt_3mu_merged_p20_peak_1384	880	.	9.17567	88.0126	85.711	99
1	15320157	15320283	3wt_3mu_merged_p20_peak_1385	1364	.	9.92434	136.433	133.962	74
1	15322838	15323099	3wt_3mu_merged_p20_peak_1386	4577	.	22.7459	457.774	454.795	136
1	15327786	15327865	3wt_3mu_merged_p20_peak_1387	399	.	4.73859	39.9577	37.9487	43
1	15329197	15329368	3wt_3mu_merged_p20_peak_1388	2018	.	16.0953	201.816	199.189	105
1	15330748	15331015	3wt_3mu_merged_p20_peak_1389	1153	.	11.5289	115.315	112.909	163
1	15359227	15359302	3wt_3mu_merged_p20_peak_1390	326	.	6.58384	32.6329	30.6949	26
1	15392803	15392928	3wt_3mu_merged_p20_peak_1391	492	.	8.43555	49.2908	47.2054	51
1	15406116	15406250	3wt_3mu_merged_p20_peak_1392	552	.	9.05278	55.2421	53.1148	85
1	1544935	1545083	3wt_3mu_merged_p20_peak_204	1905	.	20.5745	190.554	187.95	97
1	15460608	15460686	3wt_3mu_merged_p20_peak_1393	454	.	8.02406	45.4274	43.3718	36
1	15469435	15469497	3wt_3mu_merged_p20_peak_1394	572	.	9.25853	57.2657	55.1251	25
1	1552062	1552259	3wt_3mu_merged_p20_peak_205	874	.	12.139	87.4396	85.1399	77
1	15524638	15524750	3wt_3mu_merged_p20_peak_1395	2583	.	18.6994	258.328	255.6	68
1	15525233	15525392	3wt_3mu_merged_p20_peak_1396	2348	.	17.2457	234.822	232.133	66
1	15527765	15527841	3wt_3mu_merged_p20_peak_1397	308	.	5.07013	30.8988	28.9839	36
1	15539724	15539820	3wt_3mu_merged_p20_peak_1398	454	.	8.02406	45.4274	43.3718	45
1	15547825	15547901	3wt_3mu_merged_p20_peak_1399	326	.	6.58384	32.6329	30.6949	36
1	15550486	15550631	3wt_3mu_merged_p20_peak_1400a	227	.	5.34937	22.7074	20.8939	25
1	15550486	15550631	3wt_3mu_merged_p20_peak_1400b	352	.	6.89246	35.2727	33.3073	65
1	1558062	1558133	3wt_3mu_merged_p20_peak_206	463	.	8.12693	46.3852	44.322	55
1	15633816	15633893	3wt_3mu_merged_p20_peak_1401	283	.	6.06948	28.3687	26.4793	34
1	15643877	15643975	3wt_3mu_merged_p20_peak_1402	762	.	11.1102	76.2934	74.0452	54
1	15648001	15648130	3wt_3mu_merged_p20_peak_1403	966	.	12.9619	96.6218	94.2839	49
1	15725629	15725691	3wt_3mu_merged_p20_peak_1404	397	.	7.40682	39.7993	37.7912	27
1	157480	157602	3wt_3mu_merged_p20_peak_40	6519	.	26.4519	651.998	648.84	56
1	15758178	15758277	3wt_3mu_merged_p20_peak_1405	292	.	6.17235	29.2075	27.308	33
1	15758390	15758564	3wt_3mu_merged_p20_peak_1406	502	.	8.53842	50.2699	48.1773	99
1	157702	157943	3wt_3mu_merged_p20_peak_41a	1480	.	9.80575	148.007	145.504	57
1	157702	157943	3wt_3mu_merged_p20_peak_41b	883	.	7.19838	88.3058	86.0033	153
1	15775224	15775279	3wt_3mu_merged_p20_peak_1407	300	.	6.27523	30.0534	28.1441	17
1	15801667	15801768	3wt_3mu_merged_p20_peak_1408	571	.	8.84068	57.1399	55.0019	39
1	15804083	15804202	3wt_3mu_merged_p20_peak_1409a	282	.	5.93754	28.2472	26.363	39
1	15804083	15804202	3wt_3mu_merged_p20_peak_1409b	359	.	6.82817	35.9363	33.967	93
1	15815091	15815161	3wt_3mu_merged_p20_peak_1410	317	.	6.48097	31.7662	29.8377	28
1	15817273	15817336	3wt_3mu_merged_p20_peak_1411	275	.	5.96661	27.5371	25.658	56
1	15824556	15824811	3wt_3mu_merged_p20_peak_1412a	542	.	8.94991	54.2377	52.1171	54
1	15824556	15824811	3wt_3mu_merged_p20_peak_1412b	512	.	8.64129	51.2542	49.1545	204
1	15840074	15840372	3wt_3mu_merged_p20_peak_1413a	486	.	8.04935	48.6864	46.6065	73
1	15840074	15840372	3wt_3mu_merged_p20_peak_1413b	742	.	10.3791	74.2891	72.0512	137
1	15840074	15840372	3wt_3mu_merged_p20_peak_1413c	1305	.	14.8724	130.585	128.13	228
1	15843725	15843779	3wt_3mu_merged_p20_peak_1414	269	.	5.63206	26.9574	25.087	24
1	15852359	15852466	3wt_3mu_merged_p20_peak_1415	267	.	5.78163	26.7869	24.9176	28
1	15855244	15855317	3wt_3mu_merged_p20_peak_1416	214	.	4.94819	21.4377	19.6456	17
1	15855400	15855531	3wt_3mu_merged_p20_peak_1417	1694	.	17.9054	169.409	166.852	58
1	15872927	15873283	3wt_3mu_merged_p20_peak_1418a	331	.	6.50428	33.2	31.2584	20
1	15872927	15873283	3wt_3mu_merged_p20_peak_1418b	498	.	8.30608	49.8171	47.7292	183
1	15874893	15874979	3wt_3mu_merged_p20_peak_1419	350	.	6.52895	35.0953	33.1346	51
1	15886763	15886829	3wt_3mu_merged_p20_peak_1420	283	.	6.06948	28.3687	26.4793	37
1	15890915	15891038	3wt_3mu_merged_p20_peak_1421	1770	.	19.5458	177.048	174.473	76
1	15913770	15913913	3wt_3mu_merged_p20_peak_1422	1071	.	13.3854	107.14	104.763	77
1	15917032	15917241	3wt_3mu_merged_p20_peak_1423a	370	.	6.86225	37.0126	35.0334	36
1	15917032	15917241	3wt_3mu_merged_p20_peak_1423b	371	.	6.78017	37.1173	35.1342	161
1	1592263	1592315	3wt_3mu_merged_p20_peak_207	267	.	5.86373	26.713	24.8442	26
1	15926378	15926476	3wt_3mu_merged_p20_peak_1424	343	.	6.78959	34.3862	32.4298	56
1	15930680	15930817	3wt_3mu_merged_p20_peak_1425	492	.	8.43555	49.2908	47.2054	79
1	15940462	15940618	3wt_3mu_merged_p20_peak_1426	416	.	7.61257	41.6523	39.628	65
1	1594458	1594629	3wt_3mu_merged_p20_peak_208	454	.	8.02406	45.4274	43.3718	61
1	15947052	15947344	3wt_3mu_merged_p20_peak_1427	250	.	5.65799	25.0873	23.24	75
1	15947482	15947543	3wt_3mu_merged_p20_peak_1428	425	.	7.71544	42.5876	40.5553	29
1	15955650	15955739	3wt_3mu_merged_p20_peak_1429	444	.	7.92119	44.4752	42.4273	38
1	15964999	15965192	3wt_3mu_merged_p20_peak_1430	920	.	12.5505	92.0023	89.6832	99
1	1596823	1596912	3wt_3mu_merged_p20_peak_209	1192	.	14.9165	119.286	116.866	38
1	15970967	15971104	3wt_3mu_merged_p20_peak_1431	309	.	6.3781	30.9063	28.9874	79
1	15976347	15976429	3wt_3mu_merged_p20_peak_1432	572	.	9.25853	57.2657	55.1251	36
1	15997635	15997719	3wt_3mu_merged_p20_peak_1433	388	.	7.30395	38.8817	36.8819	54
1	15999438	15999506	3wt_3mu_merged_p20_peak_1434	292	.	6.17235	29.2075	27.308	50
1	16011258	16011333	3wt_3mu_merged_p20_peak_1435	552	.	9.05278	55.2421	53.1148	41
1	16040944	16041176	3wt_3mu_merged_p20_peak_1436a	889	.	11.2962	88.9116	86.6059	55
1	16040944	16041176	3wt_3mu_merged_p20_peak_1436b	428	.	7.20268	42.8166	40.7832	193
1	16041252	16041714	3wt_3mu_merged_p20_peak_1437a	331	.	6.18893	33.1301	31.189	39
1	16041252	16041714	3wt_3mu_merged_p20_peak_1437b	1016	.	12.3902	101.696	99.3387	376
1	1604577	1604750	3wt_3mu_merged_p20_peak_210	1144	.	14.505	114.42	112.017	58
1	1604819	1604928	3wt_3mu_merged_p20_peak_211	370	.	7.09821	37.0648	35.0819	70
1	16066286	16066498	3wt_3mu_merged_p20_peak_1438	603	.	9.56715	60.3368	58.1767	46
1	16073783	16073976	3wt_3mu_merged_p20_peak_1439	16389	.	66.2186	1638.91	1635.08	83
1	16074071	16074136	3wt_3mu_merged_p20_peak_1440	580	.	6.73457	58.0511	55.907	37
1	16084788	16085097	3wt_3mu_merged_p20_peak_1441a	292	.	6.17235	29.2075	27.308	64
1	16084788	16085097	3wt_3mu_merged_p20_peak_1441b	361	.	6.99533	36.1656	34.1914	180
1	16095707	16095931	3wt_3mu_merged_p20_peak_1442	1120	.	14.2993	112.005	109.61	137
1	16111936	16111998	3wt_3mu_merged_p20_peak_1443	326	.	6.58384	32.6329	30.6949	31
1	16125229	16125334	3wt_3mu_merged_p20_peak_1444	542	.	8.94991	54.2377	52.1171	63
1	16169963	16170019	3wt_3mu_merged_p20_peak_1445	874	.	12.139	87.4396	85.1399	25
1	16226714	16226781	3wt_3mu_merged_p20_peak_1446	361	.	6.99533	36.1656	34.1914	33
1	16231366	16231506	3wt_3mu_merged_p20_peak_1447	532	.	8.84704	53.2382	51.1244	31
1	16273041	16273231	3wt_3mu_merged_p20_peak_1448	502	.	8.53842	50.2699	48.1773	58
1	16291883	16292057	3wt_3mu_merged_p20_peak_1449	687	.	10.3901	68.7269	66.518	84
1	16343616	16343821	3wt_3mu_merged_p20_peak_1450	1884	.	18.8281	188.435	185.836	47
1	16343899	16344122	3wt_3mu_merged_p20_peak_1451	832	.	10.9253	83.2088	80.9282	62
1	1635504	1635692	3wt_3mu_merged_p20_peak_212	13723	.	68.7029	1372.38	1368.72	114
1	16361650	16361754	3wt_3mu_merged_p20_peak_1452	737	.	10.4058	73.7884	71.5539	52
1	16366586	16366652	3wt_3mu_merged_p20_peak_1453	309	.	6.3781	30.9063	28.9874	30
1	16374612	16374813	3wt_3mu_merged_p20_peak_1454a	227	.	5.34937	22.7074	20.8939	19
1	16374612	16374813	3wt_3mu_merged_p20_peak_1454b	807	.	11.5217	80.7059	78.4365	148
1	16388104	16388269	3wt_3mu_merged_p20_peak_1455	326	.	6.58384	32.6329	30.6949	58
1	16394187	16394323	3wt_3mu_merged_p20_peak_1456	643	.	5.44145	64.3844	62.2017	57
1	16394478	16394658	3wt_3mu_merged_p20_peak_1457	974	.	6.80189	97.4176	95.0773	85
1	16394927	16395138	3wt_3mu_merged_p20_peak_1458	2989	.	13.4801	298.964	296.175	62
1	16396899	16397094	3wt_3mu_merged_p20_peak_1459	5110	.	19.4817	511.054	508.022	98
1	16404131	16404220	3wt_3mu_merged_p20_peak_1460	397	.	7.40682	39.7993	37.7912	36
1	1640835	1641198	3wt_3mu_merged_p20_peak_213a	548	.	8.35142	54.8708	52.7473	43
1	1640835	1641198	3wt_3mu_merged_p20_peak_213b	756	.	10.1535	75.6925	73.448	167
1	1640835	1641198	3wt_3mu_merged_p20_peak_213c	3421	.	28.2241	342.123	339.276	256
1	16408717	16408832	3wt_3mu_merged_p20_peak_1461	483	.	8.33268	48.3169	46.2388	33
1	16410530	16410649	3wt_3mu_merged_p20_peak_1462	676	.	10.2873	67.6627	65.4597	68
1	16410725	16410866	3wt_3mu_merged_p20_peak_1463	593	.	9.46427	59.3084	57.1547	71
1	1641384	1641437	3wt_3mu_merged_p20_peak_214	404	.	6.90042	40.4549	38.4432	26
1	164220	164308	3wt_3mu_merged_p20_peak_42	425	.	6.03692	42.505	40.476	47
1	16458013	16458097	3wt_3mu_merged_p20_peak_1464	3454	.	18.6223	345.417	342.566	44
1	16458415	16458675	3wt_3mu_merged_p20_peak_1465a	5490	.	21.5814	549.025	545.958	64
1	16458415	16458675	3wt_3mu_merged_p20_peak_1465b	1265	.	8.28615	126.534	124.092	206
1	16463061	16463166	3wt_3mu_merged_p20_peak_1466	6623	.	27.2515	662.313	659.147	41
1	16463301	16463365	3wt_3mu_merged_p20_peak_1467	205	.	3.46244	20.5251	18.7465	30
1	16487658	16487710	3wt_3mu_merged_p20_peak_1468	267	.	5.86373	26.713	24.8442	40
1	1650060	1650168	3wt_3mu_merged_p20_peak_215	446	.	7.61628	44.6962	42.6472	69
1	16507296	16507384	3wt_3mu_merged_p20_peak_1469	850	.	5.44296	85.0442	82.7562	55
1	16507613	16508114	3wt_3mu_merged_p20_peak_1470a	9276	.	24.0474	927.641	924.276	174
1	16507613	16508114	3wt_3mu_merged_p20_peak_1470b	11693	.	28.343	1169.37	1165.84	296
1	16507613	16508114	3wt_3mu_merged_p20_peak_1470c	5680	.	17.1767	568.065	564.98	398
1	16519378	16519505	3wt_3mu_merged_p20_peak_1471	568	.	8.53907	56.8492	54.7125	94
1	16519795	16520094	3wt_3mu_merged_p20_peak_1472a	679	.	9.55257	67.9591	65.7549	59
1	16519795	16520094	3wt_3mu_merged_p20_peak_1472b	6253	.	44.5865	625.351	622.215	158
1	1652613	1652698	3wt_3mu_merged_p20_peak_216	450	.	7.48167	45.0895	43.0384	44
1	16555711	16556013	3wt_3mu_merged_p20_peak_1473a	1108	.	14.1964	110.803	108.412	51
1	16555711	16556013	3wt_3mu_merged_p20_peak_1473b	227	.	5.34937	22.7074	20.8939	181
1	16555711	16556013	3wt_3mu_merged_p20_peak_1473c	795	.	11.4189	79.5969	77.3328	264
1	16571575	16571801	3wt_3mu_merged_p20_peak_1474	2331	.	9.52048	233.131	230.445	108
1	16573705	16574002	3wt_3mu_merged_p20_peak_1475	16090	.	34.4825	1609.08	1605.27	114
1	16574440	16574554	3wt_3mu_merged_p20_peak_1476	609	.	4.47664	60.9899	58.827	56
1	16576376	16576538	3wt_3mu_merged_p20_peak_1477	683	.	4.7846	68.3607	66.1549	70
1	16582414	16582643	3wt_3mu_merged_p20_peak_1478a	942	.	12.7473	94.266	91.9387	72
1	16582414	16582643	3wt_3mu_merged_p20_peak_1478b	300	.	6.27523	30.0534	28.1441	199
1	16585680	16585866	3wt_3mu_merged_p20_peak_1479a	996	.	12.9928	99.6045	97.2555	32
1	16585680	16585866	3wt_3mu_merged_p20_peak_1479b	1345	.	15.8745	134.512	132.046	129
1	16599558	16599729	3wt_3mu_merged_p20_peak_1480	2028	.	21.5004	202.895	200.266	75
1	1661450	1661558	3wt_3mu_merged_p20_peak_217	579	.	6.78928	57.9677	55.824	69
1	16616346	16616438	3wt_3mu_merged_p20_peak_1481	1001	.	13.2706	100.122	97.7709	49
1	16621063	16621125	3wt_3mu_merged_p20_peak_1482	512	.	8.64129	51.2542	49.1545	32
1	16621299	16621378	3wt_3mu_merged_p20_peak_1483	1404	.	16.6654	140.483	138	40
1	16621698	16621760	3wt_3mu_merged_p20_peak_1484	603	.	9.56715	60.3368	58.1767	31
1	1662449	1662857	3wt_3mu_merged_p20_peak_218a	1076	.	10.0628	107.676	105.296	54
1	1662449	1662857	3wt_3mu_merged_p20_peak_218b	3966	.	24.0081	396.698	393.786	322
1	16642726	16642805	3wt_3mu_merged_p20_peak_1485	1132	.	14.4022	113.211	110.812	44
1	16664878	16665088	3wt_3mu_merged_p20_peak_1486	3253	.	30.1417	325.368	322.543	135
1	16667396	16667526	3wt_3mu_merged_p20_peak_1487	1132	.	12.8699	113.219	110.82	58
1	16667614	16667671	3wt_3mu_merged_p20_peak_1488	651	.	8.97559	65.123	62.9354	24
1	16671312	16671427	3wt_3mu_merged_p20_peak_1489	1048	.	13.682	104.837	102.468	42
1	16671769	16671870	3wt_3mu_merged_p20_peak_1490	931	.	12.6533	93.1519	90.8281	35
1	16688873	16689209	3wt_3mu_merged_p20_peak_1491a	5199	.	33.7267	519.983	516.943	134
1	16688873	16689209	3wt_3mu_merged_p20_peak_1491b	649	.	8.31488	64.924	62.7371	260
1	16701210	16701368	3wt_3mu_merged_p20_peak_1492	593	.	9.46427	59.3084	57.1547	65
1	16714613	16714967	3wt_3mu_merged_p20_peak_1493	3763	.	31.2168	376.31	373.421	198
1	16715033	16715094	3wt_3mu_merged_p20_peak_1494	316	.	6.15587	31.6996	29.7754	25
1	16724304	16724516	3wt_3mu_merged_p20_peak_1495	2806	.	23.9219	280.614	277.851	71
1	16728267	16728332	3wt_3mu_merged_p20_peak_1496	235	.	5.37868	23.5793	21.7537	29
1	16736026	16736088	3wt_3mu_merged_p20_peak_1497	352	.	6.89246	35.2727	33.3073	28
1	16736147	16736239	3wt_3mu_merged_p20_peak_1498	370	.	7.09821	37.0648	35.0819	46
1	16764637	16764971	3wt_3mu_merged_p20_peak_1499a	562	.	9.15566	56.2515	54.1174	40
1	16764637	16764971	3wt_3mu_merged_p20_peak_1499b	454	.	8.02406	45.4274	43.3718	147
1	16764637	16764971	3wt_3mu_merged_p20_peak_1499c	416	.	7.61257	41.6523	39.628	246
1	16764637	16764971	3wt_3mu_merged_p20_peak_1499d	444	.	7.92119	44.4752	42.4273	297
1	16770068	16770201	3wt_3mu_merged_p20_peak_1500	463	.	8.12693	46.3852	44.322	78
1	1679055	1679152	3wt_3mu_merged_p20_peak_219	444	.	7.92119	44.4752	42.4273	39
1	16863	16931	3wt_3mu_merged_p20_peak_6	1241	.	6.03166	124.191	121.757	38
1	16869495	16869579	3wt_3mu_merged_p20_peak_1501	438	.	7.76698	43.8258	41.7841	55
1	16873259	16873350	3wt_3mu_merged_p20_peak_1502	374	.	6.74116	37.4041	35.4193	33
1	16877656	16877760	3wt_3mu_merged_p20_peak_1503	512	.	8.64129	51.2542	49.1545	55
1	16916782	16917063	3wt_3mu_merged_p20_peak_1504a	246	.	5.36763	24.6679	22.8288	36
1	16916782	16917063	3wt_3mu_merged_p20_peak_1504b	489	.	7.98072	48.902	46.8211	225
1	16952585	16952679	3wt_3mu_merged_p20_peak_1505	613	.	9.67002	61.3699	59.2034	38
1	16964290	16964383	3wt_3mu_merged_p20_peak_1506	343	.	6.78959	34.3862	32.4298	25
1	16976548	16976796	3wt_3mu_merged_p20_peak_1507	1132	.	14.4022	113.211	110.812	71
1	16982369	16982573	3wt_3mu_merged_p20_peak_1508	267	.	5.86373	26.713	24.8442	48
1	16999146	16999200	3wt_3mu_merged_p20_peak_1509	267	.	5.86373	26.713	24.8442	42
1	17010620	17010883	3wt_3mu_merged_p20_peak_1510	1837	.	20.0601	183.773	181.183	59
1	17012067	17012206	3wt_3mu_merged_p20_peak_1511	1344	.	14.5745	134.441	131.975	51
1	17016084	17016171	3wt_3mu_merged_p20_peak_1512	624	.	9.77289	62.4075	60.2348	40
1	17040633	17040878	3wt_3mu_merged_p20_peak_1513	1546	.	17.7969	154.616	152.096	144
1	17059697	17059758	3wt_3mu_merged_p20_peak_1514	343	.	6.78959	34.3862	32.4298	34
1	17063061	17063214	3wt_3mu_merged_p20_peak_1515	655	.	10.0815	65.5474	63.3563	67
1	17081068	17081147	3wt_3mu_merged_p20_peak_1516	352	.	6.89246	35.2727	33.3073	53
1	17081422	17081552	3wt_3mu_merged_p20_peak_1517	885	.	12.2418	88.5748	86.2702	68
1	1708935	1709202	3wt_3mu_merged_p20_peak_220	3790	.	12.031	379.01	376.118	68
1	17094872	17095056	3wt_3mu_merged_p20_peak_1518	532	.	8.84704	53.2382	51.1244	81
1	17102077	17102319	3wt_3mu_merged_p20_peak_1519	1468	.	16.6331	146.832	144.332	91
1	17103762	17103881	3wt_3mu_merged_p20_peak_1520	352	.	6.5546	35.2089	33.2475	91
1	17115	17187	3wt_3mu_merged_p20_peak_7	412	.	3.63155	41.2964	39.277	33
1	1711960	1712178	3wt_3mu_merged_p20_peak_221	12911	.	23.315	1291.17	1287.56	115
1	1713464	1713704	3wt_3mu_merged_p20_peak_222a	1056	.	5.00373	105.666	103.295	67
1	1713464	1713704	3wt_3mu_merged_p20_peak_222b	3510	.	9.86888	351.098	348.24	180
1	1714010	1714166	3wt_3mu_merged_p20_peak_223	851	.	4.7606	85.1233	82.835	110
1	1714842	1715050	3wt_3mu_merged_p20_peak_224	4375	.	12.698	437.526	434.568	128
1	17152105	17152192	3wt_3mu_merged_p20_peak_1521	335	.	6.68672	33.5063	31.559	42
1	17157021	17157154	3wt_3mu_merged_p20_peak_1522	335	.	6.68672	33.5063	31.559	44
1	17163700	17163805	3wt_3mu_merged_p20_peak_1523	352	.	6.89246	35.2727	33.3073	52
1	171650	172094	3wt_3mu_merged_p20_peak_43a	5090	.	16.36	509.083	506.053	63
1	171650	172094	3wt_3mu_merged_p20_peak_43b	1373	.	7.20743	137.323	134.849	201
1	171650	172094	3wt_3mu_merged_p20_peak_43c	1228	.	6.76513	122.807	120.377	367
1	17221514	17221648	3wt_3mu_merged_p20_peak_1524	532	.	8.84704	53.2382	51.1244	67
1	17236905	17236983	3wt_3mu_merged_p20_peak_1525	317	.	6.48097	31.7662	29.8377	47
1	17253692	17253863	3wt_3mu_merged_p20_peak_1526	275	.	5.58867	27.5544	25.6751	36
1	17253986	17254282	3wt_3mu_merged_p20_peak_1527a	811	.	10.756	81.1137	78.8429	33
1	17253986	17254282	3wt_3mu_merged_p20_peak_1527b	303	.	5.93912	30.3218	28.4107	167
1	17253986	17254282	3wt_3mu_merged_p20_peak_1527c	217	.	4.93404	21.7267	19.9322	242
1	17261613	17261794	3wt_3mu_merged_p20_peak_1528	666	.	10.1844	66.6029	64.4057	99
1	17265622	17265706	3wt_3mu_merged_p20_peak_1529	397	.	7.40682	39.7993	37.7912	37
1	17273080	17273171	3wt_3mu_merged_p20_peak_1530	370	.	7.09821	37.0648	35.0819	29
1	17273277	17273346	3wt_3mu_merged_p20_peak_1531	361	.	6.99533	36.1656	34.1914	30
1	17277169	17277369	3wt_3mu_merged_p20_peak_1532	562	.	9.15566	56.2515	54.1174	113
1	17292368	17292460	3wt_3mu_merged_p20_peak_1533a	267	.	5.86373	26.713	24.8442	18
1	17292368	17292460	3wt_3mu_merged_p20_peak_1533b	267	.	5.86373	26.713	24.8442	73
1	17326795	17326872	3wt_3mu_merged_p20_peak_1534	300	.	6.27523	30.0534	28.1441	36
1	17341232	17341380	3wt_3mu_merged_p20_peak_1535	582	.	9.3614	58.2847	56.1375	49
1	17374645	17374843	3wt_3mu_merged_p20_peak_1536	7093	.	25.2705	709.3	706.096	99
1	17375229	17375373	3wt_3mu_merged_p20_peak_1537	4689	.	18.6755	468.926	465.936	94
1	17376787	17376951	3wt_3mu_merged_p20_peak_1538	2636	.	12.522	263.633	260.897	83
1	17382510	17382592	3wt_3mu_merged_p20_peak_1539	251	.	4.84447	25.107	23.2596	27
1	17382813	17382945	3wt_3mu_merged_p20_peak_1540	1254	.	12.65	125.416	122.978	93
1	17383637	17383709	3wt_3mu_merged_p20_peak_1541	468	.	6.8756	46.8773	44.8116	29
1	1739107	1739212	3wt_3mu_merged_p20_peak_225	582	.	9.3614	58.2847	56.1375	39
1	17391863	17392024	3wt_3mu_merged_p20_peak_1542	1810	.	19.4586	181.034	178.451	81
1	17392249	17392369	3wt_3mu_merged_p20_peak_1543	261	.	5.62431	26.1356	24.2758	30
1	17401410	17401475	3wt_3mu_merged_p20_peak_1544	323	.	6.11217	32.3553	30.423	33
1	17404993	17405087	3wt_3mu_merged_p20_peak_1545	326	.	6.58384	32.6329	30.6949	35
1	17406286	17406375	3wt_3mu_merged_p20_peak_1546	336	.	6.20131	33.6156	31.6677	64
1	17410637	17410882	3wt_3mu_merged_p20_peak_1547a	415	.	7.24923	41.5727	39.5518	94
1	17410637	17410882	3wt_3mu_merged_p20_peak_1547b	201	.	4.80262	20.1397	18.3704	190
1	17415305	17415505	3wt_3mu_merged_p20_peak_1548a	300	.	6.27523	30.0534	28.1441	18
1	17415305	17415505	3wt_3mu_merged_p20_peak_1548b	532	.	8.84704	53.2382	51.1244	117
1	17428108	17428197	3wt_3mu_merged_p20_peak_1549	316	.	5.95496	31.6362	29.7124	29
1	17429962	17430140	3wt_3mu_merged_p20_peak_1550	748	.	9.86917	74.8939	72.6538	105
1	17437580	17437705	3wt_3mu_merged_p20_peak_1551	619	.	7.31601	61.9645	59.7956	63
1	17438052	17438119	3wt_3mu_merged_p20_peak_1552	463	.	6.11584	46.3761	44.3157	27
1	17440613	17440925	3wt_3mu_merged_p20_peak_1553a	588	.	6.9831	58.8088	56.6593	31
1	17440613	17440925	3wt_3mu_merged_p20_peak_1553b	1255	.	11.0889	125.582	123.142	199
1	17451942	17452086	3wt_3mu_merged_p20_peak_1554	492	.	8.43555	49.2908	47.2054	39
1	1745741	1745952	3wt_3mu_merged_p20_peak_226	1217	.	15.1223	121.737	119.309	140
1	17458285	17458440	3wt_3mu_merged_p20_peak_1555	822	.	10.1064	82.2086	79.9327	57
1	17458957	17459156	3wt_3mu_merged_p20_peak_1556	1254	.	12.655	125.445	123.006	90
1	17459268	17459343	3wt_3mu_merged_p20_peak_1557	276	.	4.93838	27.6784	25.7983	22
1	17464264	17464395	3wt_3mu_merged_p20_peak_1558	425	.	6.50447	42.58	40.5507	81
1	17467286	17467384	3wt_3mu_merged_p20_peak_1559	548	.	7.62135	54.8247	52.7014	51
1	17471282	17471389	3wt_3mu_merged_p20_peak_1560	361	.	6.99533	36.1656	34.1914	19
1	17474631	17474737	3wt_3mu_merged_p20_peak_1561	593	.	9.46427	59.3084	57.1547	25
1	174776	175003	3wt_3mu_merged_p20_peak_44	6317	.	19.6243	631.735	628.594	85
1	17486622	17486721	3wt_3mu_merged_p20_peak_1562	808	.	9.74113	80.8367	78.5669	57
1	17489911	17490042	3wt_3mu_merged_p20_peak_1563	855	.	10.6243	85.5399	83.249	76
1	17490133	17490232	3wt_3mu_merged_p20_peak_1564	606	.	8.63467	60.6163	58.455	46
1	17503650	17503768	3wt_3mu_merged_p20_peak_1565	829	.	11.7275	82.9354	80.6557	65
1	17509696	17509846	3wt_3mu_merged_p20_peak_1566a	267	.	5.86373	26.713	24.8442	33
1	17509696	17509846	3wt_3mu_merged_p20_peak_1566b	204	.	5.04075	20.4014	18.6238	111
1	1751657	1751917	3wt_3mu_merged_p20_peak_227a	538	.	7.02763	53.8764	51.7597	32
1	1751657	1751917	3wt_3mu_merged_p20_peak_227b	2322	.	17.7194	232.202	229.518	184
1	17522059	17522112	3wt_3mu_merged_p20_peak_1567	211	.	5.14363	21.1616	19.3718	25
1	17527186	17527423	3wt_3mu_merged_p20_peak_1568	3870	.	19.4567	387.058	384.157	109
1	17527759	17527826	3wt_3mu_merged_p20_peak_1569	400	.	4.95263	40.0014	37.9922	32
1	17527926	17528058	3wt_3mu_merged_p20_peak_1570	3848	.	19.7838	384.859	381.96	72
1	17528174	17528264	3wt_3mu_merged_p20_peak_1571	1424	.	10.2591	142.489	140.001	54
1	17539349	17539462	3wt_3mu_merged_p20_peak_1572	730	.	10.8016	73.0259	70.7942	78
1	17539535	17539642	3wt_3mu_merged_p20_peak_1573	676	.	10.2873	67.6627	65.4597	28
1	1754610	1754801	3wt_3mu_merged_p20_peak_228	742	.	8.17652	74.2499	72.0121	81
1	17547018	17547176	3wt_3mu_merged_p20_peak_1574	1824	.	19.9573	182.423	179.837	91
1	17569845	17569898	3wt_3mu_merged_p20_peak_1575	473	.	8.2298	47.3483	45.2776	25
1	17570171	17570266	3wt_3mu_merged_p20_peak_1576	522	.	8.74417	52.2437	50.1369	45
1	17574335	17574538	3wt_3mu_merged_p20_peak_1577	851	.	11.9332	85.18	82.8902	84
1	17584823	17584948	3wt_3mu_merged_p20_peak_1578a	353	.	4.46576	35.3891	33.423	42
1	17584823	17584948	3wt_3mu_merged_p20_peak_1578b	526	.	5.49384	52.6081	50.4995	89
1	17585113	17585205	3wt_3mu_merged_p20_peak_1579	546	.	5.5974	54.6852	52.5626	37
1	17587174	17587314	3wt_3mu_merged_p20_peak_1580	746	.	6.06506	74.6915	72.4521	46
1	17587502	17587697	3wt_3mu_merged_p20_peak_1581	13858	.	40.9054	1385.89	1382.22	95
1	17590248	17590388	3wt_3mu_merged_p20_peak_1582	2102	.	11.3332	210.284	207.64	67
1	17626917	17627136	3wt_3mu_merged_p20_peak_1583	780	.	10.9191	78.0325	75.7767	143
1	17630299	17630489	3wt_3mu_merged_p20_peak_1584a	601	.	9.38249	60.1265	57.9693	36
1	17630299	17630489	3wt_3mu_merged_p20_peak_1584b	491	.	8.28454	49.1868	47.1044	137
1	17635127	17635206	3wt_3mu_merged_p20_peak_1585	292	.	6.17235	29.2075	27.308	26
1	17640430	17640631	3wt_3mu_merged_p20_peak_1586	829	.	11.7275	82.9354	80.6557	131
1	17646460	17646582	3wt_3mu_merged_p20_peak_1587	258	.	5.76086	25.8963	24.0382	23
1	1765985	1766291	3wt_3mu_merged_p20_peak_229	7159	.	42.0122	715.94	712.731	119
1	17663481	17663537	3wt_3mu_merged_p20_peak_1588	603	.	9.56715	60.3368	58.1767	25
1	17670356	17670603	3wt_3mu_merged_p20_peak_1589	1191	.	13.0506	119.143	116.725	88
1	17673666	17673730	3wt_3mu_merged_p20_peak_1590	625	.	8.3827	62.597	60.4235	30
1	17675002	17675119	3wt_3mu_merged_p20_peak_1591	406	.	6.46792	40.6036	38.591	63
1	17686857	17686932	3wt_3mu_merged_p20_peak_1592	352	.	6.89246	35.2727	33.3073	34
1	17693202	17693449	3wt_3mu_merged_p20_peak_1593a	4248	.	16.09	424.805	421.861	64
1	17693202	17693449	3wt_3mu_merged_p20_peak_1593b	348	.	3.8039	34.8166	32.8576	219
1	17695269	17695516	3wt_3mu_merged_p20_peak_1594	15310	.	39.9789	1531.03	1527.27	91
1	17695800	17695865	3wt_3mu_merged_p20_peak_1595	749	.	5.6539	74.9784	72.7379	32
1	17711597	17711834	3wt_3mu_merged_p20_peak_1596	9992	.	50.5528	999.26	995.846	68
1	1772439	1772535	3wt_3mu_merged_p20_peak_230	352	.	6.89246	35.2727	33.3073	51
1	17749958	17750082	3wt_3mu_merged_p20_peak_1597	1258	.	14.3625	125.824	123.384	72
1	17762532	17762785	3wt_3mu_merged_p20_peak_1598a	442	.	5.67546	44.2403	42.1965	39
1	17762532	17762785	3wt_3mu_merged_p20_peak_1598b	501	.	6.10706	50.1341	48.0446	186
1	1776310	1776385	3wt_3mu_merged_p20_peak_231	309	.	6.3781	30.9063	28.9874	63
1	17766482	17766618	3wt_3mu_merged_p20_peak_1599	2233	.	14.9573	223.322	220.654	72
1	17766707	17766864	3wt_3mu_merged_p20_peak_1600	1525	.	11.8608	152.504	149.989	83
1	17781055	17781306	3wt_3mu_merged_p20_peak_1601a	1180	.	14.8136	118.065	115.649	59
1	17781055	17781306	3wt_3mu_merged_p20_peak_1601b	1730	.	19.2372	173.04	170.474	131
1	17794486	17794558	3wt_3mu_merged_p20_peak_1602	388	.	7.30395	38.8817	36.8819	36
1	17811630	17811760	3wt_3mu_merged_p20_peak_1603	483	.	8.33268	48.3169	46.2388	61
1	17827020	17827100	3wt_3mu_merged_p20_peak_1604	343	.	6.78959	34.3862	32.4298	26
1	17858149	17858843	3wt_3mu_merged_p20_peak_1605a	4606	.	12.6921	460.632	457.65	200
1	17858149	17858843	3wt_3mu_merged_p20_peak_1605b	19094	.	33.6656	1909.45	1905.45	563
1	17870113	17870179	3wt_3mu_merged_p20_peak_1606	227	.	5.34937	22.7074	20.8939	36
1	17872489	17872620	3wt_3mu_merged_p20_peak_1607	572	.	9.25853	57.2657	55.1251	58
1	17879119	17879330	3wt_3mu_merged_p20_peak_1608a	773	.	11.2131	77.3906	75.1371	46
1	17879119	17879330	3wt_3mu_merged_p20_peak_1608b	444	.	7.92119	44.4752	42.4273	139
1	17889406	17889552	3wt_3mu_merged_p20_peak_1609	692	.	7.72949	69.2001	66.9894	65
1	17889852	17890069	3wt_3mu_merged_p20_peak_1610	7705	.	38.9465	770.564	767.312	99
1	17898908	17899027	3wt_3mu_merged_p20_peak_1611	784	.	11.316	78.4918	76.233	71
1	17915783	17915952	3wt_3mu_merged_p20_peak_1612	2322	.	22.4288	232.235	229.551	51
1	17948569	17948677	3wt_3mu_merged_p20_peak_1613	495	.	7.99976	49.5116	47.4251	45
1	17951483	17951552	3wt_3mu_merged_p20_peak_1614	375	.	6.78387	37.5956	35.6097	27
1	17979845	17979938	3wt_3mu_merged_p20_peak_1615	361	.	6.99533	36.1656	34.1914	41
1	18005903	18006000	3wt_3mu_merged_p20_peak_1616	444	.	7.92119	44.4752	42.4273	47
1	18035549	18035684	3wt_3mu_merged_p20_peak_1617	343	.	6.78959	34.3862	32.4298	30
1	18051392	18051476	3wt_3mu_merged_p20_peak_1618	416	.	7.61257	41.6523	39.628	42
1	18072271	18072651	3wt_3mu_merged_p20_peak_1619a	388	.	7.30395	38.8817	36.8819	45
1	18072271	18072651	3wt_3mu_merged_p20_peak_1619b	343	.	6.78959	34.3862	32.4298	200
1	18072271	18072651	3wt_3mu_merged_p20_peak_1619c	352	.	6.89246	35.2727	33.3073	351
1	18104762	18104820	3wt_3mu_merged_p20_peak_1620	291	.	5.95016	29.1279	27.2333	27
1	18105170	18105222	3wt_3mu_merged_p20_peak_1621	330	.	6.36433	33.0429	31.1024	27
1	18126977	18127038	3wt_3mu_merged_p20_peak_1622	200	.	4.41624	20.0478	18.2792	9
1	18127514	18127774	3wt_3mu_merged_p20_peak_1623	1328	.	13.8534	132.89	130.429	168
1	18134351	18134405	3wt_3mu_merged_p20_peak_1624	234	.	5.45224	23.4927	21.6677	43
1	18147548	18147695	3wt_3mu_merged_p20_peak_1625	512	.	8.64129	51.2542	49.1545	47
1	18157333	18157485	3wt_3mu_merged_p20_peak_1626	510	.	8.09887	51.0187	48.9224	78
1	18176986	18177146	3wt_3mu_merged_p20_peak_1627	2207	.	21.4061	220.772	218.109	102
1	18180361	18180489	3wt_3mu_merged_p20_peak_1628	914	.	10.5506	91.4618	89.1456	65
1	18181996	18182185	3wt_3mu_merged_p20_peak_1629	976	.	12.1233	97.639	95.298	87
1	18189088	18189342	3wt_3mu_merged_p20_peak_1630a	309	.	6.3781	30.9063	28.9874	53
1	18189088	18189342	3wt_3mu_merged_p20_peak_1630b	397	.	7.40682	39.7993	37.7912	194
1	18221935	18222070	3wt_3mu_merged_p20_peak_1631	3467	.	31.5598	346.79	343.937	89
1	18237665	18237784	3wt_3mu_merged_p20_peak_1632	762	.	11.1102	76.2934	74.0452	76
1	18255828	18256001	3wt_3mu_merged_p20_peak_1633	502	.	8.53842	50.2699	48.1773	98
1	18260474	18260654	3wt_3mu_merged_p20_peak_1634	388	.	7.30395	38.8817	36.8819	137
1	18283469	18283620	3wt_3mu_merged_p20_peak_1635	290	.	6.12183	29.003	27.1093	54
1	18313803	18313913	3wt_3mu_merged_p20_peak_1636	572	.	9.25853	57.2657	55.1251	34
1	18319045	18319121	3wt_3mu_merged_p20_peak_1637	370	.	7.09821	37.0648	35.0819	36
1	18319522	18319596	3wt_3mu_merged_p20_peak_1638	204	.	5.04075	20.4014	18.6238	3
1	18332465	18332604	3wt_3mu_merged_p20_peak_1639	327	.	5.02894	32.7885	30.8496	107
1	18333738	18333798	3wt_3mu_merged_p20_peak_1640	717	.	7.72672	71.7351	69.5114	33
1	18336770	18336993	3wt_3mu_merged_p20_peak_1641	3075	.	19.3815	307.546	304.745	109
1	18347382	18347528	3wt_3mu_merged_p20_peak_1642	2570	.	24.2134	257.031	254.305	91
1	18361659	18361766	3wt_3mu_merged_p20_peak_1643	383	.	6.96202	38.3851	36.3914	78
1	18362289	18362382	3wt_3mu_merged_p20_peak_1644	434	.	7.5522	43.4068	41.3702	40
1	18367800	18367860	3wt_3mu_merged_p20_peak_1645	300	.	6.17069	30.0553	28.1459	25
1	18368002	18368163	3wt_3mu_merged_p20_peak_1646a	593	.	9.46427	59.3084	57.1547	40
1	18368002	18368163	3wt_3mu_merged_p20_peak_1646b	613	.	9.67002	61.3699	59.2034	98
1	18392662	18392776	3wt_3mu_merged_p20_peak_1647	685	.	10.197	68.506	66.2997	57
1	18392842	18392912	3wt_3mu_merged_p20_peak_1648	276	.	5.89364	27.6539	25.7739	22
1	18396334	18396394	3wt_3mu_merged_p20_peak_1649	280	.	5.70464	28.0668	26.1839	21
1	18403164	18403612	3wt_3mu_merged_p20_peak_1650a	2211	.	15.689	221.199	218.535	156
1	18403164	18403612	3wt_3mu_merged_p20_peak_1650b	1790	.	13.6035	179.056	176.477	231
1	18403164	18403612	3wt_3mu_merged_p20_peak_1650c	320	.	4.86574	32.0933	30.1627	385
1	18403985	18404064	3wt_3mu_merged_p20_peak_1651	239	.	4.14094	23.9289	22.1006	17
1	18409191	18409381	3wt_3mu_merged_p20_peak_1652	1903	.	16.4478	190.383	187.779	99
1	18424488	18424799	3wt_3mu_merged_p20_peak_1653	962	.	12.2723	96.2899	93.9541	107
1	18440482	18440641	3wt_3mu_merged_p20_peak_1654	552	.	8.65919	55.2029	53.0779	40
1	18445527	18445849	3wt_3mu_merged_p20_peak_1655a	373	.	4.01177	37.3279	35.3436	28
1	18445527	18445849	3wt_3mu_merged_p20_peak_1655b	598	.	5.16312	59.8389	57.6829	251
1	18445937	18446350	3wt_3mu_merged_p20_peak_1656a	974	.	6.76803	97.4899	95.1493	71
1	18445937	18446350	3wt_3mu_merged_p20_peak_1656b	12065	.	35.7011	1206.58	1203.03	324
1	18452091	18452149	3wt_3mu_merged_p20_peak_1657	283	.	6.06948	28.3687	26.4793	29
1	18458802	18459082	3wt_3mu_merged_p20_peak_1658a	651	.	9.57491	65.1055	62.918	68
1	18458802	18459082	3wt_3mu_merged_p20_peak_1658b	455	.	7.58328	45.5556	43.4994	247
1	18463000	18463105	3wt_3mu_merged_p20_peak_1659	822	.	11.5665	82.2314	79.9554	38
1	18535035	18535161	3wt_3mu_merged_p20_peak_1660	634	.	9.87576	63.4496	61.2707	37
1	18543513	18543671	3wt_3mu_merged_p20_peak_1661	719	.	10.6987	71.9449	69.7188	67
1	18544099	18544167	3wt_3mu_merged_p20_peak_1662	582	.	9.3614	58.2847	56.1375	43
1	18570196	18570360	3wt_3mu_merged_p20_peak_1663	687	.	10.3901	68.7269	66.518	89
1	18576	18712	3wt_3mu_merged_p20_peak_8	2141	.	8.95978	214.167	211.516	84
1	18586532	18586637	3wt_3mu_merged_p20_peak_1664	289	.	5.72027	28.9359	27.0426	52
1	18591244	18591411	3wt_3mu_merged_p20_peak_1665	5298	.	30.6232	529.881	526.831	71
1	18591861	18591997	3wt_3mu_merged_p20_peak_1666	2026	.	16.2198	202.634	200.005	54
1	18592295	18592424	3wt_3mu_merged_p20_peak_1667	1822	.	15.5147	182.242	179.656	56
1	18598791	18598850	3wt_3mu_merged_p20_peak_1668	483	.	8.33268	48.3169	46.2388	37
1	18601475	18601590	3wt_3mu_merged_p20_peak_1669	491	.	8.26507	49.1027	47.0207	57
1	18606418	18606564	3wt_3mu_merged_p20_peak_1670	352	.	6.89246	35.2727	33.3073	31
1	18613238	18613399	3wt_3mu_merged_p20_peak_1671	443	.	6.43069	44.3932	42.3485	88
1	18615067	18615353	3wt_3mu_merged_p20_peak_1672	3252	.	23.3651	325.222	322.398	77
1	18695077	18695291	3wt_3mu_merged_p20_peak_1673a	773	.	11.2131	77.3906	75.1371	31
1	18695077	18695291	3wt_3mu_merged_p20_peak_1673b	211	.	5.14363	21.1616	19.3718	202
1	18697518	18697574	3wt_3mu_merged_p20_peak_1674	532	.	8.23192	53.2325	51.121	27
1	18697795	18697908	3wt_3mu_merged_p20_peak_1675	916	.	11.4414	91.6044	89.2877	60
1	18704490	18704682	3wt_3mu_merged_p20_peak_1676	435	.	7.81831	43.5285	41.4884	75
1	18710759	18710908	3wt_3mu_merged_p20_peak_1677	655	.	10.0815	65.5474	63.3563	93
1	18711756	18711859	3wt_3mu_merged_p20_peak_1678	1055	.	13.6684	105.509	103.138	62
1	18716190	18716287	3wt_3mu_merged_p20_peak_1679	762	.	11.1102	76.2934	74.0452	48
1	18741648	18741811	3wt_3mu_merged_p20_peak_1680	943	.	12.7562	94.3051	91.9765	91
1	18751971	18752037	3wt_3mu_merged_p20_peak_1681	397	.	7.40682	39.7993	37.7912	29
1	18752777	18752844	3wt_3mu_merged_p20_peak_1682	829	.	11.7275	82.9354	80.6557	34
1	18755839	18755915	3wt_3mu_merged_p20_peak_1683	343	.	6.78959	34.3862	32.4298	24
1	187628	187681	3wt_3mu_merged_p20_peak_45	313	.	3.88394	31.3915	29.4693	26
1	18777167	18777239	3wt_3mu_merged_p20_peak_1684	388	.	7.30395	38.8817	36.8819	25
1	18789438	18789541	3wt_3mu_merged_p20_peak_1685	416	.	7.61257	41.6523	39.628	45
1	18803701	18803794	3wt_3mu_merged_p20_peak_1686	1443	.	8.90454	144.38	141.886	50
1	18803934	18804108	3wt_3mu_merged_p20_peak_1687	28734	.	71.5673	2873.4	2868.76	82
1	18808	18914	3wt_3mu_merged_p20_peak_9	494	.	4.06068	49.4307	47.3446	54
1	18811843	18812018	3wt_3mu_merged_p20_peak_1688	18840	.	59.1639	1884.03	1880.05	94
1	18812333	18812403	3wt_3mu_merged_p20_peak_1689	539	.	5.56028	53.9669	51.8498	31
1	18824693	18824824	3wt_3mu_merged_p20_peak_1690	3556	.	29.2404	355.686	352.822	53
1	18827840	18828063	3wt_3mu_merged_p20_peak_1691a	621	.	9.19556	62.1846	60.0147	92
1	18827840	18828063	3wt_3mu_merged_p20_peak_1691b	833	.	11.0992	83.3914	81.1102	166
1	18835550	18836301	3wt_3mu_merged_p20_peak_1692a	1553	.	10.924	155.34	152.817	102
1	18835550	18836301	3wt_3mu_merged_p20_peak_1692b	4969	.	23.694	496.927	493.909	261
1	18835550	18836301	3wt_3mu_merged_p20_peak_1692c	2074	.	13.0904	207.412	204.774	539
1	18835550	18836301	3wt_3mu_merged_p20_peak_1692d	2592	.	15.181	259.243	256.514	631
1	18849242	18849759	3wt_3mu_merged_p20_peak_1693a	803	.	9.98281	80.3309	78.0643	157
1	18849242	18849759	3wt_3mu_merged_p20_peak_1693b	2721	.	22.5484	272.168	269.419	338
1	18854957	18855076	3wt_3mu_merged_p20_peak_1694	1446	.	6.94183	144.64	142.146	51
1	1885564	1885831	3wt_3mu_merged_p20_peak_232	8191	.	49.0159	819.143	815.855	129
1	18858286	18858400	3wt_3mu_merged_p20_peak_1695	414	.	3.22418	41.407	39.387	27
1	18859247	18859663	3wt_3mu_merged_p20_peak_1696a	10072	.	19.1392	1007.24	1003.82	114
1	18859247	18859663	3wt_3mu_merged_p20_peak_1696b	8933	.	17.6251	893.327	889.986	220
1	18860702	18860820	3wt_3mu_merged_p20_peak_1697	3042	.	9.23415	304.215	301.418	71
1	18862994	18863165	3wt_3mu_merged_p20_peak_1698	7025	.	15.0689	702.586	699.387	65
1	18867531	18867735	3wt_3mu_merged_p20_peak_1699	1315	.	7.81802	131.599	129.142	104
1	18871693	18871912	3wt_3mu_merged_p20_peak_1700	2308	.	14.2357	230.885	228.204	126
1	18871994	18872053	3wt_3mu_merged_p20_peak_1701	397	.	4.60088	39.7479	37.7433	31
1	18876841	18877096	3wt_3mu_merged_p20_peak_1702	3231	.	21.6408	323.158	320.336	108
1	18883429	18883680	3wt_3mu_merged_p20_peak_1703	584	.	8.01335	58.4848	56.3368	121
1	18885357	18885577	3wt_3mu_merged_p20_peak_1704a	340	.	6.02217	34.0389	32.0884	36
1	18885357	18885577	3wt_3mu_merged_p20_peak_1704b	436	.	6.98401	43.6814	41.6404	101
1	18894618	18894671	3wt_3mu_merged_p20_peak_1705	335	.	6.68672	33.5063	31.559	30
1	18899817	18900175	3wt_3mu_merged_p20_peak_1706	24469	.	44.509	2446.95	2442.6	116
1	18900522	18900790	3wt_3mu_merged_p20_peak_1707	886	.	5.21519	88.6861	86.3811	120
1	18907024	18907196	3wt_3mu_merged_p20_peak_1708	2343	.	21.5525	234.343	231.656	74
1	18908857	18908984	3wt_3mu_merged_p20_peak_1709a	468	.	7.43902	46.8772	44.8115	25
1	18908857	18908984	3wt_3mu_merged_p20_peak_1709b	337	.	6.13873	33.7522	31.8035	86
1	18911609	18911707	3wt_3mu_merged_p20_peak_1710	716	.	8.62858	71.6344	69.4111	39
1	18915854	18916051	3wt_3mu_merged_p20_peak_1711	1327	.	14.242	132.724	130.264	80
1	18921496	18921745	3wt_3mu_merged_p20_peak_1712	1062	.	8.41944	106.251	103.877	112
1	18923676	18923912	3wt_3mu_merged_p20_peak_1713	6751	.	29.7361	675.184	672.007	150
1	18952646	18952801	3wt_3mu_merged_p20_peak_1714	454	.	8.02406	45.4274	43.3718	37
1	18965572	18965902	3wt_3mu_merged_p20_peak_1715a	1928	.	8.11111	192.834	190.225	107
1	18965572	18965902	3wt_3mu_merged_p20_peak_1715b	3855	.	12.4299	385.595	382.695	249
1	18966181	18966298	3wt_3mu_merged_p20_peak_1716	1253	.	6.402	125.328	122.89	61
1	18966393	18966829	3wt_3mu_merged_p20_peak_1717a	10748	.	25.1584	1074.86	1071.4	96
1	18966393	18966829	3wt_3mu_merged_p20_peak_1717b	4827	.	14.6505	482.762	479.757	377
1	18972188	18972248	3wt_3mu_merged_p20_peak_1718	356	.	6.75975	35.6452	33.6777	33
1	18982713	18982805	3wt_3mu_merged_p20_peak_1719	361	.	6.99533	36.1656	34.1914	56
1	18986297	18986454	3wt_3mu_merged_p20_peak_1720	306	.	6.31913	30.6664	28.753	57
1	18989888	18989988	3wt_3mu_merged_p20_peak_1721	454	.	8.02406	45.4274	43.3718	66
1	19003008	19003116	3wt_3mu_merged_p20_peak_1722	582	.	9.3614	58.2847	56.1375	43
1	19014171	19014320	3wt_3mu_merged_p20_peak_1723	1209	.	14.9425	120.937	118.512	82
1	19016793	19016869	3wt_3mu_merged_p20_peak_1724	410	.	6.92781	41.0528	39.0347	43
1	19018520	19018693	3wt_3mu_merged_p20_peak_1725	541	.	8.20458	54.1698	52.0518	50
1	19020622	19020952	3wt_3mu_merged_p20_peak_1726a	570	.	8.9532	57.0818	54.9441	32
1	19020622	19020952	3wt_3mu_merged_p20_peak_1726b	373	.	6.94676	37.3769	35.3922	206
1	19020622	19020952	3wt_3mu_merged_p20_peak_1726c	374	.	6.9539	37.4075	35.4227	296
1	1902533	1902656	3wt_3mu_merged_p20_peak_233	655	.	10.0815	65.5474	63.3563	48
1	19028006	19028163	3wt_3mu_merged_p20_peak_1727	1316	.	15.9452	131.657	129.199	91
1	19034387	19034575	3wt_3mu_merged_p20_peak_1728	1864	.	20.2659	186.479	183.883	91
1	19065464	19065582	3wt_3mu_merged_p20_peak_1729	1329	.	16.0481	132.909	130.448	58
1	19078535	19078608	3wt_3mu_merged_p20_peak_1730	374	.	5.88029	37.4437	35.4587	28
1	19083430	19083615	3wt_3mu_merged_p20_peak_1731	11720	.	55.0304	1172.1	1168.57	67
1	19094164	19094291	3wt_3mu_merged_p20_peak_1732	5844	.	20.9719	584.496	581.396	47
1	19094434	19094624	3wt_3mu_merged_p20_peak_1733	14291	.	39.8473	1429.14	1425.45	92
1	19094745	19094824	3wt_3mu_merged_p20_peak_1734	880	.	6.37842	88.0462	85.7445	52
1	19095174	19095265	3wt_3mu_merged_p20_peak_1735	230	.	3.26447	23.0831	21.2667	13
1	19110978	19111081	3wt_3mu_merged_p20_peak_1736	1316	.	15.9452	131.657	129.199	59
1	19116362	19116428	3wt_3mu_merged_p20_peak_1737	552	.	9.05278	55.2421	53.1148	31
1	19132828	19133082	3wt_3mu_merged_p20_peak_1738	1304	.	15.8424	130.407	127.953	78
1	19152781	19152901	3wt_3mu_merged_p20_peak_1739	522	.	8.74417	52.2437	50.1369	59
1	191721	192219	3wt_3mu_merged_p20_peak_46a	629	.	5.68156	62.9805	60.8054	45
1	191721	192219	3wt_3mu_merged_p20_peak_46b	578	.	5.44183	57.8883	55.7449	147
1	191721	192219	3wt_3mu_merged_p20_peak_46c	4925	.	20.6227	492.536	489.522	367
1	19182144	19182345	3wt_3mu_merged_p20_peak_1740	582	.	9.3614	58.2847	56.1375	113
1	19188598	19188758	3wt_3mu_merged_p20_peak_1741	713	.	9.75172	71.3038	69.0817	98
1	19193345	19193569	3wt_3mu_merged_p20_peak_1742	468	.	7.65133	46.8784	44.8128	62
1	19200387	19200479	3wt_3mu_merged_p20_peak_1743	512	.	8.64129	51.2542	49.1545	26
1	19215251	19215380	3wt_3mu_merged_p20_peak_1744	1479	.	13.313	147.975	145.472	60
1	19218198	19218526	3wt_3mu_merged_p20_peak_1745	2812	.	18.3186	281.273	278.509	125
1	19218658	19218721	3wt_3mu_merged_p20_peak_1746	430	.	5.66908	43.0043	40.9698	36
1	19225884	19226123	3wt_3mu_merged_p20_peak_1747a	298	.	6.01584	29.8248	27.9212	88
1	19225884	19226123	3wt_3mu_merged_p20_peak_1747b	389	.	7.10054	38.9888	36.9884	200
1	19237366	19237842	3wt_3mu_merged_p20_peak_1748a	267	.	3.55777	26.78	24.9108	19
1	19237366	19237842	3wt_3mu_merged_p20_peak_1748b	13897	.	40.3633	1389.79	1386.12	278
1	19243749	19243895	3wt_3mu_merged_p20_peak_1749	1738	.	17.9594	173.885	171.318	48
1	19253444	19253768	3wt_3mu_merged_p20_peak_1750a	435	.	7.81831	43.5285	41.4884	52
1	19253444	19253768	3wt_3mu_merged_p20_peak_1750b	397	.	7.40682	39.7993	37.7912	258
1	19265840	19266003	3wt_3mu_merged_p20_peak_1751	4191	.	35.2826	419.194	416.257	115
1	19272077	19272179	3wt_3mu_merged_p20_peak_1752	298	.	4.4798	29.8251	27.9215	59
1	19273620	19273809	3wt_3mu_merged_p20_peak_1753	2255	.	13.488	225.521	222.849	78
1	19273982	19274131	3wt_3mu_merged_p20_peak_1754	1746	.	11.5423	174.663	172.093	82
1	19274332	19274399	3wt_3mu_merged_p20_peak_1755	251	.	3.87923	25.1783	23.3303	13
1	19278054	19278218	3wt_3mu_merged_p20_peak_1756	662	.	6.29753	66.2426	64.0488	80
1	19279410	19279512	3wt_3mu_merged_p20_peak_1757	677	.	8.25109	67.777	65.5735	50
1	19279710	19279766	3wt_3mu_merged_p20_peak_1758	292	.	5.22627	29.2221	27.3225	25
1	19286356	19286438	3wt_3mu_merged_p20_peak_1759	1077	.	9.64897	107.725	105.345	31
1	19286516	19286754	3wt_3mu_merged_p20_peak_1760	1757	.	13.2578	175.743	173.172	69
1	19286840	19286943	3wt_3mu_merged_p20_peak_1761	2351	.	16.0691	235.187	232.498	39
1	19287036	19287200	3wt_3mu_merged_p20_peak_1762	382	.	5.30842	38.2544	36.2614	32
1	19296632	19296719	3wt_3mu_merged_p20_peak_1763	350	.	6.42118	35.0565	33.096	40
1	19298	19383	3wt_3mu_merged_p20_peak_10	453	.	3.94817	45.3973	43.3446	34
1	19299788	19299967	3wt_3mu_merged_p20_peak_1764	3176	.	24.8307	317.627	314.812	86
1	19308628	19308768	3wt_3mu_merged_p20_peak_1765	473	.	8.2298	47.3483	45.2776	63
1	19315903	19316040	3wt_3mu_merged_p20_peak_1766	1096	.	14.0935	109.603	107.217	48
1	19329012	19329282	3wt_3mu_merged_p20_peak_1767a	397	.	7.40682	39.7993	37.7912	52
1	19329012	19329282	3wt_3mu_merged_p20_peak_1767b	885	.	12.2418	88.5748	86.2702	178
1	19332740	19332877	3wt_3mu_merged_p20_peak_1768	1452	.	17.0007	145.246	142.75	76
1	19335001	19335124	3wt_3mu_merged_p20_peak_1769	385	.	5.66067	38.5838	36.5889	29
1	19338450	19338955	3wt_3mu_merged_p20_peak_1770a	324	.	5.09146	32.4614	30.5284	15
1	19338450	19338955	3wt_3mu_merged_p20_peak_1770b	1982	.	15.2247	198.269	195.649	205
1	19345640	19345707	3wt_3mu_merged_p20_peak_1771	301	.	5.55166	30.1178	28.208	29
1	19349747	19349981	3wt_3mu_merged_p20_peak_1772	2658	.	22.6007	265.893	263.154	145
1	19361159	19361234	3wt_3mu_merged_p20_peak_1773	512	.	8.64129	51.2542	49.1545	42
1	19364587	19364658	3wt_3mu_merged_p20_peak_1774	560	.	9.10752	56.0465	53.9155	35
1	19369194	19369386	3wt_3mu_merged_p20_peak_1775	585	.	8.91304	58.5962	56.4476	102
1	19371707	19371901	3wt_3mu_merged_p20_peak_1776	580	.	9.2997	58.0212	55.8772	80
1	19377631	19377761	3wt_3mu_merged_p20_peak_1777	708	.	10.5959	70.868	68.6476	58
1	1941006	1941346	3wt_3mu_merged_p20_peak_234a	2787	.	26.9526	278.766	276.006	77
1	1941006	1941346	3wt_3mu_merged_p20_peak_234b	851	.	11.9332	85.18	82.8902	223
1	19425181	19425241	3wt_3mu_merged_p20_peak_1778	250	.	5.65799	25.0873	23.24	25
1	19426443	19426559	3wt_3mu_merged_p20_peak_1779	741	.	10.0909	74.1611	71.9237	69
1	19431112	19431173	3wt_3mu_merged_p20_peak_1780	394	.	4.75434	39.4202	37.4174	25
1	19432914	19433038	3wt_3mu_merged_p20_peak_1781	4802	.	23.135	480.265	477.263	53
1	19433117	19433329	3wt_3mu_merged_p20_peak_1782	3678	.	19.1796	367.839	364.96	98
1	19462005	19462198	3wt_3mu_merged_p20_peak_1783	1108	.	14.1964	110.803	108.412	138
1	19502300	19502490	3wt_3mu_merged_p20_peak_1784	2563	.	21.709	256.339	253.614	84
1	19513137	19513287	3wt_3mu_merged_p20_peak_1785	4322	.	31.4294	432.226	429.275	79
1	19515413	19515673	3wt_3mu_merged_p20_peak_1786a	322	.	5.90238	32.2157	30.2843	62
1	19515413	19515673	3wt_3mu_merged_p20_peak_1786b	559	.	8.12689	55.9131	53.7827	196
1	1951938	1952006	3wt_3mu_merged_p20_peak_235	343	.	6.78959	34.3862	32.4298	41
1	19537926	19538118	3wt_3mu_merged_p20_peak_1787	8403	.	48.5518	840.314	837.011	116
1	19571008	19571301	3wt_3mu_merged_p20_peak_1788	10664	.	47.9731	1066.41	1062.95	183
1	19593124	19593194	3wt_3mu_merged_p20_peak_1789	807	.	11.5217	80.7059	78.4365	31
1	19599197	19599329	3wt_3mu_merged_p20_peak_1790	6928	.	35.0342	692.82	689.629	53
1	19602159	19602486	3wt_3mu_merged_p20_peak_1791a	985	.	8.28205	98.5678	96.2229	112
1	19602159	19602486	3wt_3mu_merged_p20_peak_1791b	330	.	4.45193	33.0798	31.139	280
1	19607367	19607423	3wt_3mu_merged_p20_peak_1792	214	.	4.71877	21.4569	19.6646	37
1	19609460	19609605	3wt_3mu_merged_p20_peak_1793	717	.	10.6453	71.714	69.4904	43
1	19624956	19625017	3wt_3mu_merged_p20_peak_1794	741	.	10.9045	74.111	71.8737	26
1	19643467	19643583	3wt_3mu_merged_p20_peak_1795	1752	.	18.6018	175.293	172.722	62
1	19648167	19648274	3wt_3mu_merged_p20_peak_1796	2504	.	15.9863	250.484	247.769	56
1	19649192	19649300	3wt_3mu_merged_p20_peak_1797	575	.	6.80268	57.5962	55.4541	72
1	19649424	19649550	3wt_3mu_merged_p20_peak_1798	3386	.	21.1248	338.658	335.815	62
1	19665000	19665084	3wt_3mu_merged_p20_peak_1799	211	.	5.14363	21.1616	19.3718	66
1	19671917	19672213	3wt_3mu_merged_p20_peak_1800	613	.	9.67002	61.3699	59.2034	73
1	19673552	19673611	3wt_3mu_merged_p20_peak_1801	267	.	5.86373	26.713	24.8442	35
1	19708403	19708465	3wt_3mu_merged_p20_peak_1802	204	.	5.04075	20.4014	18.6238	7
1	1973686	1974073	3wt_3mu_merged_p20_peak_236a	863	.	12.0361	86.308	84.0132	62
1	1973686	1974073	3wt_3mu_merged_p20_peak_236b	730	.	10.8016	73.0259	70.7942	254
1	19742878	19742970	3wt_3mu_merged_p20_peak_1803	370	.	7.09821	37.0648	35.0819	33
1	19745257	19745343	3wt_3mu_merged_p20_peak_1804	343	.	6.78959	34.3862	32.4298	31
1	19764000	19764052	3wt_3mu_merged_p20_peak_1805	673	.	5.06651	67.3368	65.1368	24
1	19764784	19765283	3wt_3mu_merged_p20_peak_1806a	14925	.	36.1287	1492.54	1488.8	101
1	19764784	19765283	3wt_3mu_merged_p20_peak_1806b	5839	.	18.487	583.915	580.816	380
1	19765343	19765440	3wt_3mu_merged_p20_peak_1807	949	.	6.00469	94.9215	92.5911	54
1	19775992	19776087	3wt_3mu_merged_p20_peak_1808	613	.	9.67002	61.3699	59.2034	44
1	19776256	19776374	3wt_3mu_merged_p20_peak_1809	542	.	8.94991	54.2377	52.1171	57
1	19787928	19788011	3wt_3mu_merged_p20_peak_1810	352	.	6.89246	35.2727	33.3073	38
1	19788235	19788331	3wt_3mu_merged_p20_peak_1811	1254	.	15.4309	125.435	122.996	49
1	19798107	19798196	3wt_3mu_merged_p20_peak_1812	1036	.	13.5792	103.653	101.288	44
1	19808350	19808547	3wt_3mu_merged_p20_peak_1813	9582	.	53.1388	958.252	954.866	104
1	19815326	19815395	3wt_3mu_merged_p20_peak_1814	250	.	5.65799	25.0873	23.24	15
1	19849125	19849240	3wt_3mu_merged_p20_peak_1815	2154	.	22.4262	215.405	212.751	54
1	19887412	19887604	3wt_3mu_merged_p20_peak_1816	1316	.	15.9452	131.657	129.199	132
1	19894884	19895117	3wt_3mu_merged_p20_peak_1817	23027	.	41.7195	2302.75	2298.5	123
1	19896180	19896337	3wt_3mu_merged_p20_peak_1818	2301	.	8.89939	230.106	227.426	110
1	19896652	19896724	3wt_3mu_merged_p20_peak_1819	419	.	3.60738	41.9309	39.905	38
1	19896864	19896989	3wt_3mu_merged_p20_peak_1820	1270	.	6.29354	127.027	124.583	42
1	19897083	19897219	3wt_3mu_merged_p20_peak_1821	2308	.	8.84779	230.875	228.194	65
1	19903028	19903407	3wt_3mu_merged_p20_peak_1822a	1768	.	14.9104	176.844	174.27	48
1	19903028	19903407	3wt_3mu_merged_p20_peak_1822b	1928	.	15.8111	192.801	190.192	261
1	19910408	19910603	3wt_3mu_merged_p20_peak_1823a	249	.	5.09282	24.9177	23.0767	37
1	19910408	19910603	3wt_3mu_merged_p20_peak_1823b	393	.	6.5726	39.3421	37.3397	135
1	19911142	19911226	3wt_3mu_merged_p20_peak_1824	376	.	6.4174	37.6897	35.7032	30
1	19911371	19911490	3wt_3mu_merged_p20_peak_1825	591	.	8.34287	59.1458	56.9948	68
1	19919130	19919259	3wt_3mu_merged_p20_peak_1826	379	.	7.20108	37.9702	35.9788	76
1	19926596	19926806	3wt_3mu_merged_p20_peak_1827	680	.	9.56613	68.0241	65.8197	56
1	19932175	19932627	3wt_3mu_merged_p20_peak_1828a	620	.	7.56155	62.037	59.8678	64
1	19932175	19932627	3wt_3mu_merged_p20_peak_1828b	547	.	7.01497	54.7491	52.6261	157
1	19932175	19932627	3wt_3mu_merged_p20_peak_1828c	2849	.	20.1649	284.932	282.163	335
1	1994109	1994263	3wt_3mu_merged_p20_peak_237	676	.	10.2873	67.6627	65.4597	44
1	19943424	19944175	3wt_3mu_merged_p20_peak_1829a	266	.	3.64853	26.6365	24.773	21
1	19943424	19944175	3wt_3mu_merged_p20_peak_1829b	1608	.	9.65479	160.808	158.272	166
1	19943424	19944175	3wt_3mu_merged_p20_peak_1829c	2804	.	13.7706	280.441	277.679	360
1	19943424	19944175	3wt_3mu_merged_p20_peak_1829d	3268	.	15.1947	326.895	324.068	568
1	19958115	19958223	3wt_3mu_merged_p20_peak_1830	697	.	10.493	69.7953	67.5807	59
1	19959339	19959617	3wt_3mu_merged_p20_peak_1831a	943	.	12.7562	94.3051	91.9765	136
1	19959339	19959617	3wt_3mu_merged_p20_peak_1831b	708	.	10.5959	70.868	68.6476	236
1	19971328	19971391	3wt_3mu_merged_p20_peak_1832	334	.	3.77006	33.4109	31.4681	36
1	19975284	19975803	3wt_3mu_merged_p20_peak_1833a	1427	.	8.08542	142.791	140.302	88
1	19975284	19975803	3wt_3mu_merged_p20_peak_1833b	11377	.	31.9845	1137.74	1134.23	352
1	19976143	19976243	3wt_3mu_merged_p20_peak_1834	365	.	3.8903	36.5601	34.5836	63
1	19988906	19988986	3wt_3mu_merged_p20_peak_1835	509	.	8.43559	50.9208	48.825	39
1	20001920	20002017	3wt_3mu_merged_p20_peak_1836	492	.	8.43555	49.2908	47.2054	47
1	20030797	20031025	3wt_3mu_merged_p20_peak_1837	2276	.	20.7836	227.614	224.939	95
1	20031856	20031973	3wt_3mu_merged_p20_peak_1838	722	.	9.46798	72.2554	70.0282	52
1	20057	20116	3wt_3mu_merged_p20_peak_11	304	.	3.33798	30.4096	28.4979	26
1	20062345	20062401	3wt_3mu_merged_p20_peak_1839	708	.	10.5959	70.868	68.6476	29
1	20068093	20068213	3wt_3mu_merged_p20_peak_1840	2951	.	17.1434	295.168	292.384	71
1	20069002	20069120	3wt_3mu_merged_p20_peak_1841	497	.	5.87662	49.7241	47.6366	26
1	20069468	20069730	3wt_3mu_merged_p20_peak_1842	1525	.	11.5213	152.517	150.002	115
1	20084392	20084542	3wt_3mu_merged_p20_peak_1843	708	.	10.5959	70.868	68.6476	38
1	200936	200996	3wt_3mu_merged_p20_peak_47	372	.	5.99477	37.2424	35.2586	44
1	20095159	20095217	3wt_3mu_merged_p20_peak_1844	250	.	5.65799	25.0873	23.24	26
1	201132	201194	3wt_3mu_merged_p20_peak_48	246	.	4.70035	24.6944	22.8551	19
1	20131783	20131922	3wt_3mu_merged_p20_peak_1845	655	.	10.0815	65.5474	63.3563	47
1	2013363	2013540	3wt_3mu_merged_p20_peak_238	388	.	7.30395	38.8817	36.8819	120
1	20138410	20138502	3wt_3mu_merged_p20_peak_1846	343	.	6.78959	34.3862	32.4298	30
1	20144174	20144331	3wt_3mu_merged_p20_peak_1847	1274	.	13.3929	127.46	125.015	112
1	20145554	20145650	3wt_3mu_merged_p20_peak_1848	346	.	6.24786	34.6932	32.7349	34
1	20146733	20146797	3wt_3mu_merged_p20_peak_1849	436	.	7.08153	43.6845	41.6436	36
1	20154564	20154798	3wt_3mu_merged_p20_peak_1850a	519	.	7.85116	51.9259	49.823	44
1	20154564	20154798	3wt_3mu_merged_p20_peak_1850b	1051	.	12.25	105.14	102.77	148
1	20170864	20170935	3wt_3mu_merged_p20_peak_1851	239	.	4.19519	23.9795	22.1508	29
1	20174449	20174690	3wt_3mu_merged_p20_peak_1852a	1034	.	8.16521	103.412	101.049	71
1	20174449	20174690	3wt_3mu_merged_p20_peak_1852b	1052	.	8.13934	105.297	102.927	182
1	20178600	20178813	3wt_3mu_merged_p20_peak_1853	790	.	7.19357	79.0664	76.8055	81
1	20179127	20179220	3wt_3mu_merged_p20_peak_1854	419	.	5.10487	41.911	39.8852	55
1	20179598	20179685	3wt_3mu_merged_p20_peak_1855	681	.	7.36543	68.1988	65.9937	37
1	20188497	20188569	3wt_3mu_merged_p20_peak_1856	204	.	5.04075	20.4014	18.6238	10
1	20193883	20194059	3wt_3mu_merged_p20_peak_1857a	676	.	10.2873	67.6627	65.4597	49
1	20193883	20194059	3wt_3mu_merged_p20_peak_1857b	807	.	11.5217	80.7059	78.4365	100
1	2019465	2019617	3wt_3mu_merged_p20_peak_239	492	.	8.43555	49.2908	47.2054	111
1	20201391	20201496	3wt_3mu_merged_p20_peak_1858	311	.	6.3197	31.1046	29.1843	62
1	20215281	20215345	3wt_3mu_merged_p20_peak_1859	532	.	8.84704	53.2382	51.1244	30
1	20215448	20215516	3wt_3mu_merged_p20_peak_1860	275	.	5.96661	27.5371	25.658	38
1	20224665	20224878	3wt_3mu_merged_p20_peak_1861	1272	.	15.4962	127.29	124.845	117
1	20241112	20241192	3wt_3mu_merged_p20_peak_1862	361	.	6.99533	36.1656	34.1914	37
1	20241312	20241507	3wt_3mu_merged_p20_peak_1863	676	.	10.2873	67.6627	65.4597	112
1	20250029	20250236	3wt_3mu_merged_p20_peak_1864	2366	.	23.9693	236.608	233.916	103
1	20257287	20257392	3wt_3mu_merged_p20_peak_1865	463	.	8.12693	46.3852	44.322	69
1	20264063	20264199	3wt_3mu_merged_p20_peak_1866	588	.	8.73118	58.8672	56.7175	58
1	20266413	20266757	3wt_3mu_merged_p20_peak_1867a	450	.	5.26936	45.0462	42.9954	38
1	20266413	20266757	3wt_3mu_merged_p20_peak_1867b	374	.	4.75421	37.4052	35.4204	270
1	20269253	20269387	3wt_3mu_merged_p20_peak_1868	260	.	3.34646	26.0794	24.2199	22
1	20271053	20271221	3wt_3mu_merged_p20_peak_1869	2653	.	11.7463	265.344	262.605	108
1	20272031	20272105	3wt_3mu_merged_p20_peak_1870	593	.	5.22202	59.3834	57.2294	28
1	20272830	20273105	3wt_3mu_merged_p20_peak_1871a	554	.	5.01946	55.4029	53.2748	58
1	20272830	20273105	3wt_3mu_merged_p20_peak_1871b	2495	.	12.0481	249.559	246.845	167
1	20273161	20273297	3wt_3mu_merged_p20_peak_1872	4437	.	17.6031	443.778	440.814	71
1	20279033	20279180	3wt_3mu_merged_p20_peak_1873	1108	.	14.1964	110.803	108.412	47
1	20279295	20279482	3wt_3mu_merged_p20_peak_1874	1304	.	15.8424	130.407	127.953	88
1	20291585	20291828	3wt_3mu_merged_p20_peak_1875	966	.	12.9619	96.6218	94.2839	104
1	20300310	20300405	3wt_3mu_merged_p20_peak_1876	529	.	8.53344	52.9874	50.8771	46
1	20300703	20300788	3wt_3mu_merged_p20_peak_1877	522	.	8.48393	52.2214	50.1171	33
1	20304748	20304919	3wt_3mu_merged_p20_peak_1878a	295	.	4.78443	29.5326	27.6309	20
1	20304748	20304919	3wt_3mu_merged_p20_peak_1878b	734	.	7.98283	73.4867	71.2533	116
1	20308098	20308388	3wt_3mu_merged_p20_peak_1879a	1686	.	15.7483	168.687	166.132	84
1	20308098	20308388	3wt_3mu_merged_p20_peak_1879b	774	.	9.55392	77.4293	75.1756	239
1	20308456	20308683	3wt_3mu_merged_p20_peak_1880	397	.	6.3913	39.7635	37.7587	25
1	20318970	20319143	3wt_3mu_merged_p20_peak_1881	1029	.	10.8819	102.911	100.549	73
1	20319839	20320121	3wt_3mu_merged_p20_peak_1882a	287	.	5.13508	28.7396	26.8476	75
1	20319839	20320121	3wt_3mu_merged_p20_peak_1882b	416	.	6.32828	41.6194	39.5982	140
1	20319839	20320121	3wt_3mu_merged_p20_peak_1882c	354	.	5.82189	35.4904	33.5237	231
1	20330521	20330727	3wt_3mu_merged_p20_peak_1883	973	.	12.2043	97.3435	95.0034	81
1	20332682	20332826	3wt_3mu_merged_p20_peak_1884	609	.	9.4403	60.9653	58.8025	88
1	2033543	2033603	3wt_3mu_merged_p20_peak_240	463	.	8.12693	46.3852	44.322	33
1	20341297	20341367	3wt_3mu_merged_p20_peak_1885	283	.	6.06948	28.3687	26.4793	39
1	20341503	20341669	3wt_3mu_merged_p20_peak_1886	1084	.	13.9907	108.407	106.024	46
1	20370597	20370673	3wt_3mu_merged_p20_peak_1887	326	.	6.58384	32.6329	30.6949	26
1	20381760	20381822	3wt_3mu_merged_p20_peak_1888	250	.	5.65799	25.0873	23.24	6
1	20397584	20397670	3wt_3mu_merged_p20_peak_1889	388	.	7.30395	38.8817	36.8819	47
1	20403984	20404041	3wt_3mu_merged_p20_peak_1890	388	.	7.30395	38.8817	36.8819	26
1	20406893	20406945	3wt_3mu_merged_p20_peak_1891	283	.	6.06948	28.3687	26.4793	25
1	20416261	20416426	3wt_3mu_merged_p20_peak_1892	2538	.	25.2038	253.873	251.153	81
1	20437612	20437696	3wt_3mu_merged_p20_peak_1893	370	.	7.09821	37.0648	35.0819	56
1	20461988	20462051	3wt_3mu_merged_p20_peak_1894	397	.	7.40682	39.7993	37.7912	27
1	20466193	20466491	3wt_3mu_merged_p20_peak_1895a	318	.	5.37438	31.8853	29.9561	50
1	20466193	20466491	3wt_3mu_merged_p20_peak_1895b	1347	.	12.7995	134.762	132.296	210
1	20490874	20490930	3wt_3mu_merged_p20_peak_1896	242	.	5.55512	24.286	22.4498	28
1	20499919	20500216	3wt_3mu_merged_p20_peak_1897a	612	.	9.64766	61.2742	59.1101	34
1	20499919	20500216	3wt_3mu_merged_p20_peak_1897b	726	.	10.7103	72.6303	70.4017	212
1	20501787	20501857	3wt_3mu_merged_p20_peak_1898	543	.	8.70791	54.3117	52.1908	37
1	20514385	20514460	3wt_3mu_merged_p20_peak_1899	425	.	7.71544	42.5876	40.5553	34
1	20531649	20531709	3wt_3mu_merged_p20_peak_1900	292	.	6.17235	29.2075	27.308	25
1	20536196	20536510	3wt_3mu_merged_p20_peak_1901a	1205	.	15.0194	120.51	118.086	177
1	20536196	20536510	3wt_3mu_merged_p20_peak_1901b	361	.	6.99533	36.1656	34.1914	295
1	20543306	20543421	3wt_3mu_merged_p20_peak_1902	2168	.	22.5291	216.805	214.148	67
1	20543688	20543815	3wt_3mu_merged_p20_peak_1903	562	.	9.15566	56.2515	54.1174	53
1	20550726	20550873	3wt_3mu_merged_p20_peak_1904	3629	.	25.9874	362.958	360.085	71
1	20552829	20552912	3wt_3mu_merged_p20_peak_1905	2098	.	18.7934	209.811	207.169	43
1	20559743	20559856	3wt_3mu_merged_p20_peak_1906	920	.	12.5505	92.0023	89.6832	42
1	20578409	20578464	3wt_3mu_merged_p20_peak_1907	407	.	7.5097	40.7229	38.7066	25
1	20593800	20593941	3wt_3mu_merged_p20_peak_1908	379	.	7.20108	37.9702	35.9788	79
1	20611186	20611256	3wt_3mu_merged_p20_peak_1909	741	.	10.9045	74.111	71.8737	31
1	20623736	20623801	3wt_3mu_merged_p20_peak_1910	444	.	7.92119	44.4752	42.4273	36
1	20625776	20625834	3wt_3mu_merged_p20_peak_1911	473	.	8.2298	47.3483	45.2776	28
1	20626060	20626221	3wt_3mu_merged_p20_peak_1912	1598	.	18.2084	159.832	157.298	74
1	20635103	20635491	3wt_3mu_merged_p20_peak_1913a	4667	.	22.6973	466.739	463.751	45
1	20635103	20635491	3wt_3mu_merged_p20_peak_1913b	5883	.	26.5208	588.363	585.26	150
1	20635103	20635491	3wt_3mu_merged_p20_peak_1913c	1451	.	10.1414	145.126	142.63	321
1	20636004	20636085	3wt_3mu_merged_p20_peak_1914	1220	.	9.05663	122.074	119.645	37
1	20640361	20640424	3wt_3mu_merged_p20_peak_1915	498	.	6.90579	49.8539	47.7658	28
1	20642912	20643077	3wt_3mu_merged_p20_peak_1916	572	.	9.25853	57.2657	55.1251	107
1	20643138	20643252	3wt_3mu_merged_p20_peak_1917	708	.	10.5959	70.868	68.6476	52
1	20649477	20649575	3wt_3mu_merged_p20_peak_1918	548	.	7.36565	54.8963	52.7727	52
1	20653245	20653795	3wt_3mu_merged_p20_peak_1919a	288	.	4.95281	28.8072	26.9148	30
1	20653245	20653795	3wt_3mu_merged_p20_peak_1919b	246	.	4.57774	24.6863	22.8471	152
1	20653245	20653795	3wt_3mu_merged_p20_peak_1919c	2571	.	19.1662	257.124	254.398	384
1	20653245	20653795	3wt_3mu_merged_p20_peak_1919d	2208	.	17.2552	220.819	218.155	487
1	20668549	20668654	3wt_3mu_merged_p20_peak_1920	439	.	7.79378	43.9394	41.8971	52
1	20668906	20669080	3wt_3mu_merged_p20_peak_1921	709	.	10.3344	70.9726	68.7519	111
1	20682579	20682648	3wt_3mu_merged_p20_peak_1922	335	.	6.68672	33.5063	31.559	29
1	20700420	20700491	3wt_3mu_merged_p20_peak_1923	352	.	6.89246	35.2727	33.3073	33
1	20719156	20719314	3wt_3mu_merged_p20_peak_1924	448	.	7.75936	44.8169	42.7673	39
1	20719704	20719857	3wt_3mu_merged_p20_peak_1925	647	.	8.57285	64.7071	62.5212	44
1	20723326	20723400	3wt_3mu_merged_p20_peak_1926	568	.	7.28726	56.8892	54.7523	38
1	20724275	20724445	3wt_3mu_merged_p20_peak_1927	1499	.	13.2777	149.915	147.407	60
1	20733970	20734046	3wt_3mu_merged_p20_peak_1928	380	.	6.78585	38.0665	36.0746	27
1	20738361	20738447	3wt_3mu_merged_p20_peak_1929	1524	.	16.1299	152.454	149.938	41
1	2075710	2075811	3wt_3mu_merged_p20_peak_241	1479	.	15.1016	147.916	145.413	46
1	20796398	20796458	3wt_3mu_merged_p20_peak_1930	300	.	6.27523	30.0534	28.1441	24
1	2080026	2080441	3wt_3mu_merged_p20_peak_242a	550	.	7.84854	55.0113	52.8872	84
1	2080026	2080441	3wt_3mu_merged_p20_peak_242b	2346	.	20.1017	234.66	231.972	157
1	2080026	2080441	3wt_3mu_merged_p20_peak_242c	525	.	7.56601	52.5126	50.4046	299
1	20808230	20808287	3wt_3mu_merged_p20_peak_1931	317	.	6.48097	31.7662	29.8377	27
1	20808343	20808445	3wt_3mu_merged_p20_peak_1932	425	.	7.71544	42.5876	40.5553	40
1	20813693	20813957	3wt_3mu_merged_p20_peak_1933a	444	.	7.92119	44.4752	42.4273	33
1	20813693	20813957	3wt_3mu_merged_p20_peak_1933b	1770	.	19.5458	177.048	174.473	161
1	20823797	20823892	3wt_3mu_merged_p20_peak_1934	684	.	7.19338	68.4187	66.2127	29
1	20824359	20824482	3wt_3mu_merged_p20_peak_1935	416	.	5.41959	41.6647	39.6403	33
1	20825637	20825725	3wt_3mu_merged_p20_peak_1936	570	.	6.35333	57.0943	54.9565	31
1	20825807	20826159	3wt_3mu_merged_p20_peak_1937a	985	.	8.75243	98.5843	96.2394	67
1	20825807	20826159	3wt_3mu_merged_p20_peak_1937b	1394	.	10.8675	139.426	136.946	214
1	20825807	20826159	3wt_3mu_merged_p20_peak_1937c	2634	.	16.4829	263.403	260.667	288
1	2083023	2083104	3wt_3mu_merged_p20_peak_243	309	.	6.3781	30.9063	28.9874	40
1	20838055	20838123	3wt_3mu_merged_p20_peak_1938	416	.	7.61257	41.6523	39.628	30
1	20848763	20848876	3wt_3mu_merged_p20_peak_1939	1060	.	13.7849	106.024	103.65	57
1	20854806	20854909	3wt_3mu_merged_p20_peak_1940	741	.	10.9045	74.111	71.8737	67
1	20861920	20862046	3wt_3mu_merged_p20_peak_1941	1651	.	17.7256	165.185	162.638	52
1	20862449	20862516	3wt_3mu_merged_p20_peak_1942	229	.	5.12613	22.9019	21.0869	8
1	20864917	20865003	3wt_3mu_merged_p20_peak_1943	804	.	10.1192	80.4349	78.1679	45
1	20866445	20866569	3wt_3mu_merged_p20_peak_1944	1676	.	15.2966	167.63	165.078	70
1	20871111	20871210	3wt_3mu_merged_p20_peak_1945	389	.	6.97885	38.9312	36.9312	31
1	20891373	20891537	3wt_3mu_merged_p20_peak_1946a	562	.	9.15566	56.2515	54.1174	36
1	20891373	20891537	3wt_3mu_merged_p20_peak_1946b	473	.	8.2298	47.3483	45.2776	130
1	20902333	20902529	3wt_3mu_merged_p20_peak_1947	2511	.	19.1792	251.113	248.397	78
1	20904517	20904714	3wt_3mu_merged_p20_peak_1948a	1995	.	15.7546	199.55	196.927	55
1	20904517	20904714	3wt_3mu_merged_p20_peak_1948b	734	.	8.21713	73.4485	71.2153	158
1	20910247	20910385	3wt_3mu_merged_p20_peak_1949	5767	.	16.6305	576.766	573.674	78
1	20910871	20911433	3wt_3mu_merged_p20_peak_1950a	2081	.	8.6997	208.197	205.557	63
1	20910871	20911433	3wt_3mu_merged_p20_peak_1950b	1835	.	8.05958	183.524	180.936	257
1	20910871	20911433	3wt_3mu_merged_p20_peak_1950c	16217	.	34.2609	1621.8	1617.98	431
1	20917445	20917519	3wt_3mu_merged_p20_peak_1951	874	.	12.139	87.4396	85.1399	35
1	20928698	20928951	3wt_3mu_merged_p20_peak_1952	44778	.	69.5106	4477.86	4471.75	134
1	20944277	20944430	3wt_3mu_merged_p20_peak_1953	687	.	10.3901	68.7269	66.518	48
1	20952536	20952684	3wt_3mu_merged_p20_peak_1954	13087	.	63.2554	1308.78	1305.16	66
1	2096179	2096235	3wt_3mu_merged_p20_peak_244	361	.	6.99533	36.1656	34.1914	41
1	2096311	2096423	3wt_3mu_merged_p20_peak_245	670	.	8.49645	67.0293	64.8305	63
1	20969658	20970375	3wt_3mu_merged_p20_peak_1955a	494	.	4.33053	49.4472	47.3611	101
1	20969658	20970375	3wt_3mu_merged_p20_peak_1955b	1109	.	6.60413	110.946	108.555	200
1	20969658	20970375	3wt_3mu_merged_p20_peak_1955c	983	.	6.16317	98.3452	96.001	280
1	20969658	20970375	3wt_3mu_merged_p20_peak_1955d	15559	.	36.7523	1555.92	1552.14	622
1	20973917	20974002	3wt_3mu_merged_p20_peak_1956	1326	.	7.58044	132.637	130.177	46
1	2101144	2101352	3wt_3mu_merged_p20_peak_246	6302	.	30.5212	630.252	627.112	121
1	2101495	2101648	3wt_3mu_merged_p20_peak_247	1772	.	13.3621	177.253	174.677	35
1	2102723	2102957	3wt_3mu_merged_p20_peak_248a	649	.	7.04791	64.9546	62.7676	41
1	2102723	2102957	3wt_3mu_merged_p20_peak_248b	1149	.	9.89758	114.997	112.592	175
1	2109362	2109648	3wt_3mu_merged_p20_peak_249	9598	.	24.2931	959.872	956.485	151
1	21123599	21123656	3wt_3mu_merged_p20_peak_1957	388	.	7.30395	38.8817	36.8819	26
1	2112515	2112837	3wt_3mu_merged_p20_peak_250	11199	.	27.1902	1119.95	1116.45	124
1	21141753	21141840	3wt_3mu_merged_p20_peak_1958	454	.	8.02406	45.4274	43.3718	26
1	21146572	21146636	3wt_3mu_merged_p20_peak_1959	506	.	8.38323	50.6927	48.598	36
1	21146706	21146786	3wt_3mu_merged_p20_peak_1960	331	.	6.60899	33.1874	31.2459	49
1	21163115	21163525	3wt_3mu_merged_p20_peak_1961a	740	.	7.90568	74.0025	71.7672	89
1	21163115	21163525	3wt_3mu_merged_p20_peak_1961b	2994	.	19.4752	299.492	296.702	338
1	21165801	21166066	3wt_3mu_merged_p20_peak_1962	1165	.	10.7097	116.516	114.106	142
1	21178001	21178106	3wt_3mu_merged_p20_peak_1963	350	.	6.63196	35.0959	33.1351	40
1	21179835	21179914	3wt_3mu_merged_p20_peak_1964	2349	.	23.6026	234.936	232.247	35
1	21185722	21185821	3wt_3mu_merged_p20_peak_1965	562	.	9.15566	56.2515	54.1174	58
1	2119028	2119137	3wt_3mu_merged_p20_peak_251	473	.	8.2298	47.3483	45.2776	66
1	21204048	21204111	3wt_3mu_merged_p20_peak_1966	301	.	4.05822	30.1891	28.2789	26
1	21204496	21204795	3wt_3mu_merged_p20_peak_1967	12619	.	39.1435	1261.92	1258.33	198
1	21205845	21205923	3wt_3mu_merged_p20_peak_1968	2563	.	12.4985	256.37	253.645	36
1	21209386	21209503	3wt_3mu_merged_p20_peak_1969	563	.	5.32774	56.3883	54.2536	52
1	21212575	21212704	3wt_3mu_merged_p20_peak_1970	630	.	9.01734	63.0564	60.881	76
1	21230615	21230959	3wt_3mu_merged_p20_peak_1971a	2151	.	21.1828	215.116	212.463	66
1	21230615	21230959	3wt_3mu_merged_p20_peak_1971b	919	.	11.936	91.9751	89.6572	222
1	2126712	2126913	3wt_3mu_merged_p20_peak_252a	326	.	6.58384	32.6329	30.6949	18
1	2126712	2126913	3wt_3mu_merged_p20_peak_252b	407	.	7.5097	40.7229	38.7066	168
1	21268076	21268186	3wt_3mu_merged_p20_peak_1972	1048	.	13.682	104.837	102.468	75
1	21270765	21270827	3wt_3mu_merged_p20_peak_1973	966	.	12.9619	96.6218	94.2839	25
1	21284981	21285054	3wt_3mu_merged_p20_peak_1974	443	.	7.88589	44.3274	42.2831	28
1	21286672	21286811	3wt_3mu_merged_p20_peak_1975	246	.	4.81891	24.6354	22.7966	37
1	21287330	21287396	3wt_3mu_merged_p20_peak_1976	323	.	5.0211	32.3845	30.452	36
1	21291480	21291662	3wt_3mu_merged_p20_peak_1977	2520	.	18.0404	252.072	249.355	75
1	21291765	21291968	3wt_3mu_merged_p20_peak_1978	1553	.	13.6661	155.325	152.802	89
1	21297126	21297183	3wt_3mu_merged_p20_peak_1979	422	.	6.88074	42.2317	40.2043	31
1	21297612	21297845	3wt_3mu_merged_p20_peak_1980a	804	.	10.2389	80.4358	78.1687	33
1	21297612	21297845	3wt_3mu_merged_p20_peak_1980b	3526	.	27.8748	352.602	349.742	134
1	21309284	21309554	3wt_3mu_merged_p20_peak_1981	11345	.	49.0885	1134.5	1131	87
1	21321064	21321154	3wt_3mu_merged_p20_peak_1982	872	.	10.5892	87.2541	84.9562	43
1	21321450	21321663	3wt_3mu_merged_p20_peak_1983a	1794	.	17.4048	179.419	176.839	33
1	21321450	21321663	3wt_3mu_merged_p20_peak_1983b	443	.	7.12698	44.385	42.3404	135
1	21329332	21329502	3wt_3mu_merged_p20_peak_1984	951	.	9.83105	95.1952	92.8639	102
1	21333418	21333600	3wt_3mu_merged_p20_peak_1985	590	.	6.49206	59.018	56.8676	56
1	21336271	21336342	3wt_3mu_merged_p20_peak_1986	352	.	5.62674	35.2197	33.2582	42
1	21337293	21337346	3wt_3mu_merged_p20_peak_1987	373	.	5.71713	37.3261	35.3418	25
1	21337539	21337635	3wt_3mu_merged_p20_peak_1988	276	.	4.86333	27.6097	25.7301	35
1	2134083	2134187	3wt_3mu_merged_p20_peak_253	361	.	6.99533	36.1656	34.1914	36
1	21352193	21352392	3wt_3mu_merged_p20_peak_1989	11490	.	52.7759	1149.03	1145.51	92
1	21355929	21355999	3wt_3mu_merged_p20_peak_1990	286	.	4.49172	28.6415	26.7503	34
1	21360598	21360698	3wt_3mu_merged_p20_peak_1991a	275	.	5.96661	27.5371	25.658	22
1	21360598	21360698	3wt_3mu_merged_p20_peak_1991b	211	.	5.14363	21.1616	19.3718	66
1	21367788	21367885	3wt_3mu_merged_p20_peak_1992	407	.	7.5097	40.7229	38.7066	33
1	21381519	21381600	3wt_3mu_merged_p20_peak_1993	300	.	6.27523	30.0534	28.1441	38
1	21382481	21382594	3wt_3mu_merged_p20_peak_1994	552	.	9.05278	55.2421	53.1148	47
1	21394936	21395235	3wt_3mu_merged_p20_peak_1995	4081	.	33.023	408.148	405.222	142
1	21400796	21401030	3wt_3mu_merged_p20_peak_1996	1683	.	16.8637	168.336	165.782	92
1	21408514	21408600	3wt_3mu_merged_p20_peak_1997	943	.	5.29033	94.3576	92.0289	48
1	21408705	21408822	3wt_3mu_merged_p20_peak_1998	1845	.	7.66948	184.568	181.977	67
1	21409146	21409223	3wt_3mu_merged_p20_peak_1999	886	.	5.12542	88.6711	86.3661	33
1	21409284	21409376	3wt_3mu_merged_p20_peak_2000	491	.	3.8372	49.1804	47.098	42
1	21409613	21410044	3wt_3mu_merged_p20_peak_2001	13577	.	28.5183	1357.8	1354.15	270
1	214138	214402	3wt_3mu_merged_p20_peak_49	14603	.	32.5086	1460.37	1456.66	110
1	2141596	2141763	3wt_3mu_merged_p20_peak_254	897	.	12.3447	89.7138	87.4042	80
1	21418022	21418128	3wt_3mu_merged_p20_peak_2002	1946	.	20.8831	194.649	192.036	59
1	2141854	2141912	3wt_3mu_merged_p20_peak_255	234	.	5.45224	23.4927	21.6677	46
1	21432230	21432396	3wt_3mu_merged_p20_peak_2003	675	.	9.47198	67.5712	65.3702	65
1	2143755	2143843	3wt_3mu_merged_p20_peak_256	337	.	6.6346	33.7463	31.7976	46
1	21447070	21447129	3wt_3mu_merged_p20_peak_2004	267	.	5.86373	26.713	24.8442	26
1	214529	214597	3wt_3mu_merged_p20_peak_50	473	.	3.97023	47.3425	45.2745	39
1	21463555	21463617	3wt_3mu_merged_p20_peak_2005	326	.	6.58384	32.6329	30.6949	32
1	21463787	21463894	3wt_3mu_merged_p20_peak_2006	492	.	8.43555	49.2908	47.2054	35
1	214663	215057	3wt_3mu_merged_p20_peak_51	3559	.	12.2777	355.918	353.054	237
1	21470310	21470532	3wt_3mu_merged_p20_peak_2007	2056	.	21.7061	205.661	203.026	61
1	21478483	21478553	3wt_3mu_merged_p20_peak_2008	258	.	5.76086	25.8963	24.0382	48
1	21483185	21483355	3wt_3mu_merged_p20_peak_2009a	541	.	7.5876	54.1374	52.0195	54
1	21483185	21483355	3wt_3mu_merged_p20_peak_2009b	377	.	6.17858	37.791	35.804	130
1	21483446	21483938	3wt_3mu_merged_p20_peak_2010a	289	.	5.38821	28.9268	27.0336	23
1	21483446	21483938	3wt_3mu_merged_p20_peak_2010b	1921	.	17.7536	192.154	189.547	110
1	21483446	21483938	3wt_3mu_merged_p20_peak_2010c	673	.	8.95822	67.3022	65.1023	281
1	21483446	21483938	3wt_3mu_merged_p20_peak_2010d	1183	.	12.7691	118.343	115.927	462
1	21491124	21491185	3wt_3mu_merged_p20_peak_2011	425	.	7.71544	42.5876	40.5553	42
1	21491551	21491649	3wt_3mu_merged_p20_peak_2012	473	.	8.2298	47.3483	45.2776	49
1	2149248	2149565	3wt_3mu_merged_p20_peak_257a	1789	.	18.1265	178.941	176.362	93
1	2149248	2149565	3wt_3mu_merged_p20_peak_257b	543	.	8.36205	54.3809	52.2597	259
1	21500402	21500475	3wt_3mu_merged_p20_peak_2013	275	.	5.96661	27.5371	25.658	41
1	21500676	21500832	3wt_3mu_merged_p20_peak_2014	397	.	7.40682	39.7993	37.7912	45
1	21513745	21513821	3wt_3mu_merged_p20_peak_2015	258	.	5.76086	25.8963	24.0382	62
1	21516746	21516814	3wt_3mu_merged_p20_peak_2016	730	.	10.8016	73.0259	70.7942	27
1	21521948	21522002	3wt_3mu_merged_p20_peak_2017	258	.	5.76086	25.8963	24.0382	29
1	2152433	2152600	3wt_3mu_merged_p20_peak_258	506	.	7.9121	50.667	48.5725	112
1	21538445	21538541	3wt_3mu_merged_p20_peak_2018	708	.	8.58456	70.8254	68.6068	26
1	21538625	21538770	3wt_3mu_merged_p20_peak_2019	7502	.	43.0566	750.275	747.039	52
1	21539610	21539720	3wt_3mu_merged_p20_peak_2020	4246	.	27.9186	424.682	421.739	46
1	2155206	2155426	3wt_3mu_merged_p20_peak_259a	502	.	8.53842	50.2699	48.1773	42
1	2155206	2155426	3wt_3mu_merged_p20_peak_259b	512	.	8.64129	51.2542	49.1545	147
1	21562950	21563081	3wt_3mu_merged_p20_peak_2021	1964	.	20.8771	196.431	193.815	102
1	21563280	21563381	3wt_3mu_merged_p20_peak_2022	1241	.	15.328	124.2	121.764	50
1	21573246	21573337	3wt_3mu_merged_p20_peak_2023	1611	.	18.3113	161.142	158.605	37
1	2158540	2158790	3wt_3mu_merged_p20_peak_260	572	.	9.25853	57.2657	55.1251	46
1	21592556	21592625	3wt_3mu_merged_p20_peak_2024	267	.	5.86373	26.713	24.8442	22
1	21598941	21599107	3wt_3mu_merged_p20_peak_2025	593	.	9.46427	59.3084	57.1547	76
1	21615346	21615414	3wt_3mu_merged_p20_peak_2026	302	.	4.49688	30.2608	28.3501	17
1	21615497	21616074	3wt_3mu_merged_p20_peak_2027a	2748	.	16.7821	274.835	272.082	112
1	21615497	21616074	3wt_3mu_merged_p20_peak_2027b	2015	.	13.5761	201.503	198.876	479
1	2162044	2162152	3wt_3mu_merged_p20_peak_261	282	.	6.04893	28.2859	26.4015	45
1	21621333	21621393	3wt_3mu_merged_p20_peak_2028	292	.	6.17235	29.2075	27.308	25
1	21626381	21626524	3wt_3mu_merged_p20_peak_2029	1156	.	14.6079	115.632	113.225	47
1	21628171	21628224	3wt_3mu_merged_p20_peak_2030	593	.	9.46427	59.3084	57.1547	26
1	21631259	21631405	3wt_3mu_merged_p20_peak_2031	1096	.	14.0935	109.603	107.217	49
1	21634572	21634662	3wt_3mu_merged_p20_peak_2032	562	.	9.15566	56.2515	54.1174	32
1	21637224	21637487	3wt_3mu_merged_p20_peak_2033a	1664	.	18.7228	166.406	163.856	54
1	21637224	21637487	3wt_3mu_merged_p20_peak_2033b	388	.	7.30395	38.8817	36.8819	233
1	2163791	2163988	3wt_3mu_merged_p20_peak_262	1072	.	13.8878	107.214	104.836	137
1	21651266	21651529	3wt_3mu_merged_p20_peak_2034a	1033	.	11.5376	103.389	101.026	59
1	21651266	21651529	3wt_3mu_merged_p20_peak_2034b	5926	.	39.2509	592.672	589.565	192
1	21651946	21652016	3wt_3mu_merged_p20_peak_2035	339	.	5.61155	33.9534	32.0034	57
1	21656651	21656710	3wt_3mu_merged_p20_peak_2036	326	.	6.58384	32.6329	30.6949	33
1	21656776	21656942	3wt_3mu_merged_p20_peak_2037	572	.	9.25853	57.2657	55.1251	88
1	21660397	21660472	3wt_3mu_merged_p20_peak_2038	382	.	6.83019	38.2668	36.2737	46
1	21662184	21662428	3wt_3mu_merged_p20_peak_2039a	481	.	7.59269	48.1175	46.043	92
1	21662184	21662428	3wt_3mu_merged_p20_peak_2039b	348	.	6.2908	34.8942	32.9347	205
1	21662815	21662939	3wt_3mu_merged_p20_peak_2040	470	.	7.36676	47.0195	44.9531	65
1	21665873	21666094	3wt_3mu_merged_p20_peak_2041	829	.	9.58548	82.9371	80.6575	139
1	21669357	21669479	3wt_3mu_merged_p20_peak_2042	525	.	7.29156	52.5147	50.4066	62
1	21669611	21669717	3wt_3mu_merged_p20_peak_2043	525	.	7.29579	52.5382	50.43	46
1	21671755	21671923	3wt_3mu_merged_p20_peak_2044	2837	.	23.6126	283.738	280.971	58
1	2167478	2167607	3wt_3mu_merged_p20_peak_263	512	.	8.64129	51.2542	49.1545	62
1	21697784	21698224	3wt_3mu_merged_p20_peak_2045a	1768	.	14.9104	176.844	174.27	172
1	21697784	21698224	3wt_3mu_merged_p20_peak_2045b	1903	.	15.6754	190.343	187.74	313
1	21713751	21714060	3wt_3mu_merged_p20_peak_2046a	2154	.	21.6376	215.466	212.812	46
1	21713751	21714060	3wt_3mu_merged_p20_peak_2046b	1924	.	20.0113	192.426	189.818	252
1	21724615	21724697	3wt_3mu_merged_p20_peak_2047	300	.	5.10668	30.0304	28.1254	70
1	21728526	21728718	3wt_3mu_merged_p20_peak_2048a	1162	.	7.43025	116.269	113.86	38
1	21728526	21728718	3wt_3mu_merged_p20_peak_2048b	7546	.	24.893	754.636	751.397	112
1	21730025	21730345	3wt_3mu_merged_p20_peak_2049	5943	.	21.1673	594.305	591.197	123
1	21736260	21736368	3wt_3mu_merged_p20_peak_2050	1237	.	13.5151	123.754	121.321	53
1	21741961	21742020	3wt_3mu_merged_p20_peak_2051	258	.	5.76086	25.8963	24.0382	36
1	21742099	21742229	3wt_3mu_merged_p20_peak_2052	897	.	12.3447	89.7138	87.4042	47
1	21748326	21748412	3wt_3mu_merged_p20_peak_2053	321	.	5.55979	32.1093	30.1786	28
1	21748492	21748606	3wt_3mu_merged_p20_peak_2054	2442	.	19.7776	244.299	241.595	59
1	21750780	21750946	3wt_3mu_merged_p20_peak_2055	3277	.	21.2514	327.734	324.906	67
1	21753592	21753812	3wt_3mu_merged_p20_peak_2056	774	.	8.7717	77.4968	75.2429	80
1	21757480	21757547	3wt_3mu_merged_p20_peak_2057	309	.	5.89582	30.9511	29.0318	24
1	21763089	21763205	3wt_3mu_merged_p20_peak_2058	383	.	6.84345	38.3264	36.333	65
1	21776327	21776576	3wt_3mu_merged_p20_peak_2059	444	.	7.92119	44.4752	42.4273	86
1	21782569	21782789	3wt_3mu_merged_p20_peak_2060	2190	.	17.5022	219.09	216.43	117
1	21782851	21782954	3wt_3mu_merged_p20_peak_2061	351	.	5.60733	35.1105	33.1496	60
1	21783196	21783306	3wt_3mu_merged_p20_peak_2062	665	.	8.14086	66.5892	64.3939	47
1	21791766	21792006	3wt_3mu_merged_p20_peak_2063a	726	.	9.66057	72.6447	70.416	123
1	21791766	21792006	3wt_3mu_merged_p20_peak_2063b	1275	.	14.109	127.555	125.11	198
1	21794300	21794479	3wt_3mu_merged_p20_peak_2064	1144	.	12.5657	114.435	112.031	55
1	21800379	21800673	3wt_3mu_merged_p20_peak_2065	2216	.	21.0418	221.695	219.03	150
1	21806676	21807095	3wt_3mu_merged_p20_peak_2066	5435	.	34.6567	543.513	540.45	123
1	2181145	2181212	3wt_3mu_merged_p20_peak_264	388	.	7.30395	38.8817	36.8819	32
1	21815483	21815624	3wt_3mu_merged_p20_peak_2067	719	.	10.6987	71.9449	69.7188	39
1	21827209	21827287	3wt_3mu_merged_p20_peak_2068	1546	.	17.7969	154.616	152.096	34
1	21828993	21829307	3wt_3mu_merged_p20_peak_2069a	903	.	11.7421	90.389	88.0773	51
1	21828993	21829307	3wt_3mu_merged_p20_peak_2069b	372	.	6.71676	37.2943	35.3101	163
1	21833792	21833845	3wt_3mu_merged_p20_peak_2070	292	.	6.17235	29.2075	27.308	27
1	2183983	2184151	3wt_3mu_merged_p20_peak_265	795	.	11.4189	79.5969	77.3328	94
1	21841544	21841621	3wt_3mu_merged_p20_peak_2071	279	.	5.86298	27.9367	26.0547	46
1	21841799	21842104	3wt_3mu_merged_p20_peak_2072	3327	.	29.256	332.769	329.934	124
1	21860523	21860650	3wt_3mu_merged_p20_peak_2073	317	.	6.48097	31.7662	29.8377	113
1	21867520	21867629	3wt_3mu_merged_p20_peak_2074a	227	.	5.34937	22.7074	20.8939	43
1	21867520	21867629	3wt_3mu_merged_p20_peak_2074b	300	.	6.27523	30.0534	28.1441	81
1	21873646	21873733	3wt_3mu_merged_p20_peak_2075	977	.	13.0648	97.7853	95.4428	40
1	21881791	21881856	3wt_3mu_merged_p20_peak_2076	1629	.	18.336	162.955	160.413	38
1	21929563	21929634	3wt_3mu_merged_p20_peak_2077	512	.	8.64129	51.2542	49.1545	33
1	21930216	21930278	3wt_3mu_merged_p20_peak_2078	361	.	6.99533	36.1656	34.1914	37
1	21934105	21934204	3wt_3mu_merged_p20_peak_2079	281	.	4.05077	28.1508	26.2673	28
1	21937030	21937294	3wt_3mu_merged_p20_peak_2080	6491	.	28.7378	649.122	645.967	180
1	21937918	21938119	3wt_3mu_merged_p20_peak_2081	1697	.	11.6604	169.709	167.151	53
1	21985141	21985232	3wt_3mu_merged_p20_peak_2082	248	.	5.23655	24.8447	23.0042	56
1	21986411	21986480	3wt_3mu_merged_p20_peak_2083	240	.	5.50817	24.0995	22.2699	30
1	22000987	22001093	3wt_3mu_merged_p20_peak_2084	1156	.	14.6079	115.632	113.225	72
1	22002580	22002680	3wt_3mu_merged_p20_peak_2085	839	.	11.4947	83.9049	81.6219	58
1	22005428	22005498	3wt_3mu_merged_p20_peak_2086	613	.	8.55441	61.3138	59.1495	36
1	22005668	22005833	3wt_3mu_merged_p20_peak_2087a	396	.	6.64362	39.6895	37.6852	28
1	22005668	22005833	3wt_3mu_merged_p20_peak_2087b	399	.	6.70723	39.9983	37.9891	128
1	2201560	2201728	3wt_3mu_merged_p20_peak_266a	280	.	4.26796	28.0272	26.1446	39
1	2201560	2201728	3wt_3mu_merged_p20_peak_266b	293	.	4.36838	29.3503	27.4499	119
1	22047814	22047920	3wt_3mu_merged_p20_peak_2088	804	.	11.1597	80.4171	78.1501	36
1	2205603	2205844	3wt_3mu_merged_p20_peak_267	3421	.	17.3028	342.15	339.303	122
1	2206418	2206513	3wt_3mu_merged_p20_peak_268	666	.	6.39161	66.6274	64.4302	65
1	22069663	22069807	3wt_3mu_merged_p20_peak_2089	1084	.	13.9907	108.407	106.024	73
1	22079282	22079380	3wt_3mu_merged_p20_peak_2090	542	.	8.94991	54.2377	52.1171	56
1	22089706	22089785	3wt_3mu_merged_p20_peak_2091	300	.	6.27523	30.0534	28.1441	24
1	2209450	2209703	3wt_3mu_merged_p20_peak_269a	1428	.	10.7361	142.83	140.34	118
1	2209450	2209703	3wt_3mu_merged_p20_peak_269b	1644	.	11.7517	164.449	161.904	186
1	22096283	22096368	3wt_3mu_merged_p20_peak_2092	908	.	12.4476	90.8562	88.5419	39
1	22102567	22102652	3wt_3mu_merged_p20_peak_2093	275	.	5.96661	27.5371	25.658	30
1	22105563	22105682	3wt_3mu_merged_p20_peak_2094a	234	.	5.45224	23.4927	21.6677	23
1	22105563	22105682	3wt_3mu_merged_p20_peak_2094b	219	.	5.2465	21.9303	20.1286	83
1	22178819	22179158	3wt_3mu_merged_p20_peak_2095a	326	.	6.58384	32.6329	30.6949	43
1	22178819	22179158	3wt_3mu_merged_p20_peak_2095b	644	.	9.97864	64.4963	62.3112	210
1	22186795	22186876	3wt_3mu_merged_p20_peak_2096	425	.	7.71544	42.5876	40.5553	33
1	22205364	22205613	3wt_3mu_merged_p20_peak_2097a	572	.	9.25853	57.2657	55.1251	58
1	22205364	22205613	3wt_3mu_merged_p20_peak_2097b	250	.	5.65799	25.0873	23.24	160
1	22205784	22205946	3wt_3mu_merged_p20_peak_2098	897	.	12.3447	89.7138	87.4042	67
1	2221637	2222046	3wt_3mu_merged_p20_peak_270	17683	.	28.0048	1768.36	1764.45	181
1	2222166	2222426	3wt_3mu_merged_p20_peak_271a	626	.	3.79786	62.6475	60.4738	49
1	2222166	2222426	3wt_3mu_merged_p20_peak_271b	663	.	3.90105	66.3021	64.108	178
1	22227960	22228136	3wt_3mu_merged_p20_peak_2099	1203	.	12.4952	120.329	117.906	57
1	22229334	22229557	3wt_3mu_merged_p20_peak_2100a	245	.	4.87452	24.5713	22.733	20
1	22229334	22229557	3wt_3mu_merged_p20_peak_2100b	1538	.	14.7813	153.836	151.317	170
1	22229997	22230075	3wt_3mu_merged_p20_peak_2101	529	.	7.46594	52.9788	50.8685	45
1	22245657	22245757	3wt_3mu_merged_p20_peak_2102	326	.	6.58384	32.6329	30.6949	52
1	22251173	22251395	3wt_3mu_merged_p20_peak_2103	1354	.	16.2539	135.423	132.954	94
1	22289773	22289921	3wt_3mu_merged_p20_peak_2104	1229	.	15.2251	122.967	120.535	90
1	2230701	2230758	3wt_3mu_merged_p20_peak_272	593	.	9.46427	59.3084	57.1547	25
1	22324481	22324562	3wt_3mu_merged_p20_peak_2105	384	.	7.07547	38.4028	36.409	40
1	22330933	22331178	3wt_3mu_merged_p20_peak_2106	2905	.	21.8712	290.528	287.751	126
1	2237002	2237078	3wt_3mu_merged_p20_peak_273	275	.	5.96661	27.5371	25.658	55
1	22370627	22370778	3wt_3mu_merged_p20_peak_2107	1389	.	13.8738	138.912	136.434	69
1	22373847	22373947	3wt_3mu_merged_p20_peak_2108	383	.	6.56373	38.3985	36.4048	69
1	2239331	2239596	3wt_3mu_merged_p20_peak_274a	829	.	11.7275	82.9354	80.6557	66
1	2239331	2239596	3wt_3mu_merged_p20_peak_274b	655	.	10.0815	65.5474	63.3563	156
1	22393968	22394068	3wt_3mu_merged_p20_peak_2109	1770	.	19.5458	177.048	174.473	52
1	22402089	22402253	3wt_3mu_merged_p20_peak_2110	638	.	9.69043	63.8431	61.6626	118
1	22411407	22411545	3wt_3mu_merged_p20_peak_2111	1764	.	10.7242	176.491	173.918	68
1	22411730	22412263	3wt_3mu_merged_p20_peak_2112a	428	.	4.76234	42.8487	40.815	31
1	22411730	22412263	3wt_3mu_merged_p20_peak_2112b	547	.	5.43116	54.7299	52.6071	234
1	22411730	22412263	3wt_3mu_merged_p20_peak_2112c	9472	.	33.7522	947.257	943.879	385
1	22421937	22422128	3wt_3mu_merged_p20_peak_2113a	1279	.	14.9714	127.986	125.539	59
1	22421937	22422128	3wt_3mu_merged_p20_peak_2113b	4187	.	33.8242	418.774	415.837	141
1	22427025	22427131	3wt_3mu_merged_p20_peak_2114	613	.	9.67002	61.3699	59.2034	37
1	22440228	22440297	3wt_3mu_merged_p20_peak_2115	603	.	9.56715	60.3368	58.1767	31
1	22440619	22440681	3wt_3mu_merged_p20_peak_2116	234	.	5.45224	23.4927	21.6677	28
1	22447080	22447214	3wt_3mu_merged_p20_peak_2117	730	.	10.8016	73.0259	70.7942	69
1	22455352	22455511	3wt_3mu_merged_p20_peak_2118	1120	.	14.2993	112.005	109.61	91
1	22463465	22463645	3wt_3mu_merged_p20_peak_2119	492	.	8.43555	49.2908	47.2054	116
1	22474505	22474608	3wt_3mu_merged_p20_peak_2120	426	.	7.61575	42.6748	40.6421	57
1	22477185	22477322	3wt_3mu_merged_p20_peak_2121	851	.	11.6199	85.1361	82.8477	61
1	22484859	22484954	3wt_3mu_merged_p20_peak_2122	1029	.	12.3715	102.99	100.628	37
1	22506165	22506529	3wt_3mu_merged_p20_peak_2123a	4257	.	22.9695	425.759	422.814	114
1	22506165	22506529	3wt_3mu_merged_p20_peak_2123b	3483	.	19.9666	348.378	345.523	218
1	2250714	2251045	3wt_3mu_merged_p20_peak_275	9577	.	39.1244	957.737	954.351	180
1	22512011	22512126	3wt_3mu_merged_p20_peak_2124	2659	.	20.2622	265.934	263.194	49
1	22514439	22514530	3wt_3mu_merged_p20_peak_2125	1836	.	16.1329	183.662	181.073	49
1	22528099	22528288	3wt_3mu_merged_p20_peak_2126a	512	.	8.64129	51.2542	49.1545	66
1	22528099	22528288	3wt_3mu_merged_p20_peak_2126b	309	.	6.3781	30.9063	28.9874	160
1	22534718	22534780	3wt_3mu_merged_p20_peak_2127	335	.	6.68672	33.5063	31.559	27
1	22550448	22550508	3wt_3mu_merged_p20_peak_2128	897	.	12.3447	89.7138	87.4042	33
1	22558441	22558513	3wt_3mu_merged_p20_peak_2129	242	.	5.55512	24.286	22.4498	14
1	22570234	22570506	3wt_3mu_merged_p20_peak_2130a	1255	.	14.7794	125.551	123.111	85
1	22570234	22570506	3wt_3mu_merged_p20_peak_2130b	367	.	6.81217	36.7952	34.8173	185
1	22593669	22593995	3wt_3mu_merged_p20_peak_2131a	561	.	8.38878	56.1305	53.9992	66
1	22593669	22593995	3wt_3mu_merged_p20_peak_2131b	882	.	11.1624	88.2531	85.9508	270
1	22594254	22594345	3wt_3mu_merged_p20_peak_2132	446	.	7.27356	44.6077	42.5592	64
1	2260125	2260687	3wt_3mu_merged_p20_peak_276a	16611	.	31.3426	1661.11	1657.27	150
1	2260125	2260687	3wt_3mu_merged_p20_peak_276b	20786	.	36.8842	2078.69	2074.58	228
1	2260125	2260687	3wt_3mu_merged_p20_peak_276c	2007	.	7.91047	200.778	198.153	502
1	22617604	22617685	3wt_3mu_merged_p20_peak_2133	309	.	5.48518	30.9463	29.0271	52
1	22617940	22618201	3wt_3mu_merged_p20_peak_2134	2102	.	18.1205	210.255	207.612	182
1	22636587	22636673	3wt_3mu_merged_p20_peak_2135	635	.	7.98937	63.5882	61.4087	40
1	22638769	22638886	3wt_3mu_merged_p20_peak_2136	1577	.	14.79	157.709	155.181	69
1	22640044	22640124	3wt_3mu_merged_p20_peak_2137	1172	.	11.6352	117.3	114.887	37
1	22644473	22644612	3wt_3mu_merged_p20_peak_2138a	322	.	6.37607	32.2155	30.2841	36
1	22644473	22644612	3wt_3mu_merged_p20_peak_2138b	446	.	7.73148	44.6957	42.6467	105
1	22651269	22651455	3wt_3mu_merged_p20_peak_2139	5844	.	23.4555	584.406	581.307	62
1	22651669	22652121	3wt_3mu_merged_p20_peak_2140a	2151	.	12.0843	215.105	212.452	68
1	22651669	22652121	3wt_3mu_merged_p20_peak_2140b	6408	.	25.3225	640.885	637.736	354
1	22661514	22661675	3wt_3mu_merged_p20_peak_2141	713	.	9.18687	71.3651	69.1429	46
1	22663984	22664089	3wt_3mu_merged_p20_peak_2142	2058	.	16.0938	205.802	203.167	48
1	22665417	22665491	3wt_3mu_merged_p20_peak_2143	972	.	9.86344	97.2142	94.8745	39
1	226658	226741	3wt_3mu_merged_p20_peak_52	958	.	8.83454	95.8561	93.5217	45
1	22668080	22668279	3wt_3mu_merged_p20_peak_2144	1777	.	15.4196	177.735	175.159	92
1	22671158	22671246	3wt_3mu_merged_p20_peak_2145	330	.	6.56697	33.0139	31.0735	62
1	22677638	22677850	3wt_3mu_merged_p20_peak_2146	1156	.	14.6079	115.632	113.225	64
1	22677999	22678056	3wt_3mu_merged_p20_peak_2147	483	.	8.33268	48.3169	46.2388	33
1	22678524	22678594	3wt_3mu_merged_p20_peak_2148	463	.	8.12693	46.3852	44.322	46
1	227178	227315	3wt_3mu_merged_p20_peak_53	14733	.	60.7733	1473.39	1469.66	51
1	22752410	22752471	3wt_3mu_merged_p20_peak_2149	373	.	5.86178	37.3404	35.356	31
1	22756651	22756897	3wt_3mu_merged_p20_peak_2150	719	.	8.78228	71.9693	69.7431	119
1	22757111	22757276	3wt_3mu_merged_p20_peak_2151	4784	.	31.4216	478.444	475.444	88
1	22802852	22803190	3wt_3mu_merged_p20_peak_2152a	1628	.	10.8983	162.832	160.291	46
1	22802852	22803190	3wt_3mu_merged_p20_peak_2152b	16793	.	55.3026	1679.35	1675.49	283
1	22808546	22808958	3wt_3mu_merged_p20_peak_2153a	16293	.	27.9123	1629.35	1625.52	210
1	22808546	22808958	3wt_3mu_merged_p20_peak_2153b	22001	.	34.6521	2200.17	2195.99	331
1	22809032	22809084	3wt_3mu_merged_p20_peak_2154	448	.	3.39433	44.8567	42.8068	29
1	22811880	22811977	3wt_3mu_merged_p20_peak_2155	1361	.	5.77883	136.163	133.692	52
1	22814801	22814997	3wt_3mu_merged_p20_peak_2156	2898	.	27.3719	289.814	287.039	89
1	22820236	22820299	3wt_3mu_merged_p20_peak_2157	258	.	5.76086	25.8963	24.0382	39
1	22820465	22820707	3wt_3mu_merged_p20_peak_2158a	425	.	7.71544	42.5876	40.5553	42
1	22820465	22820707	3wt_3mu_merged_p20_peak_2158b	258	.	5.76086	25.8963	24.0382	190
1	22828481	22828645	3wt_3mu_merged_p20_peak_2159	11078	.	34.3803	1107.89	1104.4	85
1	22829056	22829459	3wt_3mu_merged_p20_peak_2160a	1049	.	7.30016	104.926	102.556	111
1	22829056	22829459	3wt_3mu_merged_p20_peak_2160b	658	.	5.61216	65.8289	63.6366	367
1	22829683	22829808	3wt_3mu_merged_p20_peak_2161	472	.	4.10664	47.2042	45.1368	85
1	22834567	22834972	3wt_3mu_merged_p20_peak_2162a	400	.	3.07551	40.0869	38.0773	23
1	22834567	22834972	3wt_3mu_merged_p20_peak_2162b	12703	.	22.2194	1270.35	1266.76	247
1	22834567	22834972	3wt_3mu_merged_p20_peak_2162c	367	.	3.02065	36.7522	34.7746	389
1	22835866	22836198	3wt_3mu_merged_p20_peak_2163	8758	.	17.5955	875.869	872.54	105
1	22838502	22838627	3wt_3mu_merged_p20_peak_2164	2641	.	8.27088	264.186	261.449	71
1	22845136	22845202	3wt_3mu_merged_p20_peak_2165	1128	.	14.1515	112.843	110.446	35
1	22849388	22849525	3wt_3mu_merged_p20_peak_2166	1362	.	11.383	136.21	133.739	61
1	22851345	22851524	3wt_3mu_merged_p20_peak_2167	4080	.	25.0267	408.002	405.077	88
1	22851631	22851752	3wt_3mu_merged_p20_peak_2168	1721	.	13.8734	172.169	169.606	50
1	22858238	22858510	3wt_3mu_merged_p20_peak_2169	2691	.	7.98616	269.103	266.358	121
1	22861235	22861622	3wt_3mu_merged_p20_peak_2170a	3753	.	9.67885	375.319	372.431	62
1	22861235	22861622	3wt_3mu_merged_p20_peak_2170b	31865	.	41.3995	3186.52	3181.64	203
1	22896248	22896409	3wt_3mu_merged_p20_peak_2171	1404	.	16.6654	140.483	138	46
1	22920133	22920206	3wt_3mu_merged_p20_peak_2172	242	.	5.55512	24.286	22.4498	36
1	22930989	22931227	3wt_3mu_merged_p20_peak_2173a	795	.	11.4189	79.5969	77.3328	67
1	22930989	22931227	3wt_3mu_merged_p20_peak_2173b	2906	.	27.7756	290.647	287.87	178
1	22931289	22931361	3wt_3mu_merged_p20_peak_2174	352	.	6.89246	35.2727	33.3073	29
1	22938463	22938656	3wt_3mu_merged_p20_peak_2175a	428	.	7.54931	42.8926	40.8587	63
1	22938463	22938656	3wt_3mu_merged_p20_peak_2175b	551	.	8.78097	55.1921	53.0671	151
1	22945464	22945856	3wt_3mu_merged_p20_peak_2176a	715	.	7.34616	71.5044	69.2816	162
1	22945464	22945856	3wt_3mu_merged_p20_peak_2176b	649	.	6.98397	64.9631	62.7761	265
1	22945958	22946179	3wt_3mu_merged_p20_peak_2177	2192	.	14.8267	219.203	216.542	160
1	22948612	22948759	3wt_3mu_merged_p20_peak_2178	248	.	4.23293	24.8085	22.9684	33
1	22967686	22967800	3wt_3mu_merged_p20_peak_2179	1168	.	14.7108	116.847	114.436	62
1	22968064	22968228	3wt_3mu_merged_p20_peak_2180	1329	.	16.0481	132.909	130.448	80
1	22976980	22977038	3wt_3mu_merged_p20_peak_2181	422	.	7.64002	42.2721	40.2445	28
1	22977100	22977216	3wt_3mu_merged_p20_peak_2182	911	.	12.1941	91.113	88.7978	58
1	22977527	22977670	3wt_3mu_merged_p20_peak_2183	1060	.	12.8628	106.099	103.725	58
1	22981789	22981857	3wt_3mu_merged_p20_peak_2184	489	.	7.36684	48.9904	46.909	32
1	22988009	22988069	3wt_3mu_merged_p20_peak_2185	258	.	5.76086	25.8963	24.0382	26
1	22993624	22993830	3wt_3mu_merged_p20_peak_2186a	453	.	7.77348	45.3906	43.3379	62
1	22993624	22993830	3wt_3mu_merged_p20_peak_2186b	703	.	10.1949	70.3457	68.1289	167
1	23002443	23002715	3wt_3mu_merged_p20_peak_2187a	2115	.	14.932	211.584	208.938	97
1	23002443	23002715	3wt_3mu_merged_p20_peak_2187b	2190	.	15.2995	219.04	216.38	182
1	23005725	23005889	3wt_3mu_merged_p20_peak_2188	958	.	8.98107	95.8158	93.4815	110
1	23005952	23006051	3wt_3mu_merged_p20_peak_2189	572	.	6.61575	57.2195	55.0812	36
1	23017692	23017789	3wt_3mu_merged_p20_peak_2190	397	.	7.40682	39.7993	37.7912	33
1	2301827	2301993	3wt_3mu_merged_p20_peak_277	6380	.	37.3876	638.024	634.878	100
1	2302201	2302346	3wt_3mu_merged_p20_peak_278	1089	.	11.14	108.993	106.609	55
1	23026463	23026608	3wt_3mu_merged_p20_peak_2191	562	.	9.15566	56.2515	54.1174	65
1	23027090	23027494	3wt_3mu_merged_p20_peak_2192a	834	.	11.5361	83.4272	81.1459	137
1	23027090	23027494	3wt_3mu_merged_p20_peak_2192b	437	.	7.62188	43.711	41.6699	377
1	23027608	23027796	3wt_3mu_merged_p20_peak_2193	1098	.	13.6488	109.812	107.425	63
1	23040056	23040310	3wt_3mu_merged_p20_peak_2194	2097	.	11.4587	209.704	207.061	130
1	23043545	23043969	3wt_3mu_merged_p20_peak_2195a	1462	.	9.87161	146.238	143.739	81
1	23043545	23043969	3wt_3mu_merged_p20_peak_2195b	3136	.	16.1617	313.607	310.798	236
1	23043545	23043969	3wt_3mu_merged_p20_peak_2195c	597	.	5.85516	59.7802	57.6245	373
1	23044369	23044442	3wt_3mu_merged_p20_peak_2196	728	.	6.59059	72.846	70.6166	32
1	23051063	23051217	3wt_3mu_merged_p20_peak_2197	463	.	8.12693	46.3852	44.322	60
1	23057193	23057296	3wt_3mu_merged_p20_peak_2198	397	.	7.40682	39.7993	37.7912	51
1	2305746	2305892	3wt_3mu_merged_p20_peak_279	451	.	5.80035	45.1036	43.0525	45
1	23090457	23090820	3wt_3mu_merged_p20_peak_2199a	380	.	6.48544	38.0207	36.0291	33
1	23090457	23090820	3wt_3mu_merged_p20_peak_2199b	825	.	9.03742	82.5398	80.2628	229
1	23095221	23095315	3wt_3mu_merged_p20_peak_2200	997	.	7.46443	99.7554	97.4059	54
1	23095519	23095681	3wt_3mu_merged_p20_peak_2201	2012	.	11.5981	201.221	198.595	103
1	23099493	23099751	3wt_3mu_merged_p20_peak_2202	1209	.	8.47174	120.904	118.48	164
1	23100050	23100297	3wt_3mu_merged_p20_peak_2203a	2592	.	13.788	259.266	256.537	62
1	23100050	23100297	3wt_3mu_merged_p20_peak_2203b	1412	.	9.54305	141.24	138.755	163
1	2310303	2310455	3wt_3mu_merged_p20_peak_280	404	.	6.80112	40.4502	38.4385	39
1	23108755	23109021	3wt_3mu_merged_p20_peak_2204a	437	.	5.2009	43.7612	41.7199	30
1	23108755	23109021	3wt_3mu_merged_p20_peak_2204b	578	.	6.07114	57.8935	55.7501	223
1	23109313	23109703	3wt_3mu_merged_p20_peak_2205a	2871	.	16.0778	287.19	284.418	79
1	23109313	23109703	3wt_3mu_merged_p20_peak_2205b	1422	.	10.1657	142.27	139.782	261
1	23109313	23109703	3wt_3mu_merged_p20_peak_2205c	290	.	4.16853	29.0652	27.171	379
1	23109774	23110110	3wt_3mu_merged_p20_peak_2206a	757	.	6.97455	75.7598	73.515	60
1	23109774	23110110	3wt_3mu_merged_p20_peak_2206b	895	.	7.71575	89.5151	87.2074	249
1	23118610	23118683	3wt_3mu_merged_p20_peak_2207	331	.	6.49254	33.1503	31.2091	33
1	23118814	23118866	3wt_3mu_merged_p20_peak_2208	403	.	7.29268	40.3005	38.2897	25
1	23118934	23119059	3wt_3mu_merged_p20_peak_2209	443	.	7.54843	44.3932	42.3486	62
1	23123945	23124012	3wt_3mu_merged_p20_peak_2210	379	.	7.20108	37.9702	35.9788	23
1	2312834	2312975	3wt_3mu_merged_p20_peak_281	1126	.	14.269	112.621	110.224	77
1	23130644	23130823	3wt_3mu_merged_p20_peak_2211	931	.	12.6533	93.1519	90.8281	64
1	23131419	23131623	3wt_3mu_merged_p20_peak_2212a	320	.	5.70872	32.0811	30.1505	24
1	23131419	23131623	3wt_3mu_merged_p20_peak_2212b	455	.	6.89462	45.5764	43.52	168
1	23135266	23135322	3wt_3mu_merged_p20_peak_2213	475	.	5.34626	47.5414	45.4697	29
1	23135812	23135943	3wt_3mu_merged_p20_peak_2214	640	.	6.55735	64.002	61.8208	77
1	23136042	23136094	3wt_3mu_merged_p20_peak_2215	225	.	3.76956	22.5275	20.7209	45
1	23136589	23136694	3wt_3mu_merged_p20_peak_2216	448	.	5.20212	44.8711	42.8212	37
1	23136790	23137054	3wt_3mu_merged_p20_peak_2217	1914	.	12.336	191.415	188.809	110
1	23137316	23137370	3wt_3mu_merged_p20_peak_2218	371	.	4.71879	37.1244	35.1412	28
1	23141217	23141420	3wt_3mu_merged_p20_peak_2219	1462	.	11.7515	146.274	143.776	88
1	23147189	23147336	3wt_3mu_merged_p20_peak_2220a	335	.	6.68672	33.5063	31.559	25
1	23147189	23147336	3wt_3mu_merged_p20_peak_2220b	317	.	6.48097	31.7662	29.8377	114
1	23150720	23150930	3wt_3mu_merged_p20_peak_2221	690	.	9.30603	69.0893	66.879	98
1	23156833	23156994	3wt_3mu_merged_p20_peak_2222	2162	.	9.16149	216.281	213.626	101
1	23157202	23157259	3wt_3mu_merged_p20_peak_2223	313	.	3.30761	31.3471	29.4252	25
1	23157374	23157427	3wt_3mu_merged_p20_peak_2224	488	.	3.98015	48.8589	46.7782	30
1	23157498	23157790	3wt_3mu_merged_p20_peak_2225	14545	.	31.7562	1454.56	1450.85	206
1	23161184	23161251	3wt_3mu_merged_p20_peak_2226	331	.	3.38269	33.1994	31.2579	34
1	23162309	23162386	3wt_3mu_merged_p20_peak_2227	624	.	5.07477	62.4344	60.2616	39
1	23185152	23185340	3wt_3mu_merged_p20_peak_2228a	493	.	8.32157	49.3464	47.2607	48
1	23185152	23185340	3wt_3mu_merged_p20_peak_2228b	563	.	9.05673	56.3997	54.265	131
1	23188805	23188996	3wt_3mu_merged_p20_peak_2229	1743	.	19.34	174.373	171.805	103
1	23196945	23197016	3wt_3mu_merged_p20_peak_2230	512	.	8.64129	51.2542	49.1545	38
1	23210688	23210810	3wt_3mu_merged_p20_peak_2231	1533	.	17.6941	153.319	150.801	73
1	2321410	2321479	3wt_3mu_merged_p20_peak_282	250	.	5.65799	25.0873	23.24	35
1	23215781	23215930	3wt_3mu_merged_p20_peak_2232a	250	.	5.65799	25.0873	23.24	38
1	23215781	23215930	3wt_3mu_merged_p20_peak_2232b	292	.	6.17235	29.2075	27.308	117
1	23219651	23219960	3wt_3mu_merged_p20_peak_2233	1084	.	13.9907	108.407	106.024	129
1	23225938	23226618	3wt_3mu_merged_p20_peak_2234a	1137	.	8.4669	113.766	111.365	129
1	23225938	23226618	3wt_3mu_merged_p20_peak_2234b	8660	.	32.6391	866.038	862.716	407
1	23225938	23226618	3wt_3mu_merged_p20_peak_2234c	1064	.	8.09062	106.424	104.05	601
1	2323665	2323827	3wt_3mu_merged_p20_peak_283a	227	.	5.34937	22.7074	20.8939	37
1	2323665	2323827	3wt_3mu_merged_p20_peak_283b	317	.	6.48097	31.7662	29.8377	125
1	2323935	2324119	3wt_3mu_merged_p20_peak_284	676	.	10.2873	67.6627	65.4597	73
1	23239384	23239467	3wt_3mu_merged_p20_peak_2235	582	.	9.3614	58.2847	56.1375	36
1	23239608	23239765	3wt_3mu_merged_p20_peak_2236a	283	.	6.06948	28.3687	26.4793	18
1	23239608	23239765	3wt_3mu_merged_p20_peak_2236b	335	.	6.68672	33.5063	31.559	119
1	23254393	23254545	3wt_3mu_merged_p20_peak_2237	4317	.	36.4999	431.723	428.772	43
1	23268484	23268650	3wt_3mu_merged_p20_peak_2238a	4430	.	29.3251	443.004	440.041	42
1	23268484	23268650	3wt_3mu_merged_p20_peak_2238b	1998	.	16.7998	199.842	197.218	116
1	23273825	23273911	3wt_3mu_merged_p20_peak_2239	1275	.	7.70131	127.594	125.149	48
1	23274373	23274573	3wt_3mu_merged_p20_peak_2240	16626	.	43.3496	1662.66	1658.82	120
1	23274684	23274817	3wt_3mu_merged_p20_peak_2241	5636	.	19.9294	563.621	560.539	59
1	23294334	23294546	3wt_3mu_merged_p20_peak_2242	16125	.	57.2823	1612.58	1608.77	133
1	23294685	23294826	3wt_3mu_merged_p20_peak_2243a	408	.	5.06179	40.8566	38.8396	16
1	23294685	23294826	3wt_3mu_merged_p20_peak_2243b	2048	.	13.1206	204.816	202.183	90
1	2329685	2329799	3wt_3mu_merged_p20_peak_285	655	.	10.0815	65.5474	63.3563	51
1	23308219	23308636	3wt_3mu_merged_p20_peak_2244a	6774	.	16.0194	677.494	674.315	151
1	23308219	23308636	3wt_3mu_merged_p20_peak_2244b	10230	.	21.215	1023.09	1019.66	250
1	23308219	23308636	3wt_3mu_merged_p20_peak_2244c	10652	.	21.8332	1065.22	1061.76	338
1	23311604	23312080	3wt_3mu_merged_p20_peak_2245a	6744	.	15.881	674.47	671.293	93
1	23311604	23312080	3wt_3mu_merged_p20_peak_2245b	4377	.	12.0032	437.781	434.823	386
1	23337741	23338028	3wt_3mu_merged_p20_peak_2246	4905	.	34.7752	490.559	487.547	152
1	23350278	23350462	3wt_3mu_merged_p20_peak_2247	13986	.	70.616	1398.65	1394.98	94
1	233656	233730	3wt_3mu_merged_p20_peak_54	840	.	11.8303	84.0558	81.771	32
1	23369506	23369707	3wt_3mu_merged_p20_peak_2248	8417	.	18.8072	841.732	838.428	128
1	23370395	23370671	3wt_3mu_merged_p20_peak_2249	9923	.	20.9348	992.361	988.952	136
1	23370839	23370915	3wt_3mu_merged_p20_peak_2250	458	.	3.53409	45.8534	43.7956	25
1	23372401	23372588	3wt_3mu_merged_p20_peak_2251	6714	.	16.1448	671.406	668.233	101
1	23372652	23372765	3wt_3mu_merged_p20_peak_2252	402	.	3.34452	40.2218	38.2114	36
1	23389587	23389684	3wt_3mu_merged_p20_peak_2253	1807	.	18.8503	180.779	178.197	60
1	23394009	23394184	3wt_3mu_merged_p20_peak_2254	1764	.	19.2103	176.4	173.827	118
1	23409667	23409755	3wt_3mu_merged_p20_peak_2255	897	.	12.3447	89.7138	87.4042	39
1	23434046	23434100	3wt_3mu_merged_p20_peak_2256	655	.	10.0815	65.5474	63.3563	27
1	23489044	23489295	3wt_3mu_merged_p20_peak_2257	11773	.	47.0219	1177.34	1173.81	104
1	235016	235131	3wt_3mu_merged_p20_peak_55	512	.	8.64129	51.2542	49.1545	43
1	23506232	23506353	3wt_3mu_merged_p20_peak_2258	1455	.	17.0768	145.586	143.089	62
1	23507956	23508019	3wt_3mu_merged_p20_peak_2259	390	.	5.95346	39.0935	37.0926	31
1	23511702	23511916	3wt_3mu_merged_p20_peak_2260	4924	.	29.203	492.411	489.397	98
1	23515668	23515946	3wt_3mu_merged_p20_peak_2261a	460	.	6.72018	46.0236	43.9649	78
1	23515668	23515946	3wt_3mu_merged_p20_peak_2261b	899	.	10.0668	89.9527	87.6424	231
1	23524656	23524729	3wt_3mu_merged_p20_peak_2262	388	.	7.30395	38.8817	36.8819	43
1	23526301	23526420	3wt_3mu_merged_p20_peak_2263	300	.	6.27523	30.0534	28.1441	49
1	235339	235399	3wt_3mu_merged_p20_peak_56	326	.	6.58384	32.6329	30.6949	34
1	23535007	23535193	3wt_3mu_merged_p20_peak_2264	741	.	10.9045	74.111	71.8737	71
1	23535562	23535778	3wt_3mu_merged_p20_peak_2265	718	.	10.6798	71.8628	69.6387	111
1	23540537	23540683	3wt_3mu_merged_p20_peak_2266	931	.	12.6533	93.1519	90.8281	87
1	23546532	23546655	3wt_3mu_merged_p20_peak_2267	542	.	8.94991	54.2377	52.1171	74
1	23549857	23549963	3wt_3mu_merged_p20_peak_2268	836	.	10.8761	83.6134	81.3314	60
1	23557611	23558099	3wt_3mu_merged_p20_peak_2269a	799	.	4.91674	79.95	77.6847	37
1	23557611	23558099	3wt_3mu_merged_p20_peak_2269b	1317	.	6.44442	131.774	129.315	201
1	23557611	23558099	3wt_3mu_merged_p20_peak_2269c	8023	.	19.8877	802.35	799.075	404
1	23559302	23559519	3wt_3mu_merged_p20_peak_2270	13077	.	28.1211	1307.76	1304.14	105
1	23586397	23586467	3wt_3mu_merged_p20_peak_2271	204	.	4.80541	20.4909	18.7126	0
1	23586900	23586973	3wt_3mu_merged_p20_peak_2272	726	.	10.4236	72.6203	70.3917	29
1	23595400	23595499	3wt_3mu_merged_p20_peak_2273	468	.	4.06147	46.8992	44.8334	39
1	23595597	23596127	3wt_3mu_merged_p20_peak_2274a	7031	.	20.1058	703.143	699.944	67
1	23595597	23596127	3wt_3mu_merged_p20_peak_2274b	19985	.	42.4053	1998.56	1994.5	315
1	23612410	23612490	3wt_3mu_merged_p20_peak_2275	807	.	11.5217	80.7059	78.4365	47
1	23619404	23619530	3wt_3mu_merged_p20_peak_2276	1072	.	13.8878	107.214	104.836	67
1	23620434	23620542	3wt_3mu_merged_p20_peak_2277	1932	.	20.7803	193.282	190.672	70
1	23628068	23628168	3wt_3mu_merged_p20_peak_2278	2495	.	24.8952	249.532	246.819	48
1	2364165	2364421	3wt_3mu_merged_p20_peak_286a	613	.	9.67002	61.3699	59.2034	46
1	2364165	2364421	3wt_3mu_merged_p20_peak_286b	473	.	8.2298	47.3483	45.2776	205
1	23661938	23662176	3wt_3mu_merged_p20_peak_2279	6588	.	32.9611	658.843	655.679	119
1	23674068	23674152	3wt_3mu_merged_p20_peak_2280	350	.	5.90265	35.0982	33.1375	58
1	23674640	23674722	3wt_3mu_merged_p20_peak_2281	408	.	6.52123	40.8796	38.8625	51
1	23690251	23690393	3wt_3mu_merged_p20_peak_2282	988	.	13.1514	98.8806	96.5348	57
1	2369098	2369290	3wt_3mu_merged_p20_peak_287	582	.	9.3614	58.2847	56.1375	123
1	23743862	23744213	3wt_3mu_merged_p20_peak_2283a	5689	.	25.7391	568.942	565.856	88
1	23743862	23744213	3wt_3mu_merged_p20_peak_2283b	5603	.	25.3595	560.362	557.284	206
1	23745180	23745268	3wt_3mu_merged_p20_peak_2284	330	.	4.44819	33.0504	31.1099	50
1	23751204	23751261	3wt_3mu_merged_p20_peak_2285	426	.	5.98968	42.6347	40.6022	28
1	23751973	23752344	3wt_3mu_merged_p20_peak_2286a	3027	.	21.2054	302.769	299.974	182
1	23751973	23752344	3wt_3mu_merged_p20_peak_2286b	1404	.	12.6966	140.462	137.979	315
1	23752779	23752917	3wt_3mu_merged_p20_peak_2287	699	.	8.44047	69.9785	67.7632	82
1	23783646	23783881	3wt_3mu_merged_p20_peak_2288a	2995	.	17.4617	299.591	296.801	101
1	23783646	23783881	3wt_3mu_merged_p20_peak_2288b	380	.	4.97397	38.0623	36.0704	206
1	23784125	23784309	3wt_3mu_merged_p20_peak_2289	2129	.	13.7178	212.967	210.318	94
1	23784390	23784516	3wt_3mu_merged_p20_peak_2290	519	.	5.84281	51.9207	49.8177	68
1	23784924	23785048	3wt_3mu_merged_p20_peak_2291	1616	.	11.5818	161.677	159.139	57
1	23790575	23790758	3wt_3mu_merged_p20_peak_2292	739	.	7.47131	73.9266	71.6915	115
1	23790815	23790953	3wt_3mu_merged_p20_peak_2293a	512	.	6.02977	51.2663	49.1664	26
1	23790815	23790953	3wt_3mu_merged_p20_peak_2293b	463	.	5.69425	46.3647	44.3043	120
1	23793486	23793592	3wt_3mu_merged_p20_peak_2294	972	.	7.31434	97.2416	94.9019	71
1	23793650	23793744	3wt_3mu_merged_p20_peak_2295	475	.	4.94253	47.5978	45.5259	53
1	23796615	23796741	3wt_3mu_merged_p20_peak_2296	2186	.	12.5624	218.646	215.986	52
1	23796894	23797140	3wt_3mu_merged_p20_peak_2297a	332	.	4.25327	33.2918	31.3497	33
1	23796894	23797140	3wt_3mu_merged_p20_peak_2297b	788	.	6.75283	78.8996	76.6393	128
1	23800854	23800965	3wt_3mu_merged_p20_peak_2298	705	.	7.93465	70.5571	68.3395	65
1	23809950	23810089	3wt_3mu_merged_p20_peak_2299	796	.	10.4464	79.6089	77.3448	75
1	23813961	23814140	3wt_3mu_merged_p20_peak_2300	647	.	8.19604	64.7849	62.5987	92
1	23822945	23823145	3wt_3mu_merged_p20_peak_2301a	608	.	9.02791	60.8296	58.6674	41
1	23822945	23823145	3wt_3mu_merged_p20_peak_2301b	796	.	10.712	79.6301	77.3659	142
1	23834617	23834935	3wt_3mu_merged_p20_peak_2302a	3261	.	18.6745	326.106	323.28	70
1	23834617	23834935	3wt_3mu_merged_p20_peak_2302b	1210	.	9.67221	121.023	118.598	184
1	23835268	23835426	3wt_3mu_merged_p20_peak_2303	636	.	6.63313	63.697	61.5171	44
1	2383833	2384339	3wt_3mu_merged_p20_peak_288a	1919	.	13.3837	191.913	189.307	118
1	2383833	2384339	3wt_3mu_merged_p20_peak_288b	1260	.	10.2121	126.006	123.566	299
1	23841689	23841994	3wt_3mu_merged_p20_peak_2304a	500	.	5.29302	50.0817	47.9925	54
1	23841689	23841994	3wt_3mu_merged_p20_peak_2304b	872	.	7.1929	87.286	84.988	240
1	23844046	23844171	3wt_3mu_merged_p20_peak_2305	959	.	7.64388	95.9841	93.6492	65
1	23844465	23844591	3wt_3mu_merged_p20_peak_2306	4352	.	20.4789	435.232	432.277	79
1	23844671	23844805	3wt_3mu_merged_p20_peak_2307	327	.	4.36644	32.7139	30.7754	63
1	23845143	23845229	3wt_3mu_merged_p20_peak_2308	349	.	4.48907	34.9505	32.9907	47
1	23849062	23849140	3wt_3mu_merged_p20_peak_2309	996	.	8.81296	99.6187	97.2696	34
1	23853190	23853289	3wt_3mu_merged_p20_peak_2310	1121	.	11.5545	112.14	109.745	47
1	23854290	23854622	3wt_3mu_merged_p20_peak_2311a	774	.	9.89834	77.4613	75.2075	87
1	23854290	23854622	3wt_3mu_merged_p20_peak_2311b	1108	.	12.5498	110.856	108.465	255
1	2386035	2386394	3wt_3mu_merged_p20_peak_289a	1055	.	8.71637	105.535	103.164	71
1	2386035	2386394	3wt_3mu_merged_p20_peak_289b	723	.	6.96075	72.3397	70.1121	245
1	23866545	23866647	3wt_3mu_merged_p20_peak_2312	695	.	10.0114	69.5102	67.2983	37
1	23873530	23873588	3wt_3mu_merged_p20_peak_2313	285	.	6.01718	28.5758	26.685	25
1	2387637	2387723	3wt_3mu_merged_p20_peak_290	678	.	6.53328	67.8444	65.6407	48
1	23877089	23877198	3wt_3mu_merged_p20_peak_2314	283	.	6.06948	28.3687	26.4793	62
1	23883392	23883496	3wt_3mu_merged_p20_peak_2315	317	.	6.48097	31.7662	29.8377	83
1	23888961	23889024	3wt_3mu_merged_p20_peak_2316	335	.	6.68672	33.5063	31.559	29
1	23889825	23889898	3wt_3mu_merged_p20_peak_2317	407	.	7.5097	40.7229	38.7066	38
1	23903007	23903071	3wt_3mu_merged_p20_peak_2318	275	.	5.96661	27.5371	25.658	26
1	23915467	23915523	3wt_3mu_merged_p20_peak_2319	593	.	9.46427	59.3084	57.1547	28
1	23920003	23920075	3wt_3mu_merged_p20_peak_2320	326	.	6.58384	32.6329	30.6949	27
1	23920250	23920310	3wt_3mu_merged_p20_peak_2321	370	.	7.09821	37.0648	35.0819	31
1	23922504	23922585	3wt_3mu_merged_p20_peak_2322	708	.	10.5959	70.868	68.6476	45
1	2392287	2392392	3wt_3mu_merged_p20_peak_291	370	.	7.09821	37.0648	35.0819	34
1	23928076	23928270	3wt_3mu_merged_p20_peak_2323	1316	.	15.9452	131.657	129.199	132
1	23935464	23935636	3wt_3mu_merged_p20_peak_2324	1315	.	12.9693	131.526	129.069	69
1	23935722	23935865	3wt_3mu_merged_p20_peak_2325	326	.	5.59305	32.6752	30.737	85
1	23940105	23940203	3wt_3mu_merged_p20_peak_2326	1156	.	10.4868	115.601	113.195	36
1	23945024	23945106	3wt_3mu_merged_p20_peak_2327	545	.	4.70122	54.5613	52.4392	27
1	23946073	23946500	3wt_3mu_merged_p20_peak_2328a	1745	.	9.27083	174.505	171.936	74
1	23946073	23946500	3wt_3mu_merged_p20_peak_2328b	13773	.	37.3079	1377.4	1373.73	311
1	23962216	23962569	3wt_3mu_merged_p20_peak_2329a	241	.	5.01153	24.1815	22.3513	64
1	23962216	23962569	3wt_3mu_merged_p20_peak_2329b	600	.	8.42	60.0813	57.9243	186
1	23962216	23962569	3wt_3mu_merged_p20_peak_2329c	1623	.	15.8941	162.373	159.833	286
1	23970527	23970682	3wt_3mu_merged_p20_peak_2330	335	.	6.68672	33.5063	31.559	36
1	23975828	23975911	3wt_3mu_merged_p20_peak_2331	315	.	6.20993	31.5067	29.5838	52
1	23978468	23978738	3wt_3mu_merged_p20_peak_2332	2597	.	20.8753	259.783	257.052	182
1	23981267	23981421	3wt_3mu_merged_p20_peak_2333	622	.	8.52009	62.2336	60.0636	52
1	23998816	23999034	3wt_3mu_merged_p20_peak_2334	2366	.	23.9693	236.608	233.916	95
1	2400346	2400442	3wt_3mu_merged_p20_peak_292	1019	.	13.1961	101.949	99.5915	62
1	2400895	2401053	3wt_3mu_merged_p20_peak_293	3623	.	31.4325	362.332	359.46	98
1	24014310	24014438	3wt_3mu_merged_p20_peak_2335	697	.	10.493	69.7953	67.5807	29
1	24014561	24014650	3wt_3mu_merged_p20_peak_2336	473	.	8.2298	47.3483	45.2776	43
1	24020518	24020633	3wt_3mu_merged_p20_peak_2337	265	.	5.71441	26.5101	24.6475	33
1	24021424	24021573	3wt_3mu_merged_p20_peak_2338	1080	.	13.2623	108.009	105.628	86
1	24028992	24029467	3wt_3mu_merged_p20_peak_2339a	691	.	8.48446	69.1462	66.9357	33
1	24028992	24029467	3wt_3mu_merged_p20_peak_2339b	3281	.	23.9819	328.114	325.286	307
1	24034416	24034482	3wt_3mu_merged_p20_peak_2340	408	.	6.35494	40.8895	38.8723	36
1	24035421	24035910	3wt_3mu_merged_p20_peak_2341a	416	.	6.33674	41.666	39.6416	72
1	24035421	24035910	3wt_3mu_merged_p20_peak_2341b	782	.	9.1731	78.203	75.9465	170
1	24035421	24035910	3wt_3mu_merged_p20_peak_2341c	1901	.	16.1513	190.176	187.573	310
1	24043840	24044203	3wt_3mu_merged_p20_peak_2342	3631	.	24.7623	363.125	360.252	161
1	24044369	24044428	3wt_3mu_merged_p20_peak_2343	328	.	5.41242	32.8552	30.9158	32
1	24052225	24052313	3wt_3mu_merged_p20_peak_2344	336	.	6.02968	33.6563	31.7082	52
1	24053437	24053781	3wt_3mu_merged_p20_peak_2345a	1364	.	14.3773	136.439	133.968	85
1	24053437	24053781	3wt_3mu_merged_p20_peak_2345b	1495	.	15.2585	149.527	147.019	214
1	24059173	24059622	3wt_3mu_merged_p20_peak_2346a	3261	.	20.0805	326.184	323.358	135
1	24059173	24059622	3wt_3mu_merged_p20_peak_2346b	987	.	9.22092	98.7141	96.3688	332
1	24063492	24063655	3wt_3mu_merged_p20_peak_2347	921	.	8.029	92.1799	89.8602	57
1	24065714	24065814	3wt_3mu_merged_p20_peak_2348	295	.	4.89743	29.5306	27.629	35
1	24069403	24069539	3wt_3mu_merged_p20_peak_2349	801	.	9.21523	80.1815	77.9154	70
1	24069680	24069800	3wt_3mu_merged_p20_peak_2350	947	.	9.66132	94.7003	92.3706	60
1	24076051	24076342	3wt_3mu_merged_p20_peak_2351	32113	.	39.3385	3211.39	3206.49	108
1	24077505	24077589	3wt_3mu_merged_p20_peak_2352	671	.	3.6505	67.1077	64.9086	46
1	24079258	24079354	3wt_3mu_merged_p20_peak_2353	602	.	3.51834	60.2495	58.0918	44
1	24080892	24081037	3wt_3mu_merged_p20_peak_2354	876	.	4.27599	87.6691	85.3686	92
1	24082106	24082218	3wt_3mu_merged_p20_peak_2355	509	.	5.14965	50.9778	48.8818	58
1	24092376	24092676	3wt_3mu_merged_p20_peak_2356a	1672	.	17.8005	167.222	164.67	76
1	24092376	24092676	3wt_3mu_merged_p20_peak_2356b	1913	.	19.7784	191.324	188.718	235
1	24103054	24103575	3wt_3mu_merged_p20_peak_2357a	1923	.	13.7171	192.387	189.779	99
1	24103054	24103575	3wt_3mu_merged_p20_peak_2357b	461	.	5.77237	46.1222	44.063	259
1	24103054	24103575	3wt_3mu_merged_p20_peak_2357c	805	.	7.94495	80.5276	78.2603	361
1	24103654	24103809	3wt_3mu_merged_p20_peak_2358	739	.	7.54035	73.9421	71.707	95
1	24103954	24104025	3wt_3mu_merged_p20_peak_2359	286	.	4.44434	28.6385	26.7473	29
1	24107002	24107121	3wt_3mu_merged_p20_peak_2360	461	.	5.40689	46.1389	44.0797	64
1	24109728	24109797	3wt_3mu_merged_p20_peak_2361	254	.	5.37415	25.4521	23.6022	40
[truncated: 168,600 more rows]

## Sheet: ATAC_PeaksDown
Omni-ATAC-seq peaks down in linc-mipep; linc-wrb mutant brains compared to WT brains at 5dpf
1	10048398	10048622	3wt_3mu_merged_p20_peak_870	934	.	12.0999	93.4222	91.0975	69	3wt_3mu_merged_p20_peak_870	18856.2	0.996484	0.256455	3.88561	0.000102074	0.00585552	15964.5	10987.9	10817.1	21262.2	31989.8	22115.6
1	16519795	16520094	3wt_3mu_merged_p20_peak_1472a	679	.	9.55257	67.9591	65.7549	59	3wt_3mu_merged_p20_peak_1472a	52802	0.926292	0.185759	4.98653	6.14725e-07	7.8616e-05	36257.2	40112.8	32854.6	63603.9	75382.1	68601
1	16519795	16520094	3wt_3mu_merged_p20_peak_1472b	6253	.	44.5865	625.351	622.215	158	3wt_3mu_merged_p20_peak_1472b	52802	0.926292	0.185759	4.98653	6.14725e-07	7.8616e-05	36257.2	40112.8	32854.6	63603.9	75382.1	68601
1	16964290	16964383	3wt_3mu_merged_p20_peak_1506	343	.	6.78959	34.3862	32.4298	25	3wt_3mu_merged_p20_peak_1506	5377.36	1.21136	0.324712	3.73057	0.000191047	0.00964459	3568.6	3515.67	2642.53	5467.71	9514.72	7554.93
1	1776310	1776385	3wt_3mu_merged_p20_peak_231	309	.	6.3781	30.9063	28.9874	63	3wt_3mu_merged_p20_peak_231	3674.13	12.5674	1.23732	10.157	3.08514e-24	3.56675e-21	0	0	0	6898.03	5912.22	9234.51
1	2033543	2033603	3wt_3mu_merged_p20_peak_240	463	.	8.12693	46.3852	44.322	33	3wt_3mu_merged_p20_peak_240	3832.84	3.41948	0.410021	8.33977	7.44357e-17	4.54519e-14	459.325	975.923	526.86	4666.32	8021.79	8346.82
1	20682579	20682648	3wt_3mu_merged_p20_peak_1922	335	.	6.68672	33.5063	31.559	29	3wt_3mu_merged_p20_peak_1922	3981.3	1.34837	0.348072	3.87384	0.000107134	0.00607546	2549.84	2657.33	1522.95	5589.44	6171.86	5396.38
1	21538625	21538770	3wt_3mu_merged_p20_peak_2019	7502	.	43.0566	750.275	747.039	52	3wt_3mu_merged_p20_peak_2019	39908.7	0.900446	0.229819	3.91806	8.92653e-05	0.00525255	23296	32499.4	27734.2	39820.9	63958	52143.7
1	21562950	21563081	3wt_3mu_merged_p20_peak_2021	1964	.	20.8771	196.431	193.815	102	3wt_3mu_merged_p20_peak_2021	17067.6	1.49983	0.247733	6.05424	1.41082e-09	3.33322e-07	8738.95	10458.8	7548.91	28794.2	27776.1	19088.5
1	22851631	22851752	3wt_3mu_merged_p20_peak_2168	1721	.	13.8734	172.169	169.606	50	3wt_3mu_merged_p20_peak_2168	18221.3	1.81164	0.23785	7.61677	2.60109e-14	1.30367e-11	7790.85	6390.53	10068	28347.9	25623.2	31107.4
1	22930989	22931227	3wt_3mu_merged_p20_peak_2173a	795	.	11.4189	79.5969	77.3328	67	3wt_3mu_merged_p20_peak_2173a	30708.9	1.04025	0.23066	4.50986	6.48701e-06	0.000598379	21711.9	22099.4	16464.4	42925	49255.9	31797.1
1	22930989	22931227	3wt_3mu_merged_p20_peak_2173b	2906	.	27.7756	290.647	287.87	178	3wt_3mu_merged_p20_peak_2173b	30708.9	1.04025	0.23066	4.50986	6.48701e-06	0.000598379	21711.9	22099.4	16464.4	42925	49255.9	31797.1
1	23511702	23511916	3wt_3mu_merged_p20_peak_2260	4924	.	29.203	492.411	489.397	98	3wt_3mu_merged_p20_peak_2260	51853.6	0.857081	0.229777	3.73005	0.000191443	0.00964761	26305.2	41888.2	42478.1	58258	77659.4	64533
1	23783646	23783881	3wt_3mu_merged_p20_peak_2288a	2995	.	17.4617	299.591	296.801	101	3wt_3mu_merged_p20_peak_2288a	37135.3	1.26342	0.222858	5.66915	1.43506e-08	2.78369e-06	23372.6	25115.3	17024.2	61803.3	50435.1	45061.3
1	23783646	23783881	3wt_3mu_merged_p20_peak_2288b	380	.	4.97397	38.0623	36.0704	206	3wt_3mu_merged_p20_peak_2288b	37135.3	1.26342	0.222858	5.66915	1.43506e-08	2.78369e-06	23372.6	25115.3	17024.2	61803.3	50435.1	45061.3
1	23940105	23940203	3wt_3mu_merged_p20_peak_2326	1156	.	10.4868	115.601	113.195	36	3wt_3mu_merged_p20_peak_2326	11540.2	2.50823	0.274936	9.12297	7.30903e-20	5.65849e-17	4652.13	3015.95	2675.46	21870.8	19732.6	17294
1	24153926	24154106	3wt_3mu_merged_p20_peak_2375	2087	.	18.3022	208.757	206.116	74	3wt_3mu_merged_p20_peak_2375	27330.7	1.13652	0.243436	4.66868	3.03144e-06	0.000311065	20675.5	19130.4	11451	38902.9	37231.3	36593.2
1	2419156	2419210	3wt_3mu_merged_p20_peak_295	352	.	6.89246	35.2727	33.3073	29	3wt_3mu_merged_p20_peak_295	3034.97	12.2921	1.24723	9.85546	6.49205e-23	6.58377e-20	0	0	0	7836.37	5609.3	4764.14
1	24288624	24288855	3wt_3mu_merged_p20_peak_2404	2242	.	16.8995	224.206	221.537	149	3wt_3mu_merged_p20_peak_2404	34622.1	0.982394	0.207011	4.74562	2.0787e-06	0.000227714	19998.3	28419.3	21387.2	47926.1	44403.8	45597.8
1	24468372	24468532	3wt_3mu_merged_p20_peak_2415	3257	.	23.7494	325.717	322.891	62	3wt_3mu_merged_p20_peak_2415	32247.8	1.12344	0.27301	4.11502	3.87153e-05	0.00267271	13909.3	24950.7	22012.9	32304.1	58895	41414.8
1	24661865	24661967	3wt_3mu_merged_p20_peak_2437	603	.	9.56715	60.3368	58.1767	37	3wt_3mu_merged_p20_peak_2437	7250.85	1.31503	0.282962	4.64739	3.36165e-06	0.000339921	4805.24	4180.01	3482.21	8404.44	12089.5	10543.7
1	25845491	25845600	3wt_3mu_merged_p20_peak_2576	1359	.	13.6094	135.945	133.475	44	3wt_3mu_merged_p20_peak_2576	13202.6	0.935092	0.228995	4.08345	4.43713e-05	0.00298128	9893.15	8083.7	9228.28	18173.3	18721.1	15116.2
1	26333419	26333525	3wt_3mu_merged_p20_peak_2635	960	.	10.9187	96.0482	93.7132	58	3wt_3mu_merged_p20_peak_2635	10694	2.85786	0.267481	10.6844	1.20482e-26	1.75576e-23	2938.5	2157.61	2683.69	23539.5	15697.4	17147.1
1	26333617	26333690	3wt_3mu_merged_p20_peak_2636	856	.	10.0624	85.6446	83.3533	31	3wt_3mu_merged_p20_peak_2636	6684.35	2.47723	0.377154	6.56822	5.09193e-11	1.59968e-08	1837.3	3051.23	1210.13	15794.5	8205.7	10007.2
1	27484160	27484592	3wt_3mu_merged_p20_peak_2796a	3320	.	15.6514	332.046	329.212	130	3wt_3mu_merged_p20_peak_2796a	130319	0.806576	0.204863	3.93714	8.24582e-05	0.00491732	84975.1	106734	92719.1	128354	195179	173955
1	27484160	27484592	3wt_3mu_merged_p20_peak_2796b	3211	.	15.3087	321.18	318.361	300	3wt_3mu_merged_p20_peak_2796b	130319	0.806576	0.204863	3.93714	8.24582e-05	0.00491732	84975.1	106734	92719.1	128354	195179	173955
1	28072478	28072671	3wt_3mu_merged_p20_peak_2827	2264	.	22.5912	226.458	223.784	102	3wt_3mu_merged_p20_peak_2827	22228.6	1.06623	0.275228	3.87399	0.000107068	0.00607385	9551.6	14350.8	19213.9	23539.5	35787	30928.6
1	28408177	28408254	3wt_3mu_merged_p20_peak_2837	329	.	4.59641	32.9003	30.9606	46	3wt_3mu_merged_p20_peak_2837	6608.2	1.22797	0.286084	4.29232	1.76813e-05	0.00141105	4552.03	4315.22	2988.28	8947.16	9011.67	9834.82
1	29165783	29165874	3wt_3mu_merged_p20_peak_2888	582	.	9.3614	58.2847	56.1375	54	3wt_3mu_merged_p20_peak_2888	5388.69	8.59933	1.90744	4.50831	6.53447e-06	0.000602436	0	82.3067	0	17179.1	10434.3	4636.41
1	31654962	31655017	3wt_3mu_merged_p20_peak_3174	806	.	9.70571	80.641	78.3732	29	3wt_3mu_merged_p20_peak_3174	5347.13	1.26467	0.310928	4.06742	4.7537e-05	0.00315487	3191.72	3827.26	2403.8	6558.2	8438.3	7663.49
1	31791771	31791846	3wt_3mu_merged_p20_peak_3187	1205	.	15.0194	120.51	118.086	33	3wt_3mu_merged_p20_peak_3187	7428.49	3.01082	0.313348	9.60856	7.3571e-22	6.75047e-19	1059.98	1622.62	2247.39	13745.3	13084.8	12810.8
1	32341448	32341520	3wt_3mu_merged_p20_peak_3255	552	.	9.05278	55.2421	53.1148	38	3wt_3mu_merged_p20_peak_3255	4639.26	2.17236	0.528336	4.11171	3.92738e-05	0.00270681	317.994	2139.97	2601.37	7831.3	8973.81	5971.14
1	32341660	32341730	3wt_3mu_merged_p20_peak_3256	379	.	7.20108	37.9702	35.9788	28	3wt_3mu_merged_p20_peak_3256	4222.99	2.15429	0.433479	4.96976	6.70347e-07	8.51016e-05	624.21	1652.01	2379.1	6426.33	7589.06	6667.24
1	34290975	34291140	3wt_3mu_merged_p20_peak_3462	2342	.	15.5436	234.244	231.556	52	3wt_3mu_merged_p20_peak_3462	26727.6	1.49425	0.290804	5.13836	2.77142e-07	3.8265e-05	20875.7	7995.51	13138.6	39643.4	39871	38841.1
1	36179761	36179951	3wt_3mu_merged_p20_peak_3644	1678	.	16.3165	167.863	165.31	75	3wt_3mu_merged_p20_peak_3644	23892.1	0.896189	0.223144	4.0162	5.91442e-05	0.00378052	16659.4	19894.7	13541.9	30113	35056.8	28086.7
1	39944579	39944734	3wt_3mu_merged_p20_peak_4122	2280	.	23.3521	228.075	225.398	47	3wt_3mu_merged_p20_peak_4122	23175.7	6.08271	0.700987	8.67735	4.05081e-18	2.73337e-15	618.322	1046.47	353.984	18812.4	78021.8	40201.4
1	39966402	39966592	3wt_3mu_merged_p20_peak_4125a	5790	.	46.1898	579.055	575.961	36	3wt_3mu_merged_p20_peak_4125a	28710.3	5.99303	0.880722	6.80468	1.01273e-11	3.55515e-09	423.992	276.315	1967.49	57172.5	53361.4	59060
1	39966402	39966592	3wt_3mu_merged_p20_peak_4125b	603	.	9.56715	60.3368	58.1767	163	3wt_3mu_merged_p20_peak_4125b	28710.3	5.99303	0.880722	6.80468	1.01273e-11	3.55515e-09	423.992	276.315	1967.49	57172.5	53361.4	59060
1	40158308	40158368	3wt_3mu_merged_p20_peak_4158	335	.	6.68672	33.5063	31.559	27	3wt_3mu_merged_p20_peak_4158	3366.05	1.44878	0.384261	3.7703	0.000163049	0.00855788	2049.29	1440.37	1926.33	3596.11	6777.68	4406.51
1	44389692	44389772	3wt_3mu_merged_p20_peak_4679	490	.	4.64731	49.0081	46.9266	51	3wt_3mu_merged_p20_peak_4679	9586.82	2.48602	0.284635	8.73403	2.45745e-18	1.69112e-15	3827.71	2580.9	2296.78	14186.6	19359.4	15269.5
1	48108	48175	3wt_3mu_merged_p20_peak_18	788	.	4.93536	78.8576	76.5975	31	3wt_3mu_merged_p20_peak_18	12078.4	1.41624	0.245765	5.76258	8.28364e-09	1.68013e-06	6872.2	6949.04	5927.17	14196.8	20803.7	17721.8
1	494233	494379	3wt_3mu_merged_p20_peak_79	2891	.	27.6727	289.156	286.381	91	3wt_3mu_merged_p20_peak_79	23178.6	2.14787	0.25742	8.34384	7.19162e-17	4.40686e-14	5594.34	9341.81	10677.1	33516.3	41369.3	38572.9
1	52137464	52137722	3wt_3mu_merged_p20_peak_5717a	12624	.	34.1195	1262.45	1258.86	78	3wt_3mu_merged_p20_peak_5717a	205942	0.879468	0.222821	3.94698	7.91431e-05	0.00475657	156871	146206	132052	189554	347463	263503
1	52137464	52137722	3wt_3mu_merged_p20_peak_5717b	14884	.	38.3858	1488.5	1484.77	149	3wt_3mu_merged_p20_peak_5717b	205942	0.879468	0.222821	3.94698	7.91431e-05	0.00475657	156871	146206	132052	189554	347463	263503
1	53321266	53321493	3wt_3mu_merged_p20_peak_5881	25129	.	43.2394	2512.91	2508.52	106	3wt_3mu_merged_p20_peak_5881	213091	1.08151	0.263387	4.10617	4.02268e-05	0.00275839	209782	100191	100301	258960	320926	288384
1	53485096	53485199	3wt_3mu_merged_p20_peak_5903	1957	.	18.2561	195.739	193.124	55	3wt_3mu_merged_p20_peak_5903	14192.3	1.04139	0.277894	3.74743	0.000178653	0.00915521	12937.6	7813.26	7087.91	22337.5	18277.6	16700
1	53537856	53537934	3wt_3mu_merged_p20_peak_5909	931	.	12.6533	93.1519	90.8281	42	3wt_3mu_merged_p20_peak_5909	6596.21	1.26304	0.334067	3.78079	0.000156333	0.00827555	2944.39	3850.78	4848.76	6203.16	9558	12172.2
1	53974726	53974815	3wt_3mu_merged_p20_peak_5953	1276	.	13.9813	127.646	125.201	46	3wt_3mu_merged_p20_peak_5953	9025.5	1.20891	0.300099	4.02836	5.61682e-05	0.00363722	5152.68	5396.97	5803.69	8130.55	16730.5	12938.5
1	54594807	54595017	3wt_3mu_merged_p20_peak_6062	1830	.	19.505	183.001	180.413	111	3wt_3mu_merged_p20_peak_6062	23469.1	3.58979	0.711565	5.04491	4.53727e-07	5.98809e-05	2920.83	2998.32	4881.68	82213.4	31362.3	16438.2
1	54595072	54595172	3wt_3mu_merged_p20_peak_6063	991	.	12.8914	99.1473	96.7997	60	3wt_3mu_merged_p20_peak_6063	9204.5	2.28189	0.337819	6.75479	1.43046e-11	4.90246e-09	2856.06	2945.4	3622.16	23646.1	9314.58	12842.7
1	54771901	54772112	3wt_3mu_merged_p20_peak_6089a	370	.	7.09821	37.0648	35.0819	24	3wt_3mu_merged_p20_peak_6089a	12040.1	1.71578	0.352928	4.86157	1.16459e-06	0.000138707	9056.94	3280.51	4519.47	24493.1	16757.6	14132.8
1	54771901	54772112	3wt_3mu_merged_p20_peak_6089b	562	.	9.15566	56.2515	54.1174	115	3wt_3mu_merged_p20_peak_6089b	12040.1	1.71578	0.352928	4.86157	1.16459e-06	0.000138707	9056.94	3280.51	4519.47	24493.1	16757.6	14132.8
1	54771901	54772112	3wt_3mu_merged_p20_peak_6089c	275	.	5.96661	27.5371	25.658	195	3wt_3mu_merged_p20_peak_6089c	12040.1	1.71578	0.352928	4.86157	1.16459e-06	0.000138707	9056.94	3280.51	4519.47	24493.1	16757.6	14132.8
1	55888901	55889024	3wt_3mu_merged_p20_peak_6216	2513	.	10.4936	251.393	248.676	84	3wt_3mu_merged_p20_peak_6216	32643.2	1.12155	0.230086	4.87448	1.09093e-06	0.00013147	21505.8	23110.6	17048.8	36605.2	56352.7	41236
1	56458508	56458673	3wt_3mu_merged_p20_peak_6271	5030	.	41.5605	503.019	499.995	59	3wt_3mu_merged_p20_peak_6271	36290.8	1.4511	0.28523	5.08747	3.62872e-07	4.8971e-05	10682.2	24674.4	22959.6	42615.6	60160.7	56652.4
1	56518316	56518428	3wt_3mu_merged_p20_peak_6273	1481	.	17.2826	148.154	145.65	69	3wt_3mu_merged_p20_peak_6273	10920.1	1.5639	0.340306	4.59556	4.31593e-06	0.000419066	4063.26	8818.58	3671.55	14105.5	20652.2	14209.4
1	56752946	56752998	3wt_3mu_merged_p20_peak_6277	492	.	8.43555	49.2908	47.2054	29	3wt_3mu_merged_p20_peak_6277	3481.72	12.4899	1.23684	10.0982	5.62425e-24	6.37474e-21	0	0	0	7501.61	5603.9	7784.83
1	57142019	57142082	3wt_3mu_merged_p20_peak_6281	292	.	6.17235	29.2075	27.308	22	3wt_3mu_merged_p20_peak_6281	2865.26	12.2091	1.25429	9.73385	2.16247e-22	2.02707e-19	0	0	0	7019.76	6372	3799.82
1	57174152	57174267	3wt_3mu_merged_p20_peak_6282	2524	.	25.1009	252.424	249.706	57	3wt_3mu_merged_p20_peak_6282	19437.6	1.29364	0.213503	6.05914	1.36854e-09	3.2555e-07	11253.5	12110.8	10421.9	24168.5	31497.6	27173.5
1	57227051	57227135	3wt_3mu_merged_p20_peak_6283	1254	.	15.4309	125.435	122.996	53	3wt_3mu_merged_p20_peak_6283	8584.84	13.7921	1.21114	11.3876	4.81813e-30	1.05765e-26	0	0	0	18320.4	18953.7	14234.9
1	57269447	57269671	3wt_3mu_merged_p20_peak_6285a	3112	.	22.9575	311.286	308.48	52	3wt_3mu_merged_p20_peak_6285a	40993	1.51209	0.253694	5.96028	2.51802e-09	5.62714e-07	14445.2	25773.8	23634.6	58841.2	74938.6	48324.7
1	57269447	57269671	3wt_3mu_merged_p20_peak_6285b	2315	.	18.6847	231.564	228.881	112	3wt_3mu_merged_p20_peak_6285b	40993	1.51209	0.253694	5.96028	2.51802e-09	5.62714e-07	14445.2	25773.8	23634.6	58841.2	74938.6	48324.7
1	57319899	57320332	3wt_3mu_merged_p20_peak_6302a	8487	.	20.6367	848.785	845.476	47	3wt_3mu_merged_p20_peak_6302a	223960	0.854512	0.179803	4.75248	2.00935e-06	0.000221381	154292	153196	171040	298802	322294	244133
1	57319899	57320332	3wt_3mu_merged_p20_peak_6302b	11489	.	25.4786	1148.94	1145.43	160	3wt_3mu_merged_p20_peak_6302b	223960	0.854512	0.179803	4.75248	2.00935e-06	0.000221381	154292	153196	171040	298802	322294	244133
1	57319899	57320332	3wt_3mu_merged_p20_peak_6302c	1719	.	7.46935	171.982	169.419	292	3wt_3mu_merged_p20_peak_6302c	223960	0.854512	0.179803	4.75248	2.00935e-06	0.000221381	154292	153196	171040	298802	322294	244133
1	57319899	57320332	3wt_3mu_merged_p20_peak_6302d	1512	.	6.94467	151.274	148.762	389	3wt_3mu_merged_p20_peak_6302d	223960	0.854512	0.179803	4.75248	2.00935e-06	0.000221381	154292	153196	171040	298802	322294	244133
1	57347727	57348187	3wt_3mu_merged_p20_peak_6308a	38624	.	59.094	3862.41	3856.97	82	3wt_3mu_merged_p20_peak_6308a	368444	0.912508	0.173725	5.25259	1.49975e-07	2.20782e-05	239338	250130	277515	447327	544038	452319
1	57347727	57348187	3wt_3mu_merged_p20_peak_6308b	1640	.	6.94673	164.014	161.47	359	3wt_3mu_merged_p20_peak_6308b	368444	0.912508	0.173725	5.25259	1.49975e-07	2.20782e-05	239338	250130	277515	447327	544038	452319
1	57347727	57348187	3wt_3mu_merged_p20_peak_6308c	3752	.	11.3822	375.283	372.395	425	3wt_3mu_merged_p20_peak_6308c	368444	0.912508	0.173725	5.25259	1.49975e-07	2.20782e-05	239338	250130	277515	447327	544038	452319
1	57387011	57387077	3wt_3mu_merged_p20_peak_6320	1190	.	14.6959	119.065	116.647	35	3wt_3mu_merged_p20_peak_6320	6869.38	4.00254	0.420993	9.50737	1.95537e-21	1.7479e-18	276.773	1111.14	1037.25	10357.2	16568.3	11865.6
1	57450012	57450111	3wt_3mu_merged_p20_peak_6326	1443	.	16.1042	144.337	141.843	36	3wt_3mu_merged_p20_peak_6326	11386.8	1.78117	0.252207	7.06236	1.63703e-12	6.55629e-10	6024.22	4767.91	4601.79	15388.7	21106.6	16431.8
1	57676238	57676348	3wt_3mu_merged_p20_peak_6330	4050	.	35.3882	405.072	402.15	66	3wt_3mu_merged_p20_peak_6330	21660.2	1.36335	0.310012	4.39773	1.09387e-05	0.000934918	7190.2	13245.5	15945.7	20141.2	36219.8	37219
1	57678567	57678626	3wt_3mu_merged_p20_peak_6331	629	.	8.87329	62.9163	60.7415	31	3wt_3mu_merged_p20_peak_6331	4915.87	1.51159	0.370509	4.07977	4.50801e-05	0.00302188	1813.74	2745.52	3103.53	5761.89	10591.1	5479.4
1	57993869	57994018	3wt_3mu_merged_p20_peak_6346	3655	.	32.8163	365.559	362.683	70	3wt_3mu_merged_p20_peak_6346	26562.7	15.4215	1.21411	12.7019	5.77217e-37	2.70537e-33	0	0	0	31325.2	71730.9	56320.3
1	58035181	58035464	3wt_3mu_merged_p20_peak_6350a	637	.	4.64741	63.7462	61.5661	34	3wt_3mu_merged_p20_peak_6350a	107685	1.12822	0.184385	6.11883	9.42631e-10	2.34194e-07	58976.1	70272.3	73562.8	147476	163898	131927
1	58035181	58035464	3wt_3mu_merged_p20_peak_6350b	8517	.	22.4287	851.7	848.389	170	3wt_3mu_merged_p20_peak_6350b	107685	1.12822	0.184385	6.11883	9.42631e-10	2.34194e-07	58976.1	70272.3	73562.8	147476	163898	131927
1	58036240	58036575	3wt_3mu_merged_p20_peak_6351a	2947	.	11.0601	294.799	292.016	82	3wt_3mu_merged_p20_peak_6351a	120870	0.708972	0.169314	4.18732	2.8227e-05	0.0020821	97117.7	82730	95419.2	150681	152025	147248
1	58036240	58036575	3wt_3mu_merged_p20_peak_6351b	4322	.	14.1227	432.209	429.258	286	3wt_3mu_merged_p20_peak_6351b	120870	0.708972	0.169314	4.18732	2.8227e-05	0.0020821	97117.7	82730	95419.2	150681	152025	147248
1	58036688	58036857	3wt_3mu_merged_p20_peak_6352	3416	.	12.1244	341.662	338.815	70	3wt_3mu_merged_p20_peak_6352	49917	1.15741	0.219148	5.28141	1.28194e-07	1.92641e-05	23631.7	37138	31940.9	61696.8	79801.4	65293
1	58077943	58078026	3wt_3mu_merged_p20_peak_6353	1316	.	15.9452	131.657	129.199	36	3wt_3mu_merged_p20_peak_6353	8618.25	13.7976	1.23424	11.179	5.16853e-29	9.74245e-26	0	0	0	9921	26851.1	14937.4
1	58091612	58091729	3wt_3mu_merged_p20_peak_6354	1036	.	13.5792	103.653	101.288	39	3wt_3mu_merged_p20_peak_6354	10771.8	14.1194	1.45429	9.7088	2.76579e-22	2.57867e-19	0	0	0	8997.88	36365.8	19267.3
1	5841	5999	3wt_3mu_merged_p20_peak_1	757	.	9.58068	75.7968	73.5519	77	3wt_3mu_merged_p20_peak_1	14191.3	1.71976	0.272042	6.32167	2.58744e-10	7.21388e-08	7926.3	4826.7	7079.68	25715.5	16519.6	23079.9
1	58664957	58665270	3wt_3mu_merged_p20_peak_6389	4421	.	22.5714	442.103	439.141	217	3wt_3mu_merged_p20_peak_6389	52689.8	0.942165	0.215406	4.3739	1.22046e-05	0.00102942	31852.4	42681.9	33677.9	61174.4	85508.1	61244.1
1	58676661	58676973	3wt_3mu_merged_p20_peak_6392	27974	.	37.3799	2797.47	2792.88	196	3wt_3mu_merged_p20_peak_6392	346090	0.924203	0.201075	4.59632	4.30028e-06	0.00041778	194530	245486	276626	386995	534880	438026
1	58720018	58720102	3wt_3mu_merged_p20_peak_6399	1310	.	13.0013	131.001	128.545	44	3wt_3mu_merged_p20_peak_6399	10191.1	4.82301	0.955466	5.04781	4.469e-07	5.91149e-05	1642.97	276.315	164.644	15500.3	23535.3	20027.3
1	58761467	58761727	3wt_3mu_merged_p20_peak_6414	2699	.	13.1697	269.921	267.175	106	3wt_3mu_merged_p20_peak_6414	63837.8	1.36186	0.201805	6.7484	1.4948e-11	5.10281e-09	35903.9	30976.7	40411.8	77278.3	106788	91668.2
1	58820835	58821029	3wt_3mu_merged_p20_peak_6423	1662	.	17.7631	166.203	163.654	73	3wt_3mu_merged_p20_peak_6423	24308	2.52862	0.234269	10.7937	3.68815e-27	5.92208e-24	7496.41	8183.64	5853.08	33125.8	49639.9	41548.9
1	58841430	58841507	3wt_3mu_merged_p20_peak_6428	354	.	3.31919	35.4358	33.4694	25	3wt_3mu_merged_p20_peak_6428	9953.66	1.70036	0.290023	5.86286	4.54959e-09	9.69253e-07	3409.6	4462.2	6190.6	13522.2	18445.3	13692.1
1	58966287	58966465	3wt_3mu_merged_p20_peak_6447	3516	.	21.0339	351.61	348.752	65	3wt_3mu_merged_p20_peak_6447	39401.1	0.905946	0.241051	3.75831	0.000171064	0.00886589	18555.5	31905.6	31809.2	51461.4	57964.6	44710.1
1	59069267	59069354	3wt_3mu_merged_p20_peak_6472	2577	.	16.8949	257.757	255.031	45	3wt_3mu_merged_p20_peak_6472	18081.2	1.71915	0.214208	8.02561	1.01026e-15	5.66975e-13	9422.04	7913.2	7935.82	25492.3	30908	26815.8
1	59071637	59071879	3wt_3mu_merged_p20_peak_6473	5033	.	28.9791	503.34	500.315	141	3wt_3mu_merged_p20_peak_6473	41335.3	2.14175	0.219605	9.75276	1.79521e-22	1.69195e-19	14580.6	13915.7	17328.7	52912	82857.6	66417
1	59192089	59192181	3wt_3mu_merged_p20_peak_6488	720	.	3.96893	72.0529	69.8264	55	3wt_3mu_merged_p20_peak_6488	19501.2	0.856531	0.218259	3.92438	8.69542e-05	0.00515001	14462.8	15026.9	12134.2	22271.5	28971.5	24140
1	59236269	59236392	3wt_3mu_merged_p20_peak_6501	3969	.	10.0326	396.985	394.072	71	3wt_3mu_merged_p20_peak_6501	43791	1.40844	0.19235	7.32227	2.43813e-13	1.07313e-10	26652.6	24209.9	21025	58663.7	62367.7	69827.2
1	59237073	59237322	3wt_3mu_merged_p20_peak_6503	15892	.	25.6349	1589.22	1585.43	79	3wt_3mu_merged_p20_peak_6503	166467	1.16848	0.190608	6.13028	8.77235e-10	2.19836e-07	106634	94758.6	106146	187089	268895	235282
1	59243521	59243633	3wt_3mu_merged_p20_peak_6506	1113	.	7.952	111.351	108.958	68	3wt_3mu_merged_p20_peak_6506	15873.3	1.63274	0.250011	6.53065	6.54838e-11	1.99577e-08	7466.97	8230.67	7524.21	17554.5	30042.5	24421
1	59251662	59251801	3wt_3mu_merged_p20_peak_6509	649	.	4.10907	64.9789	62.7918	76	3wt_3mu_merged_p20_peak_6509	21385	1.86846	0.268097	6.96933	3.18445e-12	1.22992e-09	7561.19	10723.4	9302.37	36483.5	42213.1	22026.2
1	59252513	59252820	3wt_3mu_merged_p20_peak_6510a	417	.	3.33042	41.7516	39.7267	25	3wt_3mu_merged_p20_peak_6510a	86703.6	3.96542	0.19997	19.83	1.64026e-87	3.16052e-83	9651.71	11552.3	10092.7	144194	199252	145479
1	59252513	59252820	3wt_3mu_merged_p20_peak_6510b	5286	.	13.3684	528.696	525.647	222	3wt_3mu_merged_p20_peak_6510b	86703.6	3.96542	0.19997	19.83	1.64026e-87	3.16052e-83	9651.71	11552.3	10092.7	144194	199252	145479
1	59498105	59498256	3wt_3mu_merged_p20_peak_6553	5732	.	34.2525	573.25	570.161	78	3wt_3mu_merged_p20_peak_6553	36296.8	2.3909	0.201647	11.8569	1.98245e-32	5.3717e-29	12619.7	10253.1	12002.5	51806.3	65959.4	65139.7
1	59542341	59542394	3wt_3mu_merged_p20_peak_6558	366	.	4.4636	36.6282	34.6513	26	3wt_3mu_merged_p20_peak_6558	4986.69	2.57491	0.485595	5.30258	1.14178e-07	1.73992e-05	1177.76	1681.41	1440.63	2495.47	14988.8	8136.08
1	59574355	59574504	3wt_3mu_merged_p20_peak_6566	1665	.	6.53868	166.524	163.974	89	3wt_3mu_merged_p20_peak_6566	42442.6	0.694247	0.183976	3.77356	0.000160932	0.00846986	29320.2	33616.4	34336.4	55001.7	49055.7	53325.1
1	5960671	5960726	3wt_3mu_merged_p20_peak_485	370	.	7.09821	37.0648	35.0819	25	3wt_3mu_merged_p20_peak_485	3281.01	1.57897	0.386143	4.08908	4.33079e-05	0.00293055	2220.07	1322.79	1391.24	3707.69	5890.58	5153.7
2	10063591	10063898	3wt_3mu_merged_p20_peak_59919	19736	.	36.0547	1973.64	1969.6	109	3wt_3mu_merged_p20_peak_59919	225540	2.3932	0.205069	11.6702	1.80946e-31	4.41957e-28	62238.5	83229.7	70936.7	294505	406915	435414
2	10262404	10262687	3wt_3mu_merged_p20_peak_59945a	1430	.	16.8711	143.03	140.539	87	3wt_3mu_merged_p20_peak_59945a	22543.2	0.801331	0.203031	3.94685	7.91866e-05	0.00475657	17018.6	16890.5	15402.4	25030.7	30448.2	30468.8
2	10262404	10262687	3wt_3mu_merged_p20_peak_59945b	542	.	8.94991	54.2377	52.1171	231	3wt_3mu_merged_p20_peak_59945b	22543.2	0.801331	0.203031	3.94685	7.91866e-05	0.00475657	17018.6	16890.5	15402.4	25030.7	30448.2	30468.8
2	10279745	10279894	3wt_3mu_merged_p20_peak_59947	1517	.	11.0317	151.751	149.238	58	3wt_3mu_merged_p20_peak_59947	19698.4	2.25755	0.262288	8.60716	7.48908e-18	4.97596e-15	5223.35	8671.6	6544.58	24259.8	37025.7	36465.5
2	10342756	10342825	3wt_3mu_merged_p20_peak_59956	578	.	5.1169	57.8836	55.7402	40	3wt_3mu_merged_p20_peak_59956	8615.13	1.552	0.262035	5.92288	3.16355e-09	6.92689e-07	4369.47	3603.86	5178.04	11584.6	13620.3	13334.5
2	10363030	10363433	3wt_3mu_merged_p20_peak_59958a	1263	.	11.2928	126.345	123.904	78	3wt_3mu_merged_p20_peak_59958a	68156.9	1.06716	0.184274	5.79118	6.98942e-09	1.44639e-06	44760.6	47890.8	39456.9	82507.6	93838.2	100488
2	10363030	10363433	3wt_3mu_merged_p20_peak_59958b	2317	.	16.8112	231.772	229.089	213	3wt_3mu_merged_p20_peak_59958b	68156.9	1.06716	0.184274	5.79118	6.98942e-09	1.44639e-06	44760.6	47890.8	39456.9	82507.6	93838.2	100488
2	104850	105135	3wt_3mu_merged_p20_peak_58796a	11150	.	30.7726	1115.05	1111.55	104	3wt_3mu_merged_p20_peak_58796a	108914	1.17095	0.228502	5.12444	2.98421e-07	4.08775e-05	56956.3	64064	79959.2	107107	164909	180488
2	104850	105135	3wt_3mu_merged_p20_peak_58796b	575	.	4.81197	57.5564	55.4145	253	3wt_3mu_merged_p20_peak_58796b	108914	1.17095	0.228502	5.12444	2.98421e-07	4.08775e-05	56956.3	64064	79959.2	107107	164909	180488
2	10509182	10509251	3wt_3mu_merged_p20_peak_59972	361	.	6.99533	36.1656	34.1914	41	3wt_3mu_merged_p20_peak_59972	4004.91	2.74933	0.397583	6.9151	4.67521e-12	1.73609e-09	541.768	1369.82	1201.9	5751.74	7194.19	7970.03
2	10509488	10509604	3wt_3mu_merged_p20_peak_59973	1611	.	18.3113	161.142	158.605	38	3wt_3mu_merged_p20_peak_59973	13854.9	3.23558	0.265268	12.1974	3.2087e-34	1.07008e-30	2361.4	3062.99	2551.98	17818.2	27300.1	30034.5
2	10889841	10889917	3wt_3mu_merged_p20_peak_59997	920	.	12.5505	92.0023	89.6832	33	3wt_3mu_merged_p20_peak_59997	6332.7	6.52691	1.4367	4.543	5.54605e-06	0.000520159	0	129.339	279.894	11295.5	10044.8	16246.6
2	11129242	11129365	3wt_3mu_merged_p20_peak_60018	2802	.	27.0555	280.245	277.483	57	3wt_3mu_merged_p20_peak_60018	20486.7	2.08634	0.297813	7.00556	2.45996e-12	9.71747e-10	5653.23	8977.31	8800.2	19421	39184	40884.7
2	11210843	11210940	3wt_3mu_merged_p20_peak_60031	2418	.	19.9595	241.838	239.137	54	3wt_3mu_merged_p20_peak_60031	15400.6	2.54254	0.384694	6.60926	3.86249e-11	1.2404e-08	2602.84	6954.92	3976.14	12005.6	34683.6	32180.3
2	115374	115497	3wt_3mu_merged_p20_peak_58798	1235	.	9.3428	123.507	121.075	82	3wt_3mu_merged_p20_peak_58798	17034.8	2.2843	0.271918	8.4007	4.43812e-17	2.78856e-14	3721.71	7448.76	6239.99	27130.6	25915.3	31752.4
2	11685023	11685158	3wt_3mu_merged_p20_peak_60080a	590	.	8.42265	59.0087	56.8583	27	3wt_3mu_merged_p20_peak_60080a	12792.6	1.54201	0.361235	4.26871	1.96608e-05	0.00153997	4328.25	9765.11	5523.79	10260.8	26748.3	20129.4
2	11685023	11685158	3wt_3mu_merged_p20_peak_60080b	1120	.	12.6396	112.025	109.63	105	3wt_3mu_merged_p20_peak_60080b	12792.6	1.54201	0.361235	4.26871	1.96608e-05	0.00153997	4328.25	9765.11	5523.79	10260.8	26748.3	20129.4
2	11916649	11916758	3wt_3mu_merged_p20_peak_60103	516	.	3.5252	51.6333	49.5317	59	3wt_3mu_merged_p20_peak_60103	19559.4	1.06352	0.221406	4.8035	1.55912e-06	0.000178821	10546.8	13662.9	13772.4	27521.1	22999.8	28853.1
2	12101509	12101587	3wt_3mu_merged_p20_peak_60114	1757	.	19.4429	175.709	173.138	50	3wt_3mu_merged_p20_peak_60114	8724.13	1.24424	0.284181	4.37834	1.19588e-05	0.00101213	3651.04	5996.63	5894.24	12299.8	13723.1	10780
2	12255738	12255917	3wt_3mu_merged_p20_peak_60130	5231	.	31.1978	523.19	520.146	57	3wt_3mu_merged_p20_peak_60130	46422.4	1.99361	0.286405	6.96081	3.38319e-12	1.28945e-09	14686.6	26302.9	14908.5	93148.8	46773.1	82714.7
2	12540043	12540159	3wt_3mu_merged_p20_peak_60170a	276	.	5.51709	27.6221	25.7423	22	3wt_3mu_merged_p20_peak_60170a	7094.66	1.22333	0.28883	4.23547	2.28073e-05	0.00175006	5305.79	3833.14	3622.16	11696.2	8595.16	9515.51
2	12540043	12540159	3wt_3mu_merged_p20_peak_60170b	418	.	7.00101	41.8709	39.8454	80	3wt_3mu_merged_p20_peak_60170b	7094.66	1.22333	0.28883	4.23547	2.28073e-05	0.00175006	5305.79	3833.14	3622.16	11696.2	8595.16	9515.51
2	12588144	12588486	3wt_3mu_merged_p20_peak_60173a	7061	.	35.0164	706.146	702.945	95	3wt_3mu_merged_p20_peak_60173a	97769.6	1.00551	0.189758	5.29893	1.16482e-07	1.76572e-05	54812.7	65398.6	74838.8	138498	117866	135203
2	12588144	12588486	3wt_3mu_merged_p20_peak_60173b	358	.	5.16747	35.8399	33.8711	307	3wt_3mu_merged_p20_peak_60173b	97769.6	1.00551	0.189758	5.29893	1.16482e-07	1.76572e-05	54812.7	65398.6	74838.8	138498	117866	135203
2	12599672	12599867	3wt_3mu_merged_p20_peak_60174a	296	.	4.69455	29.6388	27.7364	19	3wt_3mu_merged_p20_peak_60174a	13712.7	1.76463	0.291176	6.06035	1.3583e-09	3.2457e-07	7390.42	6937.28	4371.29	24102.5	14523.6	24951.1
2	12599672	12599867	3wt_3mu_merged_p20_peak_60174b	421	.	5.6609	42.1554	40.1284	113	3wt_3mu_merged_p20_peak_60174b	13712.7	1.76463	0.291176	6.06035	1.3583e-09	3.2457e-07	7390.42	6937.28	4371.29	24102.5	14523.6	24951.1
2	12847253	12847415	3wt_3mu_merged_p20_peak_60188	3756	.	15.9296	375.68	372.792	71	3wt_3mu_merged_p20_peak_60188	42280.1	0.739618	0.196104	3.77155	0.000162234	0.00851771	29791.3	32746.3	32484.2	58242.7	43846.7	56569.4
2	13722309	13722517	3wt_3mu_merged_p20_peak_60253	1021	.	8.45037	102.171	99.8122	116	3wt_3mu_merged_p20_peak_60253	26545.8	1.03805	0.22857	4.54152	5.58489e-06	0.000523235	19215.1	13392.5	19559.7	39689.1	30058.7	37359.5
2	14317657	14317838	3wt_3mu_merged_p20_peak_60280a	1047	.	13.0234	104.733	102.365	51	3wt_3mu_merged_p20_peak_60280a	18131	0.994335	0.239123	4.15826	3.20686e-05	0.00228543	9745.93	13122	13492.5	19623.9	28035.7	24765.9
2	14317657	14317838	3wt_3mu_merged_p20_peak_60280b	855	.	11.413	85.5166	83.2257	137	3wt_3mu_merged_p20_peak_60280b	18131	0.994335	0.239123	4.15826	3.20686e-05	0.00228543	9745.93	13122	13492.5	19623.9	28035.7	24765.9
2	14676159	14676231	3wt_3mu_merged_p20_peak_60305	1217	.	15.1223	121.737	119.309	36	3wt_3mu_merged_p20_peak_60305	8392.16	1.57785	0.362683	4.3505	1.35829e-05	0.00112113	5241.01	4956.04	2428.49	9079.03	10007	18641.5
2	14712117	14712242	3wt_3mu_merged_p20_peak_60308	3116	.	29.2158	311.685	308.878	82	3wt_3mu_merged_p20_peak_60308	19092.4	1.75871	0.236645	7.43185	1.07086e-13	4.93895e-11	7260.86	9012.59	9862.15	31340.4	23308.1	33770.5
2	14730093	14730212	3wt_3mu_merged_p20_peak_60314	5080	.	41.8691	508.023	504.994	53	3wt_3mu_merged_p20_peak_60314	29391	1.39292	0.346686	4.01782	5.87385e-05	0.00376283	8933.28	17748.9	21955.2	22347.6	43446.4	61914.6
2	14886099	14886270	3wt_3mu_merged_p20_peak_60325a	1321	.	14.566	132.123	129.664	61	3wt_3mu_merged_p20_peak_60325a	21631.2	1.44897	0.266545	5.43612	5.4454e-08	9.00209e-06	9416.16	12275.5	13105.6	20653.5	38215.8	36120.6
2	14886099	14886270	3wt_3mu_merged_p20_peak_60325b	1286	.	14.3196	128.619	126.171	125	3wt_3mu_merged_p20_peak_60325b	21631.2	1.44897	0.266545	5.43612	5.4454e-08	9.00209e-06	9416.16	12275.5	13105.6	20653.5	38215.8	36120.6
2	1515455	1515555	3wt_3mu_merged_p20_peak_58977	1417	.	16.7682	141.755	139.268	39	3wt_3mu_merged_p20_peak_58977	12572.7	1.30894	0.318674	4.10746	4.00032e-05	0.00274632	5700.34	7178.32	8816.67	9931.14	20965.9	22843.6
2	15215	15302	3wt_3mu_merged_p20_peak_58781	456	.	6.19795	45.6175	43.561	28	3wt_3mu_merged_p20_peak_58781	6555.22	1.03746	0.267389	3.87995	0.00010448	0.00596004	4151.59	4485.72	4247.81	9880.42	8697.94	7867.85
2	15253569	15253893	3wt_3mu_merged_p20_peak_60361a	696	.	10.3213	69.6722	67.4596	102	3wt_3mu_merged_p20_peak_60361a	27050.4	1.22475	0.253641	4.8287	1.37428e-06	0.00016027	16794.8	17019.9	14817.9	50152.8	25423.1	38094
2	15253569	15253893	3wt_3mu_merged_p20_peak_60361b	831	.	11.4822	83.1856	80.9051	236	3wt_3mu_merged_p20_peak_60361b	27050.4	1.22475	0.253641	4.8287	1.37428e-06	0.00016027	16794.8	17019.9	14817.9	50152.8	25423.1	38094
2	15373622	15373885	3wt_3mu_merged_p20_peak_60369a	3223	.	29.9359	322.317	319.496	83	3wt_3mu_merged_p20_peak_60369a	43801.7	0.876237	0.194944	4.49481	6.9631e-06	0.000631544	32547.3	32258.4	27874.2	59373.8	62470.5	48286.4
2	15373622	15373885	3wt_3mu_merged_p20_peak_60369b	1291	.	15.7395	129.16	126.709	208	3wt_3mu_merged_p20_peak_60369b	43801.7	0.876237	0.194944	4.49481	6.9631e-06	0.000631544	32547.3	32258.4	27874.2	59373.8	62470.5	48286.4
2	15440362	15440491	3wt_3mu_merged_p20_peak_60371	502	.	8.53842	50.2699	48.1773	53	3wt_3mu_merged_p20_peak_60371	8259.31	2.44819	0.307274	7.96743	1.62002e-15	8.80683e-13	2066.96	3568.58	2033.35	13826.5	16443.9	11616.6
2	155111	155175	3wt_3mu_merged_p20_peak_58801	494	.	5.67797	49.4277	47.3416	25	3wt_3mu_merged_p20_peak_58801	6123.76	1.36708	0.306758	4.45654	8.32917e-06	0.00073883	3986.7	3392.21	2881.26	9317.42	6582.95	10582
2	15610140	15610244	3wt_3mu_merged_p20_peak_60382	2323	.	23.6607	232.333	229.649	49	3wt_3mu_merged_p20_peak_60382	13243.2	1.49385	0.242569	6.15847	7.34533e-10	1.865e-07	5771	8395.29	6651.6	17732	19202.5	21706.8
2	15776160	15776216	3wt_3mu_merged_p20_peak_60399	358	.	6.69097	35.8073	33.8388	27	3wt_3mu_merged_p20_peak_60399	3461.32	2.11765	0.454103	4.66336	3.11083e-06	0.000317521	2314.29	787.793	782.057	5584.36	5079.21	6220.2
2	15982684	15982835	3wt_3mu_merged_p20_peak_60427	1247	.	12.9121	124.797	122.36	92	3wt_3mu_merged_p20_peak_60427	18795.2	2.24691	0.29336	7.65923	1.87044e-14	9.51215e-12	3686.38	9171.32	6766.85	29311.6	31265	32569.9
2	15997869	15997931	3wt_3mu_merged_p20_peak_60432	483	.	8.33268	48.3169	46.2388	38	3wt_3mu_merged_p20_peak_60432	3824.35	2.49858	0.386102	6.47129	9.71688e-11	2.89033e-08	1101.2	1058.23	1292.45	7765.36	3726.92	8001.97
2	16174007	16174127	3wt_3mu_merged_p20_peak_60445	1416	.	14.231	141.656	139.17	45	3wt_3mu_merged_p20_peak_60445	15515.4	2.10852	0.264796	7.96281	1.68179e-15	9.11405e-13	6777.98	6854.97	3877.36	23925	23519.1	28137.8
2	16241065	16241149	3wt_3mu_merged_p20_peak_60458	1040	.	13.1883	104.068	101.702	45	3wt_3mu_merged_p20_peak_60458	7901.16	2.26238	0.307534	7.35652	1.88766e-13	8.35076e-11	3109.27	3239.36	1819.31	15992.3	12051.6	11195.1
2	16262473	16262577	3wt_3mu_merged_p20_peak_60463	890	.	10.6958	89.0845	86.7782	56	3wt_3mu_merged_p20_peak_60463	9421.75	1.42207	0.266461	5.3369	9.455e-08	1.46006e-05	5335.23	3991.88	6042.42	14247.5	15086.2	11827.3
2	16266694	16266760	3wt_3mu_merged_p20_peak_60464	668	.	7.83581	66.811	64.613	28	3wt_3mu_merged_p20_peak_60464	5836.52	2.49226	0.426725	5.84043	5.20672e-09	1.09313e-06	624.21	2351.62	2313.24	7663.92	10986	11080.1
2	16305926	16305981	3wt_3mu_merged_p20_peak_60469	575	.	8.79757	57.5034	55.3617	24	3wt_3mu_merged_p20_peak_60469	4088.52	1.34247	0.339459	3.95474	7.66176e-05	0.00465747	2072.85	2910.13	1951.03	5619.87	5003.48	6973.78
2	16564293	16564615	3wt_3mu_merged_p20_peak_60502	3027	.	14.1001	302.777	299.983	137	3wt_3mu_merged_p20_peak_60502	64421.8	0.865198	0.2018	4.2874	1.80775e-05	0.00143386	36628.2	44757.2	55616.6	84384.3	84058.4	81086.2
2	16596660	16596790	3wt_3mu_merged_p20_peak_60507	2735	.	25.21	273.56	270.808	52	3wt_3mu_merged_p20_peak_60507	19213.1	1.46374	0.26128	5.60221	2.11638e-08	3.90441e-06	10694	12881	7087.91	31756.3	23118.8	29740.7
2	16855059	16855198	3wt_3mu_merged_p20_peak_60528	1379	.	16.4596	137.948	135.472	70	3wt_3mu_merged_p20_peak_60528	14527	1.14803	0.276754	4.14818	3.35125e-05	0.00237402	8721.28	10999.7	7376.04	16352.4	27229.7	16482.9
2	16972525	16972760	3wt_3mu_merged_p20_peak_60543a	403	.	6.60356	40.3983	38.3869	24	3wt_3mu_merged_p20_peak_60543a	51231.5	1.02853	0.182837	5.62539	1.85091e-08	3.48292e-06	30998.5	35133.2	34986.8	71394.7	61843	73033.1
2	16972525	16972760	3wt_3mu_merged_p20_peak_60543b	5522	.	37.6577	552.227	549.156	146	3wt_3mu_merged_p20_peak_60543b	51231.5	1.02853	0.182837	5.62539	1.85091e-08	3.48292e-06	30998.5	35133.2	34986.8	71394.7	61843	73033.1
2	17072425	17072790	3wt_3mu_merged_p20_peak_60551a	772	.	10.093	77.235	74.9835	46	3wt_3mu_merged_p20_peak_60551a	33323.8	0.879738	0.200993	4.37695	1.20352e-05	0.0010171	21423.4	22616.7	26367.7	47393.6	37361.1	44780.4
2	17072425	17072790	3wt_3mu_merged_p20_peak_60551b	967	.	11.6669	96.7292	94.3909	233	3wt_3mu_merged_p20_peak_60551b	33323.8	0.879738	0.200993	4.37695	1.20352e-05	0.0010171	21423.4	22616.7	26367.7	47393.6	37361.1	44780.4
2	17072425	17072790	3wt_3mu_merged_p20_peak_60551c	916	.	11.3169	91.6431	89.3262	325	3wt_3mu_merged_p20_peak_60551c	33323.8	0.879738	0.200993	4.37695	1.20352e-05	0.0010171	21423.4	22616.7	26367.7	47393.6	37361.1	44780.4
2	17190259	17190354	3wt_3mu_merged_p20_peak_60561	562	.	9.15566	56.2515	54.1174	50	3wt_3mu_merged_p20_peak_60561	6544.88	1.38377	0.360547	3.83798	0.000124053	0.00686562	2785.39	4462.2	3630.39	5193.81	10450.5	12746.9
2	17367934	17368228	3wt_3mu_merged_p20_peak_60569a	1291	.	15.7395	129.16	126.709	103	3wt_3mu_merged_p20_peak_60569a	21154.6	3.02856	0.744907	4.06569	4.78909e-05	0.00317228	2732.39	9277.14	1844.01	32263.5	26840.3	53970.2
2	17367934	17368228	3wt_3mu_merged_p20_peak_60569b	300	.	6.27523	30.0534	28.1441	187	3wt_3mu_merged_p20_peak_60569b	21154.6	3.02856	0.744907	4.06569	4.78909e-05	0.00317228	2732.39	9277.14	1844.01	32263.5	26840.3	53970.2
2	17367934	17368228	3wt_3mu_merged_p20_peak_60569c	300	.	6.27523	30.0534	28.1441	254	3wt_3mu_merged_p20_peak_60569c	21154.6	3.02856	0.744907	4.06569	4.78909e-05	0.00317228	2732.39	9277.14	1844.01	32263.5	26840.3	53970.2
2	17392748	17392851	3wt_3mu_merged_p20_peak_60573	2347	.	19.9561	234.722	232.034	42	3wt_3mu_merged_p20_peak_60573	16649.4	1.15804	0.223251	5.18716	2.13522e-07	3.01532e-05	8962.72	12216.7	9730.44	22504.8	21869.3	24612.6
2	174620	174867	3wt_3mu_merged_p20_peak_58806	1448	.	12.2099	144.838	142.343	170	3wt_3mu_merged_p20_peak_58806	25521.3	1.01329	0.221402	4.57671	4.72346e-06	0.000453808	17136.3	14715.3	18884.6	41444	29393.4	31554.4
2	1842045	1842362	3wt_3mu_merged_p20_peak_59015	1749	.	17.995	174.904	172.335	136	3wt_3mu_merged_p20_peak_59015	39025.7	1.2876	0.244258	5.27148	1.35329e-07	2.01616e-05	22459.8	28354.7	17221.7	56148	67463.1	42506.8
2	1854287	1854394	3wt_3mu_merged_p20_peak_59017	572	.	9.25853	57.2657	55.1251	48	3wt_3mu_merged_p20_peak_59017	7454.2	1.71009	0.370199	4.61938	3.84893e-06	0.000382283	2367.29	5685.04	2412.03	9322.49	14777.8	10160.5
2	18627794	18627917	3wt_3mu_merged_p20_peak_60672a	204	.	5.04075	20.4014	18.6238	30	3wt_3mu_merged_p20_peak_60672a	6142.79	1.39356	0.30613	4.55221	5.30865e-06	0.000501385	2661.73	4344.62	3152.93	7805.94	10353.1	8538.41
2	18627794	18627917	3wt_3mu_merged_p20_peak_60672b	258	.	5.76086	25.8963	24.0382	79	3wt_3mu_merged_p20_peak_60672b	6142.79	1.39356	0.30613	4.55221	5.30865e-06	0.000501385	2661.73	4344.62	3152.93	7805.94	10353.1	8538.41
2	18650934	18651098	3wt_3mu_merged_p20_peak_60675	624	.	9.77289	62.4075	60.2348	111	3wt_3mu_merged_p20_peak_60675	12204.3	1.06029	0.263187	4.02866	5.60947e-05	0.00363381	7166.64	10394.2	6165.9	15890.8	18115.3	15493
2	19096119	19096189	3wt_3mu_merged_p20_peak_60752	361	.	6.99533	36.1656	34.1914	28	3wt_3mu_merged_p20_peak_60752	3834.74	1.54276	0.360303	4.28185	1.85344e-05	0.00146298	2414.4	2157.61	1300.68	4914.85	5987.95	6232.98
2	1929437	1929521	3wt_3mu_merged_p20_peak_59020	512	.	8.64129	51.2542	49.1545	31	3wt_3mu_merged_p20_peak_59020	5892.17	2.52603	0.47342	5.3357	9.51745e-08	1.4684e-05	3256.49	546.752	1424.17	9155.11	8389.62	12580.9
2	19330173	19330254	3wt_3mu_merged_p20_peak_60777	562	.	9.15566	56.2515	54.1174	40	3wt_3mu_merged_p20_peak_60777	5514.48	3.63578	0.361115	10.0682	7.63573e-24	8.48819e-21	512.324	1152.29	798.522	9875.35	12695.3	8053.06
2	19426451	19426534	3wt_3mu_merged_p20_peak_60782	956	.	6.76479	95.6086	93.2749	30	3wt_3mu_merged_p20_peak_60782	11312.2	2.15359	0.290072	7.42433	1.13355e-13	5.21421e-11	5694.45	2774.91	3984.38	17270.4	17477	20672.3
2	19437552	19437620	3wt_3mu_merged_p20_peak_60787	427	.	5.51908	42.7517	40.7186	32	3wt_3mu_merged_p20_peak_60787	6479.36	2.0914	0.373234	5.60345	2.10121e-08	3.88055e-06	1531.08	1957.72	3910.29	7699.42	11445.8	12331.8
2	19453183	19453324	3wt_3mu_merged_p20_peak_60789	1150	.	10.0639	115.028	112.623	27	3wt_3mu_merged_p20_peak_60789	11639.4	3.38957	0.275434	12.3063	8.37664e-35	2.90529e-31	1784.3	1998.88	2305.01	23443.2	14875.2	25430
2	19453382	19453572	3wt_3mu_merged_p20_peak_60790	1586	.	12.3091	158.67	156.139	55	3wt_3mu_merged_p20_peak_60790	23589	3.32503	0.259415	12.8174	1.30973e-37	6.30913e-34	4263.48	3180.57	5408.54	43280.1	32855.3	52546
2	19460766	19460887	3wt_3mu_merged_p20_peak_60791	916	.	8.95322	91.6436	89.3267	33	3wt_3mu_merged_p20_peak_60791	11913.2	1.17438	0.252491	4.65117	3.3006e-06	0.000334332	6966.42	7742.71	7236.09	17524	12468.1	19541.9
2	19471986	19472065	3wt_3mu_merged_p20_peak_60796	3476	.	12.3214	347.659	344.805	36	3wt_3mu_merged_p20_peak_60796	23526.8	1.14591	0.248854	4.60475	4.12962e-06	0.000404829	14091.8	15508.9	14332.2	30564.4	23313.5	43349.8
2	2032151	2032241	3wt_3mu_merged_p20_peak_59029	1598	.	18.2084	159.832	157.298	41	3wt_3mu_merged_p20_peak_59029	10450.2	1.58766	0.345903	4.58989	4.43477e-06	0.000429163	6960.54	4615.06	4074.93	19674.6	19207.9	8168.01
2	20324156	20324242	3wt_3mu_merged_p20_peak_60908	811	.	10.3864	81.1852	78.9142	47	3wt_3mu_merged_p20_peak_60908	7835.45	2.63012	0.350969	7.49388	6.68662e-14	3.151e-11	1401.53	3533.31	1597.04	14024.3	12489.8	13966.7
2	20449075	20449189	3wt_3mu_merged_p20_peak_60932	483	.	8.33268	48.3169	46.2388	30	3wt_3mu_merged_p20_peak_60932	7174.16	1.25642	0.275663	4.55782	5.16876e-06	0.000490611	4204.59	3562.71	4939.31	9505.08	11624.3	9208.97
2	20817664	20817774	3wt_3mu_merged_p20_peak_60961	605	.	8.50656	60.5224	58.3615	72	3wt_3mu_merged_p20_peak_60961	8608.34	1.18696	0.267047	4.44478	8.79816e-06	0.000778043	5193.9	6372.89	4190.18	12639.6	12403.2	10850.2
2	20817854	20817956	3wt_3mu_merged_p20_peak_60962	683	.	9.04545	68.326	66.1203	38	3wt_3mu_merged_p20_peak_60962	9127.48	1.75218	0.366265	4.78391	1.71914e-06	0.0001946	2867.83	6937.28	2724.85	18386.3	12149	11699.6
2	20827940	20828113	3wt_3mu_merged_p20_peak_60964	1324	.	14.3363	132.462	130.003	84	3wt_3mu_merged_p20_peak_60964	19812.2	1.44748	0.212545	6.81023	9.7443e-12	3.43459e-09	11942.4	9641.65	10306.7	30939.7	25612.4	30430.5
2	20828256	20828384	3wt_3mu_merged_p20_peak_60965	721	.	9.55347	72.1032	69.8765	57	3wt_3mu_merged_p20_peak_60965	10636.8	1.63227	0.334494	4.87984	1.06175e-06	0.00012822	6424.66	6331.74	2798.94	17158.9	11673	19433.3
2	210660	210773	3wt_3mu_merged_p20_peak_58812	659	.	6.47143	65.9811	63.7883	36	3wt_3mu_merged_p20_peak_58812	12481	2.13997	0.396799	5.3931	6.92543e-08	1.11202e-05	1489.86	6772.67	5589.65	21429.6	22540	17064
2	21309363	21309516	3wt_3mu_merged_p20_peak_61019	3976	.	22.9999	397.63	394.716	61	3wt_3mu_merged_p20_peak_61019	36701.4	1.71769	0.229524	7.48369	7.22641e-14	3.38696e-11	13726.7	20400.3	17213.5	43832.9	61632	63402.6
2	21625430	21625573	3wt_3mu_merged_p20_peak_61058	2351	.	23.8664	235.181	232.492	55	3wt_3mu_merged_p20_peak_61058	20238.7	1.20112	0.314994	3.81314	0.00013721	0.00744693	9987.37	15973.4	10841.8	14840.9	34824.2	34964.7
2	2178056	2178166	3wt_3mu_merged_p20_peak_59046	1316	.	15.9452	131.657	129.199	63	3wt_3mu_merged_p20_peak_59046	12753.2	1.60689	0.284502	5.6481	1.6223e-08	3.10097e-06	5123.24	8195.4	5589.65	13725.1	22983.5	20902.2
2	2180671	2180767	3wt_3mu_merged_p20_peak_59047	2745	.	26.2437	274.504	271.751	58	3wt_3mu_merged_p20_peak_59047	15274.4	1.64218	0.274669	5.97875	2.24857e-09	5.11059e-07	6430.55	8642.21	7162	15175.7	28225	26011.2
2	21826954	21827096	3wt_3mu_merged_p20_peak_61096	580	.	5.41877	58.0433	55.8992	39	3wt_3mu_merged_p20_peak_61096	13501.9	0.986397	0.260308	3.78935	0.000151045	0.00805956	10111	10041.4	7013.82	14450.4	21826	17568.6
2	22193894	22194001	3wt_3mu_merged_p20_peak_61152	1546	.	17.7969	154.616	152.096	53	3wt_3mu_merged_p20_peak_61152	12828.4	1.5735	0.238462	6.59856	4.15158e-11	1.31859e-08	7802.63	5779.11	5770.76	17574.8	19862.5	20180.5
2	22504288	22504387	3wt_3mu_merged_p20_peak_61188	863	.	12.0361	86.308	84.0132	35	3wt_3mu_merged_p20_peak_61188	8302.54	1.36364	0.340714	4.00229	6.27331e-05	0.00395741	4811.13	4797.31	4330.13	6198.09	16395.2	13283.4
2	23306669	23306785	3wt_3mu_merged_p20_peak_61263	1024	.	13.4763	102.473	100.113	34	3wt_3mu_merged_p20_peak_61263	10073.2	2.17813	0.38177	5.70534	1.16114e-08	2.30389e-06	3497.93	5643.89	1786.38	10134	20792.8	18584
2	23901987	23902109	3wt_3mu_merged_p20_peak_61300	1168	.	14.7108	116.847	114.436	45	3wt_3mu_merged_p20_peak_61300	10121.1	2.59507	0.345568	7.50957	5.9321e-14	2.84177e-11	2426.18	2980.68	3218.78	8617.47	24714.5	18769.2
2	23994205	23994288	3wt_3mu_merged_p20_peak_61308	1455	.	17.0768	145.586	143.089	43	3wt_3mu_merged_p20_peak_61308	9419.14	1.24904	0.324175	3.85296	0.000116696	0.0065147	3633.38	7184.2	5918.94	14166.3	9033.31	16578.7
2	24134776	24134959	3wt_3mu_merged_p20_peak_61320a	1496	.	15.7261	149.614	147.106	43	3wt_3mu_merged_p20_peak_61320a	20785.9	1.25149	0.23794	5.25969	1.443e-07	2.13333e-05	12990.6	14356.6	9532.87	26932.8	34840.4	26062.3
2	24134776	24134959	3wt_3mu_merged_p20_peak_61320b	991	.	11.7373	99.1015	96.754	139	3wt_3mu_merged_p20_peak_61320b	20785.9	1.25149	0.23794	5.25969	1.443e-07	2.13333e-05	12990.6	14356.6	9532.87	26932.8	34840.4	26062.3
2	25125740	25125859	3wt_3mu_merged_p20_peak_61430	895	.	8.89506	89.5391	87.2313	39	3wt_3mu_merged_p20_peak_61430	11996.1	1.29814	0.308937	4.20196	2.64611e-05	0.00197367	4587.36	8007.27	8215.72	12223.7	16092.3	22850
2	2624911	2624986	3wt_3mu_merged_p20_peak_59088	998	.	10.694	99.8791	97.5293	42	3wt_3mu_merged_p20_peak_59088	7994.5	1.06968	0.264685	4.04132	5.31508e-05	0.00347033	6077.22	5197.08	4198.41	11371.6	10234.1	10888.5
2	265974	266403	3wt_3mu_merged_p20_peak_58819a	533	.	4.98786	53.3037	51.1897	83	3wt_3mu_merged_p20_peak_58819a	86625.2	0.885305	0.185206	4.78012	1.75192e-06	0.000197408	56773.7	57826.4	67956.7	97475.3	119434	120285
2	265974	266403	3wt_3mu_merged_p20_peak_58819b	2573	.	12.4056	257.345	254.619	248	3wt_3mu_merged_p20_peak_58819b	86625.2	0.885305	0.185206	4.78012	1.75192e-06	0.000197408	56773.7	57826.4	67956.7	97475.3	119434	120285
2	2670327	2670423	3wt_3mu_merged_p20_peak_59094	900	.	10.0919	90.099	87.7883	61	3wt_3mu_merged_p20_peak_59094	8237.46	1.00845	0.254217	3.9669	7.28148e-05	0.00448626	5123.24	4920.77	6371.71	10631.1	10850.8	11527.2
2	2671993	2672150	3wt_3mu_merged_p20_peak_59095	3543	.	24.7642	354.348	351.486	65	3wt_3mu_merged_p20_peak_59095	32672.4	0.754078	0.1957	3.85324	0.000116566	0.00651236	27270.9	22734.3	22959.6	36808.1	43365.3	42896.4
2	27013	27161	3wt_3mu_merged_p20_peak_58783	976	.	3.5617	97.6783	95.3372	92	3wt_3mu_merged_p20_peak_58783	47350.8	1.09029	0.225524	4.83445	1.33514e-06	0.000156443	23896.7	30829.7	36073.4	51081	74727.6	67496.2
2	2813150	2813302	3wt_3mu_merged_p20_peak_59103	5733	.	36.7533	573.304	570.215	77	3wt_3mu_merged_p20_peak_59103	36197.4	1.17363	0.183918	6.38123	1.75668e-10	5.01047e-08	21011.2	24339.3	21354.3	49371.7	51116.6	49991.5
2	2993631	2993749	3wt_3mu_merged_p20_peak_59124	1322	.	10.608	132.264	129.805	77	3wt_3mu_merged_p20_peak_59124	17356.6	1.15263	0.292468	3.94106	8.1123e-05	0.00485396	14833.8	10329.5	7137.3	28424	17633.9	25781.3
2	3056808	3056868	3wt_3mu_merged_p20_peak_59131	516	.	8.61267	51.6843	49.5825	30	3wt_3mu_merged_p20_peak_59131	4371.76	2.11626	0.517611	4.08851	4.34147e-05	0.00293292	2237.74	2316.35	353.984	5366.26	6804.73	9151.49
2	3057052	3057119	3wt_3mu_merged_p20_peak_59132	316	.	6.4469	31.6274	29.7037	25	3wt_3mu_merged_p20_peak_59132	3477.22	1.5041	0.379255	3.96592	7.31133e-05	0.00449929	1383.86	1452.13	2609.6	5761.89	4738.43	4917.41
2	3243160	3243384	3wt_3mu_merged_p20_peak_59156	977	.	13.0648	97.7853	95.4428	103	3wt_3mu_merged_p20_peak_59156	19964.2	1.07382	0.221508	4.84776	1.24866e-06	0.000147808	15281.4	11899.2	11393.3	30412.2	24660.4	26138.9
2	327595	327674	3wt_3mu_merged_p20_peak_58833	344	.	5.01269	34.4564	32.4995	25	3wt_3mu_merged_p20_peak_58833	6303.63	1.31192	0.305961	4.28786	1.804e-05	0.00143177	3833.59	4221.16	2798.94	9520.3	6961.6	10486.2
2	4141568	4141687	3wt_3mu_merged_p20_peak_59256	635	.	6.50393	63.5739	61.3944	51	3wt_3mu_merged_p20_peak_59256	10802.6	1.48208	0.281686	5.26145	1.42923e-07	2.11825e-05	4581.47	7848.53	4651.18	17468.3	16216.7	14049.7
2	4163217	4163300	3wt_3mu_merged_p20_peak_59261	313	.	5.21492	31.3695	29.4475	43	3wt_3mu_merged_p20_peak_59261	5589.43	1.29409	0.333291	3.88276	0.000103279	0.0059051	2826.61	4297.59	2584.91	6319.82	7372.69	10135
2	4163523	4163656	3wt_3mu_merged_p20_peak_59262	2387	.	18.4621	238.741	236.046	97	3wt_3mu_merged_p20_peak_59262	20857.9	1.13496	0.237644	4.77589	1.78913e-06	0.000200818	10046.3	16167.4	12941	28185.6	25601.6	32205.8
2	4499077	4499139	3wt_3mu_merged_p20_peak_59296	444	.	7.92119	44.4752	42.4273	24	3wt_3mu_merged_p20_peak_59296	3713.74	1.67603	0.406898	4.11904	3.80454e-05	0.00263696	2520.4	1111.14	1679.37	7704.5	4522.06	4744.98
2	48059393	48059486	3wt_3mu_merged_p20_peak_63852	762	.	11.1102	76.2934	74.0452	53	3wt_3mu_merged_p20_peak_63852	7847.57	2.51085	0.413105	6.07798	1.21706e-09	2.96014e-07	2267.18	2569.15	2189.76	4864.13	13360.6	21834.6
2	48088963	48089121	3wt_3mu_merged_p20_peak_63855	7611	.	54.7633	761.15	757.906	84	3wt_3mu_merged_p20_peak_63855	42158.8	0.790665	0.1977	3.99932	6.35243e-05	0.00399714	35014.7	28031.3	29611.2	46221.9	55633.3	58440.5
2	48280284	48280429	3wt_3mu_merged_p20_peak_63871	6006	.	31.0826	600.637	597.523	56	3wt_3mu_merged_p20_peak_63871	42311.1	1.01579	0.26409	3.84637	0.00011988	0.00666957	18261.1	25997.2	39761.4	54535	65148	50164
2	48463569	48463736	3wt_3mu_merged_p20_peak_63899	3724	.	29.063	372.496	369.612	100	3wt_3mu_merged_p20_peak_63899	29677.6	3.2669	0.219431	14.888	3.94249e-50	4.02171e-46	6565.99	5685.04	4494.77	46617.5	55124.8	59577.3
2	48465130	48465237	3wt_3mu_merged_p20_peak_63900	1690	.	17.3314	169.084	166.527	64	3wt_3mu_merged_p20_peak_63900	12878.6	6.81908	1.46414	4.6574	3.20224e-06	0.000325892	459.325	217.525	0	30224.5	25385.2	20985.2
2	4908908	4909107	3wt_3mu_merged_p20_peak_59346	5013	.	19.123	501.302	498.279	108	3wt_3mu_merged_p20_peak_59346	64015.3	1.00577	0.253439	3.96849	7.23287e-05	0.00445892	26717.4	55780.4	45194.7	99265.7	80574.9	76558.3
2	4971999	4972112	3wt_3mu_merged_p20_peak_59359	2016	.	11.9055	201.683	199.056	58	3wt_3mu_merged_p20_peak_59359	22336.2	0.791536	0.212281	3.72871	0.000192459	0.00967967	15970.4	14391.9	18720	30102.8	29874.8	24957.4
2	5030277	5030522	3wt_3mu_merged_p20_peak_59372a	694	.	10.4155	69.4604	67.2487	57	3wt_3mu_merged_p20_peak_59372a	22410.9	1.61885	0.271777	5.95654	2.57637e-09	5.72273e-07	7237.31	12986.8	12809.3	41489.6	26331.8	33610.8
2	5030277	5030522	3wt_3mu_merged_p20_peak_59372b	1279	.	15.6366	127.915	125.469	200	3wt_3mu_merged_p20_peak_59372b	22410.9	1.61885	0.271777	5.95654	2.57637e-09	5.72273e-07	7237.31	12986.8	12809.3	41489.6	26331.8	33610.8
2	5046239	5046348	3wt_3mu_merged_p20_peak_59375	389	.	6.67869	38.9474	36.9473	26	3wt_3mu_merged_p20_peak_59375	6180.57	1.38396	0.279148	4.95779	7.13003e-07	8.99899e-05	3745.26	3356.94	3169.39	9748.54	9514.72	7548.54
2	51096559	51096743	3wt_3mu_merged_p20_peak_64155	14174	.	42.8117	1417.41	1413.72	96	3wt_3mu_merged_p20_peak_64155	109040	0.71251	0.183218	3.88888	0.00010071	0.00579079	79003.8	84964.1	83976.5	145554	112938	147803
2	51109361	51109453	3wt_3mu_merged_p20_peak_64158	2266	.	23.2492	226.659	223.985	57	3wt_3mu_merged_p20_peak_64158	13631.5	1.33439	0.344014	3.87889	0.000104934	0.00598001	3627.49	7613.37	11994.3	18066.8	21469	19018.2
2	5119694	5120063	3wt_3mu_merged_p20_peak_59387a	1252	.	7.00006	125.236	122.798	133	3wt_3mu_merged_p20_peak_59387a	70009.8	0.831103	0.193675	4.29124	1.77681e-05	0.00141603	41233.2	57926.3	51994.5	93843.7	83852.9	91208.4
2	5119694	5120063	3wt_3mu_merged_p20_peak_59387b	1988	.	9.19219	198.888	196.266	247	3wt_3mu_merged_p20_peak_59387b	70009.8	0.831103	0.193675	4.29124	1.77681e-05	0.00141603	41233.2	57926.3	51994.5	93843.7	83852.9	91208.4
2	5119694	5120063	3wt_3mu_merged_p20_peak_59387c	620	.	4.79241	62.0533	59.884	328	3wt_3mu_merged_p20_peak_59387c	70009.8	0.831103	0.193675	4.29124	1.77681e-05	0.00141603	41233.2	57926.3	51994.5	93843.7	83852.9	91208.4
2	51383073	51383197	3wt_3mu_merged_p20_peak_64177	1096	.	14.0935	109.603	107.217	83	3wt_3mu_merged_p20_peak_64177	11907.5	14.2639	1.20427	11.8444	2.30009e-32	6.04352e-29	0	0	0	22611.3	22567	26266.6
2	52561393	52561457	3wt_3mu_merged_p20_peak_64284	920	.	12.5505	92.0023	89.6832	35	3wt_3mu_merged_p20_peak_64284	5326.54	1.89101	0.460876	4.10307	4.07699e-05	0.00279012	3651.04	1904.81	1226.6	13983.7	6799.32	4393.74
2	5294149	5294361	3wt_3mu_merged_p20_peak_59424	1712	.	14.6287	171.211	168.65	69	3wt_3mu_merged_p20_peak_59424	26162.8	1.1205	0.209296	5.35365	8.61968e-08	1.34303e-05	17430.8	17454.9	14562.7	41210.7	31097.3	35220.1
2	53312263	53312536	3wt_3mu_merged_p20_peak_64382	2290	.	15.1946	229.099	226.421	157	3wt_3mu_merged_p20_peak_64382	44222.3	0.955319	0.223781	4.26898	1.96367e-05	0.00153947	21570.6	35415.4	33299.2	57608.7	63054.6	54385.3
2	53719901	53720058	3wt_3mu_merged_p20_peak_64429	9204	.	60.0173	920.499	917.139	83	3wt_3mu_merged_p20_peak_64429	48084.5	0.893241	0.239027	3.73698	0.000186243	0.00945755	24285.3	41929.4	34756.3	50746.2	73981.2	62808.7
2	53737946	53738249	3wt_3mu_merged_p20_peak_64431a	646	.	7.81707	64.6321	62.4464	49	3wt_3mu_merged_p20_peak_64431a	29483.6	0.950149	0.24806	3.83031	0.00012798	0.00702557	16712.4	23651.4	19971.3	37619.6	50413.4	28533.7
2	53737946	53738249	3wt_3mu_merged_p20_peak_64431b	857	.	9.26746	85.7106	83.419	154	3wt_3mu_merged_p20_peak_64431b	29483.6	0.950149	0.24806	3.83031	0.00012798	0.00702557	16712.4	23651.4	19971.3	37619.6	50413.4	28533.7
2	53869216	53869360	3wt_3mu_merged_p20_peak_64461	389	.	5.92978	38.9583	36.9581	39	3wt_3mu_merged_p20_peak_64461	9448.24	1.1936	0.291626	4.09292	4.25971e-05	0.0028946	5582.56	5050.11	6618.67	16251	14361.3	8825.79
2	54000850	54001107	3wt_3mu_merged_p20_peak_64477a	1177	.	9.3545	117.774	115.36	37	3wt_3mu_merged_p20_peak_64477a	44527.8	1.27768	0.280882	4.54882	5.39475e-06	0.000507616	14610.1	28290	35126.7	54296.7	75777	59066.4
2	54000850	54001107	3wt_3mu_merged_p20_peak_64477b	1877	.	12.6302	187.748	185.15	134	3wt_3mu_merged_p20_peak_64477b	44527.8	1.27768	0.280882	4.54882	5.39475e-06	0.000507616	14610.1	28290	35126.7	54296.7	75777	59066.4
2	58352115	58352241	3wt_3mu_merged_p20_peak_64967	1150	.	9.38412	115.1	112.695	38	3wt_3mu_merged_p20_peak_64967	17611.1	1.32926	0.255695	5.19861	2.00788e-07	2.8578e-05	7814.41	9606.37	12669.3	20780.3	30464.4	24331.6
2	59209803	59209863	3wt_3mu_merged_p20_peak_65103	1474	.	13.1182	147.447	144.945	25	3wt_3mu_merged_p20_peak_65103	8468.25	1.18809	0.308514	3.85099	0.00011764	0.0065555	3156.39	6549.26	5795.46	12736	11754.1	10818.3
2	6249363	6249475	3wt_3mu_merged_p20_peak_59533	2204	.	14.3306	220.442	217.779	65	3wt_3mu_merged_p20_peak_59533	17067	1.23697	0.295273	4.18923	2.79904e-05	0.0020664	9586.93	8836.21	12084.8	28763.8	13696	29434.2
2	6372052	6372167	3wt_3mu_merged_p20_peak_59545	2598	.	24.3987	259.862	257.132	71	3wt_3mu_merged_p20_peak_59545	17495.7	0.970133	0.245563	3.95064	7.79415e-05	0.0047046	12484.2	10770.4	12224.8	30204.3	20706.3	18584
2	6457248	6457446	3wt_3mu_merged_p20_peak_59547	20773	.	68.7895	2077.39	2073.29	107	3wt_3mu_merged_p20_peak_59547	133194	0.79665	0.186989	4.26042	2.04045e-05	0.00158747	107458	99032.6	85483	195219	157872	154100
2	7253898	7253961	3wt_3mu_merged_p20_peak_59633	1205	.	15.0194	120.51	118.086	38	3wt_3mu_merged_p20_peak_59633	6464.02	1.97586	0.396837	4.97902	6.39073e-07	8.14294e-05	2055.18	4062.42	1736.99	7562.48	7637.74	15729.3
2	7293794	7293890	3wt_3mu_merged_p20_peak_59634	966	.	12.9619	96.6218	94.2839	46	3wt_3mu_merged_p20_peak_59634	8084.12	13.7052	1.49113	9.19116	3.88615e-20	3.06327e-17	0	0	0	16748	5739.12	26017.6
2	7349634	7349757	3wt_3mu_merged_p20_peak_59636	4715	.	39.6059	471.555	468.562	65	3wt_3mu_merged_p20_peak_59636	25026.6	0.936574	0.21252	4.40698	1.0482e-05	0.000899874	15481.6	19112.8	16933.6	28043.6	32698.4	37889.6
2	7376275	7376557	3wt_3mu_merged_p20_peak_59641a	444	.	7.92119	44.4752	42.4273	55	3wt_3mu_merged_p20_peak_59641a	22256.7	0.952095	0.204154	4.66361	3.10713e-06	0.00031733	13720.9	15273.8	16513.8	26780.6	32027.7	29223.5
2	7376275	7376557	3wt_3mu_merged_p20_peak_59641b	840	.	11.8303	84.0558	81.771	182	3wt_3mu_merged_p20_peak_59641b	22256.7	0.952095	0.204154	4.66361	3.10713e-06	0.00031733	13720.9	15273.8	16513.8	26780.6	32027.7	29223.5
2	7473223	7473404	3wt_3mu_merged_p20_peak_59650	2637	.	18.8661	263.781	261.044	113	3wt_3mu_merged_p20_peak_59650	30349.3	0.860106	0.204253	4.21097	2.54271e-05	0.00190969	20669.6	23604.4	20407.6	35342.3	45983.3	36088.7
2	7727360	7727419	3wt_3mu_merged_p20_peak_59667	644	.	9.97864	64.4963	62.3112	25	3wt_3mu_merged_p20_peak_59667	4242.94	12.775	1.2563	10.1688	2.73346e-24	3.18138e-21	0	0	0	4189.54	8757.44	12510.7
2	7783976	7784170	3wt_3mu_merged_p20_peak_59669	4303	.	31.2816	430.315	427.366	69	3wt_3mu_merged_p20_peak_59669	41260.2	0.927505	0.196292	4.72513	2.29969e-06	0.00024709	26988.3	33328.3	24984.7	52810.5	57759.1	51690.3
2	7874002	7874179	3wt_3mu_merged_p20_peak_59681	1409	.	11.8487	140.914	138.43	111	3wt_3mu_merged_p20_peak_59681	20143.8	1.14715	0.254093	4.51467	6.34143e-06	0.00058651	16712.4	9847.41	11031.1	25309.7	25309.5	32652.9
2	814824	815013	3wt_3mu_merged_p20_peak_58896	3360	.	30.8618	336.094	333.255	133	3wt_3mu_merged_p20_peak_58896	26261.6	1.56853	0.229725	6.82787	8.61843e-12	3.06202e-09	9875.48	15444.3	14414.6	43832.9	35716.7	38285.5
2	82917	83356	3wt_3mu_merged_p20_peak_58791a	1497	.	6.91075	149.751	147.243	61	3wt_3mu_merged_p20_peak_58791a	103563	0.825457	0.17344	4.75933	1.94236e-06	0.000215231	75335.1	75857.4	72961.8	125341	148476	123408
2	82917	83356	3wt_3mu_merged_p20_peak_58791b	2960	.	10.3562	296.049	293.264	270	3wt_3mu_merged_p20_peak_58791b	103563	0.825457	0.17344	4.75933	1.94236e-06	0.000215231	75335.1	75857.4	72961.8	125341	148476	123408
2	82917	83356	3wt_3mu_merged_p20_peak_58791c	422	.	3.62793	42.2301	40.2027	412	3wt_3mu_merged_p20_peak_58791c	103563	0.825457	0.17344	4.75933	1.94236e-06	0.000215231	75335.1	75857.4	72961.8	125341	148476	123408
2	8333979	8334092	3wt_3mu_merged_p20_peak_59749	558	.	8.01348	55.8641	53.734	38	3wt_3mu_merged_p20_peak_59749	8420.79	1.46844	0.269019	5.45849	4.802e-08	8.05362e-06	5453.01	4191.76	3762.11	11762.2	14058.4	11297.3
2	83876	83943	3wt_3mu_merged_p20_peak_58792	588	.	4.26962	58.8544	56.7047	31	3wt_3mu_merged_p20_peak_58792	11357.3	0.91095	0.227946	3.99635	6.43278e-05	0.00403453	7561.19	8071.94	8026.38	13791	16470.9	14222.2
2	8860624	8860753	3wt_3mu_merged_p20_peak_59799	1462	.	14.5218	146.285	143.787	51	3wt_3mu_merged_p20_peak_59799	15574.1	1.06375	0.264455	4.02243	5.75996e-05	0.00370226	7478.75	9194.84	13574.9	19324.6	23946.4	19925.1
2	8880754	8880983	3wt_3mu_merged_p20_peak_59803a	444	.	5.75849	44.4131	42.3683	43	3wt_3mu_merged_p20_peak_59803a	17539.8	1.60732	0.26987	5.9559	2.58651e-09	5.7285e-07	11583.2	7378.21	7038.52	26902.3	31989.8	20346.6
2	8880754	8880983	3wt_3mu_merged_p20_peak_59803b	208	.	3.87822	20.8759	19.0943	193	3wt_3mu_merged_p20_peak_59803b	17539.8	1.60732	0.26987	5.9559	2.58651e-09	5.7285e-07	11583.2	7378.21	7038.52	26902.3	31989.8	20346.6
2	89872	90103	3wt_3mu_merged_p20_peak_58795	6279	.	16.4602	627.937	624.799	76	3wt_3mu_merged_p20_peak_58795	94629.7	0.884992	0.196632	4.50075	6.77132e-06	0.000618029	57486.3	63205.7	78765.5	109288	139156	119876
2	9154618	9154680	3wt_3mu_merged_p20_peak_59830	267	.	5.86373	26.713	24.8442	31	3wt_3mu_merged_p20_peak_59830	3357.16	1.69062	0.358374	4.71747	2.388e-06	0.000255156	1165.98	1822.51	1778.15	5680.73	4695.16	5000.43
2	935888	935993	3wt_3mu_merged_p20_peak_58908	840	.	11.8303	84.0558	81.771	36	3wt_3mu_merged_p20_peak_58908	9186.9	1.60947	0.28674	5.61299	1.98859e-08	3.69223e-06	3686.38	4368.14	5556.72	10200	15600	15710.2
2	9442346	9442513	3wt_3mu_merged_p20_peak_59853	1527	.	17.568	152.754	150.238	137	3wt_3mu_merged_p20_peak_59853	14475.2	1.63878	0.275767	5.94263	2.80484e-09	6.17265e-07	8126.51	6067.18	6915.03	19943.4	15892.1	29906.8
2	9503088	9503148	3wt_3mu_merged_p20_peak_59859	370	.	7.09821	37.0648	35.0819	25	3wt_3mu_merged_p20_peak_59859	3411.46	10.048	0.942879	10.6568	1.62133e-26	2.32368e-23	17.6663	0	0	7755.22	3959.51	8736.38
2	9509858	9509954	3wt_3mu_merged_p20_peak_59860	1905	.	20.5745	190.554	187.95	65	3wt_3mu_merged_p20_peak_59860	11535.3	2.13594	0.288517	7.40314	1.33002e-13	6.03786e-11	2867.83	5867.29	4091.39	17590	17861.1	20934.1
2	9527015	9527266	3wt_3mu_merged_p20_peak_59861	13799	.	60.7933	1379.98	1376.31	138	3wt_3mu_merged_p20_peak_59861	111251	0.858975	0.180733	4.75274	2.00682e-06	0.000221381	71460.3	84429.1	81342.2	125240	155605	149432
2	9607600	9607917	3wt_3mu_merged_p20_peak_59874a	761	.	10.6473	76.1554	73.9092	54	3wt_3mu_merged_p20_peak_59874a	43874.2	2.12783	0.209589	10.1524	3.23278e-24	3.68827e-21	15145.9	14821.1	19057.5	61509.2	67755.2	84956.2
2	9607600	9607917	3wt_3mu_merged_p20_peak_59874b	4221	.	34.7412	422.191	419.251	249	3wt_3mu_merged_p20_peak_59874b	43874.2	2.12783	0.209589	10.1524	3.23278e-24	3.68827e-21	15145.9	14821.1	19057.5	61509.2	67755.2	84956.2
2	9696166	9696492	3wt_3mu_merged_p20_peak_59881	19472	.	43.9366	1947.22	1943.2	175	3wt_3mu_merged_p20_peak_59881	273719	1.04267	0.182779	5.70453	1.16665e-08	2.31217e-06	157749	175713	203244	328732	365292	411587
2	9841520	9841691	3wt_3mu_merged_p20_peak_59895	2437	.	24.4837	243.77	241.066	116	3wt_3mu_merged_p20_peak_59895	23033.6	0.968367	0.259608	3.73011	0.000191393	0.00964761	11936.6	19724.2	15081.4	24351.1	39162.4	27946.2
2	9927176	9927231	3wt_3mu_merged_p20_peak_59903	1254	.	15.4309	125.435	122.996	30	3wt_3mu_merged_p20_peak_59903	6341.4	1.85131	0.376049	4.92305	8.52044e-07	0.000104867	4546.14	1934.21	1769.92	8759.49	11689.2	9349.46
3	10019246	10019752	3wt_3mu_merged_p20_peak_94120a	2483	.	21.4219	248.324	245.613	102	3wt_3mu_merged_p20_peak_94120a	61849.8	1.04949	0.188853	5.5572	2.74137e-08	4.83127e-06	45508.5	40054	35316.1	75051.6	88807.7	86361.2
3	10019246	10019752	3wt_3mu_merged_p20_peak_94120b	1143	.	12.5576	114.391	111.989	280	3wt_3mu_merged_p20_peak_94120b	61849.8	1.04949	0.188853	5.5572	2.74137e-08	4.83127e-06	45508.5	40054	35316.1	75051.6	88807.7	86361.2
3	10751516	10751654	3wt_3mu_merged_p20_peak_94193	4963	.	41.149	496.362	493.345	56	3wt_3mu_merged_p20_peak_94193	29747.2	1.54605	0.240958	6.41626	1.39664e-10	4.05017e-08	15452.2	19101	10965.3	50731	38405.1	43828.8
3	10779845	10779920	3wt_3mu_merged_p20_peak_94194	840	.	11.8303	84.0558	81.771	36	3wt_3mu_merged_p20_peak_94194	6232.6	13.3301	1.47132	9.05994	1.30517e-19	1.00149e-16	0	0	0	23012	7626.92	6756.65
3	10941091	10941184	3wt_3mu_merged_p20_peak_94198	1430	.	16.8711	143.03	140.539	51	3wt_3mu_merged_p20_peak_94198	9698.93	1.36747	0.338335	4.04177	5.305e-05	0.00346506	6648.43	6396.41	3202.32	14186.6	18391.2	9368.62
3	11573161	11573301	3wt_3mu_merged_p20_peak_94229	4284	.	34.6456	428.422	425.475	82	3wt_3mu_merged_p20_peak_94229	28265.8	1.13119	0.238692	4.73913	2.14634e-06	0.000232486	19721.5	20106.4	13319.7	31203.5	45783.2	39460.6
3	12060123	12060191	3wt_3mu_merged_p20_peak_94297	483	.	8.33268	48.3169	46.2388	38	3wt_3mu_merged_p20_peak_94297	4206.11	1.64297	0.408851	4.0185	5.85695e-05	0.00375485	1548.75	3168.81	1399.47	7450.89	7453.83	4214.92
3	12490214	12490309	3wt_3mu_merged_p20_peak_94368	302	.	5.91785	30.2272	28.3167	36	3wt_3mu_merged_p20_peak_94368	5397.68	1.37524	0.344233	3.99509	6.46708e-05	0.00405164	2738.28	2351.62	3926.75	5599.58	10163.8	7606.02
3	12839597	12839709	3wt_3mu_merged_p20_peak_94391	829	.	11.7275	82.9354	80.6557	33	3wt_3mu_merged_p20_peak_94391	9587.79	1.88824	0.326832	5.77741	7.58579e-09	1.55313e-06	6177.33	2416.29	3638.62	14658.3	14593.9	16042.2
3	12841026	12841110	3wt_3mu_merged_p20_peak_94392	1481	.	17.2826	148.154	145.65	36	3wt_3mu_merged_p20_peak_94392	9517.87	1.80849	0.300895	6.01037	1.85097e-09	4.26721e-07	5947.67	3509.79	3218.78	12908.5	17677.2	13845.4
3	12851994	12852090	3wt_3mu_merged_p20_peak_94393	1217	.	15.1223	121.737	119.309	35	3wt_3mu_merged_p20_peak_94393	9868.94	1.11925	0.248311	4.50746	6.56098e-06	0.000603276	6454.1	6831.46	5375.62	12741.1	15454	12357.4
3	13298783	13298862	3wt_3mu_merged_p20_peak_94460	542	.	8.94991	54.2377	52.1171	38	3wt_3mu_merged_p20_peak_94460	4840.05	1.78176	0.346462	5.14273	2.70781e-07	3.74464e-05	2208.29	2863.1	1465.33	8536.32	7881.15	6086.09
3	13611869	13611950	3wt_3mu_merged_p20_peak_94490	548	.	7.92321	54.8791	52.7556	46	3wt_3mu_merged_p20_peak_94490	6385.98	1.46287	0.349772	4.18236	2.885e-05	0.00211188	2331.96	3280.51	4593.56	10671.7	6166.45	11271.7
3	13907436	13907581	3wt_3mu_merged_p20_peak_94507	1341	.	16.151	134.165	131.7	53	3wt_3mu_merged_p20_peak_94507	13791.5	1.267	0.255745	4.95417	7.26384e-07	9.11481e-05	6760.32	7225.35	10314.9	22413.5	16525	19510
3	14094087	14094166	3wt_3mu_merged_p20_peak_94534	375	.	3.14453	37.5438	35.5582	31	3wt_3mu_merged_p20_peak_94534	12636.5	1.24489	0.234516	5.30832	1.1064e-07	1.68897e-05	6901.65	8530.5	7063.21	18822.5	15329.6	19171.5
3	14144107	14144175	3wt_3mu_merged_p20_peak_94543	522	.	8.74417	52.2437	50.1369	35	3wt_3mu_merged_p20_peak_94543	4519.36	1.60243	0.398848	4.01765	5.87807e-05	0.00376283	3050.39	2351.62	1308.92	7613.2	4311.1	8480.93
3	14156926	14157135	3wt_3mu_merged_p20_peak_94545	6879	.	51.661	687.903	684.715	111	3wt_3mu_merged_p20_peak_94545	50053	16.3356	1.19534	13.6661	1.61828e-42	1.16931e-38	0	0	0	111322	98560.4	90435.6
3	14191286	14191378	3wt_3mu_merged_p20_peak_94547	1136	.	14.3326	113.655	111.254	40	3wt_3mu_merged_p20_peak_94547	9073.28	1.99721	0.30116	6.63173	3.31773e-11	1.07341e-08	2873.72	5144.17	2881.26	16737.9	12835.9	13966.7
3	14191868	14191993	3wt_3mu_merged_p20_peak_94548	584	.	9.27267	58.4848	56.3367	33	3wt_3mu_merged_p20_peak_94548	6864.92	4.80845	0.414662	11.5961	4.31491e-31	9.977e-28	388.659	640.817	386.913	22586	10066.5	7120.66
3	14195470	14195568	3wt_3mu_merged_p20_peak_94550	1932	.	20.7803	193.282	190.672	48	3wt_3mu_merged_p20_peak_94550	13368.6	1.79806	0.374703	4.79862	1.59762e-06	0.000182392	2390.84	9818.02	5704.9	20871.6	23199.9	18226.3
3	14251304	14251469	3wt_3mu_merged_p20_peak_94551	2984	.	22.5593	298.482	295.693	53	3wt_3mu_merged_p20_peak_94551	26645	2.05159	0.290223	7.06902	1.56037e-12	6.26374e-10	5600.23	12798.7	12677.6	50457.1	39297.6	39039.1
3	14255436	14255489	3wt_3mu_merged_p20_peak_94552	300	.	5.38425	30.0443	28.1392	25	3wt_3mu_merged_p20_peak_94552	3182.55	12.3605	1.24691	9.91294	3.65731e-23	3.8207e-20	0	0	0	6517.63	8043.43	4534.23
3	14255823	14256186	3wt_3mu_merged_p20_peak_94553a	3376	.	25.2413	337.669	334.828	68	3wt_3mu_merged_p20_peak_94553a	45490.1	8.56577	0.28743	29.8013	3.76068e-195	1.6304e-190	200.218	199.888	329.287	122841	78789.9	70580.8
3	14255823	14256186	3wt_3mu_merged_p20_peak_94553b	2221	.	18.8465	222.193	219.527	139	3wt_3mu_merged_p20_peak_94553b	45490.1	8.56577	0.28743	29.8013	3.76068e-195	1.6304e-190	200.218	199.888	329.287	122841	78789.9	70580.8
3	14255823	14256186	3wt_3mu_merged_p20_peak_94553c	425	.	6.59125	42.5944	40.5621	329	3wt_3mu_merged_p20_peak_94553c	45490.1	8.56577	0.28743	29.8013	3.76068e-195	1.6304e-190	200.218	199.888	329.287	122841	78789.9	70580.8
3	14322785	14323033	3wt_3mu_merged_p20_peak_94561	6716	.	34.6047	671.619	668.445	89	3wt_3mu_merged_p20_peak_94561	72336.3	1.02043	0.272973	3.73822	0.000185328	0.00943253	28819.7	55233.7	59263.5	74331.4	125417	90952.9
3	14427772	14427837	3wt_3mu_merged_p20_peak_94578	1144	.	14.505	114.42	112.017	30	3wt_3mu_merged_p20_peak_94578	5758.83	2.0554	0.429678	4.78359	1.7219e-06	0.000194664	4016.15	1034.71	1646.44	11331	7864.93	8659.75
3	16119464	16119555	3wt_3mu_merged_p20_peak_94820	473	.	8.2298	47.3483	45.2776	44	3wt_3mu_merged_p20_peak_94820	5729.07	1.37566	0.329763	4.17167	3.02374e-05	0.00219216	3692.26	3633.25	2230.92	8105.19	10288.2	6424.56
3	1932617	1932681	3wt_3mu_merged_p20_peak_93465	502	.	8.53842	50.2699	48.1773	37	3wt_3mu_merged_p20_peak_93465	4417.71	1.61072	0.369798	4.35567	1.32663e-05	0.00109971	2396.73	1575.59	2568.44	4255.48	8167.84	7542.16
3	21277612	21277719	3wt_3mu_merged_p20_peak_95445	2208	.	12.5733	220.856	218.193	39	3wt_3mu_merged_p20_peak_95445	20839.7	0.998514	0.232052	4.30297	1.68526e-05	0.00135427	11618.6	13468.9	16629	25177.8	33071.6	25072.4
3	220168	220290	3wt_3mu_merged_p20_peak_93290	697	.	10.493	69.7953	67.5807	29	3wt_3mu_merged_p20_peak_93290	11486.4	1.33147	0.328159	4.05739	4.96241e-05	0.00327334	9922.59	5314.66	4354.82	18503	18932.1	11891.2
3	2538284	2538365	3wt_3mu_merged_p20_peak_93478	840	.	11.8303	84.0558	81.771	42	3wt_3mu_merged_p20_peak_93478	6503.62	13.3914	1.67739	7.98349	1.42249e-15	7.83117e-13	0	0	0	17945	18266.8	2809.95
3	33879153	33879292	3wt_3mu_merged_p20_peak_97044	1404	.	16.6654	140.483	138	75	3wt_3mu_merged_p20_peak_97044	13444.4	3.25914	0.272012	11.9816	4.43532e-33	1.32613e-29	1990.41	3215.84	2420.26	26410.3	18542.6	28086.7
3	3622970	3623041	3wt_3mu_merged_p20_peak_93522	1096	.	14.0935	109.603	107.217	31	3wt_3mu_merged_p20_peak_93522	7097.87	2.96639	0.396887	7.47414	7.77107e-14	3.63242e-11	1006.98	2169.37	1654.67	6208.23	18066.6	13481.4
3	41854558	41854619	3wt_3mu_merged_p20_peak_98031	309	.	6.3781	30.9063	28.9874	35	3wt_3mu_merged_p20_peak_98031	3344.34	2.14836	0.510574	4.20773	2.57946e-05	0.00193143	830.318	2239.92	617.414	2941.81	5798.63	7637.95
3	4618736	4618818	3wt_3mu_merged_p20_peak_93576	3131	.	29.3187	313.199	310.39	38	3wt_3mu_merged_p20_peak_93576	16881.2	1.39427	0.315973	4.41263	1.02121e-05	0.000880391	12961.2	9147.8	5795.46	16327	31708.5	25347
3	4663928	4663993	3wt_3mu_merged_p20_peak_93583	1050	.	5.43194	105.099	102.729	25	3wt_3mu_merged_p20_peak_93583	13426.5	1.16805	0.290009	4.02765	5.63375e-05	0.00364546	9380.82	9894.44	5523.79	14359.1	17861.1	23539.7
3	48221458	48221611	3wt_3mu_merged_p20_peak_98721	5184	.	37.3817	518.491	515.451	90	3wt_3mu_merged_p20_peak_98721	35182.8	0.804816	0.215199	3.73986	0.000184119	0.00939371	27129.6	26585.1	23132.4	50005.7	49796.8	34447.4
3	49570127	49570179	3wt_3mu_merged_p20_peak_98836	323	.	4.75414	32.3684	30.436	25	3wt_3mu_merged_p20_peak_98836	3885.42	1.42003	0.376426	3.77241	0.000161678	0.00849621	2131.74	2169.37	2041.58	8262.42	4933.16	3774.27
3	50136207	50136294	3wt_3mu_merged_p20_peak_98861	655	.	10.0815	65.5474	63.3563	36	3wt_3mu_merged_p20_peak_98861	6704.25	2.03922	0.311019	6.55658	5.50552e-11	1.71101e-08	2891.39	2933.65	2041.58	12406.3	12257.2	7695.43
3	50286460	50286980	3wt_3mu_merged_p20_peak_98878a	3045	.	18.3467	304.514	301.717	91	3wt_3mu_merged_p20_peak_98878a	100725	2.20751	0.19867	11.1115	1.10352e-28	2.01439e-25	30127	37966.9	39473.3	180835	179276	136672
3	50286460	50286980	3wt_3mu_merged_p20_peak_98878b	2854	.	17.566	285.458	282.689	346	3wt_3mu_merged_p20_peak_98878b	100725	2.20751	0.19867	11.1115	1.10352e-28	2.01439e-25	30127	37966.9	39473.3	180835	179276	136672
3	51130021	51130183	3wt_3mu_merged_p20_peak_98944	493	.	6.05243	49.3289	47.2433	62	3wt_3mu_merged_p20_peak_98944	15467.5	0.888788	0.22682	3.91847	8.9114e-05	0.00524925	12325.2	8836.21	11385.1	19091.3	20814.5	20353
3	51633283	51633486	3wt_3mu_merged_p20_peak_99003a	572	.	9.25853	57.2657	55.1251	49	3wt_3mu_merged_p20_peak_99003a	15819.9	0.857764	0.224399	3.82249	0.00013211	0.00722485	10381.9	10247.2	13130.3	18802.2	22567	19791
3	51633283	51633486	3wt_3mu_merged_p20_peak_99003b	624	.	9.77289	62.4075	60.2348	138	3wt_3mu_merged_p20_peak_99003b	15819.9	0.857764	0.224399	3.82249	0.00013211	0.00722485	10381.9	10247.2	13130.3	18802.2	22567	19791
3	51714939	51715109	3wt_3mu_merged_p20_peak_99011	840	.	11.8303	84.0558	81.771	51	3wt_3mu_merged_p20_peak_99011	14003.6	1.09417	0.288388	3.79409	0.000148187	0.00794618	8950.94	6778.55	11080.5	19279	24757.8	13174.8
3	51819530	51819592	3wt_3mu_merged_p20_peak_99033	204	.	5.04075	20.4014	18.6238	8	3wt_3mu_merged_p20_peak_99033	2619.13	2.21016	0.502878	4.39503	1.10756e-05	0.000945689	1460.42	540.873	790.29	4788.05	5944.67	2190.48
3	51881415	51881492	3wt_3mu_merged_p20_peak_99048	1010	.	12.5364	101.012	98.6579	38	3wt_3mu_merged_p20_peak_99048	7681.18	1.76584	0.416863	4.23603	2.27503e-05	0.00174724	1319.09	4744.39	4412.45	7567.55	14804.9	13238.7
3	51907880	51907959	3wt_3mu_merged_p20_peak_99055	580	.	6.42295	58.0562	55.9121	35	3wt_3mu_merged_p20_peak_99055	7729.76	2.4469	0.332114	7.36767	1.7364e-13	7.72101e-11	3603.93	2051.79	1522.95	11838.2	13241.6	14120
3	52702652	52702798	3wt_3mu_merged_p20_peak_99102	10751	.	48.9422	1075.19	1071.72	82	3wt_3mu_merged_p20_peak_99102	63620.9	0.913907	0.237533	3.84749	0.000119336	0.00664783	50472.7	38166.8	43712.9	59105	109584	80683.8
3	5281499	5281592	3wt_3mu_merged_p20_peak_93643	1044	.	6.23486	104.485	102.117	31	3wt_3mu_merged_p20_peak_93643	15414.8	3.54831	0.330202	10.7459	6.19666e-27	9.50973e-24	3126.94	2957.16	1185.43	24452.5	36511.9	24255
3	52958205	52958261	3wt_3mu_merged_p20_peak_99127	379	.	6.55617	37.9127	35.9249	25	3wt_3mu_merged_p20_peak_99127	3526.08	3.00574	0.486469	6.17869	6.46352e-10	1.66302e-07	712.542	329.227	1308.92	6243.74	8660.07	3902
3	56030887	56030957	3wt_3mu_merged_p20_peak_99508	1634	.	8.55582	163.497	160.955	37	3wt_3mu_merged_p20_peak_99508	14487.9	0.96379	0.228255	4.22242	2.41691e-05	0.00182946	8256.07	10106.1	11105.2	17371.9	20035.5	20052.8
3	56305894	56306020	3wt_3mu_merged_p20_peak_99555a	251	.	4.77798	25.103	23.2557	18	3wt_3mu_merged_p20_peak_99555a	7354.71	1.4987	0.373824	4.00911	6.09475e-05	0.00387475	4540.25	3151.17	3844.43	14911.9	12673.7	5006.82
3	56305894	56306020	3wt_3mu_merged_p20_peak_99555b	336	.	5.78773	33.6884	31.74	98	3wt_3mu_merged_p20_peak_99555b	7354.71	1.4987	0.373824	4.00911	6.09475e-05	0.00387475	4540.25	3151.17	3844.43	14911.9	12673.7	5006.82
3	5703215	5703421	3wt_3mu_merged_p20_peak_93672	4631	.	31.2011	463.118	460.134	158	3wt_3mu_merged_p20_peak_93672	48888.5	0.688049	0.173947	3.9555	7.63737e-05	0.00465206	35621.2	37996.3	38724.2	59693.4	59809.1	61486.8
3	57053454	57053608	3wt_3mu_merged_p20_peak_99615a	471	.	7.94555	47.1801	45.1128	27	3wt_3mu_merged_p20_peak_99615a	9003.28	0.941312	0.244916	3.8434	0.00012134	0.00673815	6459.99	6143.61	5894.24	12898.3	12284.2	10339.3
3	57053454	57053608	3wt_3mu_merged_p20_peak_99615b	330	.	6.16861	33.0375	31.097	109	3wt_3mu_merged_p20_peak_99615b	9003.28	0.941312	0.244916	3.8434	0.00012134	0.00673815	6459.99	6143.61	5894.24	12898.3	12284.2	10339.3
3	57205955	57206110	3wt_3mu_merged_p20_peak_99649	6179	.	33.8145	617.938	614.809	53	3wt_3mu_merged_p20_peak_99649	47797.6	1.1567	0.285858	4.04642	5.20059e-05	0.0034083	15770.1	35656.4	37382.3	52901.8	73121.1	71953.8
3	5741355	5741486	3wt_3mu_merged_p20_peak_93678	2519	.	21.5811	251.951	249.234	86	3wt_3mu_merged_p20_peak_93678	19173.7	1.41189	0.262476	5.37911	7.48536e-08	1.19419e-05	8485.73	11687.6	11253.4	19461.6	35332.7	28821.1
3	57581973	57582030	3wt_3mu_merged_p20_peak_99687	656	.	6.76036	65.6049	63.4136	26	3wt_3mu_merged_p20_peak_99687	6252.54	1.13887	0.302434	3.76567	0.000166103	0.00868403	5076.13	3456.88	3177.62	8029.11	7940.66	9834.82
3	58228050	58228125	3wt_3mu_merged_p20_peak_99744	785	.	4.4223	78.521	76.262	41	3wt_3mu_merged_p20_peak_99744	15303.8	1.13054	0.256214	4.41249	1.0219e-05	0.000880391	8079.4	9553.46	11162.8	17108.1	27035	18884.1
3	58286530	58286730	3wt_3mu_merged_p20_peak_99757	1496	.	16.5365	149.619	147.111	56	3wt_3mu_merged_p20_peak_99757	19286.5	0.962358	0.257513	3.73712	0.000186139	0.00945505	11059.1	11076.1	17122.9	24964.8	30913.4	20582.9
3	58300177	58300304	3wt_3mu_merged_p20_peak_99758	932	.	10.6494	93.2753	90.9511	51	3wt_3mu_merged_p20_peak_99758	13024.1	1.07379	0.227665	4.71654	2.39884e-06	0.000255841	8992.16	7689.8	8487.38	18142.8	19435.1	15397.2
3	58690178	58690279	3wt_3mu_merged_p20_peak_99814	1304	.	15.8424	130.407	127.953	37	3wt_3mu_merged_p20_peak_99814	13224.1	1.66817	0.328073	5.08475	3.68103e-07	4.95228e-05	7985.18	5085.38	5918.94	13704.8	31578.7	15071.5
3	58712335	58712444	3wt_3mu_merged_p20_peak_99815	655	.	10.0815	65.5474	63.3563	33	3wt_3mu_merged_p20_peak_99815	7868.35	2.50254	0.281743	8.88235	6.54614e-19	4.69093e-16	2885.5	1751.96	2444.96	12360.7	13825.8	13941.2
3	5916910	5917080	3wt_3mu_merged_p20_peak_93701a	303	.	4.86043	30.3415	28.4303	18	3wt_3mu_merged_p20_peak_93701a	14459.7	1.17048	0.241696	4.8428	1.2802e-06	0.000150923	9021.61	9676.92	7985.22	16646.6	24741.5	18686.2
3	5916910	5917080	3wt_3mu_merged_p20_peak_93701b	818	.	8.50822	81.8695	79.5948	121	3wt_3mu_merged_p20_peak_93701b	14459.7	1.17048	0.241696	4.8428	1.2802e-06	0.000150923	9021.61	9676.92	7985.22	16646.6	24741.5	18686.2
3	6036549	6036769	3wt_3mu_merged_p20_peak_93725	12153	.	37.2139	1215.37	1211.81	130	3wt_3mu_merged_p20_peak_93725	110859	0.846824	0.215392	3.93155	8.43998e-05	0.0050193	101841	69884.3	65948	160176	145415	121888
3	633385	633527	3wt_3mu_merged_p20_peak_93329	4567	.	38.6801	456.791	453.814	84	3wt_3mu_merged_p20_peak_93329	25939.9	2.12416	0.337212	6.29918	2.99222e-10	8.26272e-08	6772.09	13210.2	9055.4	20136.2	57732	48733.4
3	63848	63962	3wt_3mu_merged_p20_peak_93274	1404	.	16.6654	140.483	138	54	3wt_3mu_merged_p20_peak_93274	12849.6	1.88222	0.335657	5.60758	2.0518e-08	3.79738e-06	2585.17	7489.91	6379.94	18660.2	23162	18820.3
3	6608288	6608386	3wt_3mu_merged_p20_peak_93768	2443	.	18.2833	244.396	241.691	61	3wt_3mu_merged_p20_peak_93768	15616.6	0.923133	0.237096	3.89351	9.88058e-05	0.0056982	11247.6	9723.95	11385.1	24381.5	20765.8	16195.5
3	6611902	6612018	3wt_3mu_merged_p20_peak_93769	4077	.	24.9942	407.768	404.843	52	3wt_3mu_merged_p20_peak_93769	29206.7	1.04594	0.214776	4.86992	1.11644e-06	0.000134078	17601.6	20711.9	18868.2	41504.9	45350.4	31203.2
3	720472	720549	3wt_3mu_merged_p20_peak_93331	1783	.	19.6487	178.388	175.81	38	3wt_3mu_merged_p20_peak_93331	9183.52	2.22607	0.323076	6.89024	5.56987e-12	2.04641e-09	2897.28	4444.56	2354.4	10707.2	19862.5	14835.2
3	724852	724972	3wt_3mu_merged_p20_peak_93332	7529	.	56.3742	752.983	749.745	56	3wt_3mu_merged_p20_peak_93332	33273.1	3.75895	0.756844	4.96662	6.8131e-07	8.64301e-05	1489.86	4038.91	8207.49	26121.2	89673.1	70108.2
3	7550311	7550393	3wt_3mu_merged_p20_peak_93855	4281	.	32.0486	428.108	425.161	46	3wt_3mu_merged_p20_peak_93855	22050.8	1.14678	0.212267	5.40257	6.5694e-08	1.06173e-05	11512.6	14244.9	15410.6	27789.9	32022.3	31324.5
3	8005196	8005261	3wt_3mu_merged_p20_peak_93910	635	.	9.23069	63.5037	61.3245	34	3wt_3mu_merged_p20_peak_93910	4826.51	1.48332	0.39221	3.78195	0.000155606	0.0082485	3280.05	2992.44	1350.08	7623.34	8757.44	4955.73
3	8032165	8032346	3wt_3mu_merged_p20_peak_93912a	612	.	8.99615	61.249	59.0851	23	3wt_3mu_merged_p20_peak_93912a	11976.7	1.51412	0.303367	4.99104	6.00542e-07	7.70293e-05	4758.13	7242.99	6635.14	11797.7	24579.2	16846.9
3	8032165	8032346	3wt_3mu_merged_p20_peak_93912b	449	.	7.44426	44.9168	42.8666	92	3wt_3mu_merged_p20_peak_93912b	11976.7	1.51412	0.303367	4.99104	6.00542e-07	7.70293e-05	4758.13	7242.99	6635.14	11797.7	24579.2	16846.9
3	8081342	8081449	3wt_3mu_merged_p20_peak_93916	1015	.	12.9432	101.513	99.1561	56	3wt_3mu_merged_p20_peak_93916	10130.9	1.66821	0.338613	4.92659	8.36781e-07	0.000103062	5400.01	4109.46	5038.1	7750.14	17655.5	20831.9
3	8082513	8082582	3wt_3mu_merged_p20_peak_93917	634	.	9.87576	63.4496	61.2707	31	3wt_3mu_merged_p20_peak_93917	4907.57	2.18352	0.38141	5.72486	1.03518e-08	2.07294e-06	1907.96	2457.44	938.469	6375.61	9195.58	8570.34
3	8561452	8561514	3wt_3mu_merged_p20_peak_93980	602	.	8.05609	60.2926	58.1347	38	3wt_3mu_merged_p20_peak_93980	5130.24	2.64765	0.314623	8.41531	3.91856e-17	2.47106e-14	1348.53	1358.06	1531.19	7658.85	7562.01	11322.8
3	8630139	8630194	3wt_3mu_merged_p20_peak_93995	352	.	6.89246	35.2727	33.3073	25	3wt_3mu_merged_p20_peak_93995	3090.2	1.97258	0.480224	4.10763	3.99744e-05	0.00274632	1943.3	1305.15	510.395	5564.08	5852.72	3365.55
3	8658109	8658248	3wt_3mu_merged_p20_peak_94000	3717	.	23.2187	371.786	368.903	50	3wt_3mu_merged_p20_peak_94000	34477.6	1.7084	0.234432	7.28737	3.16071e-13	1.38065e-10	21523.5	12739.9	14200.5	49102.8	58310.8	50987.8
3	866195	866316	3wt_3mu_merged_p20_peak_93340	1455	.	17.0768	145.586	143.089	55	3wt_3mu_merged_p20_peak_93340	12446.2	1.45079	0.358913	4.04218	5.29573e-05	0.00346161	10028.6	6843.22	3120	14607.6	23913.9	16163.6
3	8688298	8688542	3wt_3mu_merged_p20_peak_94005	3703	.	18.8931	370.353	367.471	165	3wt_3mu_merged_p20_peak_94005	67296.3	1.03403	0.220358	4.69252	2.69857e-06	0.000282423	56332.1	40383.2	35760.6	79763.6	105592	85946.1
3	8691987	8692313	3wt_3mu_merged_p20_peak_94006a	1894	.	13.3475	189.448	186.846	121	3wt_3mu_merged_p20_peak_94006a	50662.3	0.747326	0.193634	3.85948	0.000113628	0.00638735	37705.8	38660.6	37110.7	52967.8	73353.7	64175.4
3	8691987	8692313	3wt_3mu_merged_p20_peak_94006b	735	.	7.41939	73.5353	71.3017	279	3wt_3mu_merged_p20_peak_94006b	50662.3	0.747326	0.193634	3.85948	0.000113628	0.00638735	37705.8	38660.6	37110.7	52967.8	73353.7	64175.4
3	873174	873283	3wt_3mu_merged_p20_peak_93342	1678	.	17.086	167.84	165.287	41	3wt_3mu_merged_p20_peak_93342	14520.8	1.48646	0.309413	4.80415	1.55411e-06	0.000178364	12013.1	5273.51	5622.58	21434.6	22734.7	20046.4
3	883965	884190	3wt_3mu_merged_p20_peak_93343	3103	.	22.5082	310.347	307.542	127	3wt_3mu_merged_p20_peak_93343	39210.1	1.096	0.235209	4.65969	3.16684e-06	0.000322858	33301	22275.7	19395	47763.8	59928.1	52597.1
3	905062	905163	3wt_3mu_merged_p20_peak_93346	762	.	11.1102	76.2934	74.0452	30	3wt_3mu_merged_p20_peak_93346	7538.93	1.96147	0.398689	4.9198	8.66338e-07	0.000106551	5382.34	1951.85	1901.63	11381.8	15643.3	8972.67
3	912581	912679	3wt_3mu_merged_p20_peak_93348	1300	.	12.0529	130.068	127.616	48	3wt_3mu_merged_p20_peak_93348	11748.4	1.20829	0.257719	4.68841	2.75337e-06	0.000286947	7902.74	7907.32	5474.4	14658.3	19316.1	15231.2
3	937535	937657	3wt_3mu_merged_p20_peak_93349	7603	.	50.2985	760.385	757.141	55	3wt_3mu_merged_p20_peak_93349	37376.8	0.951845	0.197023	4.83115	1.35749e-06	0.000158633	27323.9	23821.9	25281	46769.7	57229	43835.2
3	9387614	9387761	3wt_3mu_merged_p20_peak_94059	473	.	8.2298	47.3483	45.2776	105	3wt_3mu_merged_p20_peak_94059	9487.41	0.963686	0.236484	4.07505	4.60037e-05	0.00307192	6636.65	6572.78	6083.58	12396.2	13522.9	11712.4
3	9915503	9915879	3wt_3mu_merged_p20_peak_94101a	1600	.	12.3108	160.066	157.532	127	3wt_3mu_merged_p20_peak_94101a	39322	0.899153	0.203682	4.41449	1.0125e-05	0.000874422	29832.5	30165.4	22342.1	46049.4	53253.2	54289.5
3	9915503	9915879	3wt_3mu_merged_p20_peak_94101b	392	.	5.29209	39.2632	37.2613	276	3wt_3mu_merged_p20_peak_94101b	39322	0.899153	0.203682	4.41449	1.0125e-05	0.000874422	29832.5	30165.4	22342.1	46049.4	53253.2	54289.5
3	9915503	9915879	3wt_3mu_merged_p20_peak_94101c	585	.	6.61282	58.5574	56.409	323	3wt_3mu_merged_p20_peak_94101c	39322	0.899153	0.203682	4.41449	1.0125e-05	0.000874422	29832.5	30165.4	22342.1	46049.4	53253.2	54289.5
4	1116708	1116840	3wt_3mu_merged_p20_peak_100587	916	.	10.8226	91.6735	89.3565	52	3wt_3mu_merged_p20_peak_100587	11519.8	1.05755	0.257406	4.10849	3.98247e-05	0.00273731	6342.21	8254.19	7837.04	14049.7	19397.3	13238.7
4	1433468	1433682	3wt_3mu_merged_p20_peak_100641a	619	.	7.09044	61.9117	59.743	57	3wt_3mu_merged_p20_peak_100641a	61333.1	0.761445	0.204193	3.72905	0.000192204	0.00967244	50231.3	38713.6	47598.5	75142.9	91128.2	65184.4
4	1433468	1433682	3wt_3mu_merged_p20_peak_100641b	8466	.	40.7619	846.688	843.38	151	3wt_3mu_merged_p20_peak_100641b	61333.1	0.761445	0.204193	3.72905	0.000192204	0.00967244	50231.3	38713.6	47598.5	75142.9	91128.2	65184.4
4	1542472	1542608	3wt_3mu_merged_p20_peak_100655	818	.	11.6246	81.8187	79.5442	102	3wt_3mu_merged_p20_peak_100655	9734.35	1.88308	0.269517	6.98689	2.81039e-12	1.10514e-09	3474.38	4473.96	4511.24	11934.6	18391.2	15620.8
4	15569669	15569751	3wt_3mu_merged_p20_peak_102726	1012	.	13.3734	101.296	98.94	39	3wt_3mu_merged_p20_peak_102726	7570.11	1.27383	0.322248	3.95295	7.71948e-05	0.00467907	4057.37	6120.09	3103.53	8201.56	11299.7	12638.4
4	1581970	1582107	3wt_3mu_merged_p20_peak_100661	624	.	9.77289	62.4075	60.2348	55	3wt_3mu_merged_p20_peak_100661	10199.1	1.69339	0.345184	4.90576	9.30679e-07	0.000113819	7461.08	3462.76	3523.37	12091.8	21263.4	13392
4	1757349	1757567	3wt_3mu_merged_p20_peak_100684	8009	.	25.5641	800.982	797.708	156	3wt_3mu_merged_p20_peak_100684	79828.4	0.830676	0.221265	3.75422	0.000173884	0.00897121	68651.4	44627.9	59107.1	99661.4	122988	83934.4
4	1785204	1785307	3wt_3mu_merged_p20_peak_100686	1533	.	17.6941	153.319	150.801	53	3wt_3mu_merged_p20_peak_100686	12001.1	1.38575	0.229533	6.03725	1.56759e-09	3.67856e-07	7054.76	5732.08	7145.53	16783.5	17038.9	18251.9
4	2005659	2005719	3wt_3mu_merged_p20_peak_100701	267	.	5.78466	26.7993	24.9299	27	3wt_3mu_merged_p20_peak_100701	3138.6	3.88727	0.412312	9.42798	4.18081e-21	3.6803e-18	388.659	329.227	477.467	3966.37	8184.07	5485.78
4	21935877	21935943	3wt_3mu_merged_p20_peak_103671	361	.	6.99533	36.1656	34.1914	33	3wt_3mu_merged_p20_peak_103671	3676.96	3.69209	0.357056	10.3404	4.62714e-25	5.69093e-22	647.766	393.896	543.324	6299.53	7637.74	6539.52
4	23102352	23102440	3wt_3mu_merged_p20_peak_103827	708	.	10.5959	70.868	68.6476	46	3wt_3mu_merged_p20_peak_103827	6861.76	2.71734	0.412238	6.59168	4.34874e-11	1.37869e-08	1201.31	2992.44	1234.83	6979.19	17293.1	11469.7
4	23138396	23138511	3wt_3mu_merged_p20_peak_103833	483	.	8.33268	48.3169	46.2388	38	3wt_3mu_merged_p20_peak_103833	7387.64	1.58826	0.295741	5.37042	7.8553e-08	1.24385e-05	3356.6	2939.53	4774.67	9849.99	13225.4	10179.7
4	2479592	2479839	3wt_3mu_merged_p20_peak_100792a	3136	.	14.7066	313.607	310.797	81	3wt_3mu_merged_p20_peak_100792a	73160.4	0.986399	0.235177	4.19429	2.73731e-05	0.00202687	47834.5	52094.3	47310.4	64669.1	125238	101816
4	2479592	2479839	3wt_3mu_merged_p20_peak_100792b	3101	.	14.605	310.155	307.35	188	3wt_3mu_merged_p20_peak_100792b	73160.4	0.986399	0.235177	4.19429	2.73731e-05	0.00202687	47834.5	52094.3	47310.4	64669.1	125238	101816
4	25746003	25746148	3wt_3mu_merged_p20_peak_104118	1864	.	20.2659	186.479	183.883	68	3wt_3mu_merged_p20_peak_104118	18280.3	1.99082	0.295399	6.73942	1.59025e-11	5.41797e-09	8556.39	8583.42	4898.15	19563	38058.9	30021.7
4	26118715	26118783	3wt_3mu_merged_p20_peak_104148	335	.	6.68672	33.5063	31.559	38	3wt_3mu_merged_p20_peak_104148	3887.88	1.87991	0.413206	4.54958	5.37541e-06	0.000506856	1825.52	1804.87	1350.08	2982.39	7924.43	7439.98
4	26340830	26340945	3wt_3mu_merged_p20_peak_104164	2562	.	20.1451	256.285	253.561	52	3wt_3mu_merged_p20_peak_104164	20028.7	1.12629	0.253621	4.44083	8.96123e-06	0.000788843	9039.27	13263.1	15460	23128.7	32292.7	26988.3
4	27279039	27279196	3wt_3mu_merged_p20_peak_104227	2342	.	16.3749	234.285	231.597	71	3wt_3mu_merged_p20_peak_104227	27973.8	0.850639	0.220518	3.85745	0.000114575	0.00642807	19751	21893.6	18226.1	32045.4	44896.1	31030.8
4	28595708	28595794	3wt_3mu_merged_p20_peak_104425	518	.	4.40071	51.855	49.7524	32	3wt_3mu_merged_p20_peak_104425	11015.3	1.92101	0.319624	6.0102	1.85289e-09	4.26721e-07	6931.09	3239.36	3630.39	15566.2	14934.7	21789.9
4	28596355	28596409	3wt_3mu_merged_p20_peak_104426	799	.	5.4594	79.9148	77.6496	27	3wt_3mu_merged_p20_peak_104426	8943.27	1.61071	0.357037	4.51133	6.44216e-06	0.000594874	4422.47	3956.6	4856.99	7019.76	12035.4	21368.4
4	29705422	29705506	3wt_3mu_merged_p20_peak_104477	397	.	7.40682	39.7993	37.7912	42	3wt_3mu_merged_p20_peak_104477	5086.74	2.55538	0.299341	8.53668	1.38137e-17	9.00573e-15	1531.08	1287.51	1621.74	8389.23	9823.04	7867.85
4	29843540	29843697	3wt_3mu_merged_p20_peak_104485	1341	.	16.151	134.165	131.7	101	3wt_3mu_merged_p20_peak_104485	16582.5	1.68957	0.302884	5.57825	2.4295e-08	4.37957e-06	5052.57	6825.58	11681.5	31102	22794.2	22038.9
4	30363399	30363527	3wt_3mu_merged_p20_peak_104501	2168	.	22.5291	216.805	214.148	39	3wt_3mu_merged_p20_peak_104501	16553.1	1.58183	0.354482	4.46237	8.10596e-06	0.000721243	8350.29	7572.22	8948.38	10037.7	37166.4	27243.7
4	30860674	30860726	3wt_3mu_merged_p20_peak_104510	388	.	7.30395	38.8817	36.8819	25	3wt_3mu_merged_p20_peak_104510	2884.58	1.68413	0.402639	4.18273	2.88033e-05	0.00211122	1095.31	1881.3	1127.81	3474.38	4370.61	5358.06
4	30887164	30887261	3wt_3mu_merged_p20_peak_104511	613	.	9.67002	61.3699	59.2034	29	3wt_3mu_merged_p20_peak_104511	7028.8	26.7525	3.90679	6.84769	7.50537e-12	2.69472e-09	0	0	0	0	27976.2	14196.6
4	30905899	30905960	3wt_3mu_merged_p20_peak_104512	1891	.	20.4716	189.193	186.592	36	3wt_3mu_merged_p20_peak_104512	7461.89	1.37094	0.358815	3.82075	0.000133048	0.00726928	2320.18	5849.66	4313.66	10788.3	7794.61	13704.9
4	31348210	31348285	3wt_3mu_merged_p20_peak_104528	613	.	9.67002	61.3699	59.2034	38	3wt_3mu_merged_p20_peak_104528	5415.12	2.26401	0.322	7.03108	2.04945e-12	8.13289e-10	1837.3	1405.09	2362.64	8835.57	7480.88	10569.2
4	31543279	31543350	3wt_3mu_merged_p20_peak_104531	425	.	7.71544	42.5876	40.5553	44	3wt_3mu_merged_p20_peak_104531	4158.08	4.09222	0.47003	8.7063	3.13963e-18	2.14067e-15	630.099	170.493	584.485	6319.82	5652.58	11591
4	31668423	31668496	3wt_3mu_merged_p20_peak_104535	572	.	9.25853	57.2657	55.1251	40	3wt_3mu_merged_p20_peak_104535	5058.86	1.78803	0.455714	3.92359	8.72402e-05	0.0051593	706.653	3239.36	2873.03	7547.26	9428.18	6558.67
4	32715546	32715639	3wt_3mu_merged_p20_peak_104564	407	.	7.5097	40.7229	38.7066	26	3wt_3mu_merged_p20_peak_104564	5263.33	1.65877	0.422941	3.92199	8.78212e-05	0.00518367	1955.07	2974.8	2667.23	4798.19	14139.6	5045.13
4	3392410	3392484	3wt_3mu_merged_p20_peak_100936	219	.	5.2465	21.9303	20.1286	12	3wt_3mu_merged_p20_peak_100936	3190.44	2.09983	0.379094	5.53907	3.04074e-08	5.32102e-06	1525.19	1193.45	897.308	4235.19	5052.16	6239.36
4	3409866	3409925	3wt_3mu_merged_p20_peak_100940	458	.	7.43639	45.8724	43.8145	28	3wt_3mu_merged_p20_peak_100940	4125.42	4.62968	0.566016	8.17941	2.85227e-16	1.67671e-13	147.219	252.799	568.021	2084.63	10645.2	11054.6
4	37415042	37415104	3wt_3mu_merged_p20_peak_104636	2538	.	25.2038	253.873	251.153	24	3wt_3mu_merged_p20_peak_104636	9393.48	4.85894	0.405107	11.9942	3.81044e-33	1.15928e-29	453.436	1158.17	255.198	20552.1	17222.8	16719.2
4	38001669	38001751	3wt_3mu_merged_p20_peak_104642	874	.	12.139	87.4396	85.1399	32	3wt_3mu_merged_p20_peak_104642	6378.27	1.78487	0.321382	5.55374	2.79622e-08	4.92294e-06	2025.74	3374.58	3210.55	8201.56	12625	8832.18
4	39396099	39396283	3wt_3mu_merged_p20_peak_104672a	388	.	7.30395	38.8817	36.8819	25	3wt_3mu_merged_p20_peak_104672a	12499.7	1.31379	0.350414	3.74925	0.000177364	0.00911419	5158.57	11911	4437.15	18781.9	13398.5	21310.9
4	39396099	39396283	3wt_3mu_merged_p20_peak_104672b	874	.	12.139	87.4396	85.1399	142	3wt_3mu_merged_p20_peak_104672b	12499.7	1.31379	0.350414	3.74925	0.000177364	0.00911419	5158.57	11911	4437.15	18781.9	13398.5	21310.9
4	40453714	40453805	3wt_3mu_merged_p20_peak_104688	1932	.	20.7803	193.282	190.672	40	3wt_3mu_merged_p20_peak_104688	13083.8	1.2204	0.27962	4.3645	1.27416e-05	0.00106692	5270.46	10793.9	7507.75	18396.4	17898.9	18635.1
4	40661065	40661167	3wt_3mu_merged_p20_peak_104693	3071	.	28.9072	307.151	304.351	38	3wt_3mu_merged_p20_peak_104693	19452.1	1.69644	0.328543	5.16353	2.42333e-07	3.38907e-05	4139.81	11105.5	12282.4	25974.1	34153.5	29057.4
4	40661512	40661603	3wt_3mu_merged_p20_peak_104694	897	.	12.3447	89.7138	87.4042	51	3wt_3mu_merged_p20_peak_104694	8585.03	1.46354	0.384733	3.80403	0.000142358	0.00767399	1849.08	6108.33	5754.3	10950.6	15767.7	11080.1
4	4217556	4217668	3wt_3mu_merged_p20_peak_101052	2787	.	26.9526	278.766	276.006	39	3wt_3mu_merged_p20_peak_101052	15589.6	1.04794	0.274303	3.82038	0.000133245	0.00727775	10093.4	8548.14	11854.3	13922.9	26115.5	23003.3
4	4264594	4264653	3wt_3mu_merged_p20_peak_101055	361	.	6.28368	36.1632	34.1914	29	3wt_3mu_merged_p20_peak_101055	3764.07	2.22983	0.36689	6.07764	1.21964e-09	2.96021e-07	1430.97	887.737	1654.67	5219.17	7248.28	6143.57
4	42938078	42938261	3wt_3mu_merged_p20_peak_104732a	2280	.	23.3521	228.075	225.398	35	3wt_3mu_merged_p20_peak_104732a	39257.8	0.927975	0.241615	3.84072	0.000122672	0.00680094	34478.8	21117.6	25552.7	63248.9	41093.4	50055.4
4	42938078	42938261	3wt_3mu_merged_p20_peak_104732b	5147	.	42.2806	514.71	511.674	113	3wt_3mu_merged_p20_peak_104732b	39257.8	0.927975	0.241615	3.84072	0.000122672	0.00680094	34478.8	21117.6	25552.7	63248.9	41093.4	50055.4
4	43395292	43395405	3wt_3mu_merged_p20_peak_104741	3781	.	33.6393	378.114	375.223	70	3wt_3mu_merged_p20_peak_104741	19463.7	1.66569	0.253173	6.57926	4.72786e-11	1.4907e-08	9763.59	9206.6	9014.24	20049.9	32103.4	36644.3
4	43606147	43606327	3wt_3mu_merged_p20_peak_104745	977	.	13.0648	97.7853	95.4428	79	3wt_3mu_merged_p20_peak_104745	17246.2	1.1552	0.282009	4.09632	4.19767e-05	0.00285804	13750.3	6414.05	11903.7	22418.6	26683.4	22307.2
4	44521334	44521561	3wt_3mu_merged_p20_peak_104753	3702	.	33.125	370.257	367.375	95	3wt_3mu_merged_p20_peak_104753	38178.2	1.0899	0.218132	4.99654	5.83686e-07	7.5201e-05	19244.5	27919.6	26054.9	47145	47773.8	60931.2
4	44573607	44573802	3wt_3mu_merged_p20_peak_104756	1475	.	16.4489	147.585	145.083	60	3wt_3mu_merged_p20_peak_104756	21329.9	1.17836	0.228321	5.16099	2.45648e-07	3.42989e-05	15569.9	12240.2	11401.6	25654.6	28154.7	34958.3
4	44873183	44873264	3wt_3mu_merged_p20_peak_104762	1973	.	21.0889	197.389	194.771	27	3wt_3mu_merged_p20_peak_104762	10182.9	1.54591	0.238555	6.48031	9.15342e-11	2.7274e-08	5647.34	5291.15	4642.95	14668.5	14236.9	16610.6
4	44878479	44878584	3wt_3mu_merged_p20_peak_104763	542	.	8.94991	54.2377	52.1171	62	3wt_3mu_merged_p20_peak_104763	6514.17	2.1346	0.411904	5.18228	2.19189e-07	3.09032e-05	3857.15	2051.79	1333.61	5974.91	14053	11814.6
4	47492735	47492793	3wt_3mu_merged_p20_peak_104812	897	.	12.3447	89.7138	87.4042	30	3wt_3mu_merged_p20_peak_104812	5078.81	2.64324	0.472076	5.59919	2.15356e-08	3.95197e-06	1054.09	1481.52	1671.13	2652.7	13733.9	9879.52
4	4795082	4795289	3wt_3mu_merged_p20_peak_101123	1946	.	20.8831	194.649	192.036	98	3wt_3mu_merged_p20_peak_101123	16818.2	1.73147	0.252236	6.86448	6.67331e-12	2.42104e-09	8144.18	6637.45	8577.93	22048.3	33807.3	21694.1
4	4802490	4802561	3wt_3mu_merged_p20_peak_101124	885	.	12.2418	88.5748	86.2702	36	3wt_3mu_merged_p20_peak_101124	6215.74	1.7238	0.400708	4.3019	1.69339e-05	0.00136017	2644.06	3821.38	2197.99	5442.35	15908.4	7280.32
4	4903356	4903470	3wt_3mu_merged_p20_peak_101144	2042	.	21.6032	204.277	201.645	63	3wt_3mu_merged_p20_peak_101144	13374.8	1.48302	0.353607	4.19398	2.74107e-05	0.00202793	5912.33	9424.12	5803.69	9707.97	29788.3	19612.2
4	51988850	51988948	3wt_3mu_merged_p20_peak_104949	646	.	9.22336	64.6246	62.439	41	3wt_3mu_merged_p20_peak_104949	7468.16	2.27063	0.330873	6.86253	6.76525e-12	2.44928e-09	1819.63	2651.45	3227.02	8470.38	16308.6	12331.8
4	5300729	5300824	3wt_3mu_merged_p20_peak_101195	1172	.	5.56942	117.288	114.876	58	3wt_3mu_merged_p20_peak_101195	20154.6	3.18291	0.341561	9.31871	1.17763e-20	1.00108e-17	6265.66	1957.72	3770.34	27206.7	45875.1	35852.4
4	53183336	53183423	3wt_3mu_merged_p20_peak_104978	908	.	12.4476	90.8562	88.5419	33	3wt_3mu_merged_p20_peak_104978	8522.37	3.22673	0.295255	10.9286	8.41294e-28	1.37636e-24	1743.08	1569.71	1621.74	18645	10299.1	17255.6
4	54435256	54435310	3wt_3mu_merged_p20_peak_105003	483	.	8.33268	48.3169	46.2388	28	3wt_3mu_merged_p20_peak_105003	3996.92	1.92469	0.393212	4.89479	9.84088e-07	0.000119675	1813.74	1481.52	1704.06	3342.5	7637.74	8001.97
4	5458988	5459045	3wt_3mu_merged_p20_peak_101222	448	.	7.02771	44.8478	42.798	30	3wt_3mu_merged_p20_peak_101222	4024.59	2.29077	0.445327	5.14402	2.68916e-07	3.72479e-05	1307.31	999.439	1794.62	2886.02	9649.95	7510.22
4	56138028	56138082	3wt_3mu_merged_p20_peak_105040	425	.	7.71544	42.5876	40.5553	27	3wt_3mu_merged_p20_peak_105040	3631.24	1.63835	0.433388	3.78032	0.000156626	0.00828008	1584.08	1369.82	2346.17	3099.04	4722.2	8666.14
4	5710932	5711073	3wt_3mu_merged_p20_peak_101253a	402	.	4.12143	40.2101	38.1997	25	3wt_3mu_merged_p20_peak_101253a	18492.6	0.90382	0.219495	4.11773	3.82621e-05	0.00264881	14527.6	13033.9	11080.5	27008.8	23508.2	21796.3
4	5710932	5711073	3wt_3mu_merged_p20_peak_101253b	729	.	5.5826	72.9513	70.7214	87	3wt_3mu_merged_p20_peak_101253b	18492.6	0.90382	0.219495	4.11773	3.82621e-05	0.00264881	14527.6	13033.9	11080.5	27008.8	23508.2	21796.3
4	574538	574825	3wt_3mu_merged_p20_peak_100497a	1470	.	14.5195	147.03	144.529	136	3wt_3mu_merged_p20_peak_100497a	34740.8	0.813202	0.205233	3.96233	7.42215e-05	0.00454813	22442.1	27996	25165.8	42554.8	51668.3	38617.6
4	574538	574825	3wt_3mu_merged_p20_peak_100497b	1108	.	12.0285	110.813	108.422	207	3wt_3mu_merged_p20_peak_100497b	34740.8	0.813202	0.205233	3.96233	7.42215e-05	0.00454813	22442.1	27996	25165.8	42554.8	51668.3	38617.6
4	5795226	5795339	3wt_3mu_merged_p20_peak_101273	6390	.	46.0545	639.019	635.872	65	3wt_3mu_merged_p20_peak_101273	33354.1	0.902606	0.216262	4.17367	2.99738e-05	0.00217943	25987.2	20664.9	23091.3	36569.7	53150.5	40661.2
4	58219158	58219220	3wt_3mu_merged_p20_peak_105066	412	.	5.83143	41.2437	39.2246	31	3wt_3mu_merged_p20_peak_105066	4944.38	1.37716	0.306445	4.49399	6.98993e-06	0.000633647	2473.29	3162.93	2609.6	8150.84	7324.01	5945.59
4	60153826	60153889	3wt_3mu_merged_p20_peak_105114	3101	.	29.1129	310.172	307.367	28	3wt_3mu_merged_p20_peak_105114	11948.5	1.06527	0.269071	3.95908	7.52405e-05	0.00459433	6607.21	8883.25	7688.86	13547.5	13685.2	21279
4	60482881	60483010	3wt_3mu_merged_p20_peak_105122	1730	.	19.2372	173.04	170.474	89	3wt_3mu_merged_p20_peak_105122	14726.5	2.40694	0.329257	7.31021	2.66727e-13	1.171e-10	2720.62	4803.19	6503.42	17534.2	34056.1	22741.4
4	61338572	61338674	3wt_3mu_merged_p20_peak_105134	1494	.	17.3855	149.441	146.934	51	3wt_3mu_merged_p20_peak_105134	13667.2	1.86937	0.362639	5.1549	2.53772e-07	3.53195e-05	9810.7	4903.13	2897.73	18873.2	27413.7	18105
4	62581677	62581771	3wt_3mu_merged_p20_peak_105153	687	.	10.3901	68.7269	66.518	37	3wt_3mu_merged_p20_peak_105153	7581.94	13.6127	1.23087	11.0595	1.97298e-28	3.4913e-25	0	0	0	9109.46	21815.2	14567
4	63082263	63082382	3wt_3mu_merged_p20_peak_105157	522	.	8.74417	52.2437	50.1369	26	3wt_3mu_merged_p20_peak_105157	7795.67	2.25058	0.360714	6.23922	4.39768e-10	1.1661e-07	4245.81	1846.02	2025.12	9139.89	16157.2	13360
4	68572980	68573051	3wt_3mu_merged_p20_peak_105257	454	.	8.02406	45.4274	43.3718	37	3wt_3mu_merged_p20_peak_105257	5001.83	1.27093	0.331206	3.83728	0.000124404	0.00688154	2326.07	4009.51	2453.19	6730.66	6534.27	7957.26
4	68776994	68777095	3wt_3mu_merged_p20_peak_105260	1837	.	20.0601	183.773	181.183	57	3wt_3mu_merged_p20_peak_105260	11359.3	2.79551	0.388725	7.19149	6.40865e-13	2.72393e-10	4369.47	1640.26	2568.44	11924.5	15773.1	31880.1
4	68853569	68853662	3wt_3mu_merged_p20_peak_105262	773	.	11.2131	77.3906	75.1371	60	3wt_3mu_merged_p20_peak_105262	6613.88	26.3926	3.9068	6.75556	1.42284e-11	4.89569e-09	0	0	0	0	29561.1	10122.2
4	69315271	69315336	3wt_3mu_merged_p20_peak_105266	234	.	5.45224	23.4927	21.6677	24	3wt_3mu_merged_p20_peak_105266	3270.47	1.46233	0.343316	4.25942	2.04959e-05	0.00159243	1631.19	1775.47	1819.31	5391.62	4062.28	4942.95
4	69691340	69691459	3wt_3mu_merged_p20_peak_105269	9272	.	66.147	927.236	923.872	56	3wt_3mu_merged_p20_peak_105269	38722.1	1.52373	0.245562	6.20507	5.46718e-10	1.41296e-07	14351	25826.7	19773.7	49493.4	69415.8	53472
4	6970053	6970157	3wt_3mu_merged_p20_peak_101454	1304	.	15.8424	130.407	127.953	55	3wt_3mu_merged_p20_peak_101454	11644.5	1.37803	0.324925	4.24108	2.22444e-05	0.00171294	7661.3	7683.92	4058.47	11488.3	23194.5	15780.4
4	7013286	7013374	3wt_3mu_merged_p20_peak_101457	379	.	7.20108	37.9702	35.9788	43	3wt_3mu_merged_p20_peak_101457	4997.41	1.67914	0.426945	3.93291	8.39242e-05	0.00499616	3285.94	2051.79	1794.62	5132.95	13025.3	4693.89
4	71819658	71819794	3wt_3mu_merged_p20_peak_105379	1156	.	14.6079	115.632	113.225	85	3wt_3mu_merged_p20_peak_105379	13524	1.6798	0.37039	4.5352	5.75479e-06	0.000537411	2502.73	10123.7	6676.3	20009.4	19364.8	22466.8
4	71940336	71940421	3wt_3mu_merged_p20_peak_105381	603	.	9.56715	60.3368	58.1767	41	3wt_3mu_merged_p20_peak_105381	6211.92	26.5811	3.9068	6.8038	1.01898e-11	3.56983e-09	0	0	0	0	25412.3	11859.3
4	71940739	71940893	3wt_3mu_merged_p20_peak_105382	2351	.	23.8664	235.181	232.492	95	3wt_3mu_merged_p20_peak_105382	20731.4	5.81214	1.2435	4.67401	2.95372e-06	0.00030417	895.094	793.672	485.699	1359.32	75474.1	45380.7
4	72129617	72129753	3wt_3mu_merged_p20_peak_105397	4805	.	34.1788	480.525	477.523	60	3wt_3mu_merged_p20_peak_105397	37617.9	1.07442	0.206285	5.20841	1.90467e-07	2.72525e-05	21918	27807.9	22943.1	46582	60009.3	46447.2
4	72370781	72370884	3wt_3mu_merged_p20_peak_105408	1869	.	15.1549	186.932	184.336	56	3wt_3mu_merged_p20_peak_105408	15690.2	1.02002	0.265959	3.83525	0.000125439	0.00691893	8020.52	12063.8	11006.4	15221.3	22826.7	25002.2
4	72609697	72609786	3wt_3mu_merged_p20_peak_105421	1411	.	11.0816	141.127	138.642	38	3wt_3mu_merged_p20_peak_105421	14776.6	1.61766	0.299669	5.39817	6.7324e-08	1.08432e-05	8014.63	4185.88	9598.72	20648.5	26299.4	19912.3
4	72663456	72663573	3wt_3mu_merged_p20_peak_105426	1598	.	18.2084	159.832	157.298	57	3wt_3mu_merged_p20_peak_105426	12702.9	1.20294	0.269769	4.45916	8.22797e-06	0.000731349	8462.17	5273.51	9351.76	15693	17850.2	19586.6
4	73256300	73256445	3wt_3mu_merged_p20_peak_105457	5438	.	32.6538	543.867	540.804	85	3wt_3mu_merged_p20_peak_105457	31956.6	0.952584	0.251153	3.79285	0.000148927	0.0079785	26340.5	20406.2	18571.8	57192.8	35489.5	33738.5
4	73299293	73299417	3wt_3mu_merged_p20_peak_105461	829	.	11.7275	82.9354	80.6557	24	3wt_3mu_merged_p20_peak_105461	8649.52	2.43041	0.383947	6.33006	2.4507e-10	6.85469e-08	3403.71	1722.56	2996.51	7217.58	22015.3	14541.5
4	73394336	73394505	3wt_3mu_merged_p20_peak_105468	9810	.	54.0799	981.041	977.639	86	3wt_3mu_merged_p20_peak_105468	63024.5	1.13908	0.211627	5.38248	7.3468e-08	1.17437e-05	42493.4	36755.8	38831.2	65252.4	103402	91412.7
4	73497928	73498040	3wt_3mu_merged_p20_peak_105472	3159	.	29.2439	315.992	313.18	54	3wt_3mu_merged_p20_peak_105472	16695.1	1.26618	0.292672	4.32626	1.51659e-05	0.00123301	13461.7	5979	9977.41	26329.2	25277	19146
4	73562036	73562192	3wt_3mu_merged_p20_peak_105478	1109	.	10.1784	110.942	108.551	67	3wt_3mu_merged_p20_peak_105478	16717.5	1.1384	0.287333	3.96196	7.43356e-05	0.00455351	8856.72	9006.71	13476.1	16103.9	31486.8	21374.8
4	73649764	73649907	3wt_3mu_merged_p20_peak_105483	4857	.	23.3166	485.76	482.753	75	3wt_3mu_merged_p20_peak_105483	39769.7	0.835244	0.223329	3.73997	0.000184043	0.00939371	23378.4	33604.7	28722.1	41195.5	60723.3	50994.2
4	73650914	73651116	3wt_3mu_merged_p20_peak_105485a	920	.	8.01485	92.0614	89.7421	29	3wt_3mu_merged_p20_peak_105485a	28075.9	2.19742	0.238265	9.2226	2.89991e-20	2.31747e-17	8815.5	11040.9	10298.5	36311	60485.3	41504.2
4	73650914	73651116	3wt_3mu_merged_p20_peak_105485b	1946	.	12.7742	194.635	192.023	116	3wt_3mu_merged_p20_peak_105485b	28075.9	2.19742	0.238265	9.2226	2.89991e-20	2.31747e-17	8815.5	11040.9	10298.5	36311	60485.3	41504.2
4	73672723	73672832	3wt_3mu_merged_p20_peak_105488	2141	.	17.3733	214.116	211.465	58	3wt_3mu_merged_p20_peak_105488	21167.4	0.95536	0.237328	4.02549	5.68563e-05	0.00366945	12937.6	16032.2	14241.7	21505.6	34813.4	27473.6
4	73756637	73756709	3wt_3mu_merged_p20_peak_105497	907	.	11.9545	90.7034	88.3906	30	3wt_3mu_merged_p20_peak_105497	6849.67	2.63329	0.432336	6.09084	1.12319e-09	2.75891e-07	1843.19	2392.77	1465.33	5437.27	21663.7	8295.73
4	74002161	74002327	3wt_3mu_merged_p20_peak_105516	2701	.	23.2121	270.137	267.391	95	3wt_3mu_merged_p20_peak_105516	29367.8	1.39799	0.291278	4.79951	1.59052e-06	0.000181701	10717.6	12446	25322.2	40678.1	39427.4	47615.8
4	74215694	74215748	3wt_3mu_merged_p20_peak_105533	293	.	5.91366	29.3843	27.4836	25	3wt_3mu_merged_p20_peak_105533	2970.59	1.56043	0.378412	4.12362	3.7297e-05	0.00259442	1366.2	1557.95	1588.81	3616.4	3818.87	5875.35
4	74359831	74359968	3wt_3mu_merged_p20_peak_105541	454	.	8.02406	45.4274	43.3718	63	3wt_3mu_merged_p20_peak_105541	8854.66	1.32921	0.260625	5.10009	3.39491e-07	4.5923e-05	4281.14	5714.44	5128.65	11691.2	11554	14758.6
4	74361498	74361587	3wt_3mu_merged_p20_peak_105542	1001	.	13.2706	100.122	97.7709	44	3wt_3mu_merged_p20_peak_105542	8223.41	2.67817	0.299816	8.9327	4.15743e-19	3.00402e-16	1648.86	2316.35	2708.39	10747.7	16860.4	15058.8
4	74574194	74574392	3wt_3mu_merged_p20_peak_105557	2253	.	19.0995	225.4	222.728	104	3wt_3mu_merged_p20_peak_105557	28600.9	1.0271	0.229216	4.48092	7.43209e-06	0.00066814	15016.4	20582.6	20893.3	32278.7	46535.1	36299.4
4	75138561	75138695	3wt_3mu_merged_p20_peak_105631a	430	.	5.29727	43.0309	40.9963	18	3wt_3mu_merged_p20_peak_105631a	10515.6	1.46645	0.303288	4.83518	1.33024e-06	0.000155974	7066.53	4321.1	5375.62	10336.9	19478.4	16514.8
4	75138561	75138695	3wt_3mu_merged_p20_peak_105631b	340	.	4.66143	34.0344	32.0839	107	3wt_3mu_merged_p20_peak_105631b	10515.6	1.46645	0.303288	4.83518	1.33024e-06	0.000155974	7066.53	4321.1	5375.62	10336.9	19478.4	16514.8
4	75450227	75450335	3wt_3mu_merged_p20_peak_105690	5134	.	40.0202	513.466	510.431	43	3wt_3mu_merged_p20_peak_105690	29332.9	1.06398	0.276116	3.85337	0.000116502	0.00651088	14303.8	17090.4	25560.9	32623.6	54340.5	32078.1
4	75458284	75458410	3wt_3mu_merged_p20_peak_105691a	435	.	7.81831	43.5285	41.4884	46	3wt_3mu_merged_p20_peak_105691a	8591.14	2.3865	0.398061	5.99531	2.031e-09	4.64042e-07	2143.52	3209.96	2922.42	5472.78	20517	17281.2
4	75458284	75458410	3wt_3mu_merged_p20_peak_105691b	593	.	9.46427	59.3084	57.1547	95	3wt_3mu_merged_p20_peak_105691b	8591.14	2.3865	0.398061	5.99531	2.031e-09	4.64042e-07	2143.52	3209.96	2922.42	5472.78	20517	17281.2
4	75511578	75511735	3wt_3mu_merged_p20_peak_105692	2524	.	25.1009	252.424	249.706	62	3wt_3mu_merged_p20_peak_105692	23598.7	8.46406	1.40456	6.02612	1.6794e-09	3.91973e-07	0	170.493	230.501	46232	33964.2	60995
4	75616061	75616210	3wt_3mu_merged_p20_peak_105693	5483	.	44.3381	548.395	545.327	68	3wt_3mu_merged_p20_peak_105693	36827.5	5.04346	0.273681	18.4282	7.79707e-76	1.35214e-71	2685.28	2298.71	1506.49	49924.5	69637.6	94912.4
4	75846617	75846670	3wt_3mu_merged_p20_peak_105696	676	.	10.2873	67.6627	65.4597	25	3wt_3mu_merged_p20_peak_105696	3963.82	1.75049	0.44738	3.91276	9.12487e-05	0.00534955	1766.63	1763.72	1918.1	5351.05	2650.49	10332.9
4	75851435	75851492	3wt_3mu_merged_p20_peak_105697	309	.	6.3781	30.9063	28.9874	27	3wt_3mu_merged_p20_peak_105697	3100.12	1.76467	0.417382	4.22795	2.35827e-05	0.00179448	771.43	1422.73	2041.58	4661.24	5003.48	4700.28
4	75872654	75872927	3wt_3mu_merged_p20_peak_105698a	3437	.	31.3761	343.799	340.95	42	3wt_3mu_merged_p20_peak_105698a	29792.2	0.862016	0.223594	3.85527	0.000115603	0.00647525	22989.8	19671.3	20778	37492.8	30058.7	47762.7
4	75872654	75872927	3wt_3mu_merged_p20_peak_105698b	897	.	12.3447	89.7138	87.4042	233	3wt_3mu_merged_p20_peak_105698b	29792.2	0.862016	0.223594	3.85527	0.000115603	0.00647525	22989.8	19671.3	20778	37492.8	30058.7	47762.7
4	76027053	76027201	3wt_3mu_merged_p20_peak_105699a	1354	.	16.2539	135.423	132.954	35	3wt_3mu_merged_p20_peak_105699a	14398.4	8.74894	0.6994	12.5092	6.64826e-36	2.88229e-32	11.7776	99.9439	90.554	22697.6	23659.7	39831
4	76027053	76027201	3wt_3mu_merged_p20_peak_105699b	697	.	10.493	69.7953	67.5807	110	3wt_3mu_merged_p20_peak_105699b	14398.4	8.74894	0.6994	12.5092	6.64826e-36	2.88229e-32	11.7776	99.9439	90.554	22697.6	23659.7	39831
4	76049910	76049986	3wt_3mu_merged_p20_peak_105701	407	.	7.5097	40.7229	38.7066	35	3wt_3mu_merged_p20_peak_105701	4676.19	2.20478	0.416613	5.29214	1.20892e-07	1.82778e-05	865.65	1387.46	2757.78	7953.03	5960.9	9132.33
4	76155194	76155310	3wt_3mu_merged_p20_peak_105702	613	.	9.67002	61.3699	59.2034	41	3wt_3mu_merged_p20_peak_105702	7710.78	3.96262	0.372399	10.6408	1.92473e-26	2.71364e-23	1054.09	1311.03	411.609	14511.2	11618.9	17357.8
4	76189018	76189085	3wt_3mu_merged_p20_peak_105703	1060	.	13.7849	106.024	103.65	28	3wt_3mu_merged_p20_peak_105703	5975.07	13.2691	1.22734	10.8112	3.04642e-27	4.93737e-24	0	0	0	13501.9	7973.11	14375.4
4	76278325	76278484	3wt_3mu_merged_p20_peak_105704	485	.	7.79997	48.5895	46.5101	42	3wt_3mu_merged_p20_peak_105704	9283.27	2.05588	0.37811	5.43725	5.411e-08	8.97088e-06	2826.61	1957.72	6025.96	12370.8	12516.8	20001.7
4	76304739	76305113	3wt_3mu_merged_p20_peak_105706a	15911	.	77.1423	1591.15	1587.35	135	3wt_3mu_merged_p20_peak_105706a	110122	1.04838	0.234058	4.47916	7.4936e-06	0.000672972	98189.5	56062.6	61091	173486	130967	140938
4	76304739	76305113	3wt_3mu_merged_p20_peak_105706b	208	.	4.3321	20.8643	19.0828	279	3wt_3mu_merged_p20_peak_105706b	110122	1.04838	0.234058	4.47916	7.4936e-06	0.000672972	98189.5	56062.6	61091	173486	130967	140938
4	76312861	76312923	3wt_3mu_merged_p20_peak_105707	1084	.	13.9907	108.407	106.024	30	3wt_3mu_merged_p20_peak_105707	5797.43	5.50375	0.436555	12.6072	1.92635e-36	8.79103e-33	176.663	241.041	337.519	5482.92	18526.4	10020
4	76336363	76336498	3wt_3mu_merged_p20_peak_105709	7626	.	52.1979	762.657	759.412	83	3wt_3mu_merged_p20_peak_105709	36287.7	2.46462	0.267116	9.22677	2.78908e-20	2.24964e-17	15746.6	10112	7524.21	65252.4	69610.6	49480.6
4	76349053	76349168	3wt_3mu_merged_p20_peak_105710	1191	.	10.5461	119.168	116.75	38	3wt_3mu_merged_p20_peak_105710	14122.3	14.5101	1.22085	11.8852	1.4137e-32	3.95416e-29	0	0	0	34627.1	15767.7	34338.8
4	76349352	76349463	3wt_3mu_merged_p20_peak_105711	4046	.	23.9119	404.647	401.726	57	3wt_3mu_merged_p20_peak_105711	26057.5	3.44115	0.252216	13.6437	2.20184e-42	1.52734e-38	2832.5	5097.14	5260.36	50786.8	45831.9	46536.6
4	76349813	76349926	3wt_3mu_merged_p20_peak_105712	1526	.	12.4357	152.672	150.156	37	3wt_3mu_merged_p20_peak_105712	15026.5	1.30417	0.216759	6.01667	1.78042e-09	4.12772e-07	8326.73	8818.58	8841.36	20268	19732.6	24171.9
4	76370637	76370774	3wt_3mu_merged_p20_peak_105713	1946	.	16.2195	194.609	191.997	75	3wt_3mu_merged_p20_peak_105713	19846.4	2.50433	0.289001	8.66545	4.49743e-18	3.02297e-15	4169.25	7819.14	5853.08	22722.9	41320.6	37193.5
4	76416201	76416384	3wt_3mu_merged_p20_peak_105715	1589	.	16.1485	158.947	156.415	118	3wt_3mu_merged_p20_peak_105715	23955.2	2.1278	0.313467	6.78796	1.13728e-11	3.96029e-09	13249.8	7725.07	5778.99	51025.2	25942.4	40009.8
4	76426405	76426512	3wt_3mu_merged_p20_peak_105716	1281	.	12.9979	128.129	125.682	38	3wt_3mu_merged_p20_peak_105716	12086.7	1.38881	0.288103	4.82053	1.43177e-06	0.000166193	8073.51	4191.76	7779.41	15764	16633.2	20078.4
4	76454977	76455124	3wt_3mu_merged_p20_peak_105718	2596	.	25.6153	259.685	256.955	74	3wt_3mu_merged_p20_peak_105718	23801.7	2.48057	0.262156	9.4622	3.01527e-21	2.68152e-18	10099.3	5338.18	6256.46	34475	41299	45342.3
4	76489272	76489712	3wt_3mu_merged_p20_peak_105723a	3246	.	12.2643	324.639	321.815	61	3wt_3mu_merged_p20_peak_105723a	107133	0.922538	0.187668	4.91579	8.84254e-07	0.000108524	69946.9	67379.8	84684.5	121410	149666	149713
4	76489272	76489712	3wt_3mu_merged_p20_peak_105723b	1436	.	7.54321	143.681	141.189	308	3wt_3mu_merged_p20_peak_105723b	107133	0.922538	0.187668	4.91579	8.84254e-07	0.000108524	69946.9	67379.8	84684.5	121410	149666	149713
4	76533652	76533718	3wt_3mu_merged_p20_peak_105724	702	.	8.13369	70.257	68.0406	36	3wt_3mu_merged_p20_peak_105724	6399.58	1.04622	0.280757	3.72643	0.000194212	0.00975205	3933.7	4697.36	3893.82	7182.07	9768.95	8921.58
4	76575442	76575586	3wt_3mu_merged_p20_peak_105726	3277	.	27.6207	327.722	324.893	51	3wt_3mu_merged_p20_peak_105726	26875.2	1.62794	0.266804	6.10162	1.05001e-09	2.60127e-07	17106.9	14174.4	8125.16	41418.6	44982.6	35443.7
4	76798514	76798614	3wt_3mu_merged_p20_peak_105734	277	.	4.76947	27.7552	25.8745	16	3wt_3mu_merged_p20_peak_105734	5423.38	1.51102	0.322553	4.68457	2.80552e-06	0.000291855	3050.39	2569.15	2831.87	9068.89	5447.03	9572.98
4	76839092	76839211	3wt_3mu_merged_p20_peak_105737	2659	.	16.3996	265.943	263.203	60	3wt_3mu_merged_p20_peak_105737	22959.9	5.22549	0.24746	21.1165	5.6071e-99	1.38909e-94	1389.75	852.463	1350.08	39354.3	43154.3	51658.3
4	76899595	76899722	3wt_3mu_merged_p20_peak_105741	2079	.	21.7966	207.914	205.274	65	3wt_3mu_merged_p20_peak_105741	17408	14.8118	1.21796	12.1611	5.00887e-34	1.60855e-30	0	0	0	19857.2	39746.5	44844.2
4	76922682	76922775	3wt_3mu_merged_p20_peak_105742	1857	.	13.0709	185.771	183.177	47	3wt_3mu_merged_p20_peak_105742	15741.6	4.12597	0.360327	11.4506	2.33488e-30	5.25852e-27	2208.29	2251.68	642.11	24325.7	35159.6	29862.1
4	76926325	76926522	3wt_3mu_merged_p20_peak_105743a	5203	.	29.1594	520.317	517.276	62	3wt_3mu_merged_p20_peak_105743a	38909	15.9722	1.1987	13.3246	1.66633e-40	9.96443e-37	0	0	0	62655.4	86946.9	83851.4
4	76926325	76926522	3wt_3mu_merged_p20_peak_105743b	714	.	7.8395	71.4797	69.257	166	3wt_3mu_merged_p20_peak_105743b	38909	15.9722	1.1987	13.3246	1.66633e-40	9.96443e-37	0	0	0	62655.4	86946.9	83851.4
4	76926735	76926952	3wt_3mu_merged_p20_peak_105744	3477	.	21.9807	347.757	344.904	114	3wt_3mu_merged_p20_peak_105744	42511.8	16.1	1.30101	12.3749	3.57148e-35	1.31777e-31	0	0	0	45704.5	106950	102416
4	76955037	76955099	3wt_3mu_merged_p20_peak_105745	687	.	10.3901	68.7269	66.518	32	3wt_3mu_merged_p20_peak_105745	4384.85	12.8228	1.22635	10.456	1.3755e-25	1.74112e-22	0	0	0	8211.7	10082.7	8014.74
4	77046092	77046279	3wt_3mu_merged_p20_peak_105748a	749	.	9.42349	74.9568	72.7164	28	3wt_3mu_merged_p20_peak_105748a	26322.9	0.836872	0.208984	4.00448	6.21535e-05	0.00392943	21229	15291.4	20168.8	32999	34580.8	33668.3
4	77046092	77046279	3wt_3mu_merged_p20_peak_105748b	2321	.	19.8106	232.122	229.439	136	3wt_3mu_merged_p20_peak_105748b	26322.9	0.836872	0.208984	4.00448	6.21535e-05	0.00392943	21229	15291.4	20168.8	32999	34580.8	33668.3
4	77053744	77053833	3wt_3mu_merged_p20_peak_105749	2084	.	18.5413	208.404	205.764	49	3wt_3mu_merged_p20_peak_105749	15955.2	0.84655	0.214893	3.93941	8.16835e-05	0.0048812	12755.1	11105.5	10347.9	20998.4	21404.1	19120.4
4	77061015	77061133	3wt_3mu_merged_p20_peak_105751	460	.	7.26595	46.0338	43.9751	49	3wt_3mu_merged_p20_peak_105751	8776.96	2.07749	0.281641	7.37639	1.62639e-13	7.26914e-11	4322.36	2927.77	2831.87	16134.3	11808.2	14637.3
4	77069158	77069264	3wt_3mu_merged_p20_peak_105752	2044	.	17.5671	204.477	201.844	57	3wt_3mu_merged_p20_peak_105752	15645.6	2.2036	0.30079	7.32604	2.37054e-13	1.04603e-10	7673.08	3891.93	5178.04	34895.9	20457.5	21777.1
4	77069389	77069492	3wt_3mu_merged_p20_peak_105753	1396	.	13.6097	139.603	137.122	66	3wt_3mu_merged_p20_peak_105753	12325.2	1.41223	0.311879	4.52814	5.95059e-06	0.000554502	10452.6	5167.69	4568.86	16788.6	18293.8	18679.8
4	77086464	77086581	3wt_3mu_merged_p20_peak_105757	741	.	8.24227	74.1459	71.9085	79	3wt_3mu_merged_p20_peak_105757	10521.7	1.43348	0.314402	4.55938	5.13053e-06	0.000487249	3721.71	5097.14	8248.65	13608.4	13614.9	18839.4
4	77217822	77217889	3wt_3mu_merged_p20_peak_105766	410	.	5.73752	41.0579	39.0398	38	3wt_3mu_merged_p20_peak_105766	5282.86	1.30648	0.323489	4.03871	5.37455e-05	0.00349994	2697.06	2998.32	3432.82	5422.06	9617.5	7529.38
4	77357790	77357918	3wt_3mu_merged_p20_peak_105778	1285	.	13.465	128.58	126.131	86	3wt_3mu_merged_p20_peak_105778	13650.9	1.59926	0.238393	6.70852	1.96611e-11	6.59487e-09	6218.55	8271.83	5828.39	19831.8	22372.3	19382.3
4	77871863	77871923	3wt_3mu_merged_p20_peak_105829	397	.	7.40682	39.7993	37.7912	32	3wt_3mu_merged_p20_peak_105829	3711.41	2.67371	0.39011	6.85373	7.19489e-12	2.58861e-09	753.764	717.244	1555.88	6471.98	6415.27	6354.31
4	779739	779923	3wt_3mu_merged_p20_peak_100524	11767	.	39.6902	1176.75	1173.21	67	3wt_3mu_merged_p20_peak_100524	94020.9	1.2805	0.295977	4.32633	1.51612e-05	0.00123301	33130.3	56174.3	75209.2	81706.2	167662	150243
4	956677	956828	3wt_3mu_merged_p20_peak_100564	2163	.	19.5173	216.398	213.742	108	3wt_3mu_merged_p20_peak_100564	19408.3	2.52252	0.278569	9.05526	1.36244e-19	1.04084e-16	3574.49	6272.95	7425.43	29524.6	39432.8	30219.7
5	1997918	1998077	3wt_3mu_merged_p20_peak_106121	1851	.	5.29306	185.176	182.584	64	3wt_3mu_merged_p20_peak_106121	52813.8	2.27688	0.220952	10.3049	6.69749e-25	8.17924e-22	14992.8	16855.2	22366.8	70978.7	99490.8	92198.2
5	3483252	3483523	3wt_3mu_merged_p20_peak_106263a	1945	.	18.3501	194.541	191.929	47	3wt_3mu_merged_p20_peak_106263a	27761.7	0.800768	0.196138	4.08267	4.45203e-05	0.00298667	22571.7	18154.5	20020.7	34454.7	37285.4	34083.4
5	3483252	3483523	3wt_3mu_merged_p20_peak_106263b	1345	.	14.2974	134.515	132.048	170	3wt_3mu_merged_p20_peak_106263b	27761.7	0.800768	0.196138	4.08267	4.45203e-05	0.00298667	22571.7	18154.5	20020.7	34454.7	37285.4	34083.4
5	40009868	40010085	3wt_3mu_merged_p20_peak_110371	4732	.	36.3914	473.281	470.286	126	3wt_3mu_merged_p20_peak_110371	43442.2	1.1563	0.221356	5.22371	1.7537e-07	2.53222e-05	25616.2	25321.1	29792.3	43914.1	68966.9	67042.8
5	42964746	42964812	3wt_3mu_merged_p20_peak_110706	435	.	7.81831	43.5285	41.4884	35	3wt_3mu_merged_p20_peak_110706	4287.93	1.31217	0.325557	4.03054	5.56499e-05	0.00361307	3097.5	1998.88	2288.55	5924.19	6555.91	5862.57
5	43285172	43285225	3wt_3mu_merged_p20_peak_110716	644	.	9.97864	64.4963	62.3112	22	3wt_3mu_merged_p20_peak_110716	3584.85	2.48342	0.330243	7.51998	5.47844e-14	2.63172e-11	1054.09	1146.42	1061.95	6258.95	6572.14	5415.54
5	43463436	43463569	3wt_3mu_merged_p20_peak_110731	995	.	7.39623	99.5558	97.207	72	3wt_3mu_merged_p20_peak_110731	19131.2	0.871719	0.218806	3.98397	6.77727e-05	0.00422294	11659.8	14591.8	14315.8	27774.7	24865.9	21579.1
5	451808	451972	3wt_3mu_merged_p20_peak_105987a	896	.	6.18392	89.6378	87.3297	37	3wt_3mu_merged_p20_peak_105987a	23047.8	12.797	0.875604	14.615	2.25206e-48	2.05549e-44	0	17.6372	0	33470.7	59289.9	45508.4
5	451808	451972	3wt_3mu_merged_p20_peak_105987b	579	.	4.90164	57.9323	55.7888	128	3wt_3mu_merged_p20_peak_105987b	23047.8	12.797	0.875604	14.615	2.25206e-48	2.05549e-44	0	17.6372	0	33470.7	59289.9	45508.4
5	453750	454074	3wt_3mu_merged_p20_peak_105988a	2724	.	10.9591	272.486	269.736	76	3wt_3mu_merged_p20_peak_105988a	69838	1.11076	0.213236	5.20907	1.89785e-07	2.71774e-05	38624.5	42799.5	51204.2	77242.8	117195	91961.9
5	453750	454074	3wt_3mu_merged_p20_peak_105988b	1351	.	7.19206	135.162	132.694	173	3wt_3mu_merged_p20_peak_105988b	69838	1.11076	0.213236	5.20907	1.89785e-07	2.71774e-05	38624.5	42799.5	51204.2	77242.8	117195	91961.9
5	453750	454074	3wt_3mu_merged_p20_peak_105988c	1377	.	7.27117	137.771	135.296	287	3wt_3mu_merged_p20_peak_105988c	69838	1.11076	0.213236	5.20907	1.89785e-07	2.71774e-05	38624.5	42799.5	51204.2	77242.8	117195	91961.9
5	45484435	45484581	3wt_3mu_merged_p20_peak_111001a	292	.	6.17235	29.2075	27.308	27	3wt_3mu_merged_p20_peak_111001a	8800.78	1.38323	0.369735	3.74114	0.000183186	0.00935433	2349.62	5696.8	6593.98	16869.8	12111.1	9183.42
5	45484435	45484581	3wt_3mu_merged_p20_peak_111001b	552	.	9.05278	55.2421	53.1148	114	3wt_3mu_merged_p20_peak_111001b	8800.78	1.38323	0.369735	3.74114	0.000183186	0.00935433	2349.62	5696.8	6593.98	16869.8	12111.1	9183.42
5	45794210	45794303	3wt_3mu_merged_p20_peak_111030	552	.	9.05278	55.2421	53.1148	30	3wt_3mu_merged_p20_peak_111030	6060.9	1.46677	0.344963	4.25196	2.1191e-05	0.00163837	2785.39	3944.84	2930.66	10139.1	11245.7	5319.74
5	4879896	4879992	3wt_3mu_merged_p20_peak_106390	317	.	6.48097	31.7662	29.8377	20	3wt_3mu_merged_p20_peak_106390	4755.93	1.4561	0.34963	4.16469	3.11778e-05	0.00224438	2061.07	2569.15	2996.51	6801.66	9298.36	4808.84
5	51209036	51209171	3wt_3mu_merged_p20_peak_111620	3749	.	33.4336	374.967	372.08	53	3wt_3mu_merged_p20_peak_111620	25727.9	1.00139	0.241094	4.15352	3.274e-05	0.002325	19515.4	20000.5	11895.5	32065.7	37956.1	32933.9
5	53003607	53004185	3wt_3mu_merged_p20_peak_111818a	316	.	4.95825	31.6408	29.717	48	3wt_3mu_merged_p20_peak_111818a	62984.9	0.711489	0.178024	3.9966	6.42591e-05	0.00403313	52421.9	43246.3	47614.9	75300.2	81305.2	78020.8
5	53003607	53004185	3wt_3mu_merged_p20_peak_111818b	796	.	8.34265	79.6518	77.3875	216	3wt_3mu_merged_p20_peak_111818b	62984.9	0.711489	0.178024	3.9966	6.42591e-05	0.00403313	52421.9	43246.3	47614.9	75300.2	81305.2	78020.8
5	53003607	53004185	3wt_3mu_merged_p20_peak_111818c	788	.	8.23251	78.8947	76.6345	403	3wt_3mu_merged_p20_peak_111818c	62984.9	0.711489	0.178024	3.9966	6.42591e-05	0.00403313	52421.9	43246.3	47614.9	75300.2	81305.2	78020.8
5	53003607	53004185	3wt_3mu_merged_p20_peak_111818d	2591	.	17.185	259.181	256.452	498	3wt_3mu_merged_p20_peak_111818d	62984.9	0.711489	0.178024	3.9966	6.42591e-05	0.00403313	52421.9	43246.3	47614.9	75300.2	81305.2	78020.8
5	53009056	53009224	3wt_3mu_merged_p20_peak_111819	2615	.	24.9542	261.543	258.81	75	3wt_3mu_merged_p20_peak_111819	25666.4	0.878724	0.235288	3.73467	0.000187964	0.00953937	15352	22264	16629	26775.5	39265.1	33713
5	53991004	53991137	3wt_3mu_merged_p20_peak_111850	4208	.	27.1824	420.88	417.94	70	3wt_3mu_merged_p20_peak_111850	29795.8	1.20081	0.301344	3.98485	6.75241e-05	0.00421063	12225.1	21664.3	20308.8	25091.6	58689.4	40795.3
5	54265064	54265275	3wt_3mu_merged_p20_peak_111858	2070	.	16.5313	207.087	204.449	105	3wt_3mu_merged_p20_peak_111858	35871.7	4.13351	0.629638	6.56491	5.2065e-11	1.63271e-08	1743.08	4691.48	5169.81	31482.4	92015.3	80128.2
5	54788005	54788103	3wt_3mu_merged_p20_peak_111915	346	.	3.44053	34.6361	32.6782	63	3wt_3mu_merged_p20_peak_111915	11944.3	1.24373	0.288664	4.30855	1.64327e-05	0.00132483	5771	9059.62	6445.8	15327.8	22302	12759.7
5	55275472	55275554	3wt_3mu_merged_p20_peak_111966	322	.	6.48139	32.213	30.2816	56	3wt_3mu_merged_p20_peak_111966	4908.72	1.6529	0.350975	4.70946	2.48379e-06	0.000264089	2832.5	2122.34	2148.6	4666.32	8843.99	8838.56
5	61971703	61971800	3wt_3mu_merged_p20_peak_112497	473	.	8.2298	47.3483	45.2776	70	3wt_3mu_merged_p20_peak_112497	5784.82	1.32639	0.314737	4.21428	2.50577e-05	0.00188358	2873.72	2780.79	4247.81	8145.77	9904.18	6756.65
5	63076615	63076787	3wt_3mu_merged_p20_peak_112635	3114	.	28.0603	311.461	308.654	130	3wt_3mu_merged_p20_peak_112635	22291.4	0.944835	0.207375	4.55616	5.20977e-06	0.000493902	14804.4	16126.2	14793.2	24909	32206.2	30909.4
5	633145	633699	3wt_3mu_merged_p20_peak_106006a	2168	.	12.3212	216.882	214.225	44	3wt_3mu_merged_p20_peak_106006a	187640	1.52216	0.205145	7.41996	1.17156e-13	5.33246e-11	87807.6	89978.9	112970	223811	338073	273197
5	633145	633699	3wt_3mu_merged_p20_peak_106006b	527	.	5.34146	52.7649	50.6557	190	3wt_3mu_merged_p20_peak_106006b	187640	1.52216	0.205145	7.41996	1.17156e-13	5.33246e-11	87807.6	89978.9	112970	223811	338073	273197
5	633145	633699	3wt_3mu_merged_p20_peak_106006c	9876	.	35.0028	987.655	984.249	371	3wt_3mu_merged_p20_peak_106006c	187640	1.52216	0.205145	7.41996	1.17156e-13	5.33246e-11	87807.6	89978.9	112970	223811	338073	273197
5	633145	633699	3wt_3mu_merged_p20_peak_106006d	12551	.	41.7605	1255.15	1251.56	465	3wt_3mu_merged_p20_peak_106006d	187640	1.52216	0.205145	7.41996	1.17156e-13	5.33246e-11	87807.6	89978.9	112970	223811	338073	273197
5	63669343	63669457	3wt_3mu_merged_p20_peak_112696	2166	.	10.9309	216.628	213.973	60	3wt_3mu_merged_p20_peak_112696	22886.3	2.42436	0.25253	9.60025	7.97475e-22	7.27868e-19	5276.35	9265.39	7022.05	44923.4	38745.9	32084.5
5	657697	657864	3wt_3mu_merged_p20_peak_106008	2182	.	22.632	218.207	215.548	88	3wt_3mu_merged_p20_peak_106008	20520.2	1.46694	0.23744	6.17817	6.48488e-10	1.66605e-07	9251.27	12992.7	10463.1	34809.7	31751.8	23852.6
5	66000758	66000885	3wt_3mu_merged_p20_peak_112911	3847	.	28.8381	384.788	381.889	46	3wt_3mu_merged_p20_peak_112911	26602.4	0.982007	0.240182	4.0886	4.33981e-05	0.00293292	23278.3	15791.1	14571	29448.5	39459.9	37065.8
5	66072304	66072434	3wt_3mu_merged_p20_peak_112925	752	.	11.0074	75.2002	72.9574	73	3wt_3mu_merged_p20_peak_112925	9819.34	1.57912	0.313082	5.04378	4.56424e-07	6.0191e-05	6353.99	5291.15	3120	12665	18905	12580.9
5	66749444	66749679	3wt_3mu_merged_p20_peak_112985	4825	.	30.7114	482.511	479.507	57	3wt_3mu_merged_p20_peak_112985	57278.3	1.94726	0.282233	6.89947	5.21966e-12	1.9259e-09	18926.5	30300.6	21535.4	52871.4	122799	97237
5	67835554	67835633	3wt_3mu_merged_p20_peak_113081	1217	.	15.1223	121.737	119.309	35	3wt_3mu_merged_p20_peak_113081	8208.77	1.33466	0.328684	4.06062	4.89425e-05	0.00323577	4593.25	4967.8	4420.68	6598.78	16027.4	12644.8
5	68220041	68220191	3wt_3mu_merged_p20_peak_113120	5247	.	42.8979	524.772	521.727	70	3wt_3mu_merged_p20_peak_113120	31942.9	0.957611	0.234497	4.08367	4.43295e-05	0.00298128	17843	25632.7	21667.1	33232.3	52333.7	40948.6
5	68399433	68399609	3wt_3mu_merged_p20_peak_113130	407	.	7.5097	40.7229	38.7066	100	3wt_3mu_merged_p20_peak_113130	10114.4	0.940296	0.252538	3.72338	0.000196573	0.00985513	7443.42	7907.32	5433.24	13623.6	13685.2	12593.7
5	68459684	68459756	3wt_3mu_merged_p20_peak_113134	863	.	12.0361	86.308	84.0132	36	3wt_3mu_merged_p20_peak_113134	6751.85	1.124	0.278169	4.04072	5.32869e-05	0.0034766	3874.82	4103.58	4766.43	8013.89	10996.8	8755.54
5	68475329	68475419	3wt_3mu_merged_p20_peak_113137	396	.	6.64509	39.6966	37.6923	42	3wt_3mu_merged_p20_peak_113137	5968.55	1.20278	0.300141	4.00739	6.13936e-05	0.00389416	4098.59	3991.88	2749.55	7455.96	9628.31	7887.01
5	69179814	69180044	3wt_3mu_merged_p20_peak_113217	3232	.	16.0903	323.279	320.457	100	3wt_3mu_merged_p20_peak_113217	56604.9	1.11196	0.209756	5.30122	1.15034e-07	1.75143e-05	39130.9	32299.5	35999.3	60484.6	92583.3	79132
5	69808562	69808796	3wt_3mu_merged_p20_peak_113261	5244	.	25.5422	524.494	521.449	83	3wt_3mu_merged_p20_peak_113261	65571.9	0.842718	0.191975	4.38972	1.13497e-05	0.000966232	51326.6	42346.8	47170.4	98195.5	75917.6	78474.2
5	71911607	71911802	3wt_3mu_merged_p20_peak_113413	874	.	12.139	87.4396	85.1399	76	3wt_3mu_merged_p20_peak_113413	15672.8	1.51901	0.326429	4.6534	3.26509e-06	0.000331316	12949.4	6960.8	4404.22	24868.4	23140.4	21713.2
5	72114855	72114981	3wt_3mu_merged_p20_peak_113434	1946	.	20.8831	194.649	192.036	44	3wt_3mu_merged_p20_peak_113434	15291	1.57636	0.307587	5.12493	2.97644e-07	4.08357e-05	6454.1	5055.98	11541.5	24153.3	17904.3	26637
5	72216990	72217107	3wt_3mu_merged_p20_peak_113448	1861	.	16.9744	186.14	183.546	70	3wt_3mu_merged_p20_peak_113448	17427.8	1.29407	0.229226	5.64538	1.64819e-08	3.1409e-06	9793.04	11905.1	8586.17	24249.6	28089.8	21943.1
5	72392617	72392684	3wt_3mu_merged_p20_peak_113473	1930	.	7.94586	193.099	190.49	36	3wt_3mu_merged_p20_peak_113473	17992.9	1.35173	0.224733	6.01481	1.80097e-09	4.16978e-07	8621.17	11105.5	10668.9	27399.4	28257.5	21904.8
5	8094560	8094731	3wt_3mu_merged_p20_peak_106754	1105	.	5.47877	110.546	108.157	116	3wt_3mu_merged_p20_peak_106754	32761.3	0.797879	0.1896	4.20822	2.57395e-05	0.00192814	23755.3	25062.4	22959.6	41763.5	45469.4	37557.5
5	8240982	8241087	3wt_3mu_merged_p20_peak_106771	1455	.	17.0768	145.586	143.089	39	3wt_3mu_merged_p20_peak_106771	12510.2	1.2984	0.334689	3.87943	0.000104704	0.00597018	4858.24	9059.62	7779.41	9880.42	23513.6	19969.8
6	10037164	10037382	3wt_3mu_merged_p20_peak_114572	6156	.	29.7934	615.628	612.501	100	3wt_3mu_merged_p20_peak_114572	70102.9	1.46616	0.210104	6.97826	2.98857e-12	1.15943e-09	35580	36109.1	40099	124814	105911	78103.8
6	10871851	10872115	3wt_3mu_merged_p20_peak_114668a	11928	.	34.7367	1192.87	1189.32	65	3wt_3mu_merged_p20_peak_114668a	111318	0.795771	0.206921	3.84577	0.000120173	0.00668159	67226.3	88321	88578.3	169605	139302	114876
6	10871851	10872115	3wt_3mu_merged_p20_peak_114668b	503	.	4.68224	50.3754	48.2823	233	3wt_3mu_merged_p20_peak_114668b	111318	0.795771	0.206921	3.84577	0.000120173	0.00668159	67226.3	88321	88578.3	169605	139302	114876
6	11365466	11365622	3wt_3mu_merged_p20_peak_114732	6902	.	18.4957	690.243	687.053	76	3wt_3mu_merged_p20_peak_114732	69540.1	5.60507	0.304861	18.3857	1.71152e-75	2.69823e-71	1218.98	3739.08	3449.28	128045	140298	140491
6	121278	121351	3wt_3mu_merged_p20_peak_113513	340	.	2.91318	34.0778	32.127	25	3wt_3mu_merged_p20_peak_113513	11150.1	1.79318	0.321312	5.5808	2.39421e-08	4.33396e-06	6860.43	4967.8	3144.69	22043.3	17482.4	12402.1
6	15603039	15603201	3wt_3mu_merged_p20_peak_115341	7098	.	19.7657	709.888	706.683	97	3wt_3mu_merged_p20_peak_115341	87970.2	1.24053	0.189664	6.54065	6.12537e-11	1.8901e-08	44772.4	59343.1	52842.4	137595	112830	120438
6	16704541	16704597	3wt_3mu_merged_p20_peak_115491	275	.	5.96661	27.5371	25.658	25	3wt_3mu_merged_p20_peak_115491	2991.88	1.6012	0.412412	3.88252	0.00010338	0.00590699	1466.31	1028.83	1959.26	3195.41	5831.08	4470.37
6	18079750	18080068	3wt_3mu_merged_p20_peak_115516a	3411	.	21.2127	341.143	338.297	106	3wt_3mu_merged_p20_peak_115516a	66445.1	1.17615	0.304363	3.86431	0.000111404	0.00627453	24903.6	53752.2	43647	55158.9	128819	92389.8
6	18079750	18080068	3wt_3mu_merged_p20_peak_115516b	2618	.	17.991	261.863	259.13	191	3wt_3mu_merged_p20_peak_115516b	66445.1	1.17615	0.304363	3.86431	0.000111404	0.00627453	24903.6	53752.2	43647	55158.9	128819	92389.8
6	18234844	18234939	3wt_3mu_merged_p20_peak_115524	562	.	9.15566	56.2515	54.1174	36	3wt_3mu_merged_p20_peak_115524	6216.91	1.6919	0.35093	4.8212	1.42696e-06	0.000165745	3044.5	3862.54	1901.63	6471.98	10353.1	11667.7
6	18400506	18400723	3wt_3mu_merged_p20_peak_115543a	522	.	8.74417	52.2437	50.1369	56	3wt_3mu_merged_p20_peak_115543a	16669.8	1.38348	0.258696	5.3479	8.8981e-08	1.38021e-05	9062.83	10053.2	8594.4	16443.7	29674.7	26190
6	18400506	18400723	3wt_3mu_merged_p20_peak_115543b	1690	.	18.9285	169.052	166.496	177	3wt_3mu_merged_p20_peak_115543b	16669.8	1.38348	0.258696	5.3479	8.8981e-08	1.38021e-05	9062.83	10053.2	8594.4	16443.7	29674.7	26190
6	18569333	18569439	3wt_3mu_merged_p20_peak_115562	3875	.	34.2566	387.585	384.683	42	3wt_3mu_merged_p20_peak_115562	17731	1.10961	0.266074	4.17032	3.04175e-05	0.00220154	10405.5	14803.5	8470.92	19279	24536	28891.4
6	18618081	18618227	3wt_3mu_merged_p20_peak_115566	33366	.	86.9705	3336.66	3331.66	62	3wt_3mu_merged_p20_peak_115566	165589	0.730152	0.162342	4.49761	6.87202e-06	0.000625902	118588	129804	125286	212033	202368	205458
6	18698353	18698550	3wt_3mu_merged_p20_peak_115574	7562	.	26.2679	756.233	752.993	110	3wt_3mu_merged_p20_peak_115574	80385.2	1.17448	0.177503	6.61669	3.67321e-11	1.184e-08	52551.5	46579.7	48948.6	112179	121820	100232
6	18751104	18751158	3wt_3mu_merged_p20_peak_115581	275	.	3.04737	27.5618	25.6825	24	3wt_3mu_merged_p20_peak_115581	6760.45	1.15326	0.296878	3.88462	0.000102489	0.00587543	5064.35	3556.83	3959.68	11214.4	9455.22	7312.25
6	18767172	18767321	3wt_3mu_merged_p20_peak_115583	1273	.	11.5449	127.399	124.954	118	3wt_3mu_merged_p20_peak_115583	14966.2	1.83968	0.262941	6.99654	2.62369e-12	1.03407e-09	8055.85	5908.45	5639.04	17214.7	25671.9	27307.6
6	19352112	19352284	3wt_3mu_merged_p20_peak_115631a	452	.	5.39239	45.2659	43.2139	61	3wt_3mu_merged_p20_peak_115631a	15366.3	1.77365	0.254081	6.98064	2.9384e-12	1.14252e-09	9286.6	5561.58	6009.49	24097.5	22431.8	24810.6
6	19352112	19352284	3wt_3mu_merged_p20_peak_115631b	362	.	4.77234	36.2004	34.2261	142	3wt_3mu_merged_p20_peak_115631b	15366.3	1.77365	0.254081	6.98064	2.9384e-12	1.14252e-09	9286.6	5561.58	6009.49	24097.5	22431.8	24810.6
6	19510970	19511158	3wt_3mu_merged_p20_peak_115643a	393	.	6.58265	39.3914	37.3888	43	3wt_3mu_merged_p20_peak_115643a	12718.9	1.68043	0.2818	5.96321	2.47324e-09	5.54133e-07	7684.86	4961.92	5499.1	24645.3	19299.9	14222.2
6	19510970	19511158	3wt_3mu_merged_p20_peak_115643b	593	.	8.37735	59.3216	57.1679	138	3wt_3mu_merged_p20_peak_115643b	12718.9	1.68043	0.2818	5.96321	2.47324e-09	5.54133e-07	7684.86	4961.92	5499.1	24645.3	19299.9	14222.2
6	19683383	19683490	3wt_3mu_merged_p20_peak_115663	943	.	12.7562	94.3051	91.9765	40	3wt_3mu_merged_p20_peak_115663	9927.47	1.21858	0.325279	3.74626	0.00017949	0.0091954	4469.58	5914.33	7524.21	9357.99	20132.9	12165.8
6	19926718	19926878	3wt_3mu_merged_p20_peak_115696	1181	.	9.99591	118.179	115.763	112	3wt_3mu_merged_p20_peak_115696	18808.7	0.843912	0.218803	3.85695	0.000114811	0.00643559	14021.2	14874	11475.7	21358.5	26580.6	24542.3
6	19932307	19932438	3wt_3mu_merged_p20_peak_115697	1229	.	15.2251	122.967	120.535	68	3wt_3mu_merged_p20_peak_115697	14046.1	0.89896	0.235662	3.81461	0.000136397	0.00741252	8126.51	11511.2	9779.83	17666.1	16903.6	20289.1
6	20646145	20646221	3wt_3mu_merged_p20_peak_115708	1471	.	6.00826	147.146	144.645	35	3wt_3mu_merged_p20_peak_115708	17785.3	4.42607	0.279332	15.8452	1.51712e-56	1.87924e-52	1136.53	1463.88	2156.83	30650.6	42840.6	28463.5
6	20647295	20647402	3wt_3mu_merged_p20_peak_115709	1560	.	6.20721	156.027	153.502	42	3wt_3mu_merged_p20_peak_115709	25174.7	0.996345	0.265751	3.74916	0.000177425	0.00911419	11076.8	15908.7	23461.7	34140.2	35960.1	30500.7
6	20649883	20650096	3wt_3mu_merged_p20_peak_115711	4794	.	12.0648	479.425	476.424	53	3wt_3mu_merged_p20_peak_115711	93661.9	0.992396	0.222257	4.46509	8.00358e-06	0.000713965	47781.5	69837.3	70368.7	100143	150548	123293
6	20992594	20992663	3wt_3mu_merged_p20_peak_115739	579	.	8.77274	57.9475	55.8039	37	3wt_3mu_merged_p20_peak_115739	5184.59	1.82795	0.326566	5.59749	2.17482e-08	3.98677e-06	2290.73	2510.36	2033.35	7400.17	10780.5	6092.48
6	21317483	21317824	3wt_3mu_merged_p20_peak_115764a	664	.	8.79481	66.4436	64.2489	72	3wt_3mu_merged_p20_peak_115764a	36848.3	1.16815	0.209757	5.56909	2.56077e-08	4.54998e-06	20045.4	24586.2	23453.5	41307	52842.1	58855.6
6	21317483	21317824	3wt_3mu_merged_p20_peak_115764b	1005	.	11.3736	100.503	98.1505	171	3wt_3mu_merged_p20_peak_115764b	36848.3	1.16815	0.209757	5.56909	2.56077e-08	4.54998e-06	20045.4	24586.2	23453.5	41307	52842.1	58855.6
6	21317483	21317824	3wt_3mu_merged_p20_peak_115764c	932	.	10.7662	93.285	90.9608	280	3wt_3mu_merged_p20_peak_115764c	36848.3	1.16815	0.209757	5.56909	2.56077e-08	4.54998e-06	20045.4	24586.2	23453.5	41307	52842.1	58855.6
6	21357971	21358061	3wt_3mu_merged_p20_peak_115770	762	.	11.1102	76.2934	74.0452	45	3wt_3mu_merged_p20_peak_115770	6793.86	2.26231	0.365753	6.18537	6.19567e-10	1.59648e-07	1430.97	3139.41	2461.42	7308.87	15329.6	11092.9
6	21386050	21386240	3wt_3mu_merged_p20_peak_115773	1510	.	13.1145	151.006	148.494	78	3wt_3mu_merged_p20_peak_115773	25733.7	1.33974	0.246963	5.42489	5.79908e-08	9.46943e-06	13296.9	19036.4	11385.1	31315	44014.4	35354.3
6	21432579	21432708	3wt_3mu_merged_p20_peak_115777	3460	.	24.6836	346.034	343.183	65	3wt_3mu_merged_p20_peak_115777	30469.7	1.92882	0.268242	7.19059	6.4513e-13	2.73535e-10	8409.18	17713.6	11903.7	45608.2	57245.2	41938.5
6	21467187	21467319	3wt_3mu_merged_p20_peak_115778	4069	.	30.9294	406.931	404.007	60	3wt_3mu_merged_p20_peak_115778	27682.9	1.15387	0.240553	4.79676	1.61249e-06	0.000183652	12560.8	18860	20086.5	31345.5	44052.2	39192.4
6	21868219	21868298	3wt_3mu_merged_p20_peak_115815	1034	.	9.89599	103.48	101.116	45	3wt_3mu_merged_p20_peak_115815	9138.27	1.416	0.352325	4.01903	5.84395e-05	0.00375207	3174.05	5626.25	6149.44	7445.82	16979.4	15454.7
6	22685568	22685842	3wt_3mu_merged_p20_peak_115858a	245	.	3.72864	24.538	22.7	15	3wt_3mu_merged_p20_peak_115858a	113358	1.1843	0.208536	5.6791	1.35409e-08	2.63844e-06	63416.3	86680.7	57732.3	170513	167587	134220
6	22685568	22685842	3wt_3mu_merged_p20_peak_115858b	15434	.	50.9153	1543.46	1539.69	165	3wt_3mu_merged_p20_peak_115858b	113358	1.1843	0.208536	5.6791	1.35409e-08	2.63844e-06	63416.3	86680.7	57732.3	170513	167587	134220
6	23010266	23010462	3wt_3mu_merged_p20_peak_115873	9443	.	54.9311	944.313	940.936	80	3wt_3mu_merged_p20_peak_115873	57092	1.18679	0.256992	4.618	3.87452e-06	0.000384385	28495.8	38960.5	37094.2	49828.2	102974	85198.9
6	23146003	23146114	3wt_3mu_merged_p20_peak_115885	2435	.	21.3794	243.515	240.812	71	3wt_3mu_merged_p20_peak_115885	16539.5	2.13487	0.238776	8.94086	3.8615e-19	2.81364e-16	5600.23	5208.84	7606.54	24209.1	30626.7	25985.6
6	24053599	24053991	3wt_3mu_merged_p20_peak_115955a	2159	.	13.3185	215.965	213.311	65	3wt_3mu_merged_p20_peak_115955a	125053	1.13116	0.271766	4.16226	3.15114e-05	0.00225737	65442	83535.4	86207.4	97992.7	244224	172914
6	24053599	24053991	3wt_3mu_merged_p20_peak_115955b	7581	.	31.6261	758.116	754.873	230	3wt_3mu_merged_p20_peak_115955b	125053	1.13116	0.271766	4.16226	3.15114e-05	0.00225737	65442	83535.4	86207.4	97992.7	244224	172914
6	24053599	24053991	3wt_3mu_merged_p20_peak_115955c	3653	.	18.9134	365.353	362.478	313	3wt_3mu_merged_p20_peak_115955c	125053	1.13116	0.271766	4.16226	3.15114e-05	0.00225737	65442	83535.4	86207.4	97992.7	244224	172914
6	24103551	24103669	3wt_3mu_merged_p20_peak_115959	436	.	7.48371	43.604	41.5635	81	3wt_3mu_merged_p20_peak_115959	7610.49	1.65619	0.286309	5.78462	7.26779e-09	1.49685e-06	3974.93	2657.33	4371.29	11189	10742.6	12727.8
6	24166477	24166703	3wt_3mu_merged_p20_peak_115967	2522	.	10.5071	252.226	249.508	91	3wt_3mu_merged_p20_peak_115967	59796.7	1.09197	0.189901	5.75021	8.91301e-09	1.79937e-06	37682.3	42664.3	34212.9	74214.7	91863.9	78142.1
6	24311149	24311261	3wt_3mu_merged_p20_peak_115977	795	.	11.4189	79.5969	77.3328	48	3wt_3mu_merged_p20_peak_115977	9590.26	1.9122	0.414055	4.61824	3.87006e-06	0.000384162	2114.07	5144.17	4824.06	10544.9	26299.4	8615.05
6	2645116	2645226	3wt_3mu_merged_p20_peak_113808	730	.	10.8016	73.0259	70.7942	62	3wt_3mu_merged_p20_peak_113808	8081.76	1.36292	0.261751	5.20694	1.91979e-07	2.74462e-05	4493.14	4814.94	4264.27	9520.3	13046.9	12351
6	26869922	26870084	3wt_3mu_merged_p20_peak_116322	2414	.	14.7453	241.468	238.769	57	3wt_3mu_merged_p20_peak_116322	27654.7	0.971754	0.214024	4.54041	5.6145e-06	0.000525726	18255.2	19036.4	18744.7	44964	34299.5	30628.4
6	26872202	26872333	3wt_3mu_merged_p20_peak_116324	2183	.	15.6195	218.317	215.658	71	3wt_3mu_merged_p20_peak_116324	21811.2	2.21357	0.307388	7.20121	5.96802e-13	2.54287e-10	8332.62	7589.86	7285.48	17706.6	43792.6	46159.8
6	27146460	27146600	3wt_3mu_merged_p20_peak_116361	4430	.	14.6876	443.007	440.043	48	3wt_3mu_merged_p20_peak_116361	51772	1.05417	0.276666	3.81025	0.000138825	0.00751173	39884.7	31840.9	29240.7	55032.1	106328	48305.6
6	27453036	27453156	3wt_3mu_merged_p20_peak_116388	821	.	10.4581	82.1731	79.8974	42	3wt_3mu_merged_p20_peak_116388	10335.7	1.16437	0.290634	4.0063	6.16772e-05	0.00390946	6565.99	8007.27	4552.4	14039.5	17558.2	11290.9
6	27582814	27583106	3wt_3mu_merged_p20_peak_116406a	2166	.	18.938	216.669	214.013	64	3wt_3mu_merged_p20_peak_116406a	31450.6	1.20549	0.214481	5.62049	1.90416e-08	3.55066e-06	23148.8	15444.3	18481.2	40936.8	43619.5	47073
6	27582814	27583106	3wt_3mu_merged_p20_peak_116406b	441	.	6.80466	44.173	42.1295	223	3wt_3mu_merged_p20_peak_116406b	31450.6	1.20549	0.214481	5.62049	1.90416e-08	3.55066e-06	23148.8	15444.3	18481.2	40936.8	43619.5	47073
6	27891948	27892019	3wt_3mu_merged_p20_peak_116452	345	.	3.80599	34.5776	32.6201	31	3wt_3mu_merged_p20_peak_116452	7678.67	1.38658	0.282979	4.89995	9.58594e-07	0.000117067	3439.05	3897.81	5416.78	9738.4	11797.4	11782.6
6	27913029	27913155	3wt_3mu_merged_p20_peak_116456a	326	.	6.58384	32.6329	30.6949	31	3wt_3mu_merged_p20_peak_116456a	8534.32	1.39145	0.299529	4.64547	3.393e-06	0.000342492	6265.66	4615.06	3243.48	11762.2	14258.6	11061
6	27913029	27913155	3wt_3mu_merged_p20_peak_116456b	840	.	11.8303	84.0558	81.771	97	3wt_3mu_merged_p20_peak_116456b	8534.32	1.39145	0.299529	4.64547	3.393e-06	0.000342492	6265.66	4615.06	3243.48	11762.2	14258.6	11061
6	28205287	28205411	3wt_3mu_merged_p20_peak_116479	3124	.	22.5491	312.482	309.675	40	3wt_3mu_merged_p20_peak_116479	25345.1	3.1017	0.59242	5.23564	1.64416e-07	2.4061e-05	2025.74	8095.45	5746.06	31193.3	55644.1	49365.7
6	28332531	28332614	3wt_3mu_merged_p20_peak_116495	634	.	9.87576	63.4496	61.2707	41	3wt_3mu_merged_p20_peak_116495	6030.22	3.87315	1.00912	3.83815	0.000123966	0.0068639	1595.86	105.823	609.181	14059.8	14209.9	5600.74
6	29789979	29790204	3wt_3mu_merged_p20_peak_116668	7417	.	11.4325	741.738	738.509	122	3wt_3mu_merged_p20_peak_116668	123992	1.61808	0.17422	9.28759	1.57827e-20	1.31586e-17	57821.9	57503	67487.4	171847	194660	194634
6	30564704	30564921	3wt_3mu_merged_p20_peak_116753	2547	.	20.3388	254.782	252.06	119	3wt_3mu_merged_p20_peak_116753	27713	0.928302	0.194177	4.78069	1.74696e-06	0.000197105	20410.5	17014	19856	37710.9	36890.5	34396.3
6	31349221	31349485	3wt_3mu_merged_p20_peak_116841a	6468	.	25.5054	646.838	643.685	56	3wt_3mu_merged_p20_peak_116841a	84171.3	1.14843	0.235976	4.86675	1.13449e-06	0.000135869	59741.7	43528.5	53731.5	87924.6	156536	103566
6	31349221	31349485	3wt_3mu_merged_p20_peak_116841b	1889	.	11.1785	188.928	186.327	187	3wt_3mu_merged_p20_peak_116841b	84171.3	1.14843	0.235976	4.86675	1.13449e-06	0.000135869	59741.7	43528.5	53731.5	87924.6	156536	103566
6	32302333	32302399	3wt_3mu_merged_p20_peak_116948	416	.	7.61257	41.6523	39.628	25	3wt_3mu_merged_p20_peak_116948	3857.67	1.70024	0.413572	4.11111	3.93753e-05	0.00271072	2909.06	1281.63	1251.29	4458.36	6961.6	6284.07
6	38927752	38927847	3wt_3mu_merged_p20_peak_117589	648	.	9.78678	64.8683	62.6817	44	3wt_3mu_merged_p20_peak_117589	7223.28	1.12439	0.295182	3.80914	0.000139452	0.0075431	3427.27	5649.77	4552.4	10499.2	11023.9	8187.17
6	39533370	39533590	3wt_3mu_merged_p20_peak_117650a	6715	.	42.2104	671.574	668.4	35	3wt_3mu_merged_p20_peak_117650a	71356.6	1.22163	0.234918	5.20024	1.99026e-07	2.83602e-05	31652.2	50165.9	46676.5	99042.6	122940	77663.1
6	39533370	39533590	3wt_3mu_merged_p20_peak_117650b	8121	.	48.6943	812.185	808.903	143	3wt_3mu_merged_p20_peak_117650b	71356.6	1.22163	0.234918	5.20024	1.99026e-07	2.83602e-05	31652.2	50165.9	46676.5	99042.6	122940	77663.1
6	4255803	4255908	3wt_3mu_merged_p20_peak_113955	1336	.	8.3905	133.628	131.165	64	3wt_3mu_merged_p20_peak_113955	18375.9	2.12572	0.214423	9.9137	3.62949e-23	3.81461e-20	7885.07	6220.04	6445.8	32243.2	28755.1	28706.2
6	42602450	42602531	3wt_3mu_merged_p20_peak_117977	954	.	12.8591	95.4617	93.1285	46	3wt_3mu_merged_p20_peak_117977	6551.07	2.264	0.453028	4.99749	5.80823e-07	7.49099e-05	3762.93	2269.31	732.664	12249.1	13133.5	7158.98
6	52675603	52675783	3wt_3mu_merged_p20_peak_118891	7761	.	37.2663	776.149	772.894	106	3wt_3mu_merged_p20_peak_118891	56361.3	0.829225	0.198108	4.18572	2.84267e-05	0.00209315	37652.8	39865.9	44272.7	62777.2	86351.9	67247.2
6	52723790	52723944	3wt_3mu_merged_p20_peak_118898	10008	.	41.4209	1000.85	997.438	77	3wt_3mu_merged_p20_peak_118898	65062.7	2.03238	0.188511	10.7812	4.2221e-27	6.65618e-24	29438	23645.5	23593.4	95274	113473	104952
6	53533143	53533326	3wt_3mu_merged_p20_peak_118952	1001	.	13.2706	100.122	97.7709	113	3wt_3mu_merged_p20_peak_118952	17340.7	0.883994	0.220992	4.00011	6.33126e-05	0.00398816	14627.7	10893.9	11039.4	22413.5	23075.5	21994.2
6	53549027	53549163	3wt_3mu_merged_p20_peak_118956	1158	.	14.4857	115.846	113.438	75	3wt_3mu_merged_p20_peak_118956	13581	1.01516	0.261398	3.88356	0.000102937	0.00589068	9157.05	8765.67	9047.17	12867.9	18434.4	23214
6	55997170	55997406	3wt_3mu_merged_p20_peak_119172	3484	.	31.6847	348.439	345.584	155	3wt_3mu_merged_p20_peak_119172	43778.1	0.993414	0.199148	4.98832	6.09066e-07	7.80072e-05	33336.4	28901.4	25577.4	50807.1	64098.6	59947.7
6	56353361	56353430	3wt_3mu_merged_p20_peak_119190	332	.	6.61781	33.2237	31.282	31	3wt_3mu_merged_p20_peak_119190	4005.32	3.60204	0.919218	3.91859	8.90682e-05	0.00524925	1425.08	211.646	189.34	5878.54	7507.92	8819.4
6	57477283	57477453	3wt_3mu_merged_p20_peak_119259	5505	.	23.7813	550.549	547.48	59	3wt_3mu_merged_p20_peak_119259	53194.4	1.07896	0.247285	4.36322	1.28163e-05	0.00106956	48900.4	26214.7	27421.4	78363.7	70405.7	67860.2
6	58334490	58334634	3wt_3mu_merged_p20_peak_119358	1084	.	13.9907	108.407	106.024	69	3wt_3mu_merged_p20_peak_119358	14064.5	1.14447	0.266256	4.29839	1.72043e-05	0.00137869	6353.99	9700.44	10232.6	16697.3	17639.3	23763.2
6	58779691	58779847	3wt_3mu_merged_p20_peak_119391a	454	.	8.02406	45.4274	43.3718	35	3wt_3mu_merged_p20_peak_119391a	8304.98	1.04364	0.250042	4.17386	2.99482e-05	0.00217848	5129.13	5673.29	5474.4	9992	12468.1	11092.9
6	58779691	58779847	3wt_3mu_merged_p20_peak_119391b	242	.	5.55512	24.286	22.4498	140	3wt_3mu_merged_p20_peak_119391b	8304.98	1.04364	0.250042	4.17386	2.99482e-05	0.00217848	5129.13	5673.29	5474.4	9992	12468.1	11092.9
6	58974908	58975173	3wt_3mu_merged_p20_peak_119416a	4820	.	20.7358	482.051	479.048	60	3wt_3mu_merged_p20_peak_119416a	134108	1.21994	0.223065	5.46901	4.5256e-08	7.61214e-06	108619	67074.1	65980.9	167982	206722	188273
6	58974908	58975173	3wt_3mu_merged_p20_peak_119416b	9946	.	34.6248	994.698	991.287	188	3wt_3mu_merged_p20_peak_119416b	134108	1.21994	0.223065	5.46901	4.5256e-08	7.61214e-06	108619	67074.1	65980.9	167982	206722	188273
6	7061035	7061178	3wt_3mu_merged_p20_peak_114259	361	.	6.99533	36.1656	34.1914	29	3wt_3mu_merged_p20_peak_114259	7757.34	1.17645	0.278666	4.22172	2.42448e-05	0.0018344	4663.91	5108.9	4503	13649	8714.17	9905.07
6	8142192	8142278	3wt_3mu_merged_p20_peak_114375	851	.	11.9332	85.18	82.8902	48	3wt_3mu_merged_p20_peak_114375	7972.04	1.66618	0.370599	4.49591	6.92716e-06	0.000629383	6471.77	2381.02	2601.37	10996.3	11191.6	14190.2
6	8186665	8186825	3wt_3mu_merged_p20_peak_114386	990	.	8.28005	99.0876	96.7402	92	3wt_3mu_merged_p20_peak_114386	21552.7	0.839066	0.213447	3.93103	8.45842e-05	0.00502854	14150.7	16620.1	15600	32136.7	26834.9	23974
6	8398615	8398701	3wt_3mu_merged_p20_peak_114403	1144	.	14.505	114.42	112.017	36	3wt_3mu_merged_p20_peak_114403	8820.93	1.35985	0.331543	4.10159	4.10324e-05	0.00280365	5647.34	4726.76	4461.84	6816.88	15984.1	15288.7
6	8466669	8466813	3wt_3mu_merged_p20_peak_114407	9469	.	48.8485	946.925	943.547	73	3wt_3mu_merged_p20_peak_114407	53533.9	1.13104	0.180346	6.27152	3.57541e-10	9.6729e-08	31876	35468.3	33340.3	67397.8	80407.2	72713.8
6	9481130	9481248	3wt_3mu_merged_p20_peak_114514	1180	.	14.8136	118.065	115.649	62	3wt_3mu_merged_p20_peak_114514	10759.6	1.38009	0.341317	4.04342	5.26769e-05	0.00344458	2903.17	8800.94	6215.3	15824.9	16054.4	14758.6
7	10548810	10548880	3wt_3mu_merged_p20_peak_120540	808	.	10.7023	80.8551	78.5852	38	3wt_3mu_merged_p20_peak_120540	6538.47	1.35051	0.348496	3.87524	0.000106519	0.0060485	2473.29	3768.47	4815.83	8744.27	12787.3	6641.7
7	10636665	10636741	3wt_3mu_merged_p20_peak_120553	439	.	7.79378	43.9394	41.8971	33	3wt_3mu_merged_p20_peak_120553	4729.01	12.9318	1.22772	10.5332	6.07223e-26	7.97743e-23	0	0	0	8805.14	11764.9	7803.99
7	11413503	11413559	3wt_3mu_merged_p20_peak_120630	624	.	8.99988	62.4033	60.2326	26	3wt_3mu_merged_p20_peak_120630	4500.46	8.44012	1.75244	4.8162	1.4632e-06	0.000169161	76.5541	0	0	8688.48	8881.85	9355.85
7	12160604	12160704	3wt_3mu_merged_p20_peak_120720	690	.	5.23145	69.0633	66.8531	72	3wt_3mu_merged_p20_peak_120720	13344.2	1.04334	0.274776	3.79706	0.000146424	0.0078637	11865.9	6114.21	8174.56	18665.3	16335.7	18909.7
7	12957189	12957263	3wt_3mu_merged_p20_peak_120801	730	.	10.8016	73.0259	70.7942	30	3wt_3mu_merged_p20_peak_120801	5643.67	6.42454	1.41119	4.55256	5.29973e-06	0.000501122	176.663	0	214.037	10778.2	7232.05	15461.1
7	13040294	13040668	3wt_3mu_merged_p20_peak_120812a	1743	.	15.7685	174.337	171.768	61	3wt_3mu_merged_p20_peak_120812a	47404	0.972017	0.2042	4.76012	1.93474e-06	0.000214936	34372.8	35732.9	25923.1	70299.1	56698.9	61397.4
7	13040294	13040668	3wt_3mu_merged_p20_peak_120812b	2354	.	19.3232	235.432	232.742	228	3wt_3mu_merged_p20_peak_120812b	47404	0.972017	0.2042	4.76012	1.93474e-06	0.000214936	34372.8	35732.9	25923.1	70299.1	56698.9	61397.4
7	14348592	14348709	3wt_3mu_merged_p20_peak_120954a	406	.	3.98402	40.6257	38.613	31	3wt_3mu_merged_p20_peak_120954a	14733.5	1.14347	0.211765	5.3997	6.67528e-08	1.07684e-05	9062.83	9853.29	8627.33	19664.5	20105.9	21087.4
7	14348592	14348709	3wt_3mu_merged_p20_peak_120954b	643	.	5.00062	64.3702	62.1875	91	3wt_3mu_merged_p20_peak_120954b	14733.5	1.14347	0.211765	5.3997	6.67528e-08	1.07684e-05	9062.83	9853.29	8627.33	19664.5	20105.9	21087.4
7	15439024	15439104	3wt_3mu_merged_p20_peak_121076	840	.	11.0975	84.0329	81.7495	35	3wt_3mu_merged_p20_peak_121076	7009.47	3.50491	0.319678	10.9639	5.70079e-28	9.50585e-25	1024.65	1516.8	856.147	10544.9	11938	16176.4
7	2082177	2082331	3wt_3mu_merged_p20_peak_119916	862	.	9.84846	86.2535	83.9602	92	3wt_3mu_merged_p20_peak_119916	15250.2	6.62259	1.52251	4.34978	1.36272e-05	0.00112425	459.325	458.566	0	19593.5	39735.7	31254.3
7	2086277	2086400	3wt_3mu_merged_p20_peak_119917	2446	.	21.4116	244.604	241.899	68	3wt_3mu_merged_p20_peak_119917	17926.3	1.55964	0.260589	5.98503	2.16348e-09	4.92364e-07	7095.98	12381.3	7762.95	25350.3	30718.7	24248.6
7	353207	353330	3wt_3mu_merged_p20_peak_119671	799	.	7.02222	79.9668	77.7014	76	3wt_3mu_merged_p20_peak_119671	15812.4	0.788262	0.209953	3.75447	0.00017371	0.00896817	11812.9	12346	10627.7	19060.9	20744.1	20282.7
7	3708740	3708832	3wt_3mu_merged_p20_peak_119932	397	.	7.40682	39.7993	37.7912	65	3wt_3mu_merged_p20_peak_119932	5530.76	13.1576	1.77954	7.39381	1.42681e-13	6.41015e-11	0	0	0	1866.53	15556.8	15761.3
7	38080877	38080984	3wt_3mu_merged_p20_peak_123970	379	.	7.20108	37.9702	35.9788	29	3wt_3mu_merged_p20_peak_123970	5749.07	1.35115	0.35698	3.78496	0.000153733	0.00817815	3627.49	3956.6	2123.9	7268.3	11451.2	6066.93
7	3941622	3941735	3wt_3mu_merged_p20_peak_119942	3162	.	29.5244	316.233	313.42	54	3wt_3mu_merged_p20_peak_119942	18500.8	1.32914	0.218155	6.09267	1.11044e-09	2.73147e-07	9133.49	10588.2	11887.3	24635.1	29669.3	25091.6
7	4076417	4076799	3wt_3mu_merged_p20_peak_119964a	2762	.	25.7628	276.224	273.468	95	3wt_3mu_merged_p20_peak_119964a	53043.4	0.7912	0.193755	4.08351	4.43605e-05	0.00298128	38135.7	45304	33109.8	66307.4	71579.5	63824.1
7	4076417	4076799	3wt_3mu_merged_p20_peak_119964b	2181	.	21.8158	218.152	215.493	164	3wt_3mu_merged_p20_peak_119964b	53043.4	0.7912	0.193755	4.08351	4.43605e-05	0.00298128	38135.7	45304	33109.8	66307.4	71579.5	63824.1
7	42460102	42460329	3wt_3mu_merged_p20_peak_124545a	408	.	6.52392	40.8935	38.8763	16	3wt_3mu_merged_p20_peak_124545a	18829.2	1.0501	0.212215	4.94827	7.48773e-07	9.34167e-05	12660.9	13374.8	10751.2	27440	25655.7	23092.7
7	42460102	42460329	3wt_3mu_merged_p20_peak_124545b	793	.	9.69462	79.385	77.123	110	3wt_3mu_merged_p20_peak_124545b	18829.2	1.0501	0.212215	4.94827	7.48773e-07	9.34167e-05	12660.9	13374.8	10751.2	27440	25655.7	23092.7
7	5209473	5209549	3wt_3mu_merged_p20_peak_120010	2056	.	21.7061	205.661	203.026	30	3wt_3mu_merged_p20_peak_120010	10306.5	1.15699	0.260893	4.43472	9.21905e-06	0.000808895	5894.67	7001.95	6248.23	11412.2	17736.7	13545.2
7	5211655	5211713	3wt_3mu_merged_p20_peak_120011	492	.	8.43555	49.2908	47.2054	30	3wt_3mu_merged_p20_peak_120011	3904.07	2.28901	0.418072	5.47516	4.37111e-08	7.39532e-06	2125.85	1146.42	699.736	7461.04	6339.54	5651.83
7	52153025	52153240	3wt_3mu_merged_p20_peak_125543	2003	.	16.2385	200.348	197.723	119	3wt_3mu_merged_p20_peak_125543	30743.3	0.939073	0.229659	4.08898	4.33271e-05	0.00293055	16724.1	23451.5	23058.3	35474.2	49796.8	35954.6
7	52942297	52942467	3wt_3mu_merged_p20_peak_125674	1468	.	16.4565	146.814	144.314	78	3wt_3mu_merged_p20_peak_125674	16561.6	1.12946	0.231094	4.88746	1.02147e-06	0.000123729	9793.04	10417.7	10965.3	22971.5	27040.4	18181.6
7	53019294	53019466	3wt_3mu_merged_p20_peak_125685a	8811	.	18.5301	881.156	877.823	56	3wt_3mu_merged_p20_peak_125685a	76901.7	0.82931	0.209712	3.95453	7.66864e-05	0.00465747	52103.9	48866.7	65198.9	83801	90944.3	120496
7	53019294	53019466	3wt_3mu_merged_p20_peak_125685b	2022	.	7.3911	202.207	199.579	151	3wt_3mu_merged_p20_peak_125685b	76901.7	0.82931	0.209712	3.95453	7.66864e-05	0.00465747	52103.9	48866.7	65198.9	83801	90944.3	120496
7	54097920	54098099	3wt_3mu_merged_p20_peak_125825	2159	.	18.0864	215.982	213.328	118	3wt_3mu_merged_p20_peak_125825	26766.9	1.1657	0.236094	4.93744	7.9155e-07	9.80482e-05	19851.1	14574.2	15089.6	41484.6	41656	27946.2
7	57089142	57089241	3wt_3mu_merged_p20_peak_126173	2636	.	25.8361	263.664	260.927	49	3wt_3mu_merged_p20_peak_126173	15422.5	1.15556	0.227351	5.08271	3.72088e-07	4.99427e-05	10811.8	10053.2	7795.88	20029.7	22540	21304.5
7	57963932	57964057	3wt_3mu_merged_p20_peak_126232	1460	.	16.4683	146.062	143.564	52	3wt_3mu_merged_p20_peak_126232	14366.7	0.823358	0.218059	3.77585	0.000159464	0.00841302	11530.2	9418.24	10175	18797.1	17293.1	18986.3
7	58357161	58357282	3wt_3mu_merged_p20_peak_126273	752	.	11.0074	75.2002	72.9574	88	3wt_3mu_merged_p20_peak_126273	7426.96	2.95612	0.343538	8.60493	7.63602e-18	5.05423e-15	2632.28	1099.38	1350.08	11741.9	12960.4	14777.8
7	58538615	58538766	3wt_3mu_merged_p20_peak_126274	1421	.	15.6493	142.136	139.649	77	3wt_3mu_merged_p20_peak_126274	17681.4	1.1565	0.28702	4.02935	5.59309e-05	0.00362727	7749.63	14039.2	11064.1	17143.6	31421.8	24670.1
7	5906101	5906314	3wt_3mu_merged_p20_peak_120057	5813	.	10.2167	581.399	578.302	115	3wt_3mu_merged_p20_peak_120057	125093	1.31995	0.298779	4.4178	9.97116e-06	0.000863716	86058.6	87333.3	41251.5	106265	203374	226277
7	5909137	5909545	3wt_3mu_merged_p20_peak_120059a	2758	.	6.15448	275.848	273.093	42	3wt_3mu_merged_p20_peak_120059a	210241	0.753489	0.162829	4.6275	3.70106e-06	0.000369714	154457	148869	166339	254451	270653	266677
7	5909137	5909545	3wt_3mu_merged_p20_peak_120059b	4697	.	8.3438	469.74	466.749	181	3wt_3mu_merged_p20_peak_120059b	210241	0.753489	0.162829	4.6275	3.70106e-06	0.000369714	154457	148869	166339	254451	270653	266677
7	5909137	5909545	3wt_3mu_merged_p20_peak_120059c	1326	.	4.24591	132.655	130.194	317	3wt_3mu_merged_p20_peak_120059c	210241	0.753489	0.162829	4.6275	3.70106e-06	0.000369714	154457	148869	166339	254451	270653	266677
7	59450414	59450475	3wt_3mu_merged_p20_peak_126357	954	.	12.8591	95.4617	93.1285	30	3wt_3mu_merged_p20_peak_126357	5141.55	2.29587	0.429461	5.34593	8.99538e-08	1.39394e-05	2479.18	1575.59	1160.74	13846.8	7329.42	4457.6
7	5960560	5960873	3wt_3mu_merged_p20_peak_120066a	11599	.	25.0368	1160	1156.48	100	3wt_3mu_merged_p20_peak_120066a	155947	1.24554	0.297645	4.18466	2.85592e-05	0.00209906	118182	109850	49516.6	141907	249909	266319
7	5960560	5960873	3wt_3mu_merged_p20_peak_120066b	971	.	5.2772	97.1065	94.7671	259	3wt_3mu_merged_p20_peak_120066b	155947	1.24554	0.297645	4.18466	2.85592e-05	0.00209906	118182	109850	49516.6	141907	249909	266319
7	5965494	5965631	3wt_3mu_merged_p20_peak_120067	10532	.	23.3205	1053.26	1049.81	56	3wt_3mu_merged_p20_peak_120067	81738	1.47871	0.307735	4.80513	1.5465e-06	0.000177725	65418.4	43828.3	20242.9	102623	134147	124168
7	5977497	5977929	3wt_3mu_merged_p20_peak_120073a	25919	.	39.8429	2591.92	2587.47	95	3wt_3mu_merged_p20_peak_120073a	279034	0.878256	0.213544	4.11277	3.90946e-05	0.00269567	172176	210223	207492	258864	409733	415713
7	5977497	5977929	3wt_3mu_merged_p20_peak_120073b	430	.	3.35366	43.0313	40.9967	248	3wt_3mu_merged_p20_peak_120073b	279034	0.878256	0.213544	4.11277	3.90946e-05	0.00269567	172176	210223	207492	258864	409733	415713
7	5977497	5977929	3wt_3mu_merged_p20_peak_120073c	1485	.	6.17934	148.593	146.088	371	3wt_3mu_merged_p20_peak_120073c	279034	0.878256	0.213544	4.11277	3.90946e-05	0.00269567	172176	210223	207492	258864	409733	415713
7	62753778	62753938	3wt_3mu_merged_p20_peak_126680a	1180	.	14.8136	118.065	115.649	33	3wt_3mu_merged_p20_peak_126680a	13055.2	1.5766	0.313128	5.03499	4.77869e-07	6.27328e-05	6913.43	7678.04	5071.02	12695.4	28928.2	17044.9
7	62753778	62753938	3wt_3mu_merged_p20_peak_126680b	416	.	7.61257	41.6523	39.628	130	3wt_3mu_merged_p20_peak_126680b	13055.2	1.5766	0.313128	5.03499	4.77869e-07	6.27328e-05	6913.43	7678.04	5071.02	12695.4	28928.2	17044.9
7	6340685	6341122	3wt_3mu_merged_p20_peak_120084a	1107	.	7.6473	110.712	108.322	98	3wt_3mu_merged_p20_peak_120084a	80349.5	0.996977	0.169023	5.89846	3.6692e-09	7.95373e-07	53564.3	51218.3	56143.5	103288	105798	112085
7	6340685	6341122	3wt_3mu_merged_p20_peak_120084b	3636	.	15.9849	363.609	360.736	260	3wt_3mu_merged_p20_peak_120084b	80349.5	0.996977	0.169023	5.89846	3.6692e-09	7.95373e-07	53564.3	51218.3	56143.5	103288	105798	112085
7	6340685	6341122	3wt_3mu_merged_p20_peak_120084c	2147	.	11.266	214.775	212.123	383	3wt_3mu_merged_p20_peak_120084c	80349.5	0.996977	0.169023	5.89846	3.6692e-09	7.95373e-07	53564.3	51218.3	56143.5	103288	105798	112085
7	6438239	6438414	3wt_3mu_merged_p20_peak_120108a	1627	.	12.6644	162.742	160.2	28	3wt_3mu_merged_p20_peak_120108a	24255.6	1.12111	0.205815	5.44719	5.11722e-08	8.5375e-06	15776	15503.1	14554.5	31249.1	38767.5	29683.3
7	6438239	6438414	3wt_3mu_merged_p20_peak_120108b	900	.	8.73473	90.0855	87.7748	123	3wt_3mu_merged_p20_peak_120108b	24255.6	1.12111	0.205815	5.44719	5.11722e-08	8.5375e-06	15776	15503.1	14554.5	31249.1	38767.5	29683.3
7	64598279	64598408	3wt_3mu_merged_p20_peak_126823	4326	.	10.3618	432.667	429.715	79	3wt_3mu_merged_p20_peak_126823	59137.8	0.837015	0.202952	4.12419	3.72035e-05	0.00258896	49760.2	38672.4	38905.3	65734.2	73234.7	88519.7
7	64598547	64598620	3wt_3mu_merged_p20_peak_126824	2203	.	6.92209	220.322	217.66	37	3wt_3mu_merged_p20_peak_126824	23621.7	1.77633	0.32922	5.39555	6.83124e-08	1.09893e-05	18178.7	6660.97	7178.46	40576.7	30945.8	38189.7
7	64599002	64599151	3wt_3mu_merged_p20_peak_126825a	1270	.	5.0405	127.012	124.568	20	3wt_3mu_merged_p20_peak_126825a	39479.5	1.21335	0.225665	5.3768	7.58224e-08	1.20631e-05	31322.4	20476.7	19567.9	57121.8	50905.7	57482.6
7	64599002	64599151	3wt_3mu_merged_p20_peak_126825b	2924	.	7.9597	292.443	289.664	108	3wt_3mu_merged_p20_peak_126825b	39479.5	1.21335	0.225665	5.3768	7.58224e-08	1.20631e-05	31322.4	20476.7	19567.9	57121.8	50905.7	57482.6
7	6464228	6464342	3wt_3mu_merged_p20_peak_120119	1553	.	4.06529	155.343	152.82	33	3wt_3mu_merged_p20_peak_120119	48590	1.79588	0.200972	8.93598	4.03593e-19	2.92843e-16	21653	22146.4	21387.2	60393.3	88028.8	77931.4
7	6465966	6466336	3wt_3mu_merged_p20_peak_120120a	942	.	3.78378	94.2373	91.9101	40	3wt_3mu_merged_p20_peak_120120a	234348	1.11346	0.202505	5.49845	3.83138e-08	6.55897e-06	126727	153802	163927	248786	351812	361034
7	6465966	6466336	3wt_3mu_merged_p20_peak_120120b	1418	.	4.60362	141.815	139.328	116	3wt_3mu_merged_p20_peak_120120b	234348	1.11346	0.202505	5.49845	3.83138e-08	6.55897e-06	126727	153802	163927	248786	351812	361034
7	6465966	6466336	3wt_3mu_merged_p20_peak_120120c	13955	.	17.8267	1395.53	1391.86	278	3wt_3mu_merged_p20_peak_120120c	234348	1.11346	0.202505	5.49845	3.83138e-08	6.55897e-06	126727	153802	163927	248786	351812	361034
7	6466634	6466732	3wt_3mu_merged_p20_peak_120121	1632	.	4.97664	163.28	160.738	51	3wt_3mu_merged_p20_peak_120121	31026.6	1.53808	0.212619	7.23399	4.69017e-13	2.01824e-10	13508.9	16884.6	17295.8	47723.2	52263.4	38483.5
7	6614654	6614744	3wt_3mu_merged_p20_peak_120137	851	.	11.9332	85.18	82.8902	65	3wt_3mu_merged_p20_peak_120137	6772.84	2.23611	0.335834	6.65837	2.76886e-11	9.09403e-09	3497.93	1499.16	2115.67	10519.5	11835.3	11169.5
7	6652774	6653032	3wt_3mu_merged_p20_peak_120139	7438	.	40.8129	743.851	740.62	143	3wt_3mu_merged_p20_peak_120139	63674.2	1.26368	0.186127	6.78932	1.12664e-11	3.93115e-09	41716.1	32946.2	37670.5	97089.8	90387.2	82235.7
7	6667795	6667870	3wt_3mu_merged_p20_peak_120144	989	.	13.1677	98.9522	96.6051	33	3wt_3mu_merged_p20_peak_120144	7429.73	1.36977	0.326017	4.20152	2.65128e-05	0.00197582	2349.62	5144.17	4947.54	10747.7	10596.6	10792.8
7	66838849	66838933	3wt_3mu_merged_p20_peak_127029	593	.	9.46427	59.3084	57.1547	39	3wt_3mu_merged_p20_peak_127029	6521.01	1.2578	0.275536	4.56493	4.99672e-06	0.000476367	3780.6	3715.56	4042	7608.13	10445.1	9534.66
7	66868751	66868803	3wt_3mu_merged_p20_peak_127031	472	.	7.7326	47.2533	45.1857	29	3wt_3mu_merged_p20_peak_127031	3669.39	1.5481	0.358594	4.31713	1.58068e-05	0.00127852	2214.18	1804.87	1588.81	4823.55	7140.1	4444.83
7	67252042	67252153	3wt_3mu_merged_p20_peak_127051	2423	.	24.3808	242.334	239.632	50	3wt_3mu_merged_p20_peak_127051	14930.6	1.1007	0.244178	4.50777	6.55124e-06	0.00060302	10947.2	10517.6	7013.82	19831.8	21609.6	19663.2
7	6753936	6754073	3wt_3mu_merged_p20_peak_120154	3865	.	18.5305	386.579	383.678	49	3wt_3mu_merged_p20_peak_120154	49030.6	0.837382	0.219694	3.81158	0.000138084	0.00748312	35303.2	36420.7	33834.3	45882.1	65699.7	77043.7
7	6842250	6842691	3wt_3mu_merged_p20_peak_120166a	894	.	8.21397	89.4435	87.136	77	3wt_3mu_merged_p20_peak_120166a	54039	1.03318	0.215939	4.78462	1.71314e-06	0.000194047	38524.4	33222.5	34682.2	83562.6	80802.1	53440.1
7	6842250	6842691	3wt_3mu_merged_p20_peak_120166b	1249	.	10.086	125	122.562	234	3wt_3mu_merged_p20_peak_120166b	54039	1.03318	0.215939	4.78462	1.71314e-06	0.000194047	38524.4	33222.5	34682.2	83562.6	80802.1	53440.1
7	6915563	6915657	3wt_3mu_merged_p20_peak_120174	3593	.	32.4049	359.314	356.446	52	3wt_3mu_merged_p20_peak_120174	15924.9	7.928	0.702161	11.2909	1.45601e-29	3.15619e-26	58.8878	58.7905	279.894	30391.9	32790.4	31969.5
7	7276111	7276173	3wt_3mu_merged_p20_peak_120206	345	.	5.78975	34.5082	32.551	30	3wt_3mu_merged_p20_peak_120206	4271.01	1.84646	0.430929	4.28484	1.82867e-05	0.0014454	2897.28	1904.81	765.593	7415.39	6090.72	6552.29
7	7279337	7279437	3wt_3mu_merged_p20_peak_120207	3684	.	31.1509	368.479	365.6	49	3wt_3mu_merged_p20_peak_120207	21256.2	1.27468	0.284394	4.4821	7.39121e-06	0.00066481	9109.94	16872.9	11311	20699.2	36463.2	33080.8
7	73382655	73382901	3wt_3mu_merged_p20_peak_127714a	578	.	8.62488	57.8073	55.6643	42	3wt_3mu_merged_p20_peak_127714a	19308.8	0.775259	0.206456	3.75508	0.000173288	0.00895974	13438.2	15450.1	13838.3	26496.6	24444	22185.8
7	73382655	73382901	3wt_3mu_merged_p20_peak_127714b	972	.	11.771	97.2551	94.9153	127	3wt_3mu_merged_p20_peak_127714b	19308.8	0.775259	0.206456	3.75508	0.000173288	0.00895974	13438.2	15450.1	13838.3	26496.6	24444	22185.8
7	7540250	7540312	3wt_3mu_merged_p20_peak_120242	250	.	5.20063	25.0511	23.2091	48	3wt_3mu_merged_p20_peak_120242	3126.42	1.80655	0.437718	4.1272	3.67201e-05	0.00256462	1719.52	1328.67	1119.58	2718.64	7459.24	4412.9
7	771100	771195	3wt_3mu_merged_p20_peak_119801	1559	.	17.8998	155.917	153.392	58	3wt_3mu_merged_p20_peak_119801	11043	2.09611	0.262329	7.99038	1.34524e-15	7.42949e-13	3344.83	4609.18	4610.02	18741.3	20608.9	14343.5
7	7764260	7764437	3wt_3mu_merged_p20_peak_120265	19067	.	51.6946	1906.8	1902.8	86	3wt_3mu_merged_p20_peak_120265	145473	0.988036	0.200874	4.91869	8.71234e-07	0.000107077	113388	104118	75036.3	175164	206343	198785
7	7786231	7786518	3wt_3mu_merged_p20_peak_120274a	2340	.	20.9792	234.081	231.393	37	3wt_3mu_merged_p20_peak_120274a	33548.7	1.26096	0.232259	5.42912	5.66334e-08	9.26925e-06	25080.3	16725.9	17452.2	39663.7	56152.5	46217.3
7	7786231	7786518	3wt_3mu_merged_p20_peak_120274b	1446	.	15.0645	144.63	142.136	112	3wt_3mu_merged_p20_peak_120274b	33548.7	1.26096	0.232259	5.42912	5.66334e-08	9.26925e-06	25080.3	16725.9	17452.2	39663.7	56152.5	46217.3
7	7786231	7786518	3wt_3mu_merged_p20_peak_120274c	307	.	5.84858	30.7337	28.8199	260	3wt_3mu_merged_p20_peak_120274c	33548.7	1.26096	0.232259	5.42912	5.66334e-08	9.26925e-06	25080.3	16725.9	17452.2	39663.7	56152.5	46217.3
7	8275358	8275487	3wt_3mu_merged_p20_peak_120287a	272	.	5.12783	27.2529	25.3803	48	3wt_3mu_merged_p20_peak_120287a	7912.57	2.0212	0.355679	5.68265	1.32624e-08	2.58998e-06	4192.81	3550.95	1629.97	9231.19	14469.5	14401
7	8275358	8275487	3wt_3mu_merged_p20_peak_120287b	334	.	5.75049	33.4964	31.553	100	3wt_3mu_merged_p20_peak_120287b	7912.57	2.0212	0.355679	5.68265	1.32624e-08	2.58998e-06	4192.81	3550.95	1629.97	9231.19	14469.5	14401
7	8343740	8343881	3wt_3mu_merged_p20_peak_120294	5626	.	35.5671	562.63	559.55	93	3wt_3mu_merged_p20_peak_120294	37818.8	1.12975	0.257765	4.38287	1.17124e-05	0.000994603	21535.3	29930.3	19699.6	34748.8	62692.2	58306.4
7	8654231	8654356	3wt_3mu_merged_p20_peak_120322	984	.	12.8895	98.4297	96.0853	67	3wt_3mu_merged_p20_peak_120322	12746.6	1.13391	0.294183	3.85443	0.000116001	0.00648916	9204.16	7866.17	6865.64	10692	22118.1	19733.5
7	9882133	9882192	3wt_3mu_merged_p20_peak_120469	370	.	7.09821	37.0648	35.0819	29	3wt_3mu_merged_p20_peak_120469	3372.75	12.444	1.23909	10.0429	9.87499e-24	1.0878e-20	0	0	0	5310.47	7735.11	7190.91
8	1118306	1118451	3wt_3mu_merged_p20_peak_127974	7953	.	49.0592	795.381	792.111	71	3wt_3mu_merged_p20_peak_127974	51241.9	1.27789	0.30544	4.18376	2.86724e-05	0.002106	44430.8	21288	24046.2	43285.2	91820.6	82580.5
8	11844238	11844505	3wt_3mu_merged_p20_peak_129106	8350	.	35.3728	835.082	831.783	213	3wt_3mu_merged_p20_peak_129106	105302	1.16829	0.264308	4.42019	9.86143e-06	0.000856092	38595.1	71524.5	84445.7	113696	165921	157632
8	14692514	14692583	3wt_3mu_merged_p20_peak_129353	564	.	7.63335	56.4079	54.2731	36	3wt_3mu_merged_p20_peak_129353	5429.72	1.9557	0.403062	4.85211	1.22156e-06	0.000144698	1377.97	3844.9	1448.86	7785.65	10023.2	8097.76
8	14703237	14703321	3wt_3mu_merged_p20_peak_129356	644	.	9.97864	64.4963	62.3112	27	3wt_3mu_merged_p20_peak_129356	6304.62	1.96753	0.330866	5.9466	2.73769e-09	6.04019e-07	3138.72	2933.65	1621.74	8384.15	12138.2	9611.3
8	17529468	17529560	3wt_3mu_merged_p20_peak_129733	335	.	6.68672	33.5063	31.559	29	3wt_3mu_merged_p20_peak_129733	4766.35	2.65267	0.349508	7.5897	3.20636e-14	1.59322e-11	1531.08	1569.71	814.986	8881.22	8865.62	6935.46
8	17668516	17668579	3wt_3mu_merged_p20_peak_129754	204	.	5.04075	20.4014	18.6238	4	3wt_3mu_merged_p20_peak_129754	2770.27	1.69068	0.442587	3.81999	0.000133456	0.00728697	736.097	1510.92	1687.6	2982.39	5387.53	4317.1
8	18182641	18182744	3wt_3mu_merged_p20_peak_129805	818	.	11.6246	81.8187	79.5442	45	3wt_3mu_merged_p20_peak_129805	8015.54	1.34642	0.308508	4.36428	1.27542e-05	0.00106746	2844.28	5220.6	5515.56	10747.7	13106.4	10658.6
8	18200209	18200320	3wt_3mu_merged_p20_peak_129808	2536	.	22.951	253.625	250.905	50	3wt_3mu_merged_p20_peak_129808	17171.1	1.48773	0.356938	4.16804	3.07235e-05	0.00222091	4834.69	11587.6	10660.7	13430.9	34802.6	27709.9
8	1839537	1839779	3wt_3mu_merged_p20_peak_128061a	3716	.	16.6093	371.671	368.787	69	3wt_3mu_merged_p20_peak_128061a	73586.9	1.97415	0.260865	7.56769	3.79907e-14	1.85583e-11	27482.9	26373.4	35727.7	74417.6	163097	114422
8	1839537	1839779	3wt_3mu_merged_p20_peak_128061b	4290	.	18.3494	429.082	426.134	132	3wt_3mu_merged_p20_peak_128061b	73586.9	1.97415	0.260865	7.56769	3.79907e-14	1.85583e-11	27482.9	26373.4	35727.7	74417.6	163097	114422
8	18912784	18912887	3wt_3mu_merged_p20_peak_129874	1866	.	20.1052	186.643	184.047	43	3wt_3mu_merged_p20_peak_129874	11950.6	1.22828	0.224049	5.4822	4.20064e-08	7.1208e-06	6789.76	7719.2	6939.73	17853.7	15816.4	16585.1
8	18913356	18913441	3wt_3mu_merged_p20_peak_129875	388	.	7.30395	38.8817	36.8819	64	3wt_3mu_merged_p20_peak_129875	4570.28	1.20619	0.320308	3.76572	0.000166067	0.00868403	2620.51	2316.35	3358.73	6614	5365.89	7146.21
8	22478023	22478100	3wt_3mu_merged_p20_peak_130318	370	.	7.09821	37.0648	35.0819	37	3wt_3mu_merged_p20_peak_130318	4301.01	25.372	3.90682	6.49429	8.34286e-11	2.52053e-08	0	0	0	0	14923.9	10882.2
8	22492485	22492653	3wt_3mu_merged_p20_peak_130319	1494	.	17.3855	149.441	146.934	64	3wt_3mu_merged_p20_peak_130319	18751.8	14.919	2.72757	5.46973	4.50724e-08	7.60492e-06	0	0	0	223.172	61031.6	51256
8	22492920	22492980	3wt_3mu_merged_p20_peak_130320	435	.	7.81831	43.5285	41.4884	30	3wt_3mu_merged_p20_peak_130320	3723.06	25.7426	3.90683	6.58914	4.42368e-11	1.39988e-08	0	0	0	0	12024.6	10313.8
8	22754188	22754314	3wt_3mu_merged_p20_peak_130375	697	.	10.493	69.7953	67.5807	45	3wt_3mu_merged_p20_peak_130375	10016.8	1.12704	0.276291	4.07917	4.51963e-05	0.0030285	4575.58	8060.18	6239.99	15216.3	13447.2	12561.7
8	23194137	23194392	3wt_3mu_merged_p20_peak_130455	9028	.	58.688	902.833	899.485	92	3wt_3mu_merged_p20_peak_130455	64037.5	1.34631	0.239395	5.62379	1.86818e-08	3.5024e-06	39172.2	38260.9	31018.9	62914.1	119927	92932.6
8	23344761	23344934	3wt_3mu_merged_p20_peak_130490	920	.	12.5505	92.0023	89.6832	49	3wt_3mu_merged_p20_peak_130490	12966.5	1.474	0.297553	4.95374	7.2799e-07	9.12836e-05	5588.45	6137.73	8874.29	12791.8	25190.5	19216.2
8	23685716	23685773	3wt_3mu_merged_p20_peak_130544	818	.	11.6246	81.8187	79.5442	25	3wt_3mu_merged_p20_peak_130544	4732.76	5.69384	1.1868	4.79763	1.60556e-06	0.000183178	58.8878	452.687	24.6965	4235.19	12679.1	10946
8	2438519	2438676	3wt_3mu_merged_p20_peak_128125	9153	.	31.3204	915.385	912.029	75	3wt_3mu_merged_p20_peak_128125	66470.4	0.686285	0.178399	3.84691	0.000119615	0.006657	45573.3	53646.3	53640.9	87432.6	79244.3	79285.2
8	2467170	2467415	3wt_3mu_merged_p20_peak_128129	5979	.	47.3214	597.948	594.836	102	3wt_3mu_merged_p20_peak_128129	40470.6	2.11208	0.210601	10.0288	1.13883e-23	1.24209e-20	12083.8	16614.2	16925.4	59911.5	74365.2	62923.7
8	2471752	2471809	3wt_3mu_merged_p20_peak_128130	250	.	5.65799	25.0873	23.24	25	3wt_3mu_merged_p20_peak_128130	2726.19	12.1373	1.25206	9.69386	3.20186e-22	2.96928e-19	0	0	0	7024.84	4938.57	4393.74
8	25043480	25043583	3wt_3mu_merged_p20_peak_130685	1114	.	13.3754	111.436	109.043	57	3wt_3mu_merged_p20_peak_130685	10231.7	1.49517	0.351455	4.25423	2.09772e-05	0.00162329	3209.38	5579.22	7293.71	11052.1	22345.3	11910.3
8	2506286	2506484	3wt_3mu_merged_p20_peak_128134	9085	.	54.1954	908.593	905.241	88	3wt_3mu_merged_p20_peak_128134	59169.1	1.42612	0.236757	6.02354	1.70646e-09	3.96685e-07	25315.9	32176.1	38798.3	63127.2	104478	91118.9
8	25151354	25151479	3wt_3mu_merged_p20_peak_130700	1354	.	16.2539	135.423	132.954	39	3wt_3mu_merged_p20_peak_130700	11204.6	1.72684	0.377442	4.57513	4.75933e-06	0.000457001	2820.72	5743.83	7038.52	8703.7	20511.6	22409.3
8	2592362	2592419	3wt_3mu_merged_p20_peak_128145	697	.	3.78815	69.7224	67.5096	33	3wt_3mu_merged_p20_peak_128145	11678.1	1.64114	0.341221	4.80962	1.51218e-06	0.000174127	8574.06	5373.45	3054.14	22449	16038.2	14579.8
8	2592694	2592796	3wt_3mu_merged_p20_peak_128146	902	.	4.28247	90.2114	87.9002	50	3wt_3mu_merged_p20_peak_128146	24417	3.22607	0.28085	11.4868	1.53656e-30	3.50611e-27	3256.49	6049.54	4840.52	56548.7	44890.7	30915.8
8	26818390	26818509	3wt_3mu_merged_p20_peak_130941	361	.	6.99533	36.1656	34.1914	64	3wt_3mu_merged_p20_peak_130941	7288.55	1.4286	0.367007	3.89256	9.91913e-05	0.00571664	2278.96	3909.57	5663.74	6887.89	13036.1	11955.1
8	27437223	27437310	3wt_3mu_merged_p20_peak_131018	206	.	4.92173	20.6305	18.851	3	3wt_3mu_merged_p20_peak_131018	3797.37	1.47303	0.357555	4.11971	3.79346e-05	0.00263139	2402.62	1540.31	2090.97	5391.62	4397.65	6961.01
8	2776663	2776804	3wt_3mu_merged_p20_peak_128166	1703	.	19.0314	170.379	167.82	47	3wt_3mu_merged_p20_peak_128166	15641.6	1.19437	0.24069	4.96227	6.96729e-07	8.81926e-05	9133.49	9929.72	9475.24	16874.8	26889	21547.2
8	28629605	28629740	3wt_3mu_merged_p20_peak_131193	762	.	11.1102	76.2934	74.0452	79	3wt_3mu_merged_p20_peak_131193	10711.4	7.65389	1.39493	5.48694	4.08964e-08	6.95985e-06	194.33	0	123.483	11909.3	31005.3	21036.3
8	2923456	2923542	3wt_3mu_merged_p20_peak_128180	436	.	6.97034	43.6135	41.5729	29	3wt_3mu_merged_p20_peak_128180	5841.2	2.04301	0.392999	5.19852	2.00884e-07	2.8578e-05	2496.84	1846.02	2502.58	5117.73	15426.9	7657.11
8	2938719	2938793	3wt_3mu_merged_p20_peak_128184	236	.	5.22444	23.6854	21.859	30	3wt_3mu_merged_p20_peak_128184	3744.19	12.5948	1.23241	10.2197	1.61823e-24	1.9221e-21	0	0	0	6558.2	8633.03	7273.93
8	2971735	2971813	3wt_3mu_merged_p20_peak_128193	2786	.	13.8774	278.687	275.927	36	3wt_3mu_merged_p20_peak_128193	19410.6	1.29709	0.22583	5.74364	9.26618e-09	1.86849e-06	10635.1	10059.1	12998.6	23291	31897.8	27582.2
8	30600411	30600582	3wt_3mu_merged_p20_peak_131436a	6264	.	40.4142	626.463	623.326	45	3wt_3mu_merged_p20_peak_131436a	60395.2	0.803258	0.18497	4.34263	1.40786e-05	0.0011549	42151.9	44786.6	45071.2	65749.4	84566.9	80045.2
8	30600411	30600582	3wt_3mu_merged_p20_peak_131436b	8201	.	49.4024	820.159	816.871	100	3wt_3mu_merged_p20_peak_131436b	60395.2	0.803258	0.18497	4.34263	1.40786e-05	0.0011549	42151.9	44786.6	45071.2	65749.4	84566.9	80045.2
8	30779054	30779214	3wt_3mu_merged_p20_peak_131447	2394	.	24.175	239.467	236.771	78	3wt_3mu_merged_p20_peak_131447	21667.3	1.23019	0.243972	5.04235	4.5985e-07	6.05508e-05	9963.81	15244.4	13649	31122.3	35743.8	24280.5
8	35045402	35045454	3wt_3mu_merged_p20_peak_131995	333	.	3.62551	33.3319	31.3895	25	3wt_3mu_merged_p20_peak_131995	5530.96	1.1884	0.3047	3.90023	9.61004e-05	0.00556439	4075.03	2898.37	3144.69	6340.1	7837.88	8889.65
8	35045529	35045617	3wt_3mu_merged_p20_peak_131996	611	.	4.82959	61.1736	59.01	29	3wt_3mu_merged_p20_peak_131996	12738.8	1.4292	0.242013	5.90546	3.5167e-09	7.66146e-07	7784.96	6020.15	6890.34	16758.2	16876.6	22102.8
8	35047269	35047327	3wt_3mu_merged_p20_peak_131999	1211	.	5.92975	121.132	118.706	28	3wt_3mu_merged_p20_peak_131999	11899.7	0.932922	0.244421	3.81687	0.000135155	0.0073658	7873.3	9435.88	7227.86	13157	15994.9	17709.1
8	35197952	35198047	3wt_3mu_merged_p20_peak_132017	557	.	8.77526	55.7252	53.5956	58	3wt_3mu_merged_p20_peak_132017	6338.44	1.97586	0.409279	4.82765	1.38153e-06	0.000161007	3179.94	3392.21	1127.81	7283.51	14393.8	8653.36
8	36003115	36003190	3wt_3mu_merged_p20_peak_132100	773	.	11.2131	77.3906	75.1371	38	3wt_3mu_merged_p20_peak_132100	6292.08	1.06132	0.276604	3.83697	0.000124562	0.00688588	4634.47	3668.53	3926.75	9545.66	8032.61	7944.49
8	36125823	36125914	3wt_3mu_merged_p20_peak_132103	1366	.	16.3567	136.684	134.212	43	3wt_3mu_merged_p20_peak_132103	11019.4	0.98256	0.26051	3.77168	0.000162155	0.00851614	8356.18	6631.57	7227.86	11457.8	17990.9	14452.1
8	36507387	36507593	3wt_3mu_merged_p20_peak_132110a	219	.	5.2465	21.9303	20.1286	27	3wt_3mu_merged_p20_peak_132110a	11786.5	0.980714	0.228836	4.28566	1.82195e-05	0.00144074	6925.2	8095.45	8767.27	16088.6	15291.7	15550.5
8	36507387	36507593	3wt_3mu_merged_p20_peak_132110b	463	.	8.12693	46.3852	44.322	146	3wt_3mu_merged_p20_peak_132110b	11786.5	0.980714	0.228836	4.28566	1.82195e-05	0.00144074	6925.2	8095.45	8767.27	16088.6	15291.7	15550.5
8	36591114	36591214	3wt_3mu_merged_p20_peak_132122	840	.	11.8303	84.0558	81.771	45	3wt_3mu_merged_p20_peak_132122	9320.41	1.79359	0.274335	6.53794	6.23719e-11	1.91439e-08	3615.71	3562.71	5350.92	13501.9	16844.1	13047.1
8	36655841	36656062	3wt_3mu_merged_p20_peak_132135a	938	.	10.876	93.8853	91.5592	91	3wt_3mu_merged_p20_peak_132135a	21415.3	1.28548	0.273168	4.70583	2.5283e-06	0.00026751	11123.9	11399.5	14859.1	19030.5	37880.4	34198.3
8	36655841	36656062	3wt_3mu_merged_p20_peak_132135b	565	.	7.93538	56.5032	54.368	183	3wt_3mu_merged_p20_peak_132135b	21415.3	1.28548	0.273168	4.70583	2.5283e-06	0.00026751	11123.9	11399.5	14859.1	19030.5	37880.4	34198.3
8	3715167	3715245	3wt_3mu_merged_p20_peak_128281	1060	.	13.7849	106.024	103.65	35	3wt_3mu_merged_p20_peak_128281	7570.74	1.14945	0.276167	4.16214	3.15274e-05	0.00225737	4027.92	5008.95	5079.26	8358.79	12035.4	10914.1
8	37249756	37249838	3wt_3mu_merged_p20_peak_132200	1088	.	9.88968	108.884	106.5	42	3wt_3mu_merged_p20_peak_132200	10573.3	1.63445	0.413422	3.95347	7.7025e-05	0.00467041	2061.07	5638.01	7762.95	8602.25	20197.8	19177.9
8	3738424	3738547	3wt_3mu_merged_p20_peak_128285	1226	.	10.682	122.68	120.25	67	3wt_3mu_merged_p20_peak_128285	16222.9	1.11752	0.260048	4.29737	1.72839e-05	0.00138379	12313.4	11240.7	7145.53	24782.2	23086.3	18769.2
8	37461778	37461898	3wt_3mu_merged_p20_peak_132223	2140	.	22.3233	214.007	211.356	52	3wt_3mu_merged_p20_peak_132223	15566.9	1.18696	0.31818	3.73046	0.000191128	0.00964459	6984.09	6173	15361.3	20496.3	23567.7	20819.2
8	37959090	37959341	3wt_3mu_merged_p20_peak_132242a	352	.	6.89246	35.2727	33.3073	29	3wt_3mu_merged_p20_peak_132242a	23062.3	0.992656	0.212101	4.68011	2.8672e-06	0.000296847	17866.6	12716.4	15698.8	30118	30253.5	31720.5
8	37959090	37959341	3wt_3mu_merged_p20_peak_132242b	2126	.	22.2205	212.611	209.962	203	3wt_3mu_merged_p20_peak_132242b	23062.3	0.992656	0.212101	4.68011	2.8672e-06	0.000296847	17866.6	12716.4	15698.8	30118	30253.5	31720.5
8	38213883	38213995	3wt_3mu_merged_p20_peak_132270	481	.	7.48802	48.1106	46.0361	38	3wt_3mu_merged_p20_peak_132270	7760.79	1.08401	0.276898	3.91482	9.04707e-05	0.00530933	6206.77	4033.03	4684.11	10656.4	11424.2	9560.21
8	38352102	38352244	3wt_3mu_merged_p20_peak_132282	931	.	12.6533	93.1519	90.8281	110	3wt_3mu_merged_p20_peak_132282	11522.9	2.5553	0.628893	4.06317	4.84108e-05	0.00320306	2326.07	1993	5737.83	9885.49	24703.7	24491.3
8	38404536	38404612	3wt_3mu_merged_p20_peak_132289	506	.	8.24307	50.6113	48.5171	39	3wt_3mu_merged_p20_peak_132289	5361.66	1.15481	0.310223	3.72253	0.000197238	0.00988275	3480.27	2886.61	3605.7	6203.16	9422.77	6571.45
8	38480751	38480811	3wt_3mu_merged_p20_peak_132297	570	.	4.55837	57.0268	54.8893	30	3wt_3mu_merged_p20_peak_132297	8297.62	1.36482	0.358166	3.81057	0.000138645	0.00750884	3003.28	6178.88	4741.74	6801.66	15470.2	13589.9
8	39053680	39053982	3wt_3mu_merged_p20_peak_132317a	299	.	3.84787	29.9875	28.0828	16	3wt_3mu_merged_p20_peak_132317a	207773	1.98466	0.247854	8.00737	1.17184e-15	6.5133e-13	49218.4	98644.6	103602	317578	331263	346332
8	39053680	39053982	3wt_3mu_merged_p20_peak_132317b	21205	.	58.4613	2120.52	2116.39	171	3wt_3mu_merged_p20_peak_132317b	207773	1.98466	0.247854	8.00737	1.17184e-15	6.5133e-13	49218.4	98644.6	103602	317578	331263	346332
8	39292685	39292792	3wt_3mu_merged_p20_peak_132321	1279	.	15.6366	127.915	125.469	57	3wt_3mu_merged_p20_peak_132321	12066	4.54488	0.36746	12.3684	3.87553e-35	1.40016e-31	594.767	723.123	1671.13	15125	25320.3	28961.6
8	39594184	39594352	3wt_3mu_merged_p20_peak_132344a	350	.	6.1392	35.0315	33.0711	24	3wt_3mu_merged_p20_peak_132344a	13144.5	1.10785	0.237396	4.66666	3.06134e-06	0.000313207	7561.19	8806.82	8627.33	14749.6	18277.6	20844.7
8	39594184	39594352	3wt_3mu_merged_p20_peak_132344b	666	.	9.04651	66.6201	64.4229	130	3wt_3mu_merged_p20_peak_132344b	13144.5	1.10785	0.237396	4.66666	3.06134e-06	0.000313207	7561.19	8806.82	8627.33	14749.6	18277.6	20844.7
8	39637544	39637686	3wt_3mu_merged_p20_peak_132352	1611	.	18.3113	161.142	158.605	103	3wt_3mu_merged_p20_peak_132352	16560.9	0.941114	0.216254	4.3519	1.34963e-05	0.00111558	10641	12428.3	10957	19086.3	22961.9	23290.6
8	398937	398991	3wt_3mu_merged_p20_peak_127920	290	.	4.9357	29.059	27.1649	25	3wt_3mu_merged_p20_peak_127920	3652.54	1.53683	0.393438	3.90614	9.37803e-05	0.00545738	1613.53	1293.39	2716.62	4047.52	6177.27	6066.93
8	399053	399221	3wt_3mu_merged_p20_peak_127921	933	.	9.63832	93.36	91.0355	82	3wt_3mu_merged_p20_peak_127921	18591.6	1.47733	0.286153	5.16274	2.43361e-07	3.4007e-05	13644.3	6455.2	9376.46	25309.7	33818.1	22945.8
8	41576575	41576840	3wt_3mu_merged_p20_peak_132548	2956	.	26.0767	295.664	292.88	182	3wt_3mu_merged_p20_peak_132548	46422.7	0.84244	0.218611	3.8536	0.000116394	0.00650693	26422.9	32593.5	40716.4	50969.4	67241.3	60592.7
8	42226956	42227062	3wt_3mu_merged_p20_peak_132596	1763	.	15.9789	176.365	173.792	55	3wt_3mu_merged_p20_peak_132596	14955.4	1.102	0.273955	4.02257	5.75666e-05	0.00370151	7914.52	9200.72	11409.8	18163.1	27570.5	15473.9
8	4368449	4368596	3wt_3mu_merged_p20_peak_128377	3720	.	18.276	372.043	369.16	101	3wt_3mu_merged_p20_peak_128377	31295.9	2.11624	0.275097	7.6927	1.44058e-14	7.3911e-12	10069.8	11840.4	13286.7	31046.2	70768.1	50764.3
8	44613121	44613224	3wt_3mu_merged_p20_peak_132882	2830	.	13.7385	283.021	280.255	42	3wt_3mu_merged_p20_peak_132882	27578.5	0.760034	0.200732	3.78632	0.000152897	0.00814584	22342	19324.4	19765.5	33313.4	39362.5	31362.9
8	44877906	44878057	3wt_3mu_merged_p20_peak_132900a	1316	.	15.9452	131.657	129.199	28	3wt_3mu_merged_p20_peak_132900a	14416.2	1.29286	0.276364	4.67809	2.89562e-06	0.000299431	7231.42	9335.93	8503.84	14556.9	28068.2	18801.1
8	44877906	44878057	3wt_3mu_merged_p20_peak_132900b	1120	.	14.2993	112.005	109.61	119	3wt_3mu_merged_p20_peak_132900b	14416.2	1.29286	0.276364	4.67809	2.89562e-06	0.000299431	7231.42	9335.93	8503.84	14556.9	28068.2	18801.1
8	44925982	44926142	3wt_3mu_merged_p20_peak_132904	2686	.	17.6608	268.649	265.905	91	3wt_3mu_merged_p20_peak_132904	30435.2	1.16975	0.190252	6.14844	7.82483e-10	1.97231e-07	18007.9	17995.8	20193.5	44030.8	38675.5	43707.5
8	44949859	44949928	3wt_3mu_merged_p20_peak_132908	655	.	10.0815	65.5474	63.3563	25	3wt_3mu_merged_p20_peak_132908	5083.57	1.41538	0.375717	3.76715	0.00016512	0.00864827	1737.19	3862.54	2716.62	5097.44	9309.17	7778.45
8	45402091	45402396	3wt_3mu_merged_p20_peak_132918a	6149	.	29.8393	614.963	611.836	68	3wt_3mu_merged_p20_peak_132918a	89539.9	1.0253	0.221102	4.63723	3.53118e-06	0.000354787	48105.4	74846.2	54036	97455	137761	125036
8	45402091	45402396	3wt_3mu_merged_p20_peak_132918b	5050	.	25.9383	505.084	502.058	129	3wt_3mu_merged_p20_peak_132918b	89539.9	1.0253	0.221102	4.63723	3.53118e-06	0.000354787	48105.4	74846.2	54036	97455	137761	125036
8	45412328	45412414	3wt_3mu_merged_p20_peak_132923	3449	.	14.5925	344.963	342.113	48	3wt_3mu_merged_p20_peak_132923	26085.3	1.57685	0.250319	6.29935	2.98896e-10	8.26272e-08	9698.82	12704.6	16900.7	32146.9	46302.5	38758.1
8	45663888	45664080	3wt_3mu_merged_p20_peak_132934	5521	.	38.2625	552.156	549.086	96	3wt_3mu_merged_p20_peak_132934	39717.5	1.05612	0.244254	4.32384	1.53335e-05	0.0012443	16635.8	31952.6	28804.4	51638.9	54843.5	54430
8	45968005	45968110	3wt_3mu_merged_p20_peak_132957	552	.	9.05278	55.2421	53.1148	40	3wt_3mu_merged_p20_peak_132957	7251.57	1.92935	0.345351	5.58663	2.31519e-08	4.21292e-06	4658.02	1981.24	2403.8	10671.7	10326.1	13468.6
8	46044889	46045208	3wt_3mu_merged_p20_peak_132961	14030	.	59.9113	1403.05	1399.37	216	3wt_3mu_merged_p20_peak_132961	108873	0.791348	0.208155	3.80172	0.000143696	0.00772927	73874.7	83206.2	82140.7	103694	167982	142343
8	4629489	4629567	3wt_3mu_merged_p20_peak_128397	908	.	12.4476	90.8562	88.5419	37	3wt_3mu_merged_p20_peak_128397	7447.98	1.89693	0.337213	5.62531	1.85176e-08	3.48292e-06	2237.74	2727.88	4503	8510.96	14772.4	11935.9
8	46386530	46386640	3wt_3mu_merged_p20_peak_132976	3103	.	12.5195	310.388	307.583	60	3wt_3mu_merged_p20_peak_132976	36022.5	1.0846	0.240641	4.50713	6.57112e-06	0.000603888	22194.8	21388	25676.2	32988.8	58256.7	55630.6
8	46647671	46647881	3wt_3mu_merged_p20_peak_132985a	249	.	5.4361	24.9576	23.1163	30	3wt_3mu_merged_p20_peak_132985a	12788.3	1.0577	0.279009	3.79091	0.000150097	0.00802133	6024.22	8665.72	10216.1	14501.1	21982.8	15339.8
8	46647671	46647881	3wt_3mu_merged_p20_peak_132985b	439	.	7.55503	43.921	41.8788	166	3wt_3mu_merged_p20_peak_132985b	12788.3	1.0577	0.279009	3.79091	0.000150097	0.00802133	6024.22	8665.72	10216.1	14501.1	21982.8	15339.8
8	46651993	46652119	3wt_3mu_merged_p20_peak_132986	1115	.	11.6807	111.545	109.152	39	3wt_3mu_merged_p20_peak_132986	12157	1.76051	0.28045	6.27745	3.44162e-10	9.37599e-08	4581.47	4356.38	7697.09	17346.5	21717.8	17242.9
8	46660479	46660717	3wt_3mu_merged_p20_peak_132988a	1050	.	9.29876	105.092	102.722	75	3wt_3mu_merged_p20_peak_132988a	25122.7	1.82202	0.228451	7.97553	1.51731e-15	8.27438e-13	12596.1	8836.21	11804.9	44680	40466	32352.7
8	46660479	46660717	3wt_3mu_merged_p20_peak_132988b	579	.	6.53323	57.9804	55.8366	150	3wt_3mu_merged_p20_peak_132988b	25122.7	1.82202	0.228451	7.97553	1.51731e-15	8.27438e-13	12596.1	8836.21	11804.9	44680	40466	32352.7
8	4671849	4671957	3wt_3mu_merged_p20_peak_128400	463	.	8.12693	46.3852	44.322	21	3wt_3mu_merged_p20_peak_128400	5630.55	3.56279	0.442621	8.04929	8.32751e-16	4.70399e-13	1666.52	388.017	576.253	10159.4	10845.4	10147.7
8	46893973	46894105	3wt_3mu_merged_p20_peak_133016	2002	.	9.75258	200.267	197.642	74	3wt_3mu_merged_p20_peak_133016	30526.2	1.23124	0.197396	6.23742	4.44843e-10	1.17596e-07	16023.4	18131	20564	39907.2	44409.2	44122.6
8	4694451	4694582	3wt_3mu_merged_p20_peak_128402	849	.	6.07603	84.9289	82.6412	86	3wt_3mu_merged_p20_peak_128402	19889.2	2.52884	0.32782	7.71411	1.21829e-14	6.30658e-12	4563.8	7272.39	5787.22	16742.9	48152.4	36816.7
8	470697	470810	3wt_3mu_merged_p20_peak_127935	1798	.	13.4146	179.825	177.244	53	3wt_3mu_merged_p20_peak_127935	20424	2.35617	0.308661	7.63353	2.28415e-14	1.15148e-11	5676.78	4973.68	9384.69	26978.4	49813	25717.4
8	4737312	4737431	3wt_3mu_merged_p20_peak_128409	1144	.	14.505	114.42	112.017	41	3wt_3mu_merged_p20_peak_128409	12201.4	1.96365	0.303915	6.4612	1.03876e-10	3.07929e-08	7219.64	4597.42	3111.76	18584.1	21928.8	17766.5
8	48642266	48642334	3wt_3mu_merged_p20_peak_133207	730	.	10.8016	73.0259	70.7942	30	3wt_3mu_merged_p20_peak_133207	5481.71	1.29304	0.27888	4.63655	3.54277e-06	0.000355746	3321.27	3286.39	2922.42	8247.21	7513.33	7599.63
8	48778030	48778139	3wt_3mu_merged_p20_peak_133214	1156	.	14.6079	115.632	113.225	50	3wt_3mu_merged_p20_peak_133214	10563.3	1.34632	0.304225	4.42541	9.62613e-06	0.000839701	3603.93	6572.78	7721.79	14714.1	17509.5	13257.8
8	49455172	49455254	3wt_3mu_merged_p20_peak_133282	794	.	9.48536	79.4106	77.1485	36	3wt_3mu_merged_p20_peak_133282	7697.96	1.06947	0.261913	4.0833	4.4401e-05	0.00298193	4145.7	5297.03	5466.17	11011.5	9666.18	10601.2
8	50981070	50981211	3wt_3mu_merged_p20_peak_133441	3727	.	11.8756	372.729	369.844	67	3wt_3mu_merged_p20_peak_133441	48455.2	0.886371	0.206141	4.29982	1.70936e-05	0.00137091	31722.8	35192	35151.4	54530	78108.4	56026.5
8	51954456	51954623	3wt_3mu_merged_p20_peak_133561	3655	.	32.8163	365.559	362.683	80	3wt_3mu_merged_p20_peak_133561	31286.6	1.4851	0.31381	4.73248	2.21794e-06	0.000239047	9675.26	17554.8	22185.7	28099.3	60225.6	49978.8
8	522981	523039	3wt_3mu_merged_p20_peak_127940	954	.	12.8591	95.4617	93.1285	26	3wt_3mu_merged_p20_peak_127940	5470.21	1.5964	0.354815	4.49926	6.81915e-06	0.00062174	1884.41	3874.3	2395.57	6502.41	10418.1	7746.52
8	53032903	53033127	3wt_3mu_merged_p20_peak_133689	1399	.	7.12381	139.926	137.444	141	3wt_3mu_merged_p20_peak_133689	46776.6	0.943117	0.250664	3.76247	0.00016824	0.00877197	39560.8	31082.5	25379.8	83212.6	48520.2	52903.7
8	53116580	53116745	3wt_3mu_merged_p20_peak_133696	3862	.	18.4958	386.224	383.323	50	3wt_3mu_merged_p20_peak_133696	37942.8	3.7783	0.248524	15.2029	3.38109e-52	3.9089e-48	3762.93	5055.98	6659.84	75898.7	54886.8	81392.7
8	53251249	53251483	3wt_3mu_merged_p20_peak_133715a	3924	.	28.7293	392.478	389.57	77	3wt_3mu_merged_p20_peak_133715a	37514.1	0.850538	0.197954	4.29664	1.73407e-05	0.00138707	22424.5	27231.8	30648.4	50406.4	47671	46702.6
8	53251249	53251483	3wt_3mu_merged_p20_peak_133715b	749	.	9.41567	74.9147	72.6745	183	3wt_3mu_merged_p20_peak_133715b	37514.1	0.850538	0.197954	4.29664	1.73407e-05	0.00138707	22424.5	27231.8	30648.4	50406.4	47671	46702.6
8	53334364	53334467	3wt_3mu_merged_p20_peak_133731	3074	.	22.9423	307.413	304.612	56	3wt_3mu_merged_p20_peak_133731	20966.8	1.20625	0.235048	5.13193	2.86783e-07	3.94392e-05	12384.1	12769.3	12883.4	22378	37031.1	28354.9
8	53536701	53536845	3wt_3mu_merged_p20_peak_133749	1741	.	15.8747	174.167	171.599	87	3wt_3mu_merged_p20_peak_133749	18488.6	1.40531	0.256935	5.46952	4.51254e-08	7.60492e-06	7443.42	10888	12076.6	21287.5	27343.3	31892.9
8	54022987	54023105	3wt_3mu_merged_p20_peak_133807	1409	.	15.7272	140.939	138.454	66	3wt_3mu_merged_p20_peak_133807	12051.7	1.76335	0.293874	6.00035	1.96887e-09	4.51035e-07	4805.24	5485.16	6165.9	11579.6	24260.1	20014.5
8	54058151	54058260	3wt_3mu_merged_p20_peak_133816	3003	.	12.8081	300.335	297.544	52	3wt_3mu_merged_p20_peak_133816	30280.9	1.08376	0.249432	4.3449	1.39337e-05	0.00114464	24968.4	14627.1	18645.9	48636.2	42678.3	32129.2
8	54168931	54169048	3wt_3mu_merged_p20_peak_133843	1044	.	11.8541	104.433	102.065	39	3wt_3mu_merged_p20_peak_133843	12471.4	1.21269	0.310737	3.90264	9.51497e-05	0.0055204	4092.7	8130.73	10339.6	17351.6	17109.2	17804.9
8	54181405	54181535	3wt_3mu_merged_p20_peak_133845	502	.	8.53842	50.2699	48.1773	51	3wt_3mu_merged_p20_peak_133845	8492.59	1.09799	0.25627	4.28451	1.83139e-05	0.00144689	5435.34	5749.71	5038.1	10666.6	13669	10396.8
8	54268919	54269134	3wt_3mu_merged_p20_peak_133861	3043	.	14.2317	304.321	301.525	77	3wt_3mu_merged_p20_peak_133861	58068	0.879665	0.176299	4.98962	6.04972e-07	7.75401e-05	40332.2	40054	42297	69660	81824.4	74240.1
8	649972	650162	3wt_3mu_merged_p20_peak_127948a	4068	.	22.7353	406.843	403.919	43	3wt_3mu_merged_p20_peak_127948a	55217	1.17502	0.270434	4.34494	1.39313e-05	0.00114464	28283.8	33722.2	39687.4	43909	94536	91163.7
8	649972	650162	3wt_3mu_merged_p20_peak_127948b	4528	.	24.5112	452.893	449.919	93	3wt_3mu_merged_p20_peak_127948b	55217	1.17502	0.270434	4.34494	1.39313e-05	0.00114464	28283.8	33722.2	39687.4	43909	94536	91163.7
8	7445660	7445785	3wt_3mu_merged_p20_peak_128656	4037	.	24.1746	403.723	400.803	83	3wt_3mu_merged_p20_peak_128656	27705.6	1.10074	0.264349	4.16397	3.12756e-05	0.00224774	12284	15655.9	24935.3	33019.3	42672.9	37666.1
8	81779	81912	3wt_3mu_merged_p20_peak_127882	2089	.	13.8536	208.969	206.328	72	3wt_3mu_merged_p20_peak_127882	24144.5	1.5922	0.285316	5.58047	2.39875e-08	4.33766e-06	8644.73	12451.8	14990.8	23341.7	47076	38362.2
8	8489703	8489764	3wt_3mu_merged_p20_peak_128782	676	.	10.2873	67.6627	65.4597	31	3wt_3mu_merged_p20_peak_128782	4854.04	2.57255	0.369258	6.96681	3.24199e-12	1.24936e-09	812.651	1857.78	1522.95	10260.8	7172.55	7497.45
9	11270989	11271115	3wt_3mu_merged_p20_peak_135231a	416	.	7.61257	41.6523	39.628	28	3wt_3mu_merged_p20_peak_135231a	8225.12	1.81951	0.43592	4.17395	2.99363e-05	0.00217848	3315.38	2980.68	4601.79	3804.06	18153.2	16495.7
9	11270989	11271115	3wt_3mu_merged_p20_peak_135231b	463	.	8.12693	46.3852	44.322	89	3wt_3mu_merged_p20_peak_135231b	8225.12	1.81951	0.43592	4.17395	2.99363e-05	0.00217848	3315.38	2980.68	4601.79	3804.06	18153.2	16495.7
9	12521977	12522186	3wt_3mu_merged_p20_peak_135364a	1573	.	13.9913	157.391	154.863	43	3wt_3mu_merged_p20_peak_135364a	34251.6	0.87579	0.214423	4.08441	4.41891e-05	0.00297365	28619.5	22981.2	20885	48423.2	47681.8	36918.9
9	12521977	12522186	3wt_3mu_merged_p20_peak_135364b	2176	.	17.4137	217.695	215.037	121	3wt_3mu_merged_p20_peak_135364b	34251.6	0.87579	0.214423	4.08441	4.41891e-05	0.00297365	28619.5	22981.2	20885	48423.2	47681.8	36918.9
9	12594933	12595188	3wt_3mu_merged_p20_peak_135377	5841	.	30.7558	584.185	581.085	127	3wt_3mu_merged_p20_peak_135377	66617.9	2.73412	0.6283	4.35161	1.35144e-05	0.00111601	31534.4	10940.9	9746.9	82294.6	144555	120636
9	13040084	13040514	3wt_3mu_merged_p20_peak_135432a	6049	.	30.295	604.998	601.88	100	3wt_3mu_merged_p20_peak_135432a	82583.5	0.696204	0.186226	3.73848	0.000185134	0.00942884	64423.2	58878.7	65808.1	100513	117779	88098.3
9	13040084	13040514	3wt_3mu_merged_p20_peak_135432b	725	.	7.69379	72.5248	70.2966	377	3wt_3mu_merged_p20_peak_135432b	82583.5	0.696204	0.186226	3.73848	0.000185134	0.00942884	64423.2	58878.7	65808.1	100513	117779	88098.3
9	13059628	13059723	3wt_3mu_merged_p20_peak_135437	296	.	5.96358	29.6001	27.698	22	3wt_3mu_merged_p20_peak_135437	4888.88	1.99268	0.310272	6.42237	1.34171e-10	3.92367e-08	2255.4	1546.19	2090.97	8095.05	8346.34	6999.32
9	13291940	13292038	3wt_3mu_merged_p20_peak_135467	453	.	8.01197	45.3768	43.3242	36	3wt_3mu_merged_p20_peak_135467	6681.46	1.18032	0.289958	4.07068	4.68758e-05	0.00311815	4499.03	3215.84	4560.63	8257.35	8584.35	10971.6
9	13495596	13495810	3wt_3mu_merged_p20_peak_135498a	379	.	7.20108	37.9702	35.9788	122	3wt_3mu_merged_p20_peak_135498a	13745.8	0.974108	0.238342	4.08702	4.3694e-05	0.00294754	9952.03	10059.1	7804.11	15535.8	20955.1	18168.9
9	13495596	13495810	3wt_3mu_merged_p20_peak_135498b	897	.	12.3447	89.7138	87.4042	179	3wt_3mu_merged_p20_peak_135498b	13745.8	0.974108	0.238342	4.08702	4.3694e-05	0.00294754	9952.03	10059.1	7804.11	15535.8	20955.1	18168.9
9	13508259	13508459	3wt_3mu_merged_p20_peak_135499	560	.	8.15556	56.057	53.926	113	3wt_3mu_merged_p20_peak_135499	12728.4	0.988849	0.253028	3.90806	9.30387e-05	0.00542698	10487.9	7860.29	7236.09	17143.6	19446	14196.6
9	13598275	13598379	3wt_3mu_merged_p20_peak_135508	1060	.	13.7849	106.024	103.65	43	3wt_3mu_merged_p20_peak_135508	9843.42	1.68494	0.306479	5.49773	3.84701e-08	6.57922e-06	3974.93	5344.06	4692.34	10544.9	21533.9	12970.5
9	15051456	15051694	3wt_3mu_merged_p20_peak_135746a	462	.	7.1119	46.2294	44.1697	35	3wt_3mu_merged_p20_peak_135746a	24296.1	1.14264	0.223308	5.11686	3.10666e-07	4.24209e-05	18308.2	15444.3	11681.5	34282.2	33580.1	32480.4
9	15051456	15051694	3wt_3mu_merged_p20_peak_135746b	1823	.	17.0307	182.35	179.764	167	3wt_3mu_merged_p20_peak_135746b	24296.1	1.14264	0.223308	5.11686	3.10666e-07	4.24209e-05	18308.2	15444.3	11681.5	34282.2	33580.1	32480.4
9	15356682	15356793	3wt_3mu_merged_p20_peak_135789	1956	.	19.5748	195.622	193.007	60	3wt_3mu_merged_p20_peak_135789	15758.1	1.04557	0.246707	4.23812	2.25396e-05	0.00173259	11065	11240.7	8545.01	18934.1	26607.7	18156.1
9	15380217	15380310	3wt_3mu_merged_p20_peak_135793	1507	.	17.4883	150.731	148.22	46	3wt_3mu_merged_p20_peak_135793	9910.76	1.31392	0.259208	5.06897	3.99981e-07	5.34385e-05	5665	6766.79	4618.25	13679.4	12673.7	16061.4
9	15424627	15424812	3wt_3mu_merged_p20_peak_135803	1394	.	14.2389	139.451	136.971	138	3wt_3mu_merged_p20_peak_135803	21790.5	0.874409	0.206721	4.2299	2.33795e-05	0.00177986	13049.5	16996.3	16102.1	28454.4	27581.3	28559.3
9	15615276	15615334	3wt_3mu_merged_p20_peak_135811	730	.	10.8016	73.0259	70.7942	22	3wt_3mu_merged_p20_peak_135811	4672.49	1.30001	0.340968	3.8127	0.000137459	0.00745393	2390.84	1951.85	3762.11	6446.62	6599.18	6884.37
9	15970780	15970886	3wt_3mu_merged_p20_peak_135819	943	.	12.7562	94.3051	91.9765	73	3wt_3mu_merged_p20_peak_135819	9545.81	1.19359	0.320222	3.72739	0.000193475	0.00972792	3621.6	7366.45	6437.57	9956.5	16871.2	13021.6
9	16332243	16332313	3wt_3mu_merged_p20_peak_135846	435	.	7.81831	43.5285	41.4884	31	3wt_3mu_merged_p20_peak_135846	4532.76	3.6182	0.479311	7.54877	4.39401e-14	2.12847e-11	1224.87	446.808	370.448	4316.34	11526.9	9311.15
9	16388486	16388722	3wt_3mu_merged_p20_peak_135854a	262	.	4.06261	26.2605	24.3997	18	3wt_3mu_merged_p20_peak_135854a	21234.8	0.899939	0.225694	3.98743	6.67943e-05	0.00416994	15481.6	17366.7	11599.1	29205.1	28619.9	25136.3
9	16388486	16388722	3wt_3mu_merged_p20_peak_135854b	511	.	5.75026	51.1942	49.0971	112	3wt_3mu_merged_p20_peak_135854b	21234.8	0.899939	0.225694	3.98743	6.67943e-05	0.00416994	15481.6	17366.7	11599.1	29205.1	28619.9	25136.3
9	16388486	16388722	3wt_3mu_merged_p20_peak_135854c	355	.	4.73131	35.5536	33.5865	203	3wt_3mu_merged_p20_peak_135854c	21234.8	0.899939	0.225694	3.98743	6.67943e-05	0.00416994	15481.6	17366.7	11599.1	29205.1	28619.9	25136.3
9	16392907	16392985	3wt_3mu_merged_p20_peak_135856	463	.	6.77992	46.3535	44.2931	38	3wt_3mu_merged_p20_peak_135856	5573.24	1.50166	0.353699	4.24559	2.18023e-05	0.00168338	3886.59	2874.86	1959.26	5985.06	10661.5	8072.21
9	16865114	16865224	3wt_3mu_merged_p20_peak_135923	1067	.	13.4561	106.74	104.364	45	3wt_3mu_merged_p20_peak_135923	11004.8	1.38559	0.272788	5.07937	3.78689e-07	5.07502e-05	5217.46	7342.94	5713.13	11802.7	18856.4	17096
9	16877800	16877879	3wt_3mu_merged_p20_peak_135925	3866	.	12.5277	386.647	383.746	38	3wt_3mu_merged_p20_peak_135925	29911.1	1.08206	0.248469	4.3549	1.33128e-05	0.00110239	20675.5	18260.3	18637.7	26942.9	51760.3	43190.2
9	17399456	17399551	3wt_3mu_merged_p20_peak_135971	1060	.	13.7849	106.024	103.65	42	3wt_3mu_merged_p20_peak_135971	8672.49	1.45114	0.303359	4.78359	1.72195e-06	0.000194664	3680.49	4497.47	5762.53	9307.27	16627.8	12159.4
9	17423488	17423800	3wt_3mu_merged_p20_peak_135973a	6787	.	20.7779	678.741	675.561	70	3wt_3mu_merged_p20_peak_135973a	217627	1.00202	0.209904	4.7737	1.80875e-06	0.000202496	154174	145759	134909	210040	348366	312511
9	17423488	17423800	3wt_3mu_merged_p20_peak_135973b	23481	.	51.0122	2348.13	2343.85	188	3wt_3mu_merged_p20_peak_135973b	217627	1.00202	0.209904	4.7737	1.80875e-06	0.000202496	154174	145759	134909	210040	348366	312511
9	17438571	17438789	3wt_3mu_merged_p20_peak_135977	2422	.	16.2601	242.267	239.566	95	3wt_3mu_merged_p20_peak_135977	42247.3	1.16122	0.210801	5.50861	3.61675e-08	6.23461e-06	29708.9	24486.3	24120.3	46303.1	63195.3	65669.8
9	17509327	17509543	3wt_3mu_merged_p20_peak_135982a	741	.	10.9045	74.111	71.8737	57	3wt_3mu_merged_p20_peak_135982a	14992.2	1.93333	0.278283	6.94734	3.72229e-12	1.40023e-09	8238.4	5914.33	4503	18888.4	29041.8	23367.3
9	17509327	17509543	3wt_3mu_merged_p20_peak_135982b	593	.	9.46427	59.3084	57.1547	162	3wt_3mu_merged_p20_peak_135982b	14992.2	1.93333	0.278283	6.94734	3.72229e-12	1.40023e-09	8238.4	5914.33	4503	18888.4	29041.8	23367.3
9	17663867	17663953	3wt_3mu_merged_p20_peak_135999	315	.	6.33009	31.5841	29.6607	62	3wt_3mu_merged_p20_peak_135999	4545.82	1.40724	0.300655	4.68057	2.86084e-06	0.000296542	2667.62	2363.38	2436.73	6512.56	7291.56	6003.07
9	17914885	17914959	3wt_3mu_merged_p20_peak_136036	425	.	7.71544	42.5876	40.5553	42	3wt_3mu_merged_p20_peak_136036	4732.1	1.51018	0.369413	4.08805	4.35008e-05	0.00293759	3668.71	1851.9	1852.24	5462.63	7599.88	7957.26
9	1914934	1915062	3wt_3mu_merged_p20_peak_134104	690	.	8.37013	69.0201	66.8101	84	3wt_3mu_merged_p20_peak_134104	11166	0.878784	0.234808	3.74257	0.000182148	0.00930959	8179.51	8083.7	7334.87	13745.3	16573.7	13079
9	19489024	19489317	3wt_3mu_merged_p20_peak_136223a	431	.	4.86935	43.1219	41.0868	26	3wt_3mu_merged_p20_peak_136223a	74667	1.07611	0.172738	6.22974	4.67212e-10	1.22205e-07	46862.9	44874.8	52397.8	104013	99972.2	99880.9
9	19489024	19489317	3wt_3mu_merged_p20_peak_136223b	5349	.	23.0099	534.936	531.882	225	3wt_3mu_merged_p20_peak_136223b	74667	1.07611	0.172738	6.22974	4.67212e-10	1.22205e-07	46862.9	44874.8	52397.8	104013	99972.2	99880.9
9	19550708	19550827	3wt_3mu_merged_p20_peak_136230	1324	.	12.6487	132.429	129.969	41	3wt_3mu_merged_p20_peak_136230	15606.6	1.2796	0.2348	5.44977	5.04344e-08	8.45036e-06	10081.6	9394.72	7837.04	26222.7	18818.5	21285.4
9	196827	196915	3wt_3mu_merged_p20_peak_133899	1262	.	15.2556	126.207	123.766	54	3wt_3mu_merged_p20_peak_133899	9605.13	2.96936	0.371148	8.00046	1.23957e-15	6.86775e-13	3209.38	2210.52	1094.88	10773.1	20111.3	20231.6
9	46712773	46712850	3wt_3mu_merged_p20_peak_139141	1430	.	16.8711	143.03	140.539	40	3wt_3mu_merged_p20_peak_139141	7672.55	2.03135	0.438467	4.63284	3.60679e-06	0.000361129	1136.53	2251.68	5671.97	12523	14393.8	10058.3
9	54178183	54178238	3wt_3mu_merged_p20_peak_139936	365	.	4.1027	36.5721	34.5955	27	3wt_3mu_merged_p20_peak_139936	5852.52	5.47341	0.486095	11.26	2.06849e-29	4.37449e-26	158.997	405.655	205.805	3915.65	17190.3	13238.7
9	54381665	54381733	3wt_3mu_merged_p20_peak_139960	425	.	7.71544	42.5876	40.5553	33	3wt_3mu_merged_p20_peak_139960	4156.65	1.52982	0.387839	3.94448	7.99739e-05	0.00479888	2626.4	1264	2527.28	4356.92	6961.6	7203.68
9	5451910	5451966	3wt_3mu_merged_p20_peak_134555	234	.	5.33963	23.4208	21.6017	20	3wt_3mu_merged_p20_peak_134555	2604.2	2.51364	0.553365	4.54247	5.55991e-06	0.000521177	306.216	1452.13	568.021	6720.51	3461.87	3116.49
9	56102905	56103160	3wt_3mu_merged_p20_peak_140169a	2390	.	17.2613	239.069	236.373	77	3wt_3mu_merged_p20_peak_140169a	43255.7	1.7757	0.274001	6.48062	9.13442e-11	2.72643e-08	21794.4	18395.6	18473	44223.5	101011	55637
9	56102905	56103160	3wt_3mu_merged_p20_peak_140169b	1004	.	9.7992	100.406	98.0541	191	3wt_3mu_merged_p20_peak_140169b	43255.7	1.7757	0.274001	6.48062	9.13442e-11	2.72643e-08	21794.4	18395.6	18473	44223.5	101011	55637
9	56390302	56390413	3wt_3mu_merged_p20_peak_140232	1178	.	11.3992	117.822	115.408	66	3wt_3mu_merged_p20_peak_140232	13156.7	1.28032	0.339169	3.77487	0.00016009	0.00843322	4292.92	9382.97	9351.76	20318.8	24022.1	11571.9
9	56408410	56408512	3wt_3mu_merged_p20_peak_140237	909	.	8.4746	90.9174	88.6029	64	3wt_3mu_merged_p20_peak_140237	11742.7	1.11351	0.262955	4.2346	2.28956e-05	0.00175452	7761.41	6043.67	8470.92	16474.1	19207.9	12497.9
9	70071	70418	3wt_3mu_merged_p20_peak_133883a	4276	.	11.4481	427.615	424.668	51	3wt_3mu_merged_p20_peak_133883a	107047	0.85282	0.195591	4.36023	1.29926e-05	0.00108064	73244.6	65639.6	90018.9	118656	147816	146909
9	70071	70418	3wt_3mu_merged_p20_peak_133883b	835	.	4.55344	83.5509	81.2691	271	3wt_3mu_merged_p20_peak_133883b	107047	0.85282	0.195591	4.36023	1.29926e-05	0.00108064	73244.6	65639.6	90018.9	118656	147816	146909
9	8987067	8987221	3wt_3mu_merged_p20_peak_134999	1223	.	15.0763	122.305	119.876	65	3wt_3mu_merged_p20_peak_134999	16162.8	1.16474	0.257296	4.52685	5.98695e-06	0.000557091	10935.5	11634.6	7334.87	20263	27235.1	19573.8
9	9235475	9235670	3wt_3mu_merged_p20_peak_135031	5565	.	37.4022	556.519	553.444	95	3wt_3mu_merged_p20_peak_135031	49345.9	1.40892	0.251284	5.60687	2.06022e-08	3.8089e-06	23036.9	28195.9	29767.6	47205.9	95666.5	72202.9
9	9520921	9521005	3wt_3mu_merged_p20_peak_135046	282	.	5.39915	28.221	26.337	38	3wt_3mu_merged_p20_peak_135046	4782.56	1.22832	0.321958	3.81517	0.00013609	0.00740284	3639.26	2398.65	2543.74	6137.22	7794.61	6181.89
9	9647914	9648118	3wt_3mu_merged_p20_peak_135059	1713	.	13.75	171.31	168.748	81	3wt_3mu_merged_p20_peak_135059	29801.2	1.29047	0.200684	6.43037	1.27295e-10	3.74787e-08	18055	18301.5	15525.9	41423.7	47822.4	37678.8
9	9707421	9707480	3wt_3mu_merged_p20_peak_135067	326	.	6.58384	32.6329	30.6949	31	3wt_3mu_merged_p20_peak_135067	3241.3	1.62472	0.387543	4.19236	2.76062e-05	0.00204065	2220.07	1393.34	1144.27	4260.55	5722.9	4706.66
10	1025595	1025727	3wt_3mu_merged_p20_peak_6735	601	.	9.52451	60.1545	57.9971	77	3wt_3mu_merged_p20_peak_6735	9844.13	0.883499	0.234441	3.76853	0.000164209	0.00860576	6571.88	7619.25	6569.28	12974.4	12927.9	12402.1
10	10339544	10339795	3wt_3mu_merged_p20_peak_7615a	1241	.	15.328	124.2	121.764	57	3wt_3mu_merged_p20_peak_7615a	40930.3	0.867683	0.215908	4.01875	5.85066e-05	0.00375221	32688.6	29554	24688.3	41925.8	55557.5	61167.5
10	10339544	10339795	3wt_3mu_merged_p20_peak_7615b	4018	.	35.1824	401.881	398.962	162	3wt_3mu_merged_p20_peak_7615b	40930.3	0.867683	0.215908	4.01875	5.85066e-05	0.00375221	32688.6	29554	24688.3	41925.8	55557.5	61167.5
10	10384030	10384190	3wt_3mu_merged_p20_peak_7622	2146	.	12.3016	214.606	211.954	82	3wt_3mu_merged_p20_peak_7622	33883.5	1.07411	0.210019	5.11433	3.14859e-07	4.29257e-05	25174.5	19800.6	20489.9	45587.9	53215.4	39032.7
10	10593597	10593818	3wt_3mu_merged_p20_peak_7641a	744	.	10.5564	74.4769	72.2383	58	3wt_3mu_merged_p20_peak_7641a	18492.4	1.1669	0.276514	4.22003	2.44273e-05	0.00184418	16088.1	8195.4	9903.32	28834.8	26953.9	20978.8
10	10593597	10593818	3wt_3mu_merged_p20_peak_7641b	701	.	10.1587	70.1818	67.9656	134	3wt_3mu_merged_p20_peak_7641b	18492.4	1.1669	0.276514	4.22003	2.44273e-05	0.00184418	16088.1	8195.4	9903.32	28834.8	26953.9	20978.8
10	10728839	10729069	3wt_3mu_merged_p20_peak_7653	19198	.	56.0839	1919.9	1915.89	85	3wt_3mu_merged_p20_peak_7653	150355	1.18121	0.214759	5.50014	3.79494e-08	6.52233e-06	119407	73264.7	83400.2	183163	214138	228755
10	10741212	10741631	3wt_3mu_merged_p20_peak_7658a	956	.	4.75122	95.6624	93.3286	50	3wt_3mu_merged_p20_peak_7658a	103296	0.746359	0.175163	4.26093	2.03576e-05	0.00158453	83985.8	76204.3	71274.2	117835	134066	136410
10	10741212	10741631	3wt_3mu_merged_p20_peak_7658b	3720	.	10.221	372.076	369.192	126	3wt_3mu_merged_p20_peak_7658b	103296	0.746359	0.175163	4.26093	2.03576e-05	0.00158453	83985.8	76204.3	71274.2	117835	134066	136410
10	10741212	10741631	3wt_3mu_merged_p20_peak_7658c	356	.	3.03678	35.6967	33.7288	256	3wt_3mu_merged_p20_peak_7658c	103296	0.746359	0.175163	4.26093	2.03576e-05	0.00158453	83985.8	76204.3	71274.2	117835	134066	136410
10	10741212	10741631	3wt_3mu_merged_p20_peak_7658d	654	.	3.98204	65.4377	63.2488	373	3wt_3mu_merged_p20_peak_7658d	103296	0.746359	0.175163	4.26093	2.03576e-05	0.00158453	83985.8	76204.3	71274.2	117835	134066	136410
10	11471350	11471563	3wt_3mu_merged_p20_peak_7740	2127	.	18.6964	212.712	210.064	134	3wt_3mu_merged_p20_peak_7740	25275.1	0.882813	0.231628	3.81134	0.000138217	0.007488	19927.6	19500.8	13887.7	31289.7	39021.7	28022.8
10	13924998	13925054	3wt_3mu_merged_p20_peak_7906	593	.	9.46427	59.3084	57.1547	25	3wt_3mu_merged_p20_peak_7906	4163.46	1.69709	0.379886	4.46737	7.91887e-06	0.00070823	2520.4	2151.73	1210.13	6086.5	8113.75	4898.25
10	1525309	1525376	3wt_3mu_merged_p20_peak_6782	840	.	11.8303	84.0558	81.771	25	3wt_3mu_merged_p20_peak_6782	5419.49	1.66068	0.380574	4.36361	1.27932e-05	0.00106883	3203.5	2622.06	1983.96	5031.51	12657.4	7018.48
10	15568989	15569089	3wt_3mu_merged_p20_peak_8037	400	.	6.624	40.0471	38.0377	46	3wt_3mu_merged_p20_peak_8037	6797.12	1.08641	0.281068	3.86531	0.00011095	0.00625706	4304.7	4227.04	4527.7	9905.78	10677.7	7139.82
10	16854375	16854509	3wt_3mu_merged_p20_peak_8162	989	.	13.1677	98.9522	96.6051	83	3wt_3mu_merged_p20_peak_8162	11842	2.20505	0.399159	5.52423	3.30926e-08	5.76183e-06	5176.24	2945.4	4544.16	33759.8	16433	8193.55
10	20511907	20511993	3wt_3mu_merged_p20_peak_8484	1425	.	11.8898	142.562	140.074	38	3wt_3mu_merged_p20_peak_8484	12243.2	1.39656	0.305098	4.57743	4.70725e-06	0.000452502	8574.06	3756.71	7894.66	16413.3	17725.8	19094.9
10	220104	220429	3wt_3mu_merged_p20_peak_6619a	383	.	5.26508	38.3334	36.34	44	3wt_3mu_merged_p20_peak_6619a	49870.8	1.52103	0.312297	4.87048	1.11329e-06	0.000133793	11901.2	38443.1	26976.9	71866.4	83939.4	66097.6
10	220104	220429	3wt_3mu_merged_p20_peak_6619b	2662	.	17.2437	266.251	263.511	255	3wt_3mu_merged_p20_peak_6619b	49870.8	1.52103	0.312297	4.87048	1.11329e-06	0.000133793	11901.2	38443.1	26976.9	71866.4	83939.4	66097.6
10	223761	223911	3wt_3mu_merged_p20_peak_6620	1234	.	10.2016	123.453	121.02	71	3wt_3mu_merged_p20_peak_6620	20468.3	1.47171	0.309985	4.7477	2.05743e-06	0.000225961	7190.2	17208	8141.63	34561.2	31210.9	24497.6
10	26943611	26943699	3wt_3mu_merged_p20_peak_9059	868	.	11.0124	86.8608	84.5642	41	3wt_3mu_merged_p20_peak_9059	7349.83	1.54599	0.382503	4.04177	5.30482e-05	0.00346506	1695.97	4603.3	4955.77	8972.52	14355.9	9515.51
10	277103	277168	3wt_3mu_merged_p20_peak_6631	443	.	5.94002	44.3975	42.3529	34	3wt_3mu_merged_p20_peak_6631	5395.23	1.55367	0.338406	4.59115	4.40805e-06	0.000426815	1796.08	3345.18	3087.07	9865.2	7010.28	7267.55
10	3132646	3132715	3wt_3mu_merged_p20_peak_6917	416	.	7.61257	41.6523	39.628	40	3wt_3mu_merged_p20_peak_6917	4130.08	2.07952	0.406348	5.11758	3.09487e-07	4.23265e-05	2243.62	875.979	1621.74	4691.68	8194.89	7152.59
10	3285544	3285781	3wt_3mu_merged_p20_peak_6936	5296	.	41.8945	529.672	526.622	97	3wt_3mu_merged_p20_peak_6936	54032.4	0.858282	0.22376	3.83573	0.000125194	0.00691202	44507.4	31817.4	38930	59150.6	88531.8	61256.9
10	32893173	32893385	3wt_3mu_merged_p20_peak_9621	8152	.	20.3382	815.294	812.009	126	3wt_3mu_merged_p20_peak_9621	90829.1	1.82356	0.202311	9.01367	1.99276e-19	1.50577e-16	36716.5	38772.3	44569	121101	174884	128932
10	34962107	34962177	3wt_3mu_merged_p20_peak_9807	861	.	7.68241	86.1752	83.8821	39	3wt_3mu_merged_p20_peak_9807	8654.69	1.12002	0.282196	3.96895	7.21904e-05	0.00445356	6730.87	4526.87	5103.95	10428.2	14696.7	10441.5
10	35108600	35108849	3wt_3mu_merged_p20_peak_9825	13648	.	33.2816	1364.82	1361.17	108	3wt_3mu_merged_p20_peak_9825	184193	1.06226	0.274985	3.86299	0.000112007	0.00630437	186945	79279	91632.4	212703	273368	261229
10	36038198	36038352	3wt_3mu_merged_p20_peak_9951	8100	.	28.1118	810.053	806.772	98	3wt_3mu_merged_p20_peak_9951	67650.4	1.70993	0.201251	8.4965	1.95394e-17	1.25035e-14	37705.8	25274	32047.9	110541	97348.8	102985
10	36691627	36691722	3wt_3mu_merged_p20_peak_10011	1554	.	10.6533	155.459	152.936	55	3wt_3mu_merged_p20_peak_10011	15972.4	2.75458	0.298363	9.23231	2.64864e-20	2.14634e-17	3097.5	4532.75	4741.74	16753.1	31968.2	34741.2
10	36837041	36837138	3wt_3mu_merged_p20_peak_10025	343	.	6.78959	34.3862	32.4298	57	3wt_3mu_merged_p20_peak_10025	5470.19	13.1418	1.21812	10.7886	3.8989e-27	6.20304e-24	0	0	0	10407.9	11716.3	10697
10	37035074	37035308	3wt_3mu_merged_p20_peak_10036	1430	.	16.8711	143.03	140.539	110	3wt_3mu_merged_p20_peak_10036	23177.6	1.23507	0.221788	5.5687	2.56652e-08	4.55243e-06	12130.9	14503.6	14834.4	36113.2	35549	25934.5
10	38653818	38654023	3wt_3mu_merged_p20_peak_10243	851	.	11.9332	85.18	82.8902	122	3wt_3mu_merged_p20_peak_10243	15219.3	2.03216	0.318484	6.38072	1.76262e-10	5.01704e-08	3109.27	7836.78	6997.36	19446.4	25379.8	28546.5
10	39085306	39085444	3wt_3mu_merged_p20_peak_10312	1855	.	6.47209	185.568	182.975	70	3wt_3mu_merged_p20_peak_10312	41211.7	6.38685	0.213768	29.8775	3.85407e-196	6.68358e-191	830.318	940.648	1160.74	71957.7	88580.5	83800.3
10	39091648	39091802	3wt_3mu_merged_p20_peak_10313	6019	.	44.5481	601.922	598.806	87	3wt_3mu_merged_p20_peak_10313	36932.8	0.838454	0.205615	4.07778	4.5467e-05	0.00304194	28584.1	26426.3	24466	46064.7	56320.2	39735.2
10	40828477	40828536	3wt_3mu_merged_p20_peak_10460	204	.	2.90668	20.4655	18.6874	8	3wt_3mu_merged_p20_peak_10460	5870.09	2.14277	0.446344	4.80071	1.58102e-06	0.000180735	824.429	2040.03	3646.86	7253.08	8140.79	13315.3
10	40922285	40922426	3wt_3mu_merged_p20_peak_10469	741	.	10.9045	74.111	71.8737	55	3wt_3mu_merged_p20_peak_10469	11128.9	1.28791	0.252239	5.1059	3.29223e-07	4.47434e-05	6112.55	7307.66	5976.56	12690.4	16108.5	18577.6
10	43752027	43752327	3wt_3mu_merged_p20_peak_10783	2424	.	19.1907	242.477	239.775	158	3wt_3mu_merged_p20_peak_10783	55456	0.715792	0.175151	4.08671	4.37534e-05	0.00294891	38689.3	44345.7	42889.7	70030.3	69751.2	67030
10	5683780	5684112	3wt_3mu_merged_p20_peak_7190a	552	.	8.10185	55.2587	53.1313	40	3wt_3mu_merged_p20_peak_7190a	41352.2	1.14054	0.236463	4.82332	1.41187e-06	0.000164213	30339	29636.3	17435.8	57487	61588.8	51626.4
10	5683780	5684112	3wt_3mu_merged_p20_peak_7190b	5012	.	30.3291	501.253	498.231	280	3wt_3mu_merged_p20_peak_7190b	41352.2	1.14054	0.236463	4.82332	1.41187e-06	0.000164213	30339	29636.3	17435.8	57487	61588.8	51626.4
10	5850310	5850432	3wt_3mu_merged_p20_peak_7208	3327	.	11.6337	332.736	329.902	44	3wt_3mu_merged_p20_peak_7208	36446.2	1.24517	0.205295	6.06526	1.31737e-09	3.17738e-07	17707.6	23175.2	24005	55985.7	51625.1	46178.9
10	6276364	6276511	3wt_3mu_merged_p20_peak_7241a	868	.	11.2792	86.8596	84.5631	26	3wt_3mu_merged_p20_peak_7241a	9164.29	1.41582	0.264234	5.35821	8.4052e-08	1.31197e-05	4216.37	6243.55	4527.7	14034.5	13874.5	12089.2
10	6276364	6276511	3wt_3mu_merged_p20_peak_7241b	312	.	6.04933	31.2288	29.3077	120	3wt_3mu_merged_p20_peak_7241b	9164.29	1.41582	0.264234	5.35821	8.4052e-08	1.31197e-05	4216.37	6243.55	4527.7	14034.5	13874.5	12089.2
10	6280921	6281024	3wt_3mu_merged_p20_peak_7242	2534	.	24.6798	253.422	250.702	51	3wt_3mu_merged_p20_peak_7242	15992.6	1.01749	0.246823	4.12237	3.74992e-05	0.00260744	8073.51	10500	13163.3	21952	23318.9	18948
10	6340333	6340522	3wt_3mu_merged_p20_peak_7247	6149	.	32.0901	614.937	611.811	95	3wt_3mu_merged_p20_peak_7247	50552.3	0.897351	0.216912	4.13693	3.51987e-05	0.00247527	34207.9	29542.2	42214.6	56335.6	79449.8	61563.4
10	6375893	6376015	3wt_3mu_merged_p20_peak_7250	1383	.	14.0393	138.354	135.877	72	3wt_3mu_merged_p20_peak_7250	16094.4	0.918634	0.208034	4.4158	1.00638e-05	0.000870436	10328.9	11911	11171.1	21642.6	21198.5	20314.6
10	6888945	6889066	3wt_3mu_merged_p20_peak_7275	542	.	8.94991	54.2377	52.1171	48	3wt_3mu_merged_p20_peak_7275	8068.63	1.56025	0.302069	5.1652	2.40178e-07	3.36164e-05	4557.91	2880.74	4824.06	10093.4	10996.8	15058.8
10	7555621	7555751	3wt_3mu_merged_p20_peak_7326	3655	.	32.8163	365.559	362.683	54	3wt_3mu_merged_p20_peak_7326	23913.7	1.53511	0.253388	6.05833	1.37538e-09	3.2673e-07	11913	9041.98	15863.4	28388.5	39990	38285.5
10	7568198	7568272	3wt_3mu_merged_p20_peak_7331	1068	.	5.48844	106.875	104.499	34	3wt_3mu_merged_p20_peak_7331	15630	1.11149	0.247693	4.48736	7.21119e-06	0.000650643	9274.83	10541.1	9853.92	15860.4	26472.5	21777.1
10	7598384	7598607	3wt_3mu_merged_p20_peak_7334	3514	.	28.2343	351.452	348.593	142	3wt_3mu_merged_p20_peak_7334	45528.3	0.775329	0.208164	3.7246	0.000195622	0.0098103	29008.1	31159	40584.7	51796.1	65450.9	55170.8
10	7892215	7892525	3wt_3mu_merged_p20_peak_7365a	787	.	10.277	78.7706	76.5107	132	3wt_3mu_merged_p20_peak_7365a	47104.2	0.892661	0.213426	4.18253	2.88288e-05	0.00211122	27064.8	31835.1	40049.6	67479	63963.4	52233.1
10	7892215	7892525	3wt_3mu_merged_p20_peak_7365b	3155	.	26.2601	315.586	312.774	239	3wt_3mu_merged_p20_peak_7365b	47104.2	0.892661	0.213426	4.18253	2.88288e-05	0.00211122	27064.8	31835.1	40049.6	67479	63963.4	52233.1
10	8706461	8706540	3wt_3mu_merged_p20_peak_7444	1108	.	14.1964	110.803	108.412	30	3wt_3mu_merged_p20_peak_7444	7252.42	1.33783	0.266002	5.02939	4.92042e-07	6.43014e-05	4893.57	3668.53	3770.34	10443.4	10380.2	10358.5
10	9269639	9269770	3wt_3mu_merged_p20_peak_7479	2360	.	23.6348	236.04	233.349	66	3wt_3mu_merged_p20_peak_7479	19616	0.846355	0.213259	3.96867	7.22744e-05	0.00445716	14945.7	12886.9	14233.4	28251.5	21642.1	25736.6
10	9640703	9640832	3wt_3mu_merged_p20_peak_7507	444	.	7.92119	44.4752	42.4273	54	3wt_3mu_merged_p20_peak_7507	8081.33	0.96958	0.246544	3.93268	8.40049e-05	0.00499924	5305.79	5896.69	5186.27	10230.4	11159.1	10709.7
11	10405174	10405257	3wt_3mu_merged_p20_peak_12097	231	.	5.27533	23.1581	21.3411	55	3wt_3mu_merged_p20_peak_12097	3778.79	1.72782	0.431452	4.00465	6.21089e-05	0.00392943	1648.86	2722	880.844	6720.51	6485.59	4214.92
11	10456329	10456528	3wt_3mu_merged_p20_peak_12100	6723	.	43.1776	672.398	669.223	113	3wt_3mu_merged_p20_peak_12100	71173.1	2.14045	0.216019	9.90865	3.81775e-23	3.96443e-20	23278.3	30477	25190.5	87412.3	128089	132591
11	10807051	10807140	3wt_3mu_merged_p20_peak_12126	795	.	11.4189	79.5969	77.3328	33	3wt_3mu_merged_p20_peak_12126	7055.74	1.72743	0.343174	5.03369	4.8112e-07	6.31118e-05	4469.58	2286.95	3062.37	11833.2	13485	7197.3
11	11219369	11219455	3wt_3mu_merged_p20_peak_12170	1036	.	13.5792	103.653	101.288	45	3wt_3mu_merged_p20_peak_12170	8049.5	1.97454	0.313307	6.30224	2.9338e-10	8.12727e-08	3910.15	3680.29	2197.99	11544.1	16465.5	10499
11	11331007	11331136	3wt_3mu_merged_p20_peak_12177	9055	.	61.0708	905.556	902.207	67	3wt_3mu_merged_p20_peak_12177	42982.6	3.3491	0.26962	12.4216	1.99655e-35	8.24365e-32	8685.95	6237.67	8125.16	47424	103980	83442.7
11	11447261	11447566	3wt_3mu_merged_p20_peak_12185a	764	.	10.1926	76.4993	74.2504	79	3wt_3mu_merged_p20_peak_12185a	31804	0.993747	0.234478	4.23813	2.25388e-05	0.00173259	15269.6	27308.2	21214.3	44040.9	41212.4	41778.8
11	11447261	11447566	3wt_3mu_merged_p20_peak_12185b	1679	.	17.1098	167.962	165.408	246	3wt_3mu_merged_p20_peak_12185b	31804	0.993747	0.234478	4.23813	2.25388e-05	0.00173259	15269.6	27308.2	21214.3	44040.9	41212.4	41778.8
11	11557809	11557887	3wt_3mu_merged_p20_peak_12192	966	.	12.9619	96.6218	94.2839	32	3wt_3mu_merged_p20_peak_12192	7293.26	1.58614	0.302543	5.24267	1.58266e-07	2.32002e-05	3574.49	2868.98	4494.77	9986.93	8925.12	13909.2
11	11719432	11719662	3wt_3mu_merged_p20_peak_12202	5572	.	37.536	557.288	554.213	110	3wt_3mu_merged_p20_peak_12202	50745.7	0.943942	0.246578	3.82817	0.000129102	0.00708269	25292.3	42517.3	36328.6	50700.5	83371.5	66263.7
11	11837597	11837705	3wt_3mu_merged_p20_peak_12214	521	.	7.99484	52.1052	50.0014	49	3wt_3mu_merged_p20_peak_12214	6802.5	2.19088	0.475136	4.61105	4.00645e-06	0.000394538	2149.4	3010.07	2173.3	22971.5	4884.48	5626.28
11	12187221	12187550	3wt_3mu_merged_p20_peak_12248a	2841	.	21.443	284.187	281.419	95	3wt_3mu_merged_p20_peak_12248a	53214.2	1.33549	0.186917	7.14482	9.01135e-13	3.72962e-10	27777.4	30865	31973.8	66520.4	83144.3	79004.2
11	12187221	12187550	3wt_3mu_merged_p20_peak_12248b	998	.	10.6899	99.8551	97.5053	240	3wt_3mu_merged_p20_peak_12248b	53214.2	1.33549	0.186917	7.14482	9.01135e-13	3.72962e-10	27777.4	30865	31973.8	66520.4	83144.3	79004.2
11	12289592	12289684	3wt_3mu_merged_p20_peak_12255	773	.	11.2131	77.3906	75.1371	60	3wt_3mu_merged_p20_peak_12255	7536.78	1.13523	0.256561	4.42481	9.65259e-06	0.000841163	5376.45	4421.05	4346.59	10159.4	10558.7	10358.5
11	12353831	12353907	3wt_3mu_merged_p20_peak_12259	1703	.	19.0314	170.379	167.82	37	3wt_3mu_merged_p20_peak_12259	8919.44	1.65022	0.276356	5.97134	2.35319e-09	5.33439e-07	4870.02	4914.89	3136.46	11838.2	14496.6	14260.5
11	12388496	12388623	3wt_3mu_merged_p20_peak_12260	7981	.	58.946	798.193	794.921	69	3wt_3mu_merged_p20_peak_12260	35776.3	1.42715	0.19316	7.38842	1.48582e-13	6.65802e-11	19857	20435.6	17888.5	46171.2	58002.5	52303.3
11	12440576	12440701	3wt_3mu_merged_p20_peak_12263	3530	.	31.9934	353.091	350.23	67	3wt_3mu_merged_p20_peak_12263	22160.2	2.12036	0.242191	8.75489	2.04311e-18	1.41723e-15	8550.51	8701	7606.54	27145.8	46778.5	34179.2
11	12536266	12536513	3wt_3mu_merged_p20_peak_12267a	3923	.	34.5652	392.339	389.431	57	3wt_3mu_merged_p20_peak_12267a	36900.3	0.912749	0.199845	4.56728	4.94102e-06	0.000472095	24544.4	27666.8	24589.5	41849.8	46334.9	56416.1
11	12536266	12536513	3wt_3mu_merged_p20_peak_12267b	1084	.	13.9907	108.407	106.024	204	3wt_3mu_merged_p20_peak_12267b	36900.3	0.912749	0.199845	4.56728	4.94102e-06	0.000472095	24544.4	27666.8	24589.5	41849.8	46334.9	56416.1
11	12593482	12593556	3wt_3mu_merged_p20_peak_12270	666	.	10.1844	66.6029	64.4057	33	3wt_3mu_merged_p20_peak_12270	6216.63	2.16284	0.330872	6.53678	6.28573e-11	1.92588e-08	2379.07	1416.85	3021.21	11407.1	9157.72	9917.84
11	1332570	1332814	3wt_3mu_merged_p20_peak_11218	3026	.	24.4283	302.696	299.901	101	3wt_3mu_merged_p20_peak_11218	39036.5	1.16646	0.214339	5.44211	5.26529e-08	8.75441e-06	28360.4	22305.1	21518.9	61362.1	56780	43892.7
11	1333960	1334084	3wt_3mu_merged_p20_peak_11219	747	.	9.60005	74.7127	72.4732	53	3wt_3mu_merged_p20_peak_11219	10565.3	1.14487	0.264833	4.32298	1.53935e-05	0.00124742	8562.28	5920.21	5252.13	15043.8	14972.6	13641
11	13631849	13632006	3wt_3mu_merged_p20_peak_12353	1664	.	18.7228	166.406	163.856	80	3wt_3mu_merged_p20_peak_12353	17087	1.15424	0.256447	4.50089	6.76705e-06	0.000617965	8468.06	12146.1	11171.1	19152.2	30388.7	21195.9
11	1393702	1393849	3wt_3mu_merged_p20_peak_11227	1764	.	13.0685	176.452	173.879	75	3wt_3mu_merged_p20_peak_11227	21814.7	1.06409	0.2453	4.33791	1.43842e-05	0.00117662	13667.9	14985.7	13690.1	20328.9	33033.8	35181.8
11	1400584	1400686	3wt_3mu_merged_p20_peak_11228	3619	.	27.8996	361.969	359.097	35	3wt_3mu_merged_p20_peak_11228	22629.8	2.35235	0.220081	10.6886	1.15129e-26	1.70643e-23	7296.2	6860.85	8084	44867.7	37518	31152.1
11	1435813	1435999	3wt_3mu_merged_p20_peak_11236	6123	.	39.2203	612.372	609.248	63	3wt_3mu_merged_p20_peak_11236	52255.1	0.830757	0.209585	3.96383	7.3757e-05	0.00453247	30545.1	38366.7	43935.2	73017.7	71211.7	56454.4
11	1472927	1473036	3wt_3mu_merged_p20_peak_11244	1149	.	10.3986	114.979	112.574	36	3wt_3mu_merged_p20_peak_11244	11729.6	1.13081	0.233353	4.84592	1.26024e-06	0.000148975	7567.08	7242.99	7252.55	14105.5	18640	15569.7
11	151730	151968	3wt_3mu_merged_p20_peak_11050a	1207	.	10.4249	120.798	118.374	85	3wt_3mu_merged_p20_peak_11050a	25232.5	0.944534	0.23753	3.97648	6.9944e-05	0.00433658	19980.6	14821.1	16966.5	42559.9	29701.7	27365.1
11	151730	151968	3wt_3mu_merged_p20_peak_11050b	294	.	4.6089	29.4141	27.5132	206	3wt_3mu_merged_p20_peak_11050b	25232.5	0.944534	0.23753	3.97648	6.9944e-05	0.00433658	19980.6	14821.1	16966.5	42559.9	29701.7	27365.1
11	15178850	15178948	3wt_3mu_merged_p20_peak_12504	762	.	11.1102	76.2934	74.0452	44	3wt_3mu_merged_p20_peak_12504	8034.19	1.99442	0.292044	6.82917	8.54067e-12	3.04348e-09	3338.94	3104.14	3227.02	8713.84	15075.3	14745.8
11	15328018	15328146	3wt_3mu_merged_p20_peak_12508	3151	.	22.9637	315.105	312.293	51	3wt_3mu_merged_p20_peak_12508	25207	1.26884	0.227419	5.57928	2.41514e-08	4.35822e-06	16518	16008.7	11821.4	31320.1	42467.4	33106.3
11	15690158	15690318	3wt_3mu_merged_p20_peak_12528a	296	.	5.69351	29.6126	27.7104	15	3wt_3mu_merged_p20_peak_12528a	9758.94	1.58551	0.339707	4.66729	3.05198e-06	0.000312618	3609.82	6854.97	4165.48	8729.06	18315.4	16878.8
11	15690158	15690318	3wt_3mu_merged_p20_peak_12528b	405	.	6.81342	40.5091	38.4971	128	3wt_3mu_merged_p20_peak_12528b	9758.94	1.58551	0.339707	4.66729	3.05198e-06	0.000312618	3609.82	6854.97	4165.48	8729.06	18315.4	16878.8
11	15693693	15693817	3wt_3mu_merged_p20_peak_12529	370	.	6.20898	37.0891	35.1061	91	3wt_3mu_merged_p20_peak_12529	7425.35	1.26589	0.301797	4.19451	2.73464e-05	0.00202663	4610.91	4209.4	4264.27	7542.19	14199.1	9726.25
11	15874755	15875139	3wt_3mu_merged_p20_peak_12534a	794	.	6.70887	79.4015	77.1394	55	3wt_3mu_merged_p20_peak_12534a	99635.5	0.820109	0.20052	4.08991	4.31535e-05	0.00292546	63916.8	77262.5	74986.9	102426	151522	127699
11	15874755	15875139	3wt_3mu_merged_p20_peak_12534b	1733	.	10.7255	173.32	170.754	220	3wt_3mu_merged_p20_peak_12534b	99635.5	0.820109	0.20052	4.08991	4.31535e-05	0.00292546	63916.8	77262.5	74986.9	102426	151522	127699
11	15874755	15875139	3wt_3mu_merged_p20_peak_12534c	5947	.	24.4989	594.775	591.666	322	3wt_3mu_merged_p20_peak_12534c	99635.5	0.820109	0.20052	4.08991	4.31535e-05	0.00292546	63916.8	77262.5	74986.9	102426	151522	127699
11	16120221	16120370	3wt_3mu_merged_p20_peak_12553a	866	.	5.94828	86.6968	84.4008	22	3wt_3mu_merged_p20_peak_12553a	22738.8	1.41235	0.229285	6.1598	7.28387e-10	1.85483e-07	9828.37	14015.7	13418.5	28079.1	37761.4	33329.8
11	16120221	16120370	3wt_3mu_merged_p20_peak_12553b	876	.	5.99368	87.6872	85.3867	117	3wt_3mu_merged_p20_peak_12553b	22738.8	1.41235	0.229285	6.1598	7.28387e-10	1.85483e-07	9828.37	14015.7	13418.5	28079.1	37761.4	33329.8
11	16122698	16122973	3wt_3mu_merged_p20_peak_12554a	3108	.	19.352	310.818	308.013	95	3wt_3mu_merged_p20_peak_12554a	41798.3	2.35601	0.255072	9.23663	2.54387e-20	2.09075e-17	8385.62	16608.3	15995.1	64567.6	77794.6	67438.8
11	16122698	16122973	3wt_3mu_merged_p20_peak_12554b	959	.	8.99696	95.9324	93.5977	225	3wt_3mu_merged_p20_peak_12554b	41798.3	2.35601	0.255072	9.23663	2.54387e-20	2.09075e-17	8385.62	16608.3	15995.1	64567.6	77794.6	67438.8
11	16974879	16975168	3wt_3mu_merged_p20_peak_12643a	1310	.	15.6323	131.042	128.586	86	3wt_3mu_merged_p20_peak_12643a	53080.8	0.898261	0.19946	4.50345	6.68579e-06	0.00061198	40879.9	39895.2	30426.1	66768.9	77188.8	63326
11	16974879	16975168	3wt_3mu_merged_p20_peak_12643b	6009	.	46.6331	600.958	597.844	166	3wt_3mu_merged_p20_peak_12643b	53080.8	0.898261	0.19946	4.50345	6.68579e-06	0.00061198	40879.9	39895.2	30426.1	66768.9	77188.8	63326
11	17755363	17755481	3wt_3mu_merged_p20_peak_12728	1443	.	16.974	144.307	141.813	46	3wt_3mu_merged_p20_peak_12728	13472.6	1.75304	0.3627	4.8333	1.34292e-06	0.000157247	3980.81	8765.67	5746.06	10129	25136.4	27077.7
11	18019458	18019614	3wt_3mu_merged_p20_peak_12745	4259	.	36.7255	425.934	422.989	103	3wt_3mu_merged_p20_peak_12745	21671.3	4.52854	0.552757	8.19265	2.55545e-16	1.50733e-13	900.983	2892.49	1605.28	24995.2	52279.6	47354
11	1867951	1868043	3wt_3mu_merged_p20_peak_11270	795	.	7.42865	79.5565	77.2939	48	3wt_3mu_merged_p20_peak_11270	10648.5	0.966168	0.257114	3.75774	0.000171456	0.00887824	6200.88	7096.02	8339.2	11838.2	16871.2	13545.2
11	2222375	2222519	3wt_3mu_merged_p20_peak_11307	2290	.	22.7356	229.013	226.335	74	3wt_3mu_merged_p20_peak_11307	22694.4	2.52287	0.258585	9.75647	1.73076e-22	1.64012e-19	6377.55	6390.53	7417.2	27942.1	53323.6	34715.6
11	226942	227242	3wt_3mu_merged_p20_peak_11065a	527	.	7.249	52.764	50.6548	35	3wt_3mu_merged_p20_peak_11065a	19643.9	0.920764	0.224484	4.10168	4.10155e-05	0.0028036	13685.5	11346.6	15715.2	27429.8	27570.5	22115.6
11	226942	227242	3wt_3mu_merged_p20_peak_11065b	267	.	4.95949	26.7423	24.8733	126	3wt_3mu_merged_p20_peak_11065b	19643.9	0.920764	0.224484	4.10168	4.10155e-05	0.0028036	13685.5	11346.6	15715.2	27429.8	27570.5	22115.6
11	226942	227242	3wt_3mu_merged_p20_peak_11065c	378	.	6.02783	37.8388	35.8515	253	3wt_3mu_merged_p20_peak_11065c	19643.9	0.920764	0.224484	4.10168	4.10155e-05	0.0028036	13685.5	11346.6	15715.2	27429.8	27570.5	22115.6
11	2303250	2303417	3wt_3mu_merged_p20_peak_11313	593	.	9.46427	59.3084	57.1547	50	3wt_3mu_merged_p20_peak_11313	11236.3	1.61819	0.271999	5.94923	2.69408e-09	5.95914e-07	5070.24	6813.82	4675.88	13679.4	21225.6	15952.8
11	2326180	2326270	3wt_3mu_merged_p20_peak_11314	1481	.	17.2826	148.154	145.65	41	3wt_3mu_merged_p20_peak_11314	10260.9	1.46659	0.339973	4.31384	1.6044e-05	0.00129589	2985.61	8554.02	4815.83	16418.3	14058.4	14733.1
11	2416534	2416614	3wt_3mu_merged_p20_peak_11319	634	.	9.87576	63.4496	61.2707	31	3wt_3mu_merged_p20_peak_11319	5997.96	1.77754	0.342098	5.196	2.03621e-07	2.88961e-05	3156.39	3209.96	1753.45	12218.6	7902.79	7746.52
11	2478334	2478516	3wt_3mu_merged_p20_peak_11326	2042	.	21.6032	204.277	201.645	60	3wt_3mu_merged_p20_peak_11326	26010	1.20568	0.199104	6.0555	1.39984e-09	3.31181e-07	16541.6	15138.6	15517.7	39582.5	31632.8	37646.9
11	24827651	24827720	3wt_3mu_merged_p20_peak_13345	1417	.	16.7682	141.755	139.268	37	3wt_3mu_merged_p20_peak_13345	7866.13	13.6659	1.2112	11.2829	1.59409e-29	3.41285e-26	0	0	0	14749.6	17790.7	14656.4
11	2548953	2549153	3wt_3mu_merged_p20_peak_11330	6083	.	47.9386	608.301	605.18	103	3wt_3mu_merged_p20_peak_11330	40863	1.18936	0.20247	5.87426	4.24742e-09	9.09346e-07	22483.4	23392.7	28870.3	50568.7	64947.9	54915.3
11	256519	256601	3wt_3mu_merged_p20_peak_11074	342	.	4.98033	34.2405	32.2887	27	3wt_3mu_merged_p20_peak_11074	6373.85	1.28291	0.305594	4.1981	2.69169e-05	0.00200336	3497.93	4256.43	3383.43	8896.43	11516.1	6692.79
11	2649804	2650017	3wt_3mu_merged_p20_peak_11337	3427	.	26.636	342.719	339.872	128	3wt_3mu_merged_p20_peak_11337	35453.7	2.16736	0.206553	10.493	9.30166e-26	1.19486e-22	13126.1	13674.7	11928.4	69949.1	50137.6	53906.3
11	2712724	2712793	3wt_3mu_merged_p20_peak_11343	467	.	5.91735	46.7251	44.6602	27	3wt_3mu_merged_p20_peak_11343	5660.9	2.58877	0.341467	7.58131	3.42071e-14	1.68524e-11	1372.09	1158.17	2321.48	10007.2	11072.6	8033.9
11	295498	295570	3wt_3mu_merged_p20_peak_11083	280	.	3.63918	28.0396	26.1569	49	3wt_3mu_merged_p20_peak_11083	6556.76	1.69978	0.3158	5.38246	7.34757e-08	1.17437e-05	3545.04	2627.94	3087.07	12796.9	6880.46	10403.2
11	3211801	3211909	3wt_3mu_merged_p20_peak_11410	2800	.	23.6356	280.037	277.275	59	3wt_3mu_merged_p20_peak_11410	17590.5	2.41036	0.252322	9.55273	1.26324e-21	1.13506e-18	4640.36	6367.01	5704.9	33034.5	34153.5	21643
11	3331883	3331981	3wt_3mu_merged_p20_peak_11416	1972	.	19.5416	197.214	194.596	50	3wt_3mu_merged_p20_peak_11416	14459.3	0.939487	0.218683	4.29611	1.73821e-05	0.00138909	10228.8	9847.41	9656.35	18609.5	21387.8	17025.7
11	3494917	3495018	3wt_3mu_merged_p20_peak_11437	850	.	8.64562	85.0139	82.726	50	3wt_3mu_merged_p20_peak_11437	9366.85	2.69215	0.29254	9.20268	3.49135e-20	2.76464e-17	3003.28	2545.63	1975.72	21414.3	13474.2	13787.9
11	3516609	3516796	3wt_3mu_merged_p20_peak_11442	4122	.	31.927	412.291	409.361	75	3wt_3mu_merged_p20_peak_11442	42214.5	1.27135	0.217574	5.84329	5.11793e-09	1.07841e-06	27618.4	20318	26260.7	51725.1	72807.4	54557.7
11	3544780	3545002	3wt_3mu_merged_p20_peak_11448a	4934	.	18.0584	493.449	490.434	84	3wt_3mu_merged_p20_peak_11448a	68665.6	0.801189	0.182497	4.39015	1.13274e-05	0.00096481	46091.5	52511.7	51624	98657.1	82067.9	81041.5
11	3544780	3545002	3wt_3mu_merged_p20_peak_11448b	2313	.	10.9222	231.339	228.656	173	3wt_3mu_merged_p20_peak_11448b	68665.6	0.801189	0.182497	4.39015	1.13274e-05	0.00096481	46091.5	52511.7	51624	98657.1	82067.9	81041.5
11	3590623	3590916	3wt_3mu_merged_p20_peak_11456a	1493	.	15.8242	149.322	146.815	71	3wt_3mu_merged_p20_peak_11456a	27088.8	1.08556	0.2076	5.22907	1.70369e-07	2.47859e-05	18461.3	17672.4	15921	37695.7	41904.8	30877.5
11	3590623	3590916	3wt_3mu_merged_p20_peak_11456b	816	.	11.0042	81.6486	79.376	262	3wt_3mu_merged_p20_peak_11456b	27088.8	1.08556	0.2076	5.22907	1.70369e-07	2.47859e-05	18461.3	17672.4	15921	37695.7	41904.8	30877.5
11	41222964	41223078	3wt_3mu_merged_p20_peak_14880	1167	.	11.5503	116.777	114.367	54	3wt_3mu_merged_p20_peak_14880	12598.4	1.48974	0.263857	5.64603	1.642e-08	3.13255e-06	5199.79	8489.35	6157.67	18934.1	21112	15697.4
11	41540044	41540177	3wt_3mu_merged_p20_peak_14927	1664	.	18.7228	166.406	163.856	51	3wt_3mu_merged_p20_peak_14927	18618	2.1361	0.311963	6.84728	7.52696e-12	2.69689e-09	8273.73	5808.5	6618.67	15652.5	37388.2	37966.2
11	44311684	44311753	3wt_3mu_merged_p20_peak_15171	1042	.	6.98684	104.244	101.877	35	3wt_3mu_merged_p20_peak_15171	12353.6	1.22328	0.260176	4.70175	2.57945e-06	0.000271266	5511.9	8659.84	8059.31	19375.4	17801.6	14713.9
11	44417120	44417265	3wt_3mu_merged_p20_peak_15190	1521	.	7.16596	152.141	149.626	81	3wt_3mu_merged_p20_peak_15190	26300.2	1.10567	0.218891	5.05124	4.38957e-07	5.82865e-05	19132.6	13563	17369.9	38400.7	30832.2	38502.7
11	44418279	44418604	3wt_3mu_merged_p20_peak_15191	13948	.	28.8696	1394.8	1391.13	97	3wt_3mu_merged_p20_peak_15191	195265	0.871215	0.173789	5.01306	5.3572e-07	6.94339e-05	122852	134566	156700	251864	259186	246426
11	44647274	44647383	3wt_3mu_merged_p20_peak_15207	3153	.	20.9239	315.378	312.566	33	3wt_3mu_merged_p20_peak_15207	20911.5	1.42814	0.30651	4.65935	3.17211e-06	0.000323043	14068.3	7372.33	12554.1	18350.8	36268.5	36855
11	44651868	44652138	3wt_3mu_merged_p20_peak_15208a	425	.	5.28413	42.5588	40.5295	23	3wt_3mu_merged_p20_peak_15208a	29372.2	1.03675	0.218643	4.74173	2.119e-06	0.000230099	21759	16408.4	19584.4	33597.5	47211.2	37672.5
11	44651868	44652138	3wt_3mu_merged_p20_peak_15208b	455	.	5.4778	45.5397	43.4835	127	3wt_3mu_merged_p20_peak_15208b	29372.2	1.03675	0.218643	4.74173	2.119e-06	0.000230099	21759	16408.4	19584.4	33597.5	47211.2	37672.5
11	44651868	44652138	3wt_3mu_merged_p20_peak_15208c	1411	.	10.7624	141.134	138.65	208	3wt_3mu_merged_p20_peak_15208c	29372.2	1.03675	0.218643	4.74173	2.119e-06	0.000230099	21759	16408.4	19584.4	33597.5	47211.2	37672.5
11	44774699	44774853	3wt_3mu_merged_p20_peak_15239	5568	.	24.1176	556.879	553.804	74	3wt_3mu_merged_p20_peak_15239	55115.6	0.862995	0.184304	4.68245	2.83468e-06	0.000294535	35179.6	39566	42576.8	66545.7	77924.4	68901.2
11	44795166	44795251	3wt_3mu_merged_p20_peak_15246	1445	.	15.3535	144.574	142.079	48	3wt_3mu_merged_p20_peak_15246	10495.6	1.14591	0.240603	4.76266	1.91061e-06	0.000212664	6006.55	6026.03	7573.61	14744.5	13295.7	15327
11	45200075	45200190	3wt_3mu_merged_p20_peak_15290	335	.	6.68672	33.5063	31.559	60	3wt_3mu_merged_p20_peak_15290	6527.92	5.95303	0.779286	7.63908	2.18776e-14	1.1061e-11	429.881	58.7905	131.715	10052.9	15491.9	13002.4
11	45255704	45255872	3wt_3mu_merged_p20_peak_15297	2137	.	15.0137	213.75	211.1	34	3wt_3mu_merged_p20_peak_15297	23580.6	1.92743	0.232667	8.28409	1.19015e-16	7.16637e-14	11206.3	8066.06	10183.2	45780.6	34488.8	31758.8
11	45336099	45336261	3wt_3mu_merged_p20_peak_15310	1032	.	11.2728	103.233	100.87	105	3wt_3mu_merged_p20_peak_15310	16556.3	1.44394	0.242409	5.95662	2.57504e-09	5.72273e-07	9669.37	9353.57	7672.39	25827.1	28295.3	18520.1
11	45456860	45456918	3wt_3mu_merged_p20_peak_15331	316	.	6.14985	31.6732	29.7492	36	3wt_3mu_merged_p20_peak_15331	3123.95	3.45145	0.480064	7.18956	6.49995e-13	2.74926e-10	806.763	582.026	172.876	5761.89	5436.21	5983.91
11	727545	727628	3wt_3mu_merged_p20_peak_11124	283	.	6.06948	28.3687	26.4793	62	3wt_3mu_merged_p20_peak_11124	4007.94	12.6931	1.23807	10.2523	1.15526e-24	1.38166e-21	0	0	0	6152.44	10742.6	7152.59
11	7944360	7944544	3wt_3mu_merged_p20_peak_11885	1987	.	21.1917	198.763	196.141	122	3wt_3mu_merged_p20_peak_11885	21330.8	1.76591	0.207644	8.50452	1.82345e-17	1.17552e-14	10175.8	9788.62	9113.03	28363.1	35873.6	34670.9
11	822402	822502	3wt_3mu_merged_p20_peak_11144	719	.	10.6987	71.9449	69.7188	62	3wt_3mu_merged_p20_peak_11144	7531.01	1.29065	0.308527	4.18328	2.87335e-05	0.0021087	5294.01	4967.8	2840.1	9286.99	10510	12287.1
11	8353913	8354013	3wt_3mu_merged_p20_peak_11910	778	.	10.7366	77.8366	75.5814	39	3wt_3mu_merged_p20_peak_11910	8176.26	4.27574	0.359073	11.9077	1.0787e-32	3.06662e-29	423.992	993.56	996.094	10636.2	19256.6	16751.1
11	8401744	8401863	3wt_3mu_merged_p20_peak_11922	582	.	9.3614	58.2847	56.1375	32	3wt_3mu_merged_p20_peak_11922	7598.66	1.70676	0.310308	5.50021	3.79349e-08	6.52233e-06	3868.93	2957.16	3869.13	13836.6	13479.6	7580.47
12	10378784	10378844	3wt_3mu_merged_p20_peak_16461	569	.	6.00481	56.9311	54.7941	31	3wt_3mu_merged_p20_peak_16461	6173.61	2.07158	0.352418	5.8782	4.14758e-09	8.89068e-07	3521.49	2181.13	1407.7	9347.85	11380.9	9202.58
12	14778003	14778213	3wt_3mu_merged_p20_peak_16797	4910	.	28.7148	491.031	488.018	114	3wt_3mu_merged_p20_peak_16797	48006.8	0.883735	0.185034	4.77608	1.78747e-06	0.000200761	30191.8	36744.1	34303.5	57446.4	64266.3	65088.6
12	15082657	15082729	3wt_3mu_merged_p20_peak_16812	302	.	6.02087	30.2649	28.3542	46	3wt_3mu_merged_p20_peak_16812	3882.76	1.31458	0.350564	3.74991	0.000176898	0.00910023	2720.62	2040.03	1918.1	6066.21	6426.09	4125.51
12	15821418	15821575	3wt_3mu_merged_p20_peak_16867	2399	.	19.3406	239.906	237.209	80	3wt_3mu_merged_p20_peak_16867	25821	1.10802	0.196593	5.6361	1.7394e-08	3.30745e-06	15369.7	17084.5	16645.5	38162.4	36052.1	31611.9
12	17062089	17062326	3wt_3mu_merged_p20_peak_16972	7282	.	42.4386	728.245	725.026	153	3wt_3mu_merged_p20_peak_16972	76570.4	1.03908	0.246194	4.22058	2.43676e-05	0.00184208	32800.5	51230.1	66367.9	87523.9	109460	112040
12	17603448	17603559	3wt_3mu_merged_p20_peak_17052	2534	.	23.2864	253.427	250.708	49	3wt_3mu_merged_p20_peak_17052	18069.3	1.09278	0.272862	4.00489	6.20476e-05	0.00392805	10158.1	8512.87	15945.7	19705	27738.2	26356
12	17738892	17739214	3wt_3mu_merged_p20_peak_17064a	1747	.	11.2639	174.713	172.144	96	3wt_3mu_merged_p20_peak_17064a	93887.1	0.998199	0.262962	3.79598	0.000147059	0.0078906	43730.1	57091.5	87121.2	97267.3	162042	116070
12	17738892	17739214	3wt_3mu_merged_p20_peak_17064b	6491	.	27.3552	649.115	645.96	181	3wt_3mu_merged_p20_peak_17064b	93887.1	0.998199	0.262962	3.79598	0.000147059	0.0078906	43730.1	57091.5	87121.2	97267.3	162042	116070
12	18357955	18358101	3wt_3mu_merged_p20_peak_17142	1494	.	17.3855	149.441	146.934	83	3wt_3mu_merged_p20_peak_17142	16481.8	1.05147	0.256409	4.10076	4.11796e-05	0.00281039	10328.9	12146.1	9705.74	16499.5	28874.1	21336.4
12	18398231	18398390	3wt_3mu_merged_p20_peak_17143	1180	.	14.8136	118.065	115.649	85	3wt_3mu_merged_p20_peak_17143	16675.1	1.18291	0.235416	5.02477	5.04041e-07	6.57209e-05	9003.94	8724.51	12875.1	21754.2	24216.8	23475.8
12	18916529	18916770	3wt_3mu_merged_p20_peak_17192a	240	.	4.1568	24.03	22.2009	14	3wt_3mu_merged_p20_peak_17192a	30875.6	1.10667	0.244675	4.52301	6.09651e-06	0.000565667	14038.8	18630.7	26087.8	37655.1	43332.8	45508.4
[truncated: 1,100 more rows]

## Sheet: ATAC_PeaksUp
Omni-ATAC-seq peaks up in linc-mipep; linc-wrb mutant brains compared to WT brains at 5dpf
[truncated: 1,200 more rows]

[truncated: 1 more sheets: ATAC_PeaksUnaffected]
